# Supplementary material for: Access to chiral sulfones with an all-carbon quaternary stereocenter from sulfur dioxide
Source: Royal Society of Chemistry journal article supplement (doi:10.1039/d4qo00671b), 2024-01-01

## Supporting Information

### Access to Chiral Sulfones with An All-Carbon Quaternary Stereocenter from Sulfur Dioxide

Chunxi Huang,<sup>1†</sup> Xuemei Zhang,<sup>1†</sup> Liping Luo,<sup>1</sup> Xiuwen Jia,<sup>1</sup> Jian Liao<sup>\*2</sup> and Zhong Lian<sup>\*1</sup>

[1] C. Huang, Dr. X. Zhang, Dr. Li Xue, L. Luo, X. Jia, Prof. Dr. Z. Lian

Department of Dermatology, State Key Laboratory of Biotherapy and Cancer Center

West China Hospital, Sichuan University

[2] Prof. Dr. J. Liao

Chengdu Institute of Biology, Chinese Academy of Sciences

†These authors contributed equally.

### Table of Contents

|                                                                   |    |
|-------------------------------------------------------------------|----|
| 1. General information .....                                      | 2  |
| 2. General procedure for the synthesis of starting material ..... | 2  |
| 3. General procedure for the synthesis of pybim ligands .....     | 5  |
| 4. Effect of Reaction Parameters .....                            | 6  |
| 5. General procedure for the synthesis of compounds 3 and 5.....  | 9  |
| 6. Characterization data of products 3 and 5 .....                | 10 |
| 7. Transformations.....                                           | 30 |
| 8. Mechanistic Experiments.....                                   | 32 |
| 9. Reference.....                                                 | 35 |
| 10. HRMS detection of intermediates.....                          | 36 |
| 11. Single Crystal X-Ray Diffraction Data.....                    | 37 |
| 12. The spectrums of NMR and HPLC chromatograms.....              | 48 |

## 1. General information

All reactions were carried out in oven dried two-chamber under argon atmosphere glovebox (Vigor, SGI800-750TS-F). Unless otherwise noted, all reactions or reagents were obtained from commercial suppliers and used as received. All work-up and purification procedures were carried out with reagent-grade solvents in air. Chromatography was generally performed on silica gel (200-300 mesh) and reactions were monitored by thin layer chromatography (TLC) using UV light to visualize the course of the reactions.

$^1\text{H}$  NMR,  $^{13}\text{C}$  NMR and  $^{19}\text{F}$  NMR spectra were recorded at 400 MHz, 100 MHz and 376 MHz, respectively in  $\text{CDCl}_3$  or  $(\text{CD}_3)_2\text{SO}$  at room temperature.  $^1\text{H}$  NMR was reported as follows: chemical shift, multiplicity (s = singlet, d = doublet, t = triplet, q = quadruplet, m = multiplet), coupling constant ( $J$  values) in Hz and integration. Chemical shifts ( $\delta$ ) were reported with respect to the corresponding solvent residual peak at 2.50 ppm for  $(\text{CD}_3)_2\text{SO}$  for  $^1\text{H}$  NMR. The  $^{13}\text{C}$  NMR spectra ( $^1\text{H}$ -broadband decoupled) were reported in ppm using the central peak of  $(\text{CD}_3)_2\text{SO}$  at 39.52 ppm. The solvent residue peak of ethyl acetate in  $(\text{CD}_3)_2\text{SO}$  was at 1.99 ppm, 4.03 ppm and 1.17 ppm for  $^1\text{H}$  NMR and 20.68 ppm, 170.31 ppm, 59.74 ppm and 14.40 ppm for  $^{13}\text{C}$  NMR. The solvent residue peak for dichloromethane in  $(\text{CD}_3)_2\text{SO}$  is at 5.76 ppm for  $^1\text{H}$  NMR and 54.84 ppm for  $^{13}\text{C}$  NMR.

High-resolution mass spectrometric measurements were provided by the Department of The State Key Laboratory of Biotherapy, Sichuan University. The molecular ion  $[\text{M}+\text{H}]^+$  and  $[\text{M}+\text{Na}]^+$  are given in  $m/z$  units.

Enantiomer ratios were determined by UHPLC (Chiralpak AD-H, OD-H, IA-H, IB-H, IC-H columns were purchased from Daicel Chemical Industries, LTD). Optical rotations were measured on an INESA SGW-1 polarimeter, and reported as  $[\alpha]_{\lambda}^T$  (concentration (c): g/100 mL, in  $\text{CHCl}_3$ ).

## 2. General procedure for the synthesis of starting material

### A. General procedure for the synthesis of $\alpha, \beta$ -unsaturated amides<sup>[1-4]</sup>

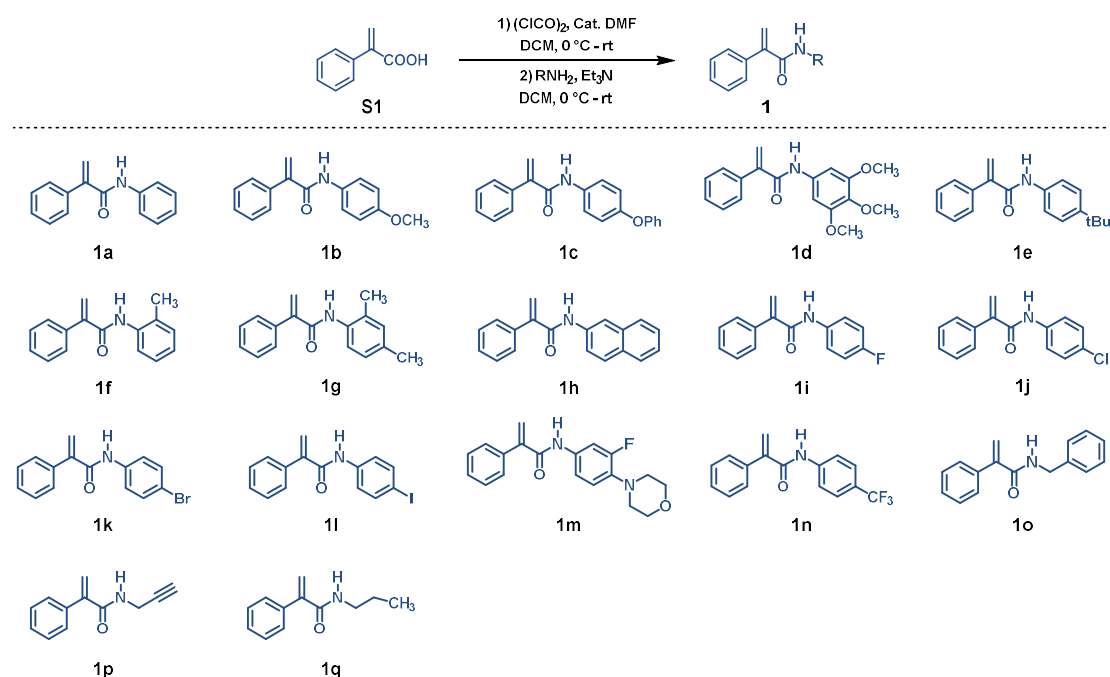

The procedure was based on a modified literature procedure. Oxalyl chloride (10.0 mmol, 2.0 equiv.) was added dropwise to a solution of 2-aryl acrylic acid (5.0 mmol, 1.0 equiv.) in dry DCM (20 mL) under N<sub>2</sub> at 0 °C, followed by the addition of a catalytic amount of dry DMF (3 drops). The reaction mixture was stirred at room temperature for 3 hours. Subsequently, the reaction was evaporated under reduced pressure and the resulting crude acyl chloride was used directly for the next reaction without further purification.

For the next step, a solution of aniline (5.0 mmol, 1.0 equiv.) and Et<sub>3</sub>N (1.1 mL, 7.5 mmol, 1.5 equiv.) in DCM (30 mL) was prepared at 0 °C. To this solution, a solution of acyl chloride (5.0 mmol, 1.0 equiv.) in DCM was added dropwise, and the resulting mixture was stirred at room temperature for 3 hours. The mixture was then diluted with DCM (20 mL) and washed sequentially with saturated NaHCO<sub>3</sub> (aq. 30 mL) and brine (30 mL). The organic extracts were dried with anhydrous Na<sub>2</sub>SO<sub>4</sub>, filtered, and concentrated under reduced pressure to give the corresponding  $\alpha$ ,  $\beta$ -unsaturated amides. The product was purified by flash chromatography.

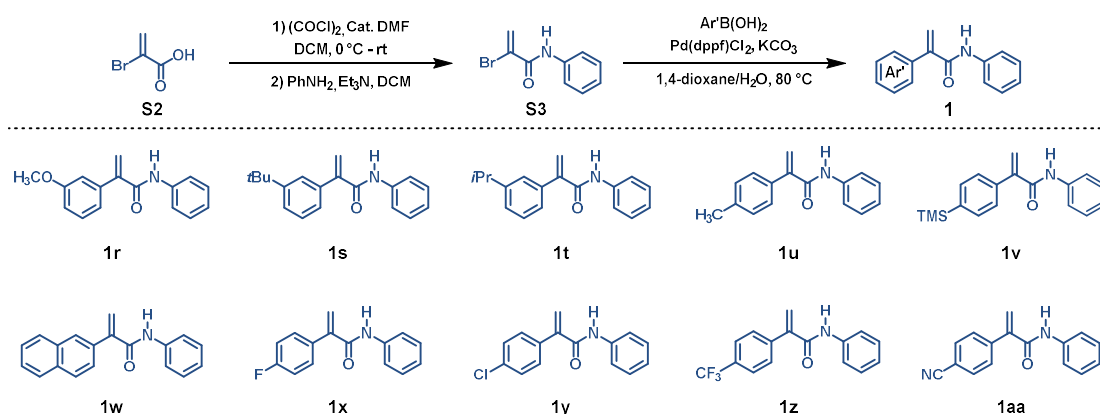

The procedure was based on a modified literature procedure. Oxalyl chloride (10.0 mmol, 2.0 equiv.) was added dropwise to a solution of 2-bromoacrylic acid (5.0 mmol, 1.0 equiv.) in dry dichloromethane (DCM, 20 mL) at 0 °C under a nitrogen atmosphere, followed by some dimethylformamide (DMF, 3 drops). The reaction mixture was stirred at room temperature for 2 hours. The volatiles were evaporated under reduced pressure and the resulting crude acyl chloride was used directly for the next reaction without further purification. To a solution of aniline (5.0 mmol, 1.0 equiv.) and Et<sub>3</sub>N (7.5 mmol, 1.5 equiv.) in DCM (20.0 mL) at 0 °C was added dropwise a solution of acyl chloride (5.0 mmol, 1.0 equiv.) in DCM (5.0 mL), the resulting mixture was stirred at room temperature for 2 hours. The mixture was washed by H<sub>2</sub>O, and the organic extracts were dried with anhydrous Na<sub>2</sub>SO<sub>4</sub>, filtered, and concentrated under reduced pressure. Finally, the residue was purified by column chromatography to give the desired 2-bromoacrylic amide.

In glovebox, to a pressure bottle was added the 2-bromoacrylic amide (2.0 mmol, 1.0 equiv.), aryl boronic acid (2.4 mmol, 1.2 equiv.), Pd(dppf)Cl<sub>2</sub> (0.04 mmol, 0.02 equiv.), K<sub>2</sub>CO<sub>3</sub> (2.4 mmol, 1.2 equiv.), dioxane (5.0 mL) and water (5.0 mL). The bottle was sealed and removed out of the glovebox and heated to 80 °C for 6 hours in an oil bath. After 6 hours, the bottle was cooled to room temperature. The mixture was washed by brine, dried, concentrated and purified by column chromatography to give the desired product.

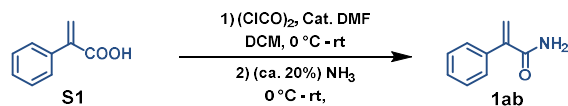

The procedure was based on a modified literature procedure. To a solution of atropic acid (3.37 mmol, 1.0 equiv.) and oxalyl chloride (4.1 mmol, 1.2 equiv.) in anhydrous DCM (6.7 mL), was added a drop of anhydrous DMF. The reaction was then stirred at room temperature for 3 h. The excess amount of solvent and oxalyl chloride were removed in vacuo, and (ca. 20%) aqueous solution of NH<sub>3</sub> (0.54 mL) was added to the residue under stirring at 0 °C. The reaction was stirred at room temperature for another 1 h. The reaction mixture was extracted with ethyl acetate (15 mL × 3), then combined organic layer was then washed with brine, dried over Na<sub>2</sub>SO<sub>4</sub>, and concentrated in vacuo. The solid residue was purified through crystallization (10% EA/PE) to afford the product as a colorless crystalline solid (367 mg, 2.49 mmol, 74%).

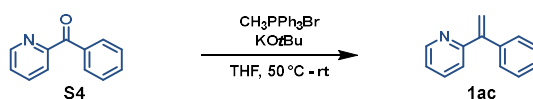

The procedure was based on a modified literature procedure. A dry 100 mL round bottom flask equipped with a magnetic stir bar was charged with methyltriphenylphosphonium bromide (10 mmol, 2.0 equiv.) and KOtBu (12 mmol, 1.2 equiv.) followed by THF (20 mL). The resulting yellow suspension was stirred at room temperature for 1 hour. A solution of 2-benzoylpyridine (5.0 mmol, 1.0 equiv.) in THF (10 mL) was added dropwise and the resulting mixture was stirred at 50 °C for 1 hour and allowed to cool down overnight. Next, a saturated solution of NH<sub>4</sub>Cl (25 mL) followed by distilled water (25 mL) were added and the resulting mixture was extracted with ethyl acetate (3 × 50 mL). The organic phases were combined and dried with anhydrous Na<sub>2</sub>SO<sub>4</sub>. The solvent was removed under reduced pressure and the residue was further purified by flash chromatography on silica gel to afford the corresponding alkenes.

## B. General procedure for the synthesis of diazonium salts<sup>[5-6]</sup>

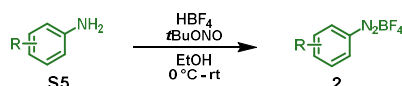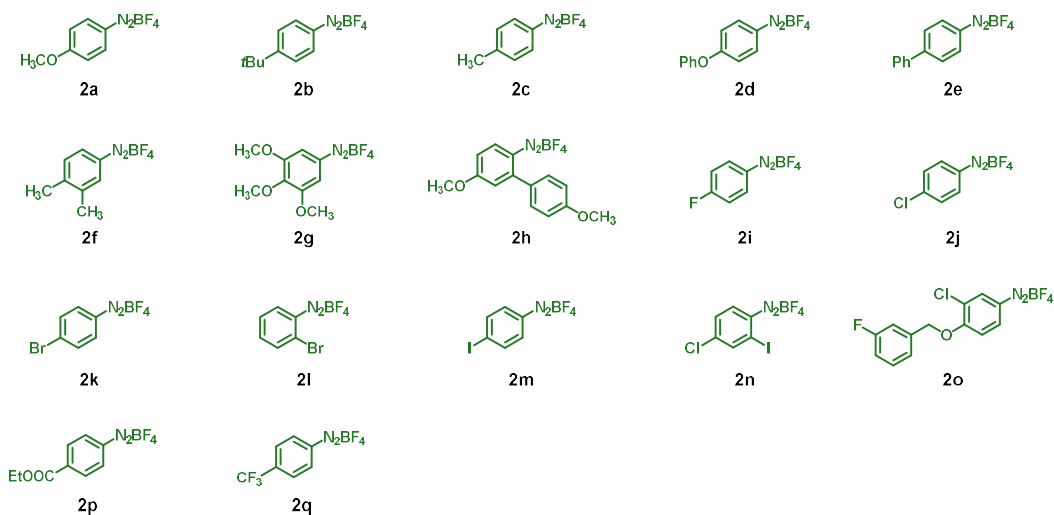

In a 100 mL round-bottom flask, the aniline (10.0 mmol, 1.0 equiv.) was dissolved in a mixture of absolute ethanol (3.0 mL) and an aqueous solution of HBF<sub>4</sub> (48% aq. 13.6 mmol, 1.36 equiv.), followed by dropwise addition of tert-butyl nitrite (23.0 mmol, 2.3 equiv.) at 0 °C. After stirring at room temperature for 2 hours, diethyl ether (20 mL) was added to precipitate the arenediazonium tetrafluoroborate. The solids were filtered off and washed with diethyl ether (3×10 mL), dried in vacuo for 10 minutes, and stored in refrigerator under N<sub>2</sub> atmosphere.

### C. sGeneral procedure for the synthesis of **4**<sup>[7]</sup>

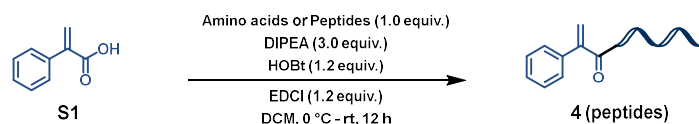

To a mixture of **1a** (0.44 g, 3.0 mmol), amino acids or peptides (3.0 mmol), and diisopropylethylamine (1.16 g, 9.0 mmol) in dry CH<sub>2</sub>Cl<sub>2</sub> (20 mL) was added 1-(3-dimethylaminopropyl)-3-ethylcarbodiimide hydrochloride (EDCI, 0.69 g, 3.6 mmol) and 1-hydroxybenzotriazole (HOBt, 0.49 g, 3.6 mmol) in portions at 0 °C. The reaction mixture was stirred at 0 °C for 2 h and stirred at 25 °C for 12 h. The mixture was washed with sat. aq. NaHCO<sub>3</sub> (1 x 20 mL), citric acid (1 x 20 mL) and H<sub>2</sub>O (1 x 20 mL), dried over anhydrous MgSO<sub>4</sub>, filtrated, and concentrated. The resulting crude material was purified by column chromatography on silica gel to provide **4** as a white solid.

### 3. General procedure for the synthesis of pybim ligands<sup>[8]</sup>

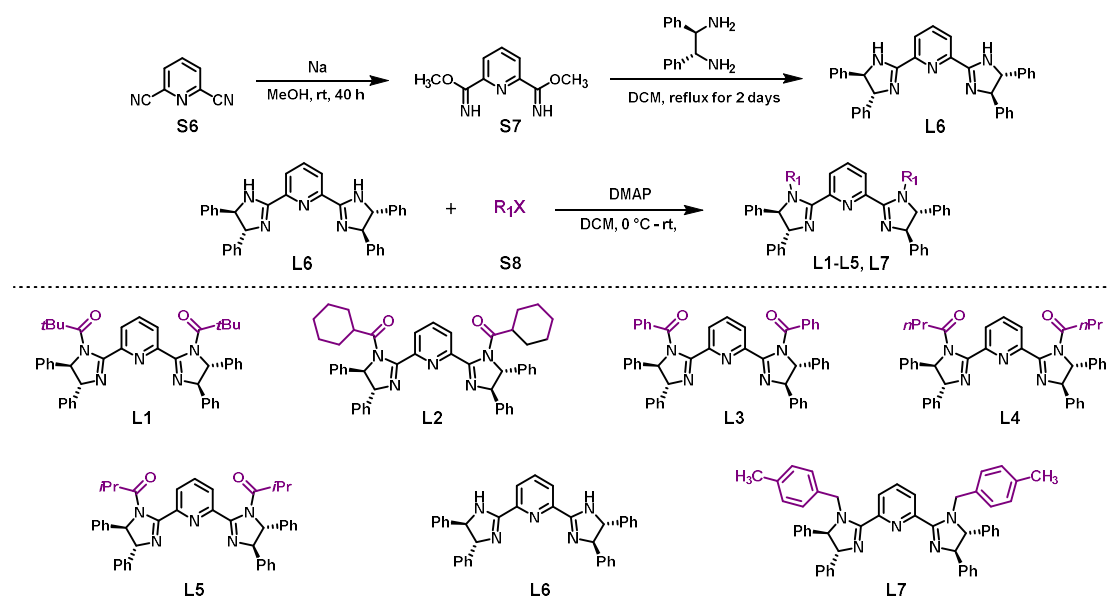

To pyridine-2,6-carbodinitrile **S6** (41.5 mmol) in anhydrous MeOH (100 mL), Na (5.2 mmol) was added. After stirring for 40 h at room temperature, acetic acid (5.25 mmol) was added and the solvent was removed under reduced pressure. **S7** was obtained as a yellow powder (100 %) and was used directly for further reactions.

A 100 mL pressure tube was charged with **S7** (804 mg, 4.17 mmol), (*R, R*)-1,2-diphenyl ethylene diamine (8.75 mmol) and DCM (20 mL). After the resulting mixture was stirred at refluxing temperature for two days, water (20 mL) was added and the phases

were separated. The aqueous phase was extracted with DCM (20 mL x 2). The combined organic layer was dried over MgSO<sub>4</sub> and the solvent was removed in vacuo to give a yellow solid, which was purified by crystallization to give **L6** as a white solid.

To a stirring solution of **L6** (0.62 mmol) in anhydrous THF (15 mL), sodium hydride (2.47 mmol) was added at 0 °C. After 15 min, 4-Methylbenzyl bromide (1.85 mmol) was slowly added and the reaction mixture was stirred at room temperature for 4 h. The reaction mixture was quenched with water and the aqueous phase was extracted with DCM (20 mL x 2). The organic layer was dried over MgSO<sub>4</sub> and the solvents were removed in vacuo to give a yellow solid, which was purified by column chromatography on silica gel to give **L7** as a white solid.

A 100 mL round-bottom flask was charged with **L6** (1.0 mmol), DMAP (3.0 mmol) and DCM (15 mL). The resulting mixture was cooled to 0 °C, and acyl chloride (2.5 mmol) was added neat at once. The ice bath was removed, and the reaction mixture was stirred at room temperature for 5 hours. The solvent was removed under vacuo, the residue was partitioned between saturated NH<sub>4</sub>Cl (25 mL) and ethyl acetate (25 mL), and the aqueous phase was re-extracted with ethyl acetate (25 mL x 2). The combined organic layer was dried (over MgSO<sub>4</sub>), and the solvent was removed in vacuo to give **L1-L5** as a white solid, which was purified by column chromatography on silica gel.

## 4. Detailed Optimization of Reaction Conditions

### Supplementary Table S1. Reaction condition optimization: screening of solvent

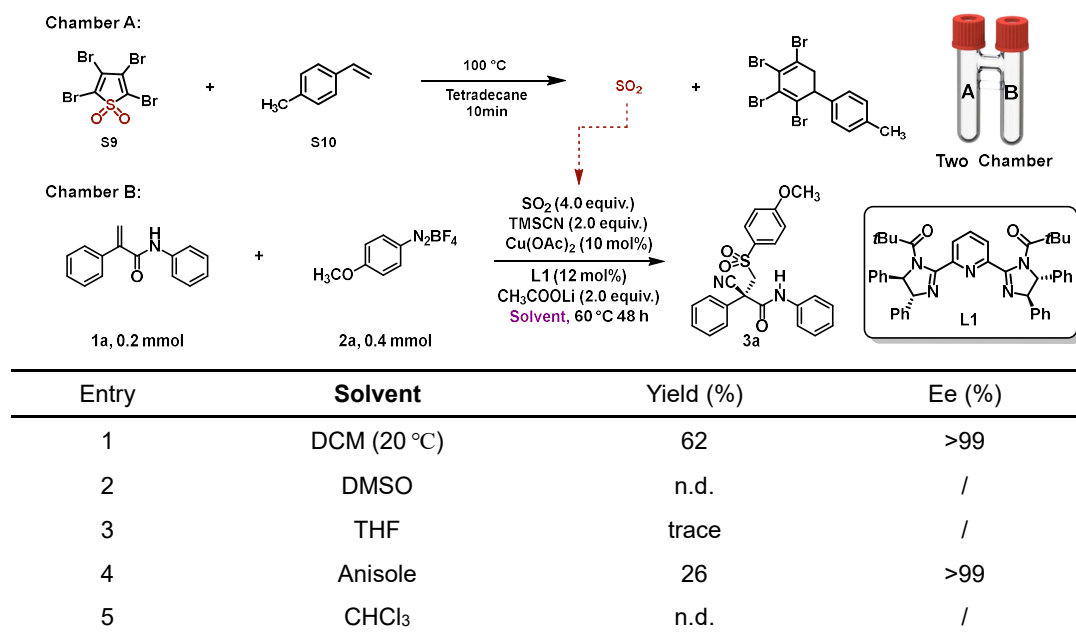

[a] Reaction conditions: The metal and ligand were stirred for 1h in advance. Chamber A, **S9** (0.88 mmol), **S10** (0.8 mmol), tetradecane (1 mL), at 100 °C for 10 min; Chamber B, **1a** (0.2 mmol, 1.0 equiv.), **2a** (0.4 mmol), TMSCN (0.4 mmol), CH<sub>3</sub>COOLi (0.4 mmol), Cu(OAc)<sub>2</sub> (10 mol%), **L1** (12 mol%), Solvent (x mL), at 60 °C for 48 h. Yields were determined by <sup>1</sup>H NMR (1,3,5-Trimethoxybenzene was the internal standard). Enantiomeric excess (ee) was determined by ultra-high-performance liquid chromatography with a chiral stationary phase.

### Supplementary Table S2. Reaction condition optimization: screening of base

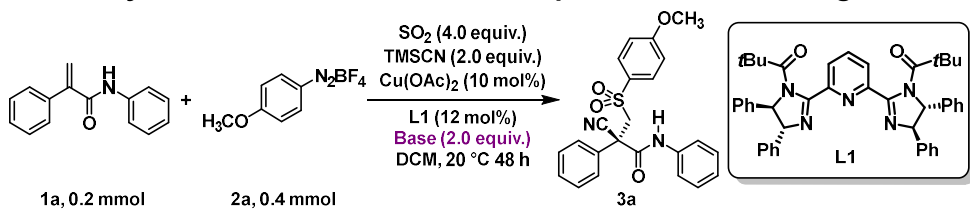

| Entry | Base                               | Yield (%) | Ee (%) |
|-------|------------------------------------|-----------|--------|
| 1     | None                               | n.d.      | /      |
| 2     | CsF                                | 40        | >99    |
| 3     | <i>t</i> BuOLi                     | 21        | >99    |
| 4     | CH <sub>3</sub> COONa              | 15        | >99    |
| 5     | CH <sub>3</sub> COOK               | 17        | >99    |
| 6     | CH <sub>3</sub> COOLi (2.0 equiv.) | 62        | >99    |
| 7     | CH <sub>3</sub> COOLi (2.5 equiv.) | 66        | >99    |
| 8     | CH <sub>3</sub> COOLi (3.0 equiv.) | 59        | >99    |

[a] Reaction conditions: The metal and ligand were stirred for 1h in advance. Chamber A, **S9** (0.88 mmol), **S10** (0.8 mmol), tetradecane (1 mL), at 100 °C for 10 min; Chamber B, **1a** (0.2 mmol, 1.0 equiv.), **2a** (0.4 mmol), TMSCN (0.4 mmol), base (x mmol), Cu(OAc)<sub>2</sub> (10 mol%), **L1** (12 mol%), DCM (2.5 mL), at 20 °C for 48 h. Yields were determined by <sup>1</sup>H NMR (1,3,5-Trimethoxybenzene was the internal standard). Enantiomeric excess (ee) was determined by ultra-high-performance liquid chromatography with a chiral stationary phase.

### Supplementary Table S3. Reaction condition optimization: screening of TMSCN ratio

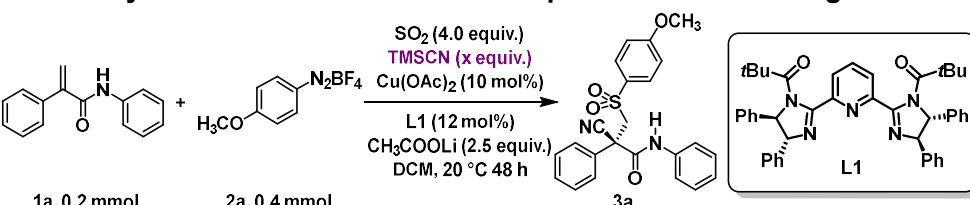

| Entry | TMSCN (x equiv.) | Yield (%) | Ee (%) |
|-------|------------------|-----------|--------|
| 1     | 2.0              | 66        | >99    |
| 2     | 1.75             | 67        | >99    |
| 3     | 1.5              | 71        | >99    |
| 4     | 1.25             | 65        | >99    |
| 5     | 1.0              | 61        | >99    |

[a] Reaction conditions: The metal and ligand were stirred for 1h in advance. Chamber A, **S9** (0.88 mmol), **S10** (0.8 mmol), tetradecane (1 mL), at 100 °C for 10 min; Chamber B, **1a** (0.2 mmol, 1.0 equiv.), **2a** (0.4 mmol), TMSCN (x mmol), CH<sub>3</sub>COOLi (0.5 mmol), Cu(OAc)<sub>2</sub> (10 mol%), **L1** (12 mol%), DCM (2.5 mL), at 20 °C for 48 h. Yields were determined by <sup>1</sup>H NMR (1,3,5-Trimethoxybenzene was the internal standard). Enantiomeric excess (ee) was determined by ultra-high-performance liquid chromatography with a chiral stationary phase.

**Supplementary Table S4. Reaction condition optimization: screening of aryldiazonium tetrafluoroborate ratio**

| Entry | <b>2a</b> (x equiv.) | Yield (%) | Ee (%) |
|-------|----------------------|-----------|--------|
| 1     | 1.0                  | 67        | >99    |
| 2     | 1.5 (48 h)           | 77        | >99    |
| 3     | 1.5 (72 h)           | 85        | >99    |
| 4     | 2.0                  | 71        | >99    |
| 5     | 2.5                  | 70        | >99    |
| 6     | 3.0                  | 57        | >99    |

[a] Reaction conditions: The metal and ligand were stirred for 1h in advance. Chamber A, **S9** (0.88 mmol), **S10** (0.8 mmol), tetradecane (1 mL), at 100 °C for 10 min; Chamber B, **1a** (0.2 mmol, 1.0 equiv.), **2a** (x mmol), TMSCN (0.3 mmol), CH<sub>3</sub>COOLi (0.5 mmol), Cu(OAc)<sub>2</sub> (10 mol%), L1 (12 mol%), DCM (2.5 mL), at 20 °C for 48 h. Yields were determined by <sup>1</sup>H NMR (1,3,5-Trimethoxybenzene was the internal standard). Enantiomeric excess (ee) was determined by ultra-high-performance liquid chromatography with a chiral stationary phase.

**Supplementary Table S5. Reaction condition optimization: screening of SO<sub>2</sub> source and SO<sub>2</sub> ratio**

| Entry            | <b>SO<sub>2</sub></b>                         | Yield (%) | Ee (%) |
|------------------|-----------------------------------------------|-----------|--------|
| 1                | Na <sub>2</sub> S <sub>2</sub> O <sub>5</sub> | 28        | >99    |
| 2                | K <sub>2</sub> S <sub>2</sub> O <sub>5</sub>  | 23        | >99    |
| 3                | Na <sub>2</sub> S <sub>2</sub> O <sub>4</sub> | 25        | >99    |
| 4                | DABSO                                         | 35        | >99    |
| 5                | Rongalite                                     | n.d.      | >99    |
| 6 <sup>[b]</sup> | TsCl                                          | trace     | /      |
| 7                | SOgen (3.5 equiv.)                            | 60        | >99    |
| 8                | SOgen (4.0 equiv.)                            | 85        | >99    |
| 9 <sup>[c]</sup> | SOgen (4.0 equiv.)                            | trace     | /      |

[a] Reaction conditions: The metal and ligand were stirred for 1h in advance. **SO<sub>2</sub> substitutes**, **1a** (0.2 mmol, 1.0 equiv.), **2a** (0.3 mmol), TMSCN (0.3 mmol), CH<sub>3</sub>COOLi (0.5 mmol), Cu(OAc)<sub>2</sub> (10 mol%), L1 (12 mol%), DCM (2.5 mL), at 20 °C for 72 h. Yields were determined by <sup>1</sup>H NMR (1,3,5-Trimethoxybenzene was the internal standard). Enantiomeric excess (ee) was determined by ultra-high-performance liquid chromatography with a chiral stationary phase. [b] TsCl was substituted for **2a** and **SOgen** at 20 °C for 72 h. [c] The metal and ligand were stirred for 1h in advance. Then, a mixture of **S9** (0.88 mmol), **S10** (0.8



mmol), tetradecane (1 mL), **1a** (0.2 mmol, 1.0 equiv.), **2a** (0.3 mmol), TMSCN (0.3 mmol), CH<sub>3</sub>COOLi (0.5 mmol), Cu(OAc)<sub>2</sub> (10 mol%), **L1** (12 mol%), and DCM (2.5 mL) was heated at 100 °C for 10 minutes followed by an additional 72 hours at 20 °C.

### Supplementary Table S6. Reaction condition optimization: screening of other nucleophile

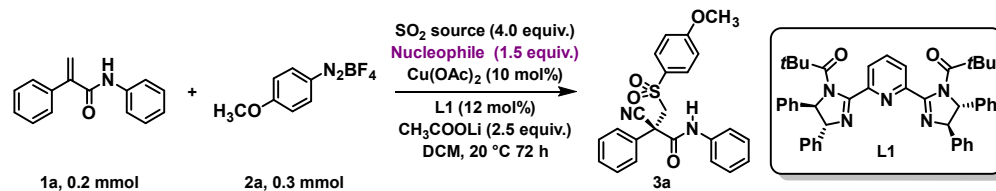

| Entry | Nucleophile        | Yield (%) | Ee (%) |
|-------|--------------------|-----------|--------|
| 1     | TMSCF <sub>3</sub> | n.d.      | /      |
| 2     | TMSCl              | n.d.      | /      |
| 3     |                    | n.d.      | /      |

[a] Reaction conditions: The metal and ligand were stirred for 1h in advance. Chamber A, **S9** (0.88 mmol), **S10** (0.8 mmol), tetradecane (1 mL), at 100 °C for 10 min; Chamber B, **1a** (0.2 mmol, 1.0 equiv.), **2a** (0.3 mmol), nucleophile (0.3 mmol), CH<sub>3</sub>COOLi (0.5 mmol), Cu(OAc)<sub>2</sub> (10 mol%), **L1** (12 mol%), DCM (2.5 mL), at 20 °C for 48 h. Yields were determined by <sup>1</sup>H NMR (1,3,5-Trimethoxybenzene was the internal standard). Enantiomeric excess (ee) was determined by ultra-high-performance liquid chromatography with a chiral stationary phase.

## 5. General procedure for the synthesis of compounds 3 and 5

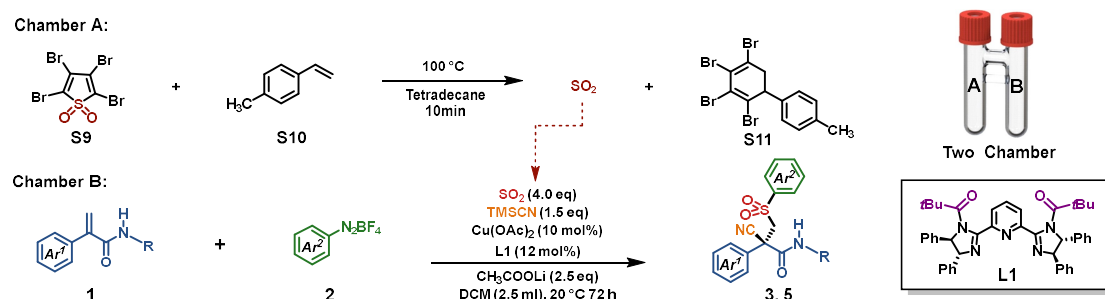

In the argon glovebox, Cu(OAc)<sub>2</sub> (3.6 mg, 10.0 mol%) and **L1** (16.5 mg 12.0 mol%) were dissolved in DCM (2.5 mL) in a dried sealed vial under argon atmosphere, and the mixture was stirred for 30 minutes. Then **1** (0.2 mmol, 1.0 equiv.), **2** (0.3 mmol, 1.5 equiv.), TMSCN (0.3 mmol, 1.5 equiv.), CH<sub>3</sub>COOLi (0.5 mmol, 2.5 equiv.) and the mixture were added to chamber B. Tetrabromothiophene S, S-dioxides (0.88 mmol, 380 mg) in tetradecane (1.0 mL) was added to chamber A, followed by addition of 4-methylphenylene (0.80 mmol, 105 μl). The chamber A was sealed and removed out of the glovebox and heated to 100 °C in heating mantle for 10 min. Then chamber B heated to 20 °C in low-temperature stirring reaction bath for 72 hours. After 72 hours, two chamber was cooled to room temperature. The filtrate was washed by ethyl acetate and H<sub>2</sub>O (15 mL×3), dried by Na<sub>2</sub>SO<sub>4</sub>, then concentrated and the residue was purified by flash column chromatography to give the desired product.

## 6. Characterization data of products 3 and 5

### (*R*)-2-cyano-3-((4-methoxyphenyl)sulfonyl)-*N*,2-diphenylpropanamide (3a)

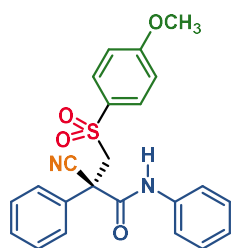

Prepared by the general procedure in a 0.2 mmol scale at the 20 °C for 72 h; Isolated as white solid using ethyl acetate/petroleum ether (1:3) as eluent (70 mg, 83% yield, >99% *ee*).  $[\alpha]_D^{19} = +47.0$  ( $c = 0.64$ ,  $\text{CHCl}_3$ ). According to the X-ray analysis, the “absolute stereochemistry” of the product is the *R* configuration.  **$^1\text{H NMR}$  (400 MHz,  $\text{DMSO-}d_6$ )**  $\delta$  10.00 (s, 1H), 7.76 (d,  $J = 8.8$  Hz, 2H), 7.53 – 7.48 (m, 4H), 7.44 – 7.36 (m, 3H), 7.33 – 7.29 (m, 2H), 7.14 – 7.07 (m, 3H), 4.71 (d,  $J = 14.8$  Hz, 1H), 4.52 (d,  $J = 14.8$  Hz, 1H), 3.82 (s, 3H);  **$^{13}\text{C NMR}$  (100 MHz,  $\text{DMSO-}d_6$ )**  $\delta$  163.4, 162.8, 137.8, 133.3, 131.4, 130.2, 129.1, 128.6, 126.4, 124.7, 121.0, 117.2, 114.5, 59.4, 55.8, 51.0; **HRMS**  $m/z$  calculated for  $\text{C}_{23}\text{H}_{20}\text{N}_2\text{O}_4\text{S}$   $[\text{M}+\text{Na}]^+$ : 443.1036, found: 443.1038; **HPLC** (Daicel Chirapak IC column, hexane/isopropanol = 45/55, flow 0.5 mL/min, detection at 214 nm) retention time = 45.28 min (minor) and 50.66 min (major).

### (*R*)-2-cyano-*N*,2-diphenyl-3-((3,4,5-trimethoxyphenyl)sulfonyl)propanamide (3b)

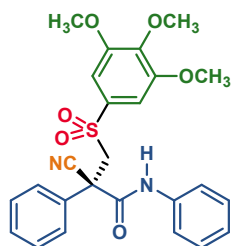

Prepared by the general procedure in a 0.2 mmol scale at the 20 °C for 72 h; Isolated as white solid using ethyl acetate/petroleum ether (1:3) as eluent (48 mg, 50% yield, >99% *ee*).  $[\alpha]_D^{16} = +31.8$  ( $c = 0.37$ ,  $\text{CHCl}_3$ );  **$^1\text{H NMR}$  (400 MHz,  $\text{DMSO-}d_6$ )**  $\delta$  9.99 (s, 1H), 7.50 – 7.47 (m, 4H), 7.39 – 7.29 (m, 5H), 7.14 – 7.09 (m, 1H), 7.01 (s, 2H), 4.74 – 4.66 (m, 2H), 3.81 (s, 6H), 3.69 (s, 3H);  **$^{13}\text{C NMR}$  (100 MHz,  $\text{DMSO-}d_6$ )**  $\delta$  162.8, 152.7, 141.6, 137.8, 134.3, 132.6, 129.1, 128.9, 128.7, 126.6, 124.7, 120.9, 117.3, 105.3, 60.1, 59.3, 56.1, 51.0; **HRMS**  $m/z$  calculated for  $\text{C}_{25}\text{H}_{24}\text{N}_2\text{O}_6\text{S}$   $[\text{M}+\text{Na}]^+$ : 503.1247, found: 503.1249; **HPLC** (Daicel Chirapak IC column, hexane/isopropanol = 70/30, flow 0.5 mL/min, detection at 214 nm) retention time = 73.61 min (minor) and 78.53 min (major).

### (*R*)-2-cyano-3-((4-phenoxyphenyl)sulfonyl)-*N*,2-diphenylpropanamide (3c)

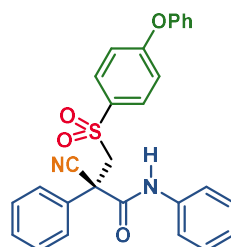

Prepared by the general procedure in a 0.2 mmol scale at the 20 °C for 72 h; Isolated as white solid using ethyl acetate/petroleum ether (1:3) as eluent (61 mg, 63% yield, >99% *ee*).  $[\alpha]_D^{19} = +33.3$  ( $c = 0.40$ ,  $\text{CHCl}_3$ );  **$^1\text{H NMR}$  (400 MHz,  $\text{DMSO-}d_6$ )**  $\delta$  10.02 (s, 1H), 7.80 (d,  $J = 9.2$  Hz, 2H), 7.53 – 7.46 (m, 6H), 7.44 – 7.38 (m, 3H), 7.34 – 7.25 (m, 3H), 7.15 – 7.09 (m, 3H), 7.06 (d,  $J = 9.2$  Hz, 2H), 4.74 (d,  $J = 15.2$  Hz, 1H), 4.60 (d,  $J =$

15.2 Hz, 1H);  $^{13}\text{C}$  NMR (100 MHz,  $\text{DMSO-}d_6$ )  $\delta$  162.7, 161.7, 154.6, 137.7, 133.5, 133.0, 130.6, 130.5, 129.13, 129.11, 128.6, 126.4, 125.1, 124.7, 121.0, 120.1, 117.5, 117.2, 59.2, 50.9; **HRMS**  $m/z$  calculated for  $\text{C}_{28}\text{H}_{22}\text{N}_2\text{O}_4\text{S}$   $[\text{M}+\text{Na}]^+$ : 505.1192, found: 505.1196; **HPLC** (Daicel Chirapak IC column, hexane/isopropanol = 55/45, flow 0.5 mL/min, detection at 214 nm) retention time = 49.37 min (minor) and 54.81 min (major).

### (*R*)-2-cyano-*N*,2-diphenyl-3-tosylpropanamide (3d)

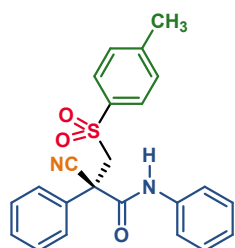

Prepared by the general procedure in a 0.2 mmol scale at the 20 °C for 72 h; Isolated as white solid using ethyl acetate/petroleum ether (1:3) as eluent (50 mg, 62% yield, 96% *ee*).  $[\alpha]_D^{19} = +36.9$  ( $c = 0.29$ ,  $\text{CHCl}_3$ );  $^1\text{H}$  NMR (400 MHz,  $\text{DMSO-}d_6$ )  $\delta$  10.02 (s, 1H), 7.72 (d,  $J = 8.4$  Hz, 2H), 7.53 – 7.47 (m, 4H), 7.43 – 7.37 (m, 5H), 7.34 – 7.29 (m, 2H), 7.14 – 7.10 (m, 1H), 4.72 (d,  $J = 14.8$  Hz, 1H), 4.54 (d,  $J = 14.8$  Hz, 1H), 2.36 (s, 3H);  $^{13}\text{C}$  NMR (100 MHz,  $\text{DMSO-}d_6$ )  $\delta$  162.7, 144.6, 137.7, 137.1, 133.2, 129.7, 129.1, 128.6, 127.9, 126.4, 124.7, 121.0, 117.2, 59.3, 50.9, 21.1; **HRMS**  $m/z$  calculated for:  $\text{C}_{23}\text{H}_{20}\text{N}_2\text{O}_3\text{S}$   $[\text{M}+\text{Na}]^+$ : 427.1087, found: 427.1088; **HPLC** (Daicel Chirapak IC column, hexane/isopropanol = 45/55, flow 0.5 mL/min, detection at 214 nm) retention time = 38.98 min (minor) and 44.59 min (major).

### (*R*)-2-cyano-3-((3,4-dimethylphenyl)sulfonyl)-*N*,2-diphenylpropanamide (3e)

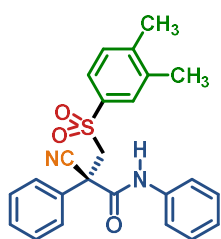

Prepared by the general procedure in a 0.2 mmol scale at the 20 °C for 72 h; Isolated as white solid using ethyl acetate/petroleum ether (1:3) as eluent (53 mg, 63% yield, >99% *ee*).  $[\alpha]_D^{19} = +65.8$  ( $c = 0.57$ ,  $\text{CHCl}_3$ );  $^1\text{H}$  NMR (400 MHz,  $\text{DMSO-}d_6$ )  $\delta$  9.96 (s, 1H), 7.55 (d,  $J = 8.0$ , 1H), 7.51 – 7.45 (m, 5H), 7.41-7.37 (m, 3H), 7.33-7.29 (m, 3H), 7.13 – 7.09 (m, 1H), 4.70 (d,  $J = 15.2$  Hz, 1H), 4.54 (d,  $J = 15.2$  Hz, 1H), 2.24 (s, 3H), 2.21 (s, 3H);  $^{13}\text{C}$  NMR (100 MHz,  $\text{DMSO-}d_6$ )  $\delta$  162.7, 143.4, 137.7, 137.6, 137.1, 133.1, 130.0, 129.1, 129.0, 128.6, 128.4, 126.4, 125.3, 124.6, 120.9, 117.2, 59.2, 51.0, 19.5, 19.3; **HRMS**  $m/z$  calculated for  $\text{C}_{24}\text{H}_{22}\text{N}_2\text{O}_3\text{S}$   $[\text{M}+\text{Na}]^+$ : 441.1243, found: 441.1245; **HPLC** (Daicel Chirapak IC column, hexane/isopropanol = 35/65, flow 0.5 mL/min, detection at 214 nm) retention time = 33.79 min (minor) and 37.53 min (major).

**(R)-3-((4-(tert-butyl)phenyl)sulfonyl)-2-cyano-N,2-diphenylpropanamide (3f)**

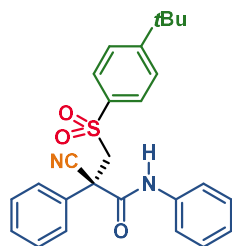

Prepared by the general procedure in a 0.2 mmol scale at the 20 °C for 72 h; Isolated as white solid using ethyl acetate/petroleum ether (1:3) as eluent (67 mg, 75% yield, >99% ee).  $[\alpha]_D^{18} = +19.7$  (c = 0.29, CHCl<sub>3</sub>); **<sup>1</sup>H NMR (400 MHz, DMSO-*d*<sub>6</sub>)** δ 10.01 (s, 1H), 7.73 (d, *J* = 8.4 Hz, 2H), 7.57 (d, *J* = 8.4 Hz, 2H), 7.50 – 7.47 (m, 4H), 7.39 – 7.29 (m, 5H), 7.14 – 7.09 (m, 1H), 4.72 (d, *J* = 15.2 Hz, 1H), 4.57 (d, *J* = 15.2 Hz, 1H), 1.28 (s, 9H); **<sup>13</sup>C NMR (100 MHz, DMSO-*d*<sub>6</sub>)** δ 162.7, 157.0, 137.8, 137.0, 132.9, 129.12, 129.05, 128.6, 127.7, 126.4, 126.1, 124.7, 121.0, 117.3, 59.2, 50.9, 35.0, 30.7; **HRMS *m/z*** calculated for C<sub>26</sub>H<sub>26</sub>N<sub>2</sub>O<sub>3</sub>S [M+Na]<sup>+</sup>: 469.1556, found: 469.1557; **HPLC** (Daicel Chirapak IC column, hexane/isopropanol = 70/30, flow 0.5 mL/min, detection at 214 nm) retention time = 77.25 min (minor) and 84.58 min (major).

**(R)-2-cyano-3-((4',5-dimethoxy-[1,1'-biphenyl]-2-yl)sulfonyl)-N,2-diphenylpropanamide (3g)**

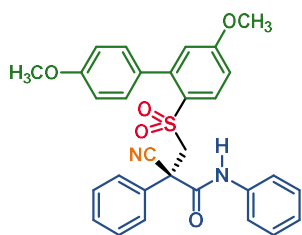

Prepared by the general procedure in a 0.2 mmol scale at the 20 °C for 72 h; Isolated as white solid using ethyl acetate/petroleum ether (1:3) as eluent (71 mg, 67% yield, >99% ee).  $[\alpha]_D^{16} = +28.0$  (c = 0.71, CHCl<sub>3</sub>); **<sup>1</sup>H NMR (400 MHz, DMSO-*d*<sub>6</sub>)** δ 10.02 (s, 1H), 7.78 (d, *J* = 8.8 Hz, 1H), 7.44 (d, *J* = 7.6 Hz, 2H), 7.40 – 7.28 (m, 9H), 7.13 – 7.09 (m, 1H), , 7.03 (dd, *J* = 8.8, 2.4 Hz, 1H), 6.99 (d, *J* = 8.8 Hz, 2H), 6.81 (d, *J* = 2.4 Hz, 1H), 4.24 (d, *J* = 14.8 Hz, 1H), 3.85 (s, 3H), 3.79 (s, 3H), 3.67 (d, *J* = 14.8 Hz, 1H); **<sup>13</sup>C NMR (100 MHz, DMSO-*d*<sub>6</sub>)** δ 162.6, 162.5, 159.2, 143.0, 137.7, 132.7, 131.5, 131.1, 130.5, 130.3, 129.2, 129.1, 128.6, 126.2, 124.7, 121.1, 118.2, 117.1, 113.3, 112.8, 59.3, 55.9, 55.2, 50.6; **HRMS *m/z*** calculated for : C<sub>30</sub>H<sub>26</sub>N<sub>2</sub>O<sub>5</sub>S [M+Na]<sup>+</sup>: 549.1455, found: 549.1456; **HPLC** (Daicel Chirapak IA column, hexane/isopropanol = 55/45, flow 0.5 mL/min, detection at 214 nm) retention time = 20.37 min (major) and 24.50 min (minor).

**(R)-3-([1,1'-biphenyl]-4-ylsulfonyl)-2-cyano-N,2-diphenylpropanamide (3h)**

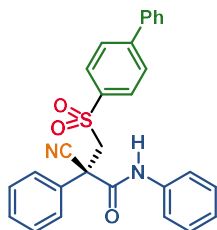

Prepared by the general procedure in a 0.2 mmol scale at the 20 °C for 72 h; Isolated as white solid using ethyl acetate/petroleum ether (1:3) as eluent (75 mg, 80% yield, >99% ee).  $[\alpha]_D^{19} = +33.5$  (c = 0.20, CHCl<sub>3</sub>); **<sup>1</sup>H NMR (400 MHz, DMSO-*d*<sub>6</sub>)** δ 10.07 (s, 1H), 7.88 (dd, *J* =

8.8 Hz, 18.4 Hz 4H), 7.71 (d,  $J = 7.2$  Hz, 2H), 7.55 – 7.44 (m, 7H), 7.42 – 7.36 (m, 3H), 7.32 – 7.28 (m, 2H), 7.13 – 7.09 (m, 1H), 4.80 (d,  $J = 15.2$  Hz, 1H), 4.65 (d,  $J = 15.2$  Hz, 1H);  $^{13}\text{C NMR}$  (100 MHz,  $\text{DMSO-}d_6$ )  $\delta$  162.7, 145.4, 138.6, 138.3, 137.7, 133.0, 129.2, 129.1, 128.8, 128.6, 128.5, 127.4, 127.2, 126.4, 124.7, 121.0, 117.3, 59.3, 50.9; **HRMS**  $m/z$  calculated for :  $\text{C}_{28}\text{H}_{22}\text{N}_2\text{O}_3\text{S}$   $[\text{M}+\text{Na}]^+$ : 489.1243, found: 489.1244; **HPLC** (Daicel Chirapak IA column, hexane/isopropanol = 55/45, flow 0.5 mL/min, detection at 214 nm) retention time = 29.78 min (minor) and 32.39 min (major).

**(R)-2-cyano-3-((4-fluorophenyl)sulfonyl)-N,2-diphenylpropanamide (3i)**

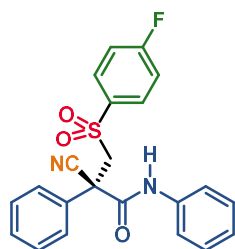

Prepared by the general procedure in a 0.2 mmol scale at the 20 °C for 72 h; Isolated as white solid using ethyl acetate/petroleum ether (1:3) as eluent (53 mg, 65% yield, >99% ee).  $[\alpha]_D^{18} = +69.6$  ( $c = 0.73$ ,  $\text{CHCl}_3$ );  $^1\text{H NMR}$  (400 MHz,  $\text{DMSO-}d_6$ )  $\delta$  10.06 (s, 1H), 7.92 – 7.87 (m, 2H), 7.52 – 7.49 (m, 4H), 7.44 – 7.39 (m, 5H), 7.34 – 7.30 (m, 2H), 7.15 – 7.10 (m, 1H), 4.77 (d,  $J = 15.2$  Hz, 1H), 4.66 (d,  $J = 15.2$  Hz, 1H);  $^{13}\text{C NMR}$  (100 MHz,  $\text{DMSO-}d_6$ )  $\delta$  165.1 (d,  $J = 251$ ), 162.7, 137.7, 136.2 (d,  $J = 3$ ), 132.9, 131.2 (d,  $J = 10$ ), 129.2, 129.1, 128.6, 126.4, 124.7, 121.0, 117.2, 116.4 (d,  $J = 23$ ), 59.2, 50.9;  $^{19}\text{F NMR}$  (376 Hz,  $\text{DMSO-}d_6$ )  $\delta$  -104.5; **HRMS**  $m/z$  calculated for :  $\text{C}_{22}\text{H}_{17}\text{FN}_2\text{O}_3\text{S}$   $[\text{M}+\text{Na}]^+$ : 431.0836, found: 431.0838; **HPLC** (Daicel Chirapak IC column, hexane/isopropanol = 55/45, flow 0.5 mL/min, detection at 214 nm) retention time = 30.91 min (minor) and 35.01 min (major).

**(R)-3-((4-chlorophenyl)sulfonyl)-2-cyano-N,2-diphenylpropanamide (3j)**

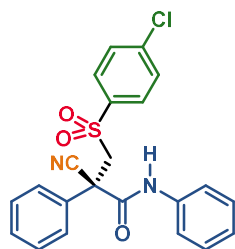

Prepared by the general procedure in a 0.2 mmol scale at the 20 °C for 72 h; Isolated as white solid using ethyl acetate/petroleum ether (1:3) as eluent (56 mg, 66% yield, >99% ee).  $[\alpha]_D^{18} = +50.8$  ( $c = 0.44$ ,  $\text{CHCl}_3$ );  $^1\text{H NMR}$  (400 MHz,  $\text{DMSO-}d_6$ )  $\delta$  10.06 (s, 1H), 7.82 (d,  $J = 8.4$  Hz, 2H), 7.65 (d,  $J = 8.4$  Hz, 2H), 7.51-7.47 (m, 4H), 7.42 – 7.37 (m, 3H), 7.34-7.30 (m, 2H), 7.15 – 7.10 (m, 1H), 4.78 (d,  $J = 15.2$  Hz, 1H), 4.67 (d,  $J = 15.2$  Hz, 1H);  $^{13}\text{C NMR}$  (100 MHz,  $\text{DMSO-}d_6$ )  $\delta$  162.6, 139.1, 138.6, 137.7, 132.9, 129.8, 129.4, 129.17, 129.12, 128.6, 126.4, 124.7, 121.0, 117.1, 59.1, 50.8; **HRMS**  $m/z$  calculated for  $\text{C}_{22}\text{H}_{17}\text{ClN}_2\text{O}_3\text{S}$   $[\text{M}+\text{Na}]^+$ : 447.0541, found: 447.0541; **HPLC** (Daicel Chirapak IC column, hexane/isopropanol = 45/55, flow 0.5 mL/min, detection at 214 nm) retention time = 27.06 min (minor) and 29.44 min (major).

### (R)-3-((4-bromophenyl)sulfonyl)-2-cyano-N,2-diphenylpropanamide (3k)

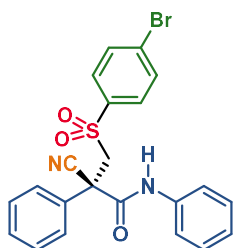

Prepared by the general procedure in a 0.2 mmol scale at the 20 °C for 72 h; Isolated as white solid using ethyl acetate/petroleum ether (1:3) as eluent (60 mg, 64% yield, >99% ee).  $^{[a]_D^{19}} = +69.0$  (c = 0.58, CHCl<sub>3</sub>); **<sup>1</sup>H NMR (400 MHz, DMSO-*d*<sub>6</sub>)** δ 10.07 (s, 1H), 7.81 – 7.74 (m, 4H), 7.52-7.47 (m, 4H), 7.42-7.37 (m, 3H), 7.34-7.30 (m, 2H), 7.14 – 7.10 (m, 1H), 4.78 (d, *J* = 15.2 Hz, 1H), 4.66 (d, *J* = 15.2 Hz, 1H); **<sup>13</sup>C NMR (100 MHz, DMSO-*d*<sub>6</sub>)** δ 162.6, 139.0, 137.7, 132.9, 132.3, 129.9, 129.2, 129.1, 128.6, 128.3, 126.4, 124.7, 121.0, 117.1, 59.1, 50.8; **HRMS** *m/z* calculated for C<sub>22</sub>H<sub>17</sub>BrN<sub>2</sub>O<sub>3</sub>S [M+Na]<sup>+</sup>: 491.0035, found: 491.0041; **HPLC** (Daicel Chirapak IC column, hexane/isopropanol = 55/45, flow 0.5 mL/min, detection at 214 nm) retention time = 35.52 min (minor) and 38.99 min (major).

### (R)-3-((2-bromophenyl)sulfonyl)-2-cyano-N,2-diphenylpropanamide (3l)

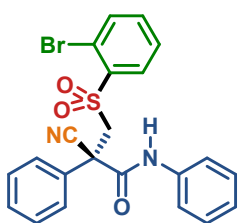

Prepared by the general procedure in a 0.2 mmol scale at the 20 °C for 72 h; Isolated as white solid using ethyl acetate/petroleum ether (1:3) as eluent (59 mg, 63% yield, >99% ee).  $^{[a]_D^{16}} = +3.6$  (c = 0.41, CHCl<sub>3</sub>); **<sup>1</sup>H NMR (400 MHz, DMSO-*d*<sub>6</sub>)** δ 10.2 (s, 1H), 7.84 (dd, *J* = 7.6, 1.6 Hz, 1H), 7.74 (dd, *J* = 7.6, 1.6 Hz, 1H), 7.55 (td, *J* = 7.6, 1.6 Hz, 1H), 7.51 – 7.46 (m, 5H), 7.37 – 7.29 (m, 5H), 7.14 – 7.10 (m, 1H), 4.86 – 4.76 (m, 2H); **<sup>13</sup>C NMR (100 MHz, DMSO-*d*<sub>6</sub>)** δ 162.7, 139.0, 137.8, 135.5, 135.3, 132.2, 131.2, 129.4, 129.2, 128.7, 128.4, 126.4, 124.8, 121.1, 120.0, 117.3, 58.6, 50.9; **HRMS** *m/z* calculated for : C<sub>22</sub>H<sub>17</sub>BrN<sub>2</sub>O<sub>3</sub>S [M+Na]<sup>+</sup>: 491.0035, found: 491.0039; **HPLC** (Daicel Chirapak IA column, hexane/isopropanol = 85/15, flow 0.5 mL/min, detection at 214 nm) retention time = 58.26 min (major) and 66.27 min (minor).

### (R)-2-cyano-3-((4-iodophenyl)sulfonyl)-N,2-diphenylpropanamide (3m)

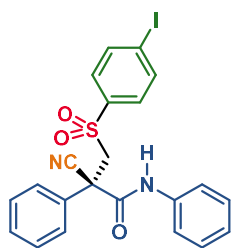

Prepared by the general procedure in a 0.2 mmol scale at the 20 °C for 72 h; Isolated as white solid using ethyl acetate/petroleum ether (1:3) as eluent (62 mg, 60% yield, >99% ee).  $^{[a]_D^{19}} = +65.6$  (c = 0.75, CHCl<sub>3</sub>); **<sup>1</sup>H NMR (400 MHz, DMSO-*d*<sub>6</sub>)** δ 10.05 (s, 1H), 7.97 (d, *J* = 8.8 Hz, 2H), 7.57 (d, *J* = 8.4 Hz, 2H), 7.51 – 7.46 (m, 4H), 7.42 – 7.37 (m, 3H), 7.34-7.30 (m, 2H), 7.14 – 7.10 (m, 1H), 4.76 (d, *J* = 15.2 Hz, 1H), 4.63 (d, *J* = 15.2 Hz, 1H); **<sup>13</sup>C NMR (100 MHz, DMSO-*d*<sub>6</sub>)** δ 162.6, 139.4, 138.1, 137.7, 132.9, 129.4, 129.1,

128.7, 126.4, 124.7, 121.0, 117.1, 103.0, 59.1, 50.8; **HRMS**  $m/z$  calculated for  $C_{22}H_{17}IN_2O_3S$   $[M+Na]^+$ : 538.9897, found: 538.9900; **HPLC** (Daicel Chirapak IC column, hexane/isopropanol = 55/45, flow 0.5 mL/min, detection at 214 nm) retention time = 40.11 min (minor) and 43.96 min (major).

**(R)-3-((4-chloro-2-iodophenyl)sulfonyl)-2-cyano-N,2-diphenylpropanamide (3n)**

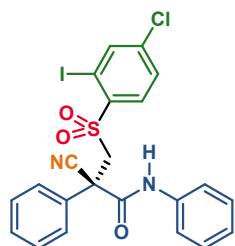

Prepared by the general procedure in a 0.2 mmol scale at the 20 °C for 72 h; Isolated as white solid using ethyl acetate/petroleum ether (1:3) as eluent (47 mg, 43% yield, 99% ee).  $[\alpha]_D^{19} = +21.1$  ( $c = 0.37$ ,  $CHCl_3$ );  **$^1H$  NMR (400 MHz, DMSO- $d_6$ )**  $\delta$  10.18 (s, 1H), 8.19 (d,  $J = 2.0$  Hz, 1H), 7.65 (d,  $J = 8.4$  Hz, 1H), 7.54 (dd,  $J = 8.4, 2.0$  Hz, 1H), 7.49 – 7.44 (m, 4H), 7.37 – 7.29 (m, 5H), 7.14 – 7.10 (m, 1H), 4.86 – 4.76 (m, 2H);  **$^{13}C$  NMR (100 MHz, DMSO- $d_6$ )**  $\delta$  162.6, 141.0, 140.9, 138.7, 137.6, 132.1, 132.0, 129.2, 129.1, 128.6, 126.3, 124.8, 121.0, 117.1, 96.2, 57.8, 50.8; **HRMS**  $m/z$  calculated for :  $C_{22}H_{16}ClIN_2O_3S$   $[M+H]^+$ : 572.9507, found: 572.9507; **HPLC** (Daicel Chirapak IC column, hexane/isopropanol = 35/65, flow 0.5 mL/min, detection at 214 nm) retention time = 27.26 min (minor) and 30.68 min (major).

**(R)-3-(((3-chloro-4-((3-fluorobenzyl)oxy)phenyl)sulfonyl)-2-cyano-N,2-diphenylpropanamide (3o)**

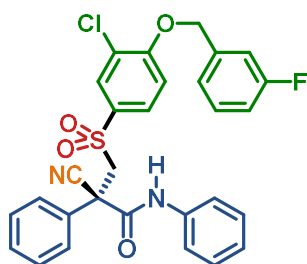

Prepared by the general procedure in a 0.2 mmol scale at the 20 °C for 72 h; Isolated as white solid using ethyl acetate/petroleum ether (1:3) as eluent (77 mg, 70% yield, >99% ee).  $[\alpha]_D^{18} = +30.7$  ( $c = 0.48$ ,  $CHCl_3$ );  **$^1H$  NMR (400 MHz, DMSO- $d_6$ )**  $\delta$  10.02 (s, 1H), 7.76 – 7.74 (m, 2H), 7.52 – 7.46 (m, 5H), 7.39 – 7.29 (m, 8H), 7.21 (td,  $J = 8.4, 2.4$  Hz, 1H), 7.13 – 7.09 (m, 1H), 5.31 (s, 2H), 4.79 – 4.69 (m, 2H);  **$^{13}C$  NMR (100 MHz, DMSO- $d_6$ )**  $\delta$  162.7, 162.2 (d,  $J = 243$  Hz), 157.5, 138.6 (d,  $J = 7$  Hz), 137.7, 132.8, 132.4, 130.7 (d,  $J = 8$  Hz), 129.7, 129.2, 129.0, 128.9, 128.6, 126.5, 124.7, 123.4 (d,  $J = 3$  Hz), 122.1, 120.9, 117.2, 115.0 (d,  $J = 20$  Hz), 114.2 (d,  $J = 22$  Hz), 114.0, 69.7, 59.2, 51.0;  **$^{19}F$  NMR (376 Hz, DMSO- $d_6$ )**  $\delta$  -112.8; **HRMS**  $m/z$  calculated for :  $C_{29}H_{22}ClFN_2O_4S$   $[M+Na]^+$ : 571.0865, found: 571.0864; **HPLC** (Daicel Chirapak IB column, hexane/isopropanol = 55/45, flow 0.5 mL/min, detection at 214 nm) retention time = 40.05 min (minor) and 44.73 min (major).

### Ethyl (R)-4-((2-cyano-3-oxo-2-phenyl-3-(phenylamino)propyl)sulfonyl)benzoate (3p)

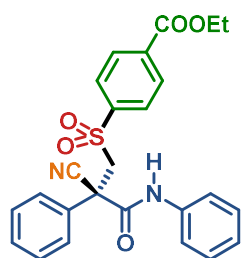

Prepared by the general procedure in a 0.2 mmol scale at the 20 °C for 72 h; Isolated as white solid using ethyl acetate/petroleum ether (1:3) as eluent (40 mg, 43% yield, 99% ee).  $[\alpha]_D^{15} = +52.7$  ( $c = 0.89$ ,  $\text{CHCl}_3$ );  **$^1\text{H NMR}$  (400 MHz, DMSO- $d_6$ )**  $\delta$  10.06 (s, 1H), 8.08 (d,  $J = 8.8$  Hz, 2H), 7.96 (d,  $J = 8.8$  Hz, 2H), 7.52 – 7.45 (m, 4H), 7.40 – 7.36 (m, 3H), 7.32 – 7.28 (m, 2H), 7.13 – 7.09 (m, 1H), 4.83 (d,  $J = 15.2$  Hz, 2H), 4.74 (d,  $J = 15.2$  Hz, 1H), 4.35 (q,  $J = 7.2$  Hz, 2H), 1.34 (t,  $J = 7.2$  Hz, 3H).  **$^{13}\text{C NMR}$  (100 MHz, DMSO- $d_6$ )**  $\delta$  164.6, 162.6, 143.5, 137.7, 134.3, 132.9, 129.9, 129.3, 129.2, 128.7, 128.4, 126.5, 124.8, 120.9, 117.2, 61.6, 59.0, 50.9, 14.1. **HRMS**  $m/z$  calculated for:  $\text{C}_{25}\text{H}_{22}\text{N}_2\text{O}_5\text{S}$   $[\text{M}+\text{H}]^+$ : 463.1322, found: 463.1320; **HPLC** (Daicel Chirapak IC column, hexane/isopropanol = 70/30, flow 1.0 mL/min, detection at 210 nm) retention time = 27.56 min (minor) and 31.08 min (major).

### (R)-2-cyano-N,2-diphenyl-3-((4-(trifluoromethyl)phenyl)sulfonyl)propanamide (3q)

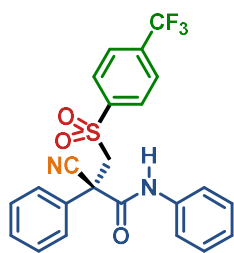

Prepared by the general procedure in a 0.2 mmol scale at the 20 °C for 72 h; Isolated as white solid using ethyl acetate/petroleum ether (1:3) as eluent (32 mg, 35% yield, 98% ee).  $[\alpha]_D^{15} = +10.1$  ( $c = 1.39$ ,  $\text{CHCl}_3$ );  **$^1\text{H NMR}$  (400 MHz, DMSO- $d_6$ )**  $\delta$  10.09 (s, 1H), 8.02 (d,  $J = 8.0$  Hz, 2H), 7.94 (d,  $J = 8.0$  Hz, 2H), 7.50 – 7.46 (m, 4H), 7.38 – 7.29 (m, 5H), 7.14 – 7.10 (m, 1H), 4.81 (dd,  $J = 15.2$  Hz, 2H).  **$^{13}\text{C NMR}$  (101 MHz, DMSO- $d_6$ )**  $\delta$  162.6, 143.6, 137.7, 133.4 (q,  $J = 32.2$  Hz), 132.6, 129.2, 129.1, 129.0, 128.7, 126.5, 126.4 (q,  $J = 3.7$  Hz), 124.8, 120.9, 117.1, 59.0, 50.8.  **$^{19}\text{F NMR}$  (376 Hz, DMSO- $d_6$ )**  $\delta$  -61.8; **HRMS**  $m/z$  calculated for:  $\text{C}_{23}\text{H}_{17}\text{F}_3\text{N}_2\text{O}_3\text{S}$   $[\text{M}+\text{H}]^+$ : 459.0985, found: 459.0988; **HPLC** (Daicel Chirapak IA column, hexane/isopropanol = 70/30, flow 0.5 mL/min, detection at 210 nm) retention time = 24.68 min (minor) and 25.93 min (major).

### (R)-2-cyano-2-(3-methoxyphenyl)-3-((4-methoxyphenyl)sulfonyl)-N-phenylpropanamide (3r)

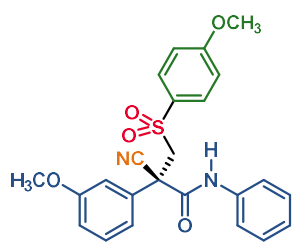

Prepared by the general procedure in a 0.2 mmol scale at the 20 °C for 72 h; Isolated as white solid using ethyl acetate/petroleum ether (1:3) as eluent (68 mg, 75% yield, >99% ee).  $[\alpha]_D^{18} = +30.6$  ( $c = 0.26$ ,  $\text{CHCl}_3$ );  **$^1\text{H NMR}$  (400 MHz, DMSO- $d_6$ )**  $\delta$  9.98 (s, 1H), 7.72 (d,  $J = 8.8$  Hz, 2H), 7.48 (d,  $J = 7.2$  Hz,



2H), 7.32 (td,  $J = 8.0, 3.2$  Hz, 3H), 7.14 – 7.04 (m, 4H), 6.99 – 6.93 (m, 2H), 4.67 (d,  $J = 15.2$  Hz, 1H), 4.55 (d,  $J = 15.2$  Hz, 1H), 3.81 (s, 3H), 3.73 (s, 3H);  $^{13}\text{C}$  NMR (100 MHz, DMSO- $d_6$ )  $\delta$  163.4, 162.7, 159.5, 137.8, 134.3, 131.3, 130.3, 130.2, 128.6, 124.7, 121.0, 118.5, 117.2, 114.4, 114.3, 112.6, 59.2, 55.8, 55.3, 50.9; HRMS  $m/z$  calculated for :  $\text{C}_{24}\text{H}_{22}\text{N}_2\text{O}_5\text{S}$   $[\text{M}+\text{Na}]^+$ : 473.1142, found: 473.1142; HPLC (Daicel Chirapak IA column, hexane/isopropanol = 80/20, flow 0.5 mL/min, detection at 214 nm) retention time = 66.19 min (major) and 71.48 min (minor).

**(R)-2-(3-(tert-butyl)phenyl)-2-cyano-3-((4-methoxyphenyl)sulfonyl)-N-phenylpropanamide (3s)**

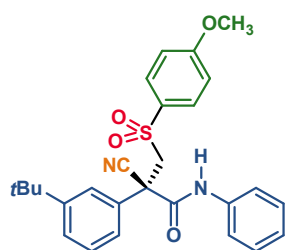

Prepared by the general procedure in a 0.2 mmol scale at the 20 °C for 72 h; Isolated as white solid using ethyl acetate/petroleum ether (1:3) as eluent (58 mg, 61% yield, >99% ee).  $[\alpha]_D^{19} = +57.9$  ( $c = 0.49$ ,  $\text{CHCl}_3$ );  $^1\text{H}$  NMR (400 MHz, DMSO- $d_6$ )  $\delta$  10.02 (s, 1H), 7.73 (d,  $J = 8.8$  Hz, 2H), 7.51 (s, 1H), 7.46 (d,  $J = 8.0$  Hz, 2H), 7.42 – 7.39 (m, 1H), 7.34 – 7.30 (m, 4H), 7.14 – 7.10 (m, 1H), 7.06 (d,  $J = 8.8$  Hz, 2H), 4.69 (d,  $J = 14.8$  Hz, 1H), 4.57 (d,  $J = 14.8$  Hz, 1H), 3.81 (s, 3H), 1.24 (s, 9H);  $^{13}\text{C}$  NMR (100 MHz, DMSO- $d_6$ )  $\delta$  163.4, 162.9, 151.6, 137.7, 132.9, 131.4, 130.2, 128.8, 128.6, 126.1, 124.7, 123.6, 123.1, 121.2, 117.4, 114.4, 59.6, 55.8, 51.2, 34.7, 31.0; HRMS  $m/z$  calculated for :  $\text{C}_{27}\text{H}_{28}\text{N}_2\text{O}_4\text{S}$   $[\text{M}+\text{Na}]^+$ : 499.1662, found: 499.1665; HPLC (Daicel Chirapak IA column, hexane/isopropanol = 55/45, flow 0.5 mL/min, detection at 214 nm) retention time = 12.29 min (major) and 13.91 min (minor).

**(R)-2-cyano-2-(3-isopropylphenyl)-3-((4-methoxyphenyl)sulfonyl)-N-phenylpropanamide (3t)**

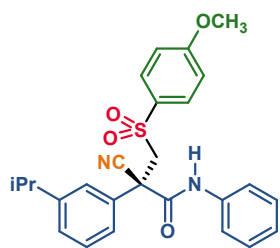

Prepared by the general procedure in a 0.2 mmol scale at the 20 °C for 72 h; Isolated as white solid using ethyl acetate/petroleum ether (1:3) as eluent (60 mg, 65% yield, >99% ee).  $[\alpha]_D^{18} = +64.3$  ( $c = 0.85$ ,  $\text{CHCl}_3$ );  $^1\text{H}$  NMR (400 MHz, DMSO- $d_6$ )  $\delta$  10.00 (s, 1H), 7.73 (d,  $J = 8.8$  Hz, 2H), 7.47 (d,  $J = 7.6$  Hz, 2H), 7.37 (s, 1H), 7.34 – 7.24 (m, 5H), 7.14 – 7.10 (m, 1H), 7.06 (d,  $J = 8.8$  Hz, 2H), 4.69 (d,  $J = 15.2$  Hz, 1H), 4.54 (d,  $J = 15.2$  Hz, 1H), 3.81 (s, 3H), 2.86 (hept,  $J = 6.8$  Hz, 1H), 1.17 (d,  $J = 7.2$  Hz, 6H);  $^{13}\text{C}$  NMR (100 MHz, DMSO- $d_6$ )  $\delta$  163.4, 162.8, 149.3, 137.8, 133.1, 131.4, 130.2, 129.1, 128.6, 127.0, 124.7, 124.5, 123.9, 121.1, 117.3, 114.4, 59.5, 55.8, 51.0, 33.4, 23.6; HRMS  $m/z$  calculated for :  $\text{C}_{26}\text{H}_{26}\text{N}_2\text{O}_4\text{S}$   $[\text{M}+\text{Na}]^+$ : 485.1505, found:

485.1506; **HPLC** (Daicel Chirapak IA column, hexane/isopropanol = 55/45, flow 0.5 mL/min, detection at 214 nm) retention time = 13.37 min (major) and 15.09 min (minor).

**(R)-2-cyano-3-((4-methoxyphenyl)sulfonyl)-N-phenyl-2-(p-tolyl)propenamide (3u)**

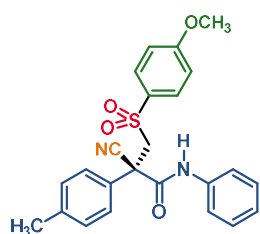

Prepared by the general procedure in a 0.2 mmol scale at the 20 °C for 72 h; Isolated as white solid using ethyl acetate/petroleum ether (1:3) as eluent (46 mg, 53% yield, >99% ee).  $[\alpha]_D^{19} = +32.6$  (c = 0.28, CHCl<sub>3</sub>); **<sup>1</sup>H NMR (400 MHz, DMSO-*d*<sub>6</sub>)** δ 9.95 (s, 1H), 7.72 (d, *J* = 8.8 Hz, 2H), 7.47 (d, *J* = 7.6 Hz, 2H), 7.36 (d, *J* = 8.0 Hz, 2H), 7.33 – 7.29 (m, 2H), 7.18 (d, *J* = 8.0 Hz, 2H), 7.13 – 7.09 (m, 1H), 7.06 (d, *J* = 8.8 Hz, 2H), 4.66 (d, *J* = 15.2 Hz, 1H), 4.49 (d, *J* = 15.2 Hz, 1H), 3.81 (s, 3H), 2.27 (s, 3H); **<sup>13</sup>C NMR (100 MHz, DMSO-*d*<sub>6</sub>)** δ 163.4, 162.9, 138.7, 137.8, 131.4, 130.21, 130.18, 129.6, 128.6, 126.2, 124.6, 121.0, 117.3, 114.4, 59.4, 55.8, 50.7, 20.5; **HRMS *m/z*** calculated for : C<sub>24</sub>H<sub>22</sub>N<sub>2</sub>O<sub>4</sub>S [M+Na]<sup>+</sup>: 457.1192, found: 457.1192; **HPLC** (Daicel Chirapak IA column, hexane/isopropanol = 55/45, flow 0.5 mL/min, detection at 214 nm) retention time = 34.34 min (major) and 40.55 min (minor).

**(R)-2-cyano-3-((4-methoxyphenyl)sulfonyl)-N-phenyl-2-(4-(trimethylsilyl)phenyl)propenamide (3v)**

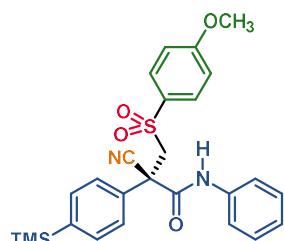

Prepared by the general procedure in a 0.2 mmol scale at the 20 °C for 72 h; Isolated as white solid using ethyl acetate/petroleum ether (1:3) as eluent (66 mg, 67% yield, >99% ee).  $[\alpha]_D^{16} = +3.3$  (c = 0.31, CHCl<sub>3</sub>); **<sup>1</sup>H NMR (400 MHz, DMSO-*d*<sub>6</sub>)** δ 9.99 (s, 1H), 7.72 (d, *J* = 8.8 Hz, 2H), 7.53 – 7.46 (m, 6H), 7.33 – 7.29 (m, 2H), 7.14 – 7.09 (m, 1H), 7.04 (d, *J* = 8.8 Hz, 2H), 4.68 (d, *J* = 15.2 Hz, 1H), 4.55 (d, *J* = 15.2 Hz, 1H), 3.81 (s, 3H), 0.23 (s, 9H); **<sup>13</sup>C NMR (100 MHz, DMSO-*d*<sub>6</sub>)** 163.3, 162.7, 141.2, 137.8, 133.9, 133.6, 131.3, 130.2, 128.6, 125.7, 124.7, 120.9, 117.1, 114.4, 59.3, 55.8, 51.0, -1.3; **HRMS *m/z*** calculated for : C<sub>26</sub>H<sub>28</sub>N<sub>2</sub>O<sub>4</sub>SSi [M+Na]<sup>+</sup>: 515.1431, found: 515.1432; **HPLC** (Daicel Chirapak IA column, hexane/isopropanol = 55/45, flow 0.5 mL/min, detection at 214 nm) retention time = 16.67 min (major) and 18.65 min (minor).

**(R)-2-cyano-3-((4-methoxyphenyl)sulfonyl)-2-(naphthalen-2-yl)-N-phenylpropanamide (3w)**

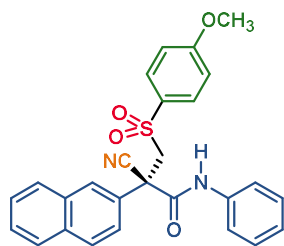

Prepared by the general procedure in a 0.2 mmol scale at the 20 °C for 72 h; Isolated as white solid using ethyl acetate/petroleum ether (1:3) as eluent (66 mg, 70% yield, >99% ee).  $[\alpha]_D^{18} = +66.6$  ( $c = 0.49$ ,  $\text{CHCl}_3$ );  **$^1\text{H NMR}$  (400 MHz,  $\text{DMSO-}d_6$ )**  $\delta$  10.05 (s, 1H), 8.06 (d,  $J = 2.4$  Hz, 1H), 7.96 – 7.86 (m, 3H), 7.66 (d,  $J = 8.8$  Hz, 2H), 7.60 – 7.56 (m, 2H), 7.51 – 7.46 (m, 3H), 7.32 – 7.28 (m, 2H), 7.13 – 7.08 (m, 1H), 6.88 (d,  $J = 8.8$  Hz, 2H), 4.76 (d,  $J = 15.2$  Hz, 1H), 4.66 (d,  $J = 15.2$  Hz, 1H), 3.71 (s, 3H);  **$^{13}\text{C NMR}$  (100 MHz,  $\text{DMSO-}d_6$ )**  $\delta$  163.2, 162.8, 137.8, 132.7, 132.4, 131.1, 130.1, 130.0, 128.9, 128.6, 128.2, 127.4, 127.2, 127.0, 126.3, 124.7, 123.3, 121.0, 117.2, 114.2, 59.2, 55.6, 51.0; **HRMS**  $m/z$  calculated for :  $\text{C}_{27}\text{H}_{22}\text{N}_2\text{O}_4\text{S}$   $[\text{M}+\text{Na}]^+$ : 493.1192, found: 493.1193; **HPLC** (Daicel Chirapak IA column, hexane/isopropanol = 55/45, flow 0.5 mL/min, detection at 214 nm) retention time = 27.61 min (major) and 31.90 min (minor).

**(R)-2-cyano-2-(4-fluorophenyl)-3-((4-methoxyphenyl)sulfonyl)-N-phenylpropanamide (3x)**

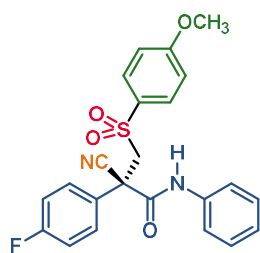

Prepared by the general procedure in a 0.2 mmol scale at the 20 °C for 72 h; Isolated as white solid using ethyl acetate/petroleum ether (1:3) as eluent (55 mg, 63% yield, >99% ee).  $[\alpha]_D^{19} = +50.1$  ( $c = 0.41$ ,  $\text{CHCl}_3$ );  **$^1\text{H NMR}$  (400 MHz,  $\text{DMSO-}d_6$ )**  $\delta$  10.03 (s, 1H), 7.71 (d,  $J = 8.8$  Hz, 2H), 7.54 – 7.46 (m, 4H), 7.34 – 7.30 (m, 2H), 7.24 – 7.20 (m, 2H), 7.14 – 7.10 (m, 1H), 7.06 (d,  $J = 9.2$  Hz, 2H), 4.67 (d,  $J = 15.2$  Hz, 1H), 4.57 (d,  $J = 15.2$  Hz, 1H), 3.82 (s, 3H);  **$^{13}\text{C NMR}$  (100 MHz,  $\text{DMSO-}d_6$ )**  $\delta$  163.4, 162.7, 162.2 (d,  $J = 245$  Hz), 137.7, 131.3, 130.2, 129.1 (d,  $J = 4$  Hz), 128.9 (d,  $J = 9$  Hz), 128.6, 124.8, 121.0, 117.2, 115.9 (d,  $J = 22$  Hz), 114.4, 59.3, 55.8, 50.4;  **$^{19}\text{F NMR}$  (376 Hz,  $\text{DMSO-}d_6$ )**  $\delta$  -112.9; **HRMS**  $m/z$  calculated for :  $\text{C}_{23}\text{H}_{19}\text{FN}_2\text{O}_4\text{S}$   $[\text{M}+\text{Na}]^+$ : 461.0942, found: 461.0941; **HPLC** (Daicel Chirapak IA column, hexane/isopropanol = 55/45, flow 0.5 mL/min, detection at 214 nm) retention time = 28.15 min (major) and 31.98 min (minor).

**(R)-2-(4-chlorophenyl)-2-cyano-3-((4-methoxyphenyl)sulfonyl)-N-phenylpropanamide (3y)**

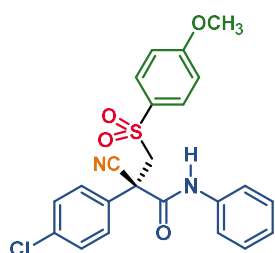

Prepared by the general procedure in a 0.2 mmol scale at the 20 °C for 72 h; Isolated as white solid using ethyl acetate/petroleum ether (1:3) as eluent (57 mg, 63% yield, >99% ee).  $[\alpha]_D^{16} = +90.8$  ( $c = 0.90$ ,  $\text{CHCl}_3$ );  **$^1\text{H NMR}$  (400 MHz,  $\text{DMSO-}d_6$ )**  $\delta$  10.06 (s, 1H), 7.67 (d,  $J = 8.8$  Hz, 2H), 7.48 – 7.41 (m, 6H),

7.34 – 7.30 (m, 2H), 7.15 – 7.10 (m, 1H), 7.04 (d,  $J=9.2$  Hz, 2H), 4.66 (d,  $J = 15.2$  Hz, 1H), 4.59 (d,  $J = 15.2$  Hz, 1H), 3.82 (s, 3H);  $^{13}\text{C NMR}$  (100 MHz,  $\text{DMSO-}d_6$ )  $\delta$  163.4, 162.4, 137.7, 134.0, 131.6, 131.2, 130.1, 128.9, 128.7, 128.6, 124.8, 121.0, 117.0, 114.4, 59.1, 55.8, 50.4; **HRMS**  $m/z$  calculated for :  $\text{C}_{23}\text{H}_{19}\text{ClN}_2\text{O}_4\text{S}$   $[\text{M}+\text{Na}]^+$ : 477.0646, found: 477.0647; **HPLC** (Daicel Chirapak IA column, hexane/isopropanol = 35/65, flow 0.5 mL/min, detection at 214 nm) retention time = 25.10 min (major) and 30.88 min (minor).

**(R)-2-cyano-3-((4-methoxyphenyl)sulfonyl)-N-phenyl-2-(4-(trifluoromethyl)phenyl)propenamide (3z)**

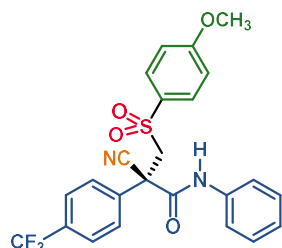

Prepared by the general procedure in a 0.2 mmol scale at the 20 °C for 72 h; Isolated as white solid using ethyl acetate/petroleum ether (1:3) as eluent (62 mg, 63% yield, >99% ee).  $[\alpha]_D^{19} = +61.1$  ( $c = 0.84$ ,  $\text{CHCl}_3$ );  $^1\text{H NMR}$  (400 MHz,  $\text{DMSO-}d_6$ )  $\delta$  10.14 (s, 1H), 7.74 – 7.64 (m, 6H), 7.48 (d,  $J = 8.0$  Hz, 2H), 7.34 – 7.30 (m, 2H), 7.15 – 7.11 (m, 1H), 7.00 (d,  $J = 8.8$  Hz, 2H), 4.74 – 4.66 (m, 2H), 3.80 (s, 3H);  $^{13}\text{C NMR}$  (100 MHz,  $\text{DMSO-}d_6$ )  $\delta$  163.4, 162.2, 137.6, 136.7, 131.1, 130.1, 129.5 (q,  $J = 32$  Hz), 128.7, 127.9, 125.9 (q,  $J = 4$  Hz), 124.9, 123.9 (q,  $J = 271$  Hz), 121.1, 116.8, 114.4, 59.0, 55.7, 50.8. ;  $^{19}\text{F NMR}$  (376 Hz,  $\text{DMSO-}d_6$ )  $\delta$  -61.4; **HRMS**  $m/z$  calculated for :  $\text{C}_{24}\text{H}_{19}\text{F}_3\text{N}_2\text{O}_4\text{S}$   $[\text{M}+\text{Na}]^+$ : 511.0910, found: 511.0915; **HPLC** (Daicel Chirapak IA column, hexane/isopropanol = 55/45, flow 0.5 mL/min, detection at 214 nm) retention time = 23.94 min (major) and 33.06 min (minor).

**(R)-2-cyano-2-(4-cyanophenyl)-3-((4-methoxyphenyl)sulfonyl)-N-phenylpropanamide (3aa)**

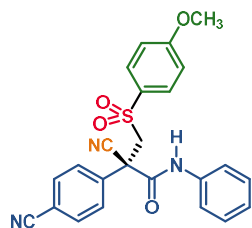

Prepared by the general procedure in a 0.2 mmol scale at the 20 °C for 72 h; Isolated as white solid using ethyl acetate/petroleum ether (1:3) as eluent (42 mg, 47% yield, >99% ee).  $[\alpha]_D^{15} = +41.6$  ( $c = 0.51$ ,  $\text{CHCl}_3$ );  $^1\text{H NMR}$  (400 MHz,  $\text{DMSO-}d_6$ )  $\delta$  10.14 (s, 1H), 7.84 (d,  $J = 8.4$  Hz, 2H), 7.65 (dd,  $J = 8.8, 1.2$  Hz, 4H), 7.47 (dd,  $J = 8.8, 1.2$  Hz, 2H), 7.34 – 7.30 (m, 2H), 7.15 – 7.11 (m, 1H), 7.04 (d,  $J = 9.2$  Hz, 2H), 4.69 (dd,  $J = 15.2, 17.2$  Hz, 2H), 3.83 (s, 3H);  $^{13}\text{C NMR}$  (100 MHz,  $\text{DMSO-}d_6$ )  $\delta$  163.4, 161.9, 137.6, 137.4, 132.8, 131.0, 130.1, 128.7, 127.9, 124.9, 121.0, 118.1, 116.6, 114.4, 112.0, 58.7, 55.8, 50.9; **HRMS**  $m/z$  calculated for :  $\text{C}_{24}\text{H}_{19}\text{N}_3\text{O}_4\text{S}$   $[\text{M}+\text{Na}]^+$ : 468.0988, found: 468.0990; **HPLC** (Daicel Chirapak IB column, hexane/isopropanol = 35/65, flow 0.7 mL/min, detection at 214 nm) retention time = 26.52 min (major) and 46.78 min (minor).

**(R)-2-cyano-N-(4-methoxyphenyl)-3-((4-methoxyphenyl)sulfonyl)-2-phenylpropanamide (3ab)**

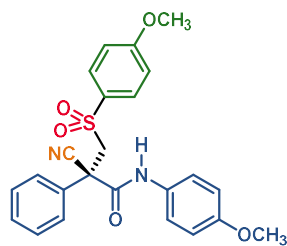

Prepared by the general procedure in a 0.2 mmol scale at the 20 °C for 72 h; Isolated as white solid using ethyl acetate/petroleum ether (1:3) as eluent (63 mg, 70% yield, >99% ee).  $[\alpha]_D^{19} = +67.6$  ( $c = 0.60$ ,  $\text{CHCl}_3$ );  **$^1\text{H NMR}$  (400 MHz,  $\text{DMSO-}d_6$ )**  $\delta$  9.88 (s, 1H), 7.75 (d,  $J = 9.2$  Hz, 2H), 7.50 (dd,  $J = 8.4$ , 2.0 Hz, 2H), 7.43-7.35 (m, 5H), 7.08 (d,  $J = 8.8$  Hz, 2H), 6.88 (d,  $J = 8.8$  Hz, 2H), 4.67 (d,  $J = 14.8$  Hz, 1H), 4.49 (d,  $J = 14.8$  Hz, 1H), 3.82 (s, 3H), 3.72 (s, 3H);  **$^{13}\text{C NMR}$  (100 MHz,  $\text{DMSO-}d_6$ )**  $\delta$  163.4, 162.5, 156.2, 133.4, 131.4, 130.7, 130.2, 129.12, 129.09, 126.3, 122.7, 117.3, 114.4, 113.7, 59.5, 55.8, 55.2, 50.7; **HRMS**  $m/z$  calculated for:  $\text{C}_{24}\text{H}_{22}\text{N}_2\text{O}_5\text{S}$   $[\text{M}+\text{Na}]^+$ : 473.1142, found: 473.1144; **HPLC** (Daicel Chirapak IA column, hexane/isopropanol = 35/65, flow 0.5 mL/min, detection at 214 nm) retention time = 28.81 min (major) and 36.40 min (minor).

**(R)-2-cyano-3-((4-methoxyphenyl)sulfonyl)-N-(4-phenoxyphenyl)-2-phenylpropanamide (3ac)**

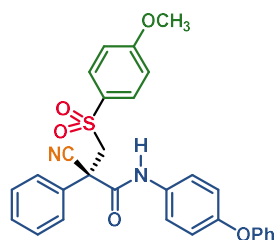

Prepared by the general procedure in a 0.2 mmol scale at the 20 °C for 72 h; Isolated as white solid using ethyl acetate/petroleum ether (1:3) as eluent (74 mg, 72% yield, >99% ee).  $[\alpha]_D^{19} = +51.5$  ( $c = 0.28$ ,  $\text{CHCl}_3$ );  **$^1\text{H NMR}$  (400 MHz,  $\text{DMSO-}d_6$ )**  $\delta$  10.03 (s, 1H), 7.77 (d,  $J = 8.8$  Hz, 2H), 7.53 – 7.48 (m, 4H), 7.44 – 7.34 (m, 5H), 7.14 – 7.07 (m, 3H), 6.99 – 6.96 (m, 4H), 4.70 (d,  $J = 14.8$  Hz, 1H), 4.51 (d,  $J = 14.8$  Hz, 1H), 3.82 (s, 3H);  **$^{13}\text{C NMR}$  (100 MHz,  $\text{DMSO-}d_6$ )**  $\delta$  163.5, 162.7, 157.0, 153.0, 133.4, 133.3, 131.4, 130.3, 130.0, 129.2, 126.3, 123.3, 122.7, 119.0, 118.2, 117.3, 114.5, 59.4, 55.8, 50.9; **HRMS**  $m/z$  calculated for:  $\text{C}_{29}\text{H}_{24}\text{N}_2\text{O}_5\text{S}$   $[\text{M}+\text{Na}]^+$ : 535.1298, found: 535.1299; **HPLC** (Daicel Chirapak IA column, hexane/isopropanol = 55/45, flow 0.5 mL/min, detection at 214 nm) retention time = 41.04 min (major) and 46.42 min (minor).

**(R)-2-cyano-3-((4-methoxyphenyl)sulfonyl)-2-phenyl-N-(3,4,5-trimethoxyphenyl)propanamide (3ad)**

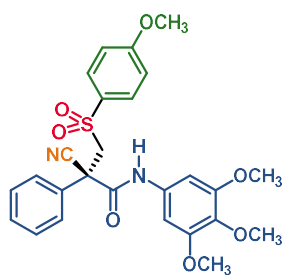

Prepared by the general procedure in a 0.2 mmol scale at the 20 °C for 72 h; Isolated as white solid using ethyl acetate/petroleum ether (1:3) as eluent (70 mg, 69% yield, 99% ee).  $[\alpha]_D^{19} = +29.0$  ( $c = 0.31$ ,  $\text{CHCl}_3$ );  **$^1\text{H NMR}$  (400 MHz,  $\text{DMSO-}d_6$ )**  $\delta$  9.85 (s, 1H), 7.74 (d,  $J = 9.2$  Hz, 2H), 7.51 – 7.48 (m, 2H), 7.43 – 7.36 (m, 3H), 7.06 (d,  $J = 8.8$  Hz, 2H), 6.94 (s, 2H), 4.69 (d,  $J = 14.8$  Hz, 1H), 4.52 (d,  $J = 14.8$  Hz, 1H), 3.80 (s, 3H), 3.72 (s, 6H), 3.61 (s, 3H);  **$^{13}\text{C NMR}$  (100 MHz,  $\text{DMSO-}d_6$ )**  $\delta$  163.4, 162.5, 152.5, 134.3, 134.0, 133.2, 131.3, 130.2, 129.2, 126.4, 117.2, 114.4, 98.1, 60.1, 59.3, 55.8, 55.7, 51.1; **HRMS**  $m/z$  calculated for  $\text{C}_{26}\text{H}_{26}\text{N}_2\text{O}_7\text{S}$   $[\text{M}+\text{Na}]^+$ : 533.1353, found: 533.1356; **HPLC** (Daicel Chirapak IA column, hexane/isopropanol = 35/65, flow 0.5 mL/min, detection at 214 nm) retention time = 20.90 min (minor) and 44.24 min (major).

**(R)-N-(4-(tert-butyl)phenyl)-2-cyano-3-((4-methoxyphenyl)sulfonyl)-2-phenylpropanamide (3ae)**

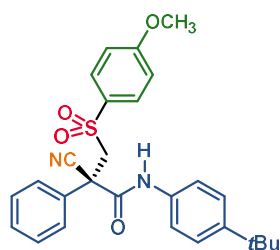

Prepared by the general procedure in a 0.2 mmol scale at the 20 °C for 72 h; Isolated as white solid using ethyl acetate/petroleum ether (1:3) as eluent (46 mg, 48% yield, >99% ee).  $[\alpha]_D^{16} = +48.7$  ( $c = 1.03$ ,  $\text{CHCl}_3$ );  **$^1\text{H NMR}$  (400 MHz,  $\text{DMSO-}d_6$ )**  $\delta$  9.93 (s, 1H), 7.76 (d,  $J = 8.8$  Hz, 2H), 7.52 – 7.49 (m, 2H), 7.43 – 7.37 (m, 5H), 7.32 (d,  $J = 8.8$  Hz, 2H), 7.07 (d,  $J = 8.8$  Hz, 2H), 4.69 (d,  $J = 15.2$  Hz, 1H), 4.50 (d,  $J = 15.2$  Hz, 1H), 3.81 (s, 3H), 1.24 (s, 9H);  **$^{13}\text{C NMR}$  (100 MHz,  $\text{DMSO-}d_6$ )**  $\delta$  163.5, 162.6, 147.1, 135.3, 133.4, 131.4, 130.3, 129.1, 126.4, 125.2, 120.6, 117.3, 114.5, 59.4, 55.8, 51.0, 34.1, 31.2; **HRMS**  $m/z$  calculated for :  $\text{C}_{27}\text{H}_{28}\text{N}_2\text{O}_4\text{S}$   $[\text{M}+\text{Na}]^+$ : 499.1662, found: 499.1662; **HPLC** (Daicel Chirapak IA column, hexane/isopropanol = 55/45, flow 0.5 mL/min, detection at 214 nm) retention time = 26.23 min (major) and 37.70 min (minor).

**(R)-2-cyano-3-((4-methoxyphenyl)sulfonyl)-2-phenyl-N-(o-tolyl)propanamid (3af)**

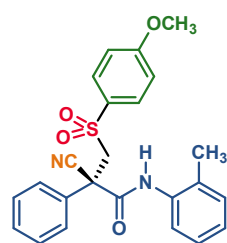

Prepared by the general procedure in a 0.2 mmol scale at the 20 °C for 72 h; Isolated as white solid using ethyl acetate/petroleum ether (1:3) as eluent (53 mg, 61% yield, 99% ee).  $[\alpha]_D^{15} = +18.5$  ( $c = 0.37$ ,  $\text{CHCl}_3$ );  **$^1\text{H NMR}$  (400 MHz,  $\text{DMSO-}d_6$ )**  $\delta$  9.71 (s, 1H), 7.76 (d,  $J = 8.8$  Hz, 2H), 7.55 – 7.53 (m, 2H), 7.45 – 7.38 (m, 3H), 7.21 – 7.13 (m, 3H), 7.10 (d,  $J = 9.2$  Hz, 2H), 7.07 – 7.05 (m, 1H), 4.64 (d,  $J = 15.2$  Hz, 1H), 4.49 (d,  $J = 15.2$  Hz, 1H), 3.84 (s, 3H), 1.95 (s, 3H);  **$^{13}\text{C NMR}$  (100 MHz,  $\text{DMSO-}d_6$ )**  $\delta$  163.44, 163.35, 135.1,

134.3, 133.4, 131.6, 130.4, 130.2, 129.11, 129.07, 126.82, 126.76, 126.3, 126.1, 117.4, 114.5, 59.3, 55.9, 50.3, 17.1; **HRMS**  $m/z$  calculated for :  $C_{24}H_{22}N_2O_4S$   $[M+Na]^+$ : 457.1192, found: 457.1190; **HPLC** (Daicel Chirapak IA column, hexane/isopropanol = 35/65, flow 0.5 mL/min, detection at 214 nm) retention time = 17.70 min (major) and 21.01 min (minor).

**(R)-2-cyano-N-(2,4-dimethylphenyl)-3-((4-methoxyphenyl)sulfonyl)-2-phenylpropanamide (3ag)**

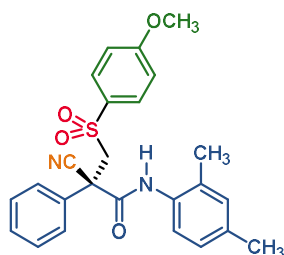

Prepared by the general procedure in a 0.2 mmol scale at the 20 °C for 72 h; Isolate as white solid using ethyl acetate/petroleum ether (1:3) as eluent (65 mg, 72% yield, >99% ee).  $[\alpha]_D^{19} = +58.0$  ( $c = 0.60$ ,  $CHCl_3$ );  **$^1H$  NMR (400 MHz, DMSO- $d_6$ )**  $\delta$  9.63 (s, 1H), 7.75 (d,  $J = 8.8$  Hz, 2H), 7.53 (dd,  $J = 8.4, 2.0$  Hz, 2H), 7.44 – 7.39 (m, 3H), 7.09 (d,  $J = 8.8$  Hz, 2H), 6.99 – 6.96 (m, 2H), 6.92 (d,  $J = 7.6$  Hz, 1H), 4.62 (d,  $J = 15.2$  Hz, 1H), 4.47 (d,  $J = 15.2$  Hz, 1H), 3.84 (s, 3H), 2.24 (s, 3H), 1.90 (s, 3H);  **$^{13}C$  NMR (100 MHz, DMSO- $d_6$ )**  $\delta$  163.41, 163.35, 136.0, 134.0, 133.4, 132.5, 131.6, 130.9, 130.2, 129.04, 129.01, 126.6, 126.5, 126.3, 117.4, 114.4, 59.3, 55.8, 50.2, 20.5, 17.0; **HRMS**  $m/z$  calculated for :  $C_{25}H_{24}N_2O_4S$   $[M+Na]^+$ : 471.1349, found: 471.1349; **HPLC** (Daicel Chirapak IA column, hexane/isopropanol = 55/45, flow 0.5 mL/min, detection at 214 nm) retention time = 24.89 min (major) and 45.82 min (minor).

**(R)-2-cyano-3-((4-methoxyphenyl)sulfonyl)-N-(naphthalen-2-yl)-2-phenylpropanamide (3ah)**

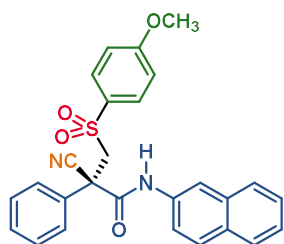

Prepared by the general procedure in a 0.2 mmol scale at the 20 °C for 72 h; Isolated as white solid using ethyl acetate/petroleum ether (1:3) as eluent (52 mg, 55% yield, >99% ee).  $[\alpha]_D^{10} = +68.3$  ( $c = 1.0$ ,  $CHCl_3$ );  **$^1H$  NMR (400 MHz, DMSO- $d_6$ )**  $\delta$  10.20 (s, 1H), 8.08 (d,  $J = 2.0$  Hz, 1H), 7.87 – 7.83 (m, 3H), 7.77 (d,  $J = 9.2$  Hz, 2H), 7.58 – 7.54 (m, 3H), 7.51 – 7.39 (m, 5H), 7.07 (d,  $J = 8.8$  Hz, 2H), 4.76 (d,  $J = 15.2$  Hz, 1H), 4.57 (d,  $J = 15.2$  Hz, 1H), 3.76 (s, 3H);  **$^{13}C$  NMR (100 MHz, DMSO- $d_6$ )**  $\delta$  163.5, 163.0, 135.4, 133.3, 133.0, 131.3, 130.4, 130.3, 129.2, 128.2, 127.49, 127.46, 126.6, 126.4, 125.3, 121.0, 117.8, 117.2, 114.5, 59.3, 55.7, 51.1; **HRMS**  $m/z$  calculated for :  $C_{27}H_{22}N_2O_4S$   $[M+Na]^+$ : 493.1192, found: 493.1195; **HPLC** (Daicel Chirapak IA column, hexane/isopropanol = 35/65, flow 0.5 mL/min, detection at 214 nm) retention time = 27.59 min (major) and 32.24 min (minor).

**(R)-2-cyano-N-(4-fluorophenyl)-3-((4-methoxyphenyl)sulfonyl)-2-phenylpropanamide (3ai)**

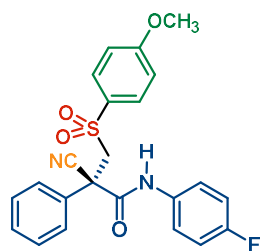

Prepared by the general procedure in a 0.2 mmol scale at the 20 °C for 72 h; Isolated as white solid using ethyl acetate/petroleum ether (1:3) as eluent (53 mg, 60% yield, >99% ee).  $[\alpha]_D^{20} = +43.0$  (c = 0.30, CHCl<sub>3</sub>); **<sup>1</sup>H NMR (400 MHz, DMSO-*d*<sub>6</sub>)** δ 10.07 (s, 1H), 7.76 (d, *J* = 8.8 Hz, 2H), 7.52 – 7.47 (m, 4H), 7.44 – 7.37 (m, 3H), 7.18 – 7.14 (m, 2H), 7.08 (d, *J* = 8.8 Hz, 2H), 4.68 (d, *J* = 14.8 Hz, 1H), 4.52 (d, *J* = 14.8 Hz, 1H), 3.82 (s, 3H); **<sup>13</sup>C NMR (100 MHz, DMSO-*d*<sub>6</sub>)** δ 163.5, 162.8, 158.9 (d, *J* = 240 Hz), 134.1 (d, *J* = 3 Hz), 133.2, 131.3, 130.2, 129.2, 126.3, 123.0 (d, *J* = 8 Hz), 117.2, 115.3 (d, *J* = 23 Hz), 114.5, 59.4, 55.8, 50.8; **<sup>19</sup>F NMR (376 Hz, DMSO-*d*<sub>6</sub>)** δ -117.6; **HRMS *m/z*** calculated for : C<sub>23</sub>H<sub>19</sub>FN<sub>2</sub>O<sub>4</sub>S [M+Na]<sup>+</sup>: 461.0942, found: 461.0938; **HPLC** (Daicel Chirapak IC column, hexane/isopropanol = 35/65, flow 0.5 mL/min, detection at 214 nm) retention time = 29.12 min (minor) and 32.23 min (major).

**(R)-N-(4-chlorophenyl)-2-cyano-3-((4-methoxyphenyl)sulfonyl)-2-phenylpropanamide (3aj)**

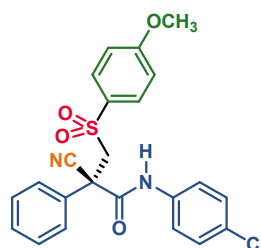

Prepared by the general procedure in a 0.2 mmol scale at the 20 °C for 72 h; Isolated as white solid using ethyl acetate/petroleum ether (1:3) as eluent (65 mg, 71% yield, >99% ee).  $[\alpha]_D^{15} = +72.0$  (c = 0.45, CHCl<sub>3</sub>); **<sup>1</sup>H NMR (400 MHz, DMSO-*d*<sub>6</sub>)** δ 10.13 (s, 1H), 7.76 (d, *J* = 8.8 Hz, 2H), 7.53 – 7.50 (m, 4H), 7.44 – 7.36 (m, 5H), 7.07 (d, *J* = 8.8 Hz, 2H), 4.70 (d, *J* = 15.2 Hz, 1H), 4.54 (d, *J* = 15.2 Hz, 1H), 3.81 (s, 3H); **<sup>13</sup>C NMR (100 MHz, DMSO-*d*<sub>6</sub>)** δ 163.4, 162.9, 136.7, 133.1, 131.3, 130.2, 129.22, 129.20, 128.5, 128.4, 126.3, 122.5, 117.1, 114.5, 59.3, 55.8, 51.0; **HRMS *m/z*** calculated for : C<sub>23</sub>H<sub>19</sub>ClN<sub>2</sub>O<sub>4</sub>S [M+Na]<sup>+</sup>: 477.0646, found: 477.0648; **HPLC** (Daicel Chirapak IC column, hexane/isopropanol = 60/40, flow 0.5 mL/min, detection at 214 nm) retention time = 58.48 min (minor) and 62.34 min (major).

**(R)-N-(4-bromophenyl)-2-cyano-3-((4-methoxyphenyl)sulfonyl)-2-phenylpropanamide (3ak)**



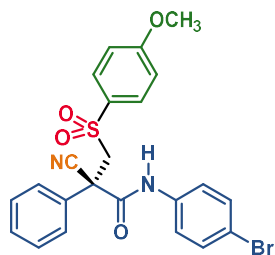

Prepared by the general procedure in a 0.2 mmol scale at the 20 °C for 72 h; Isolated as white solid using ethyl acetate/petroleum ether (1:3) as eluent (59 mg, 59% yield, >99% ee).  $[\alpha]_D^{19} = +48.7$  ( $c = 0.32$ ,  $\text{CHCl}_3$ );  **$^1\text{H NMR}$  (400 MHz,  $\text{DMSO-}d_6$ )**  $\delta$  10.11 (s, 1H), 7.75 (d,  $J = 8.8$  Hz, 2H), 7.52 – 7.38 (m, 9H), 7.07 (d,  $J = 8.8$  Hz, 2H), 4.69 (d,  $J = 15.2$  Hz, 1H), 4.53 (d,  $J = 15.2$  Hz, 1H), 3.81 (s, 3H);  **$^{13}\text{C NMR}$  (100 MHz,  $\text{DMSO-}d_6$ )**  $\delta$  163.5, 162.9, 137.1, 133.1, 131.5, 131.3, 130.2, 129.24, 129.22, 126.3, 122.9, 117.1, 116.6, 114.5, 59.2, 55.8, 51.0; **HRMS**  $m/z$  calculated for :  $\text{C}_{23}\text{H}_{19}\text{BrN}_2\text{O}_4\text{S}$   $[\text{M}+\text{Na}]^+$ : 521.0141, found: 521.0145; **HPLC** (Daicel Chirapak IA column, hexane/isopropanol = 55/45, flow 0.5 mL/min, detection at 214 nm) retention time = 33.89 min (major) and 37.80 min (minor).

**(R)-2-cyano-N-(4-iodophenyl)-3-((4-methoxyphenyl)sulfonyl)-2-phenylpropanamide (3al)**

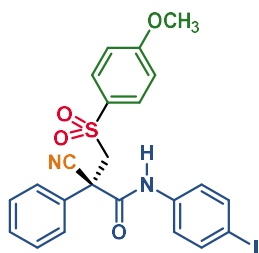

Prepared by the general procedure in a 0.2 mmol scale at the 20 °C for 72 h; Isolated as white solid using ethyl acetate/petroleum ether (1:3) as eluent (65 mg, 60% yield, >99% ee).  $[\alpha]_D^{16} = +59.3$  ( $c = 0.48$ ,  $\text{CHCl}_3$ );  **$^1\text{H NMR}$  (400 MHz,  $\text{DMSO-}d_6$ )**  $\delta$  10.07 (s, 1H), 7.75 (d,  $J = 8.8$  Hz, 2H), 7.66 (d,  $J = 8.8$  Hz, 2H), 7.51 – 7.48 (m, 2H), 7.43 – 7.36 (m, 3H), 7.32 (d,  $J = 8.8$  Hz, 2H), 7.07 (d,  $J = 8.8$  Hz, 2H), 4.69 (d,  $J = 15.2$  Hz, 1H), 4.53 (d,  $J = 15.2$  Hz, 1H), 3.81 (s, 3H);  **$^{13}\text{C NMR}$  (100 MHz,  $\text{DMSO-}d_6$ )**  $\delta$  163.4, 162.9, 137.6, 137.3, 133.1, 131.2, 130.2, 129.2, 126.3, 123.0, 117.1, 114.5, 88.8, 59.2, 55.8, 51.1; **HRMS**  $m/z$  calculated for :  $\text{C}_{23}\text{H}_{19}\text{IN}_2\text{O}_4\text{S}$   $[\text{M}+\text{Na}]^+$ : 569.0002, found: 569.0004; **HPLC** (Daicel Chirapak IA column, hexane/isopropanol = 35/65, flow 0.5 mL/min, detection at 214 nm) retention time = 28.76 min (major) and 31.78 min (minor).

**(R)-2-cyano-N-(3-fluoro-4-morpholinophenyl)-3-((4-methoxyphenyl)sulfonyl)-2-phenylpropanamide (3am)**

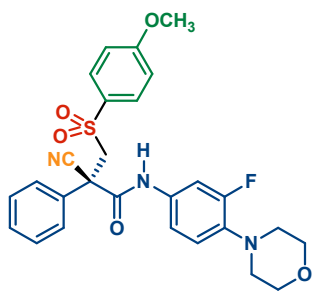

Prepared by the general procedure in a 0.2 mmol scale at the 20 °C for 72 h; Isolated as white solid using ethyl acetate/petroleum ether (1:3) as eluent (48 mg, 46% yield, 99% ee).  $[\alpha]_D^{18} = +59.2$  ( $c = 0.50$ ,  $\text{CHCl}_3$ );  **$^1\text{H NMR}$  (400 MHz,  $\text{DMSO-}d_6$ )**  $\delta$  10.02 (s, 1H), 7.75 (d,  $J = 8.8$  Hz, 2H), 7.49 (dd,  $J = 8.4, 2.0$  Hz, 2H), 7.43 – 7.34 (m, 4H), 7.20 (dd,  $J = 8.8, 2.0$  Hz, 1H), 7.07 (d,  $J = 8.8$  Hz, 2H), 7.00 – 6.95 (m, 1H), 4.67 (d,  $J = 15.2$  Hz, 1H), 4.51 (d,  $J = 15.2$  Hz, 1H), 3.81 (s, 3H), 3.45 (t,  $J = 4.8$  Hz, 2H), 3.35 (t,  $J = 4.8$  Hz, 2H), 2.75 (s, 2H);  **$^{13}\text{C NMR}$  (100 MHz,  $\text{DMSO-}d_6$ )**  $\delta$  163.4, 162.9, 137.6, 137.3, 133.1, 131.2, 130.2, 129.2, 126.3, 123.0, 117.1, 114.5, 88.8, 59.2, 55.8, 51.1, 49.5, 48.5, 47.5, 46.5, 45.5, 44.5, 43.5, 42.5, 41.5, 40.5, 39.5, 38.5, 37.5, 36.5, 35.5, 34.5, 33.5, 32.5, 31.5, 30.5, 29.5, 28.5, 27.5, 26.5, 25.5, 24.5, 23.5, 22.5, 21.5, 20.5, 19.5, 18.5, 17.5, 16.5, 15.5, 14.5, 13.5, 12.5, 11.5, 10.5, 9.5, 8.5, 7.5, 6.5, 5.5, 4.5, 3.5, 2.5, 1.5, 0.5; **HRMS**  $m/z$  calculated for :  $\text{C}_{23}\text{H}_{24}\text{FN}_3\text{O}_4\text{S}$   $[\text{M}+\text{Na}]^+$ : 517.1552, found: 517.1552; **HPLC** (Daicel Chirapak IA column, hexane/isopropanol = 35/65, flow 0.5 mL/min, detection at 214 nm) retention time = 28.76 min (major) and 31.78 min (minor).

= 15.2 Hz, 1H), 3.81 (s, 3H), 3.72 (t,  $J = 4.4$  Hz, 4H), 2.94 (t,  $J = 4.4$  Hz, 4H);  $^{13}\text{C}$  NMR (100 MHz, DMSO- $d_6$ )  $\delta$  163.5, 162.6, 154.1 (d,  $J = 242$  Hz), 136.4 (d,  $J = 8$  Hz), 133.3, 132.6 (d,  $J = 11$  Hz), 131.3, 130.3, 129.2, 126.3, 118.8 (d,  $J = 4$  Hz), 117.2, 117.0 (d,  $J = 3$  Hz), 114.5, 109.08 (d,  $J = 25$  Hz), 66.2, 59.3, 55.8, 50.9, 50.6 (d,  $J = 3$  Hz);  $^{19}\text{F}$  NMR (376 Hz, DMSO- $d_6$ )  $\delta$  -121.7; HRMS  $m/z$  calculated for :  $\text{C}_{27}\text{H}_{26}\text{FN}_3\text{O}_5\text{S}$   $[\text{M}+\text{Na}]^+$ : 546.1469, found: 546.1473; HPLC (Daicel Chirapak IA column, hexane/isopropanol = 35/65, flow 0.5 mL/min, detection at 214 nm) retention time = 32.36 min (major) and 45.96 min (minor).

**(R)-2-cyano-3-((4-methoxyphenyl)sulfonyl)-2-phenyl-N-(4-(trifluoromethyl)phenyl)propanamide (3an)**

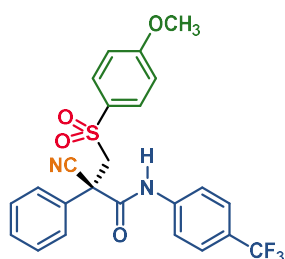

Prepared by the general procedure in a 0.2 mmol scale at the 20 °C for 72 h; Isolated as white solid using ethyl acetate/petroleum ether (1:3) as eluent (43 mg, 44% yield, 99% ee).  $[\alpha]_D^{18} = +25.7$  ( $c = 0.32$ ,  $\text{CHCl}_3$ );  $^1\text{H}$  NMR (400 MHz, DMSO- $d_6$ )  $\delta$  10.31 (s, 1H), 7.77 – 7.68 (m, 6H), 7.52 (dd,  $J = 8.4, 2.0$  Hz, 2H), 7.45 – 7.38 (m, 3H), 7.07 (d,  $J = 8.8$  Hz, 2H), 4.74 (d,  $J = 15.2$  Hz, 1H), 4.59 (d,  $J = 15.2$  Hz, 1H), 3.79 (s, 3H);  $^{13}\text{C}$  NMR (100 MHz, DMSO- $d_6$ )  $\delta$  163.5, 163.3, 141.4, 133.0, 131.2, 130.3, 129.33, 129.28, 126.4, 125.9 (q,  $J = 3$  Hz), 124.6 (q,  $J = 32$  Hz), 124.2 (q,  $J = 270$  Hz), 120.8, 117.0, 114.5, 59.1, 55.8, 51.2;  $^{19}\text{F}$  NMR (376 Hz, DMSO- $d_6$ )  $\delta$  -60.6; HRMS  $m/z$  calculated for :  $\text{C}_{24}\text{H}_{19}\text{F}_3\text{N}_2\text{O}_4\text{S}$   $[\text{M}+\text{Na}]^+$ : 511.0910, found: 511.0912; HPLC (Daicel Chirapak IA column, hexane/isopropanol = 55/45, flow 0.5 mL/min, detection at 214 nm) retention time = 25.89 min (major) and 29.76 min (minor).

**(R)-N-benzyl-2-cyano-3-((4-methoxyphenyl)sulfonyl)-2-phenylpropanamide (3ao)**

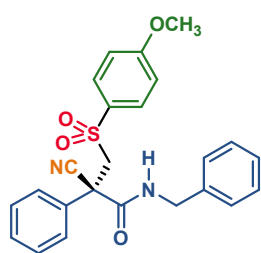

Prepared by the general procedure in a 0.2 mmol scale at the 20 °C for 72 h; Isolated as white solid using ethyl acetate/petroleum ether (1:3) as eluent (52 mg, 60% yield, >99% ee).  $[\alpha]_D^{16} = +17.7$  ( $c = 0.30$ ,  $\text{CHCl}_3$ );  $^1\text{H}$  NMR (400 MHz, DMSO- $d_6$ )  $\delta$  8.83 (t,  $J = 6.0$  Hz, 1H), 7.71 (d,  $J = 8.8$  Hz, 2H), 7.44 – 7.42 (m, 2H), 7.36 – 7.35 (m, 3H), 7.25 – 7.17 (m, 3H), 7.10 – 7.06 (m, 4H), 4.52 (d,  $J = 14.8$  Hz, 1H), 4.38 (d,  $J = 14.8$  Hz, 1H), 4.30 (dd,  $J = 15.2, 6.0$  Hz, 1H), 4.18 (dd,  $J = 15.2, 5.6$  Hz, 1H), 3.84 (s, 3H);  $^{13}\text{C}$  NMR (100 MHz, DMSO- $d_6$ )  $\delta$  164.3, 163.4, 138.5, 133.3, 130.1, 128.9, 128.14, 128.11, 126.9, 126.8, 126.2, 117.5, 114.4, 59.4, 55.8, 49.8, 43.3; HRMS  $m/z$  calculated for :  $\text{C}_{24}\text{H}_{22}\text{N}_2\text{O}_4\text{S}$   $[\text{M}+\text{Na}]^+$ : 457.1192, found: 457.1192; HPLC (Daicel Chirapak IA column, hexane/isopropanol = 35/65, flow 0.5 mL/min, detection at 214 nm) retention time = 17.09

min (major) and 22.69 min (minor).

**(R)-2-cyano-3-((4-methoxyphenyl)sulfonyl)-2-phenyl-N-(prop-2-yn-1-yl)propanamide (3ap)**

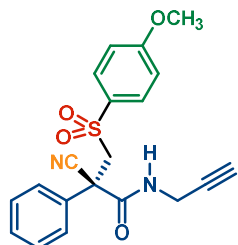

Prepared by the general procedure in a 0.2 mmol scale at the 20 °C for 72 h; Isolated as white solid using ethyl acetate/petroleum ether (1:2) as eluent (41 mg, 53% yield, >99% ee).  $[\alpha]_D^{16} = +16.1$  (c = 0.27, CHCl<sub>3</sub>); **<sup>1</sup>H NMR (400 MHz, DMSO-*d*<sub>6</sub>)** δ 8.76 (t, *J* = 5.2 Hz, 1H), 7.70 (d, *J* = 8.8 Hz, 2H), 7.42 – 7.35 (m, 5H), 7.07 (d, *J* = 8.8 Hz, 2H), 4.46 (d, *J* = 14.8 Hz, 1H), 4.37 (d, *J* = 14.8 Hz, 1H), 3.85 – 3.73 (m, 5H), 3.09 (t, *J* = 2.4 Hz, 1H); **<sup>13</sup>C NMR (100 MHz, DMSO-*d*<sub>6</sub>)** δ 164.0, 163.4, 133.1, 131.4, 130.1, 128.9, 126.2, 117.2, 114.4, 79.9, 73.4, 59.4, 55.8, 49.7 29.5; **HRMS** *m/z* calculated for C<sub>20</sub>H<sub>18</sub>N<sub>2</sub>O<sub>4</sub>S [M+Na]<sup>+</sup>: 405.0879, found: 405.0880; **HPLC** (Daicel Chirapak IA column, hexane/isopropanol = 45/55, flow 0.5 mL/min, detection at 214 nm) retention time = 16.22 min (major) and 19.19 min(minor).

**(R)-2-cyano-3-((4-methoxyphenyl)sulfonyl)-2-phenyl-N-propylpropanamide (3aq)**

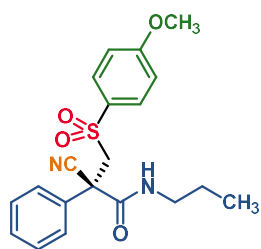

Prepared by the general procedure in a 0.2 mmol scale at the 20 °C for 72 h; Isolated as white solid using ethyl acetate/petroleum ether (1:3) as eluent (34 mg, 44% yield, 98% ee).  $[\alpha]_D^{18} = +39.4$  (c = 0.33, CHCl<sub>3</sub>); **<sup>1</sup>H NMR (400 MHz, DMSO-*d*<sub>6</sub>)** δ 8.22 (t, *J* = 5.6 Hz, 1H), 7.71 (d, *J* = 8.8 Hz, 2H), 7.43 – 7.33 (m, 5H), 7.08 (d, *J* = 8.8 Hz, 2H), 4.47 (d, *J* = 14.8 Hz, 1H), 4.32 (d, *J* = 14.8 Hz, 1H), 3.84 (s, 3H), 3.04 – 2.90 (m, *J* = 6.4 Hz 2H), 1.39 – 1.30 (m, *J* = 7.2 Hz, 2H), 0.70 (t, *J* = 7.2 Hz, 3H); **<sup>13</sup>C NMR (100 MHz, DMSO-*d*<sub>6</sub>)** δ 164.0, 163.3, 133.6, 131.5, 130.2, 128.9, 128.8, 126.1, 117.6, 114.4, 59.6, 55.8, 49.7, 41.7, 21.7, 11.0; **HRMS** *m/z* calculated for : C<sub>20</sub>H<sub>22</sub>N<sub>2</sub>O<sub>4</sub>S [M+Na]<sup>+</sup>: 409.1192, found: 409.1193; **HPLC** (Daicel Chirapak IA column, hexane/isopropanol = 55/45, flow 0.5 mL/min, detection at 214 nm) retention time = 17.04 min (major) and 22.47 min (minor).

**(R)-2-cyano-3-((4-methoxyphenyl)sulfonyl)-2-phenylpropanamide (3ar)**

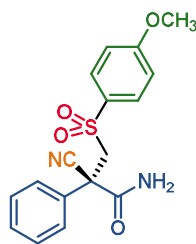

Prepared by the general procedure in a 0.2 mmol scale at the 20 °C for 72 h; Isolated as white solid using ethyl acetate/petroleum ether (1:3) as eluent (30 mg, 44% yield, 97% ee).  $[\alpha]_D^{18} = +4.9$  (c = 0.43, CHCl<sub>3</sub>); **<sup>1</sup>H NMR (400 MHz, DMSO-*d*<sub>6</sub>)** δ 7.74 – 7.68 (m, 4H), 7.44 – 7.41 (m, 2H), 7.37 – 7.33 (m, 3H), 7.06 (d, *J* = 8.8 Hz, 2H), 4.45 (d, *J* = 14.8 Hz, 1H),

4.33 (d,  $J = 14.8$  Hz, 1H), 3.84 (s, 3H);  $^{13}\text{C}$  NMR (100 MHz, DMSO- $d_6$ )  $\delta$  165.7, 163.3, 133.4, 131.6, 130.1, 128.9, 128.8, 126.2, 117.6, 114.4, 59.4, 55.8, 49.8; HRMS  $m/z$  calculated for:  $\text{C}_{17}\text{H}_{16}\text{N}_2\text{O}_4\text{S}$   $[\text{M}+\text{Na}]^+$ : 367.0723, found: 367.0719; HPLC (Daicel Chirapak IA column, hexane/isopropanol = 35/65, flow 0.5 mL/min, detection at 214 nm) retention time = 15.94 min (major) and 18.17 min (minor).

**(S)-3-((4-methoxyphenyl)sulfonyl)-2-phenyl-2-(pyridin-2-yl)propanenitrile (3as)**

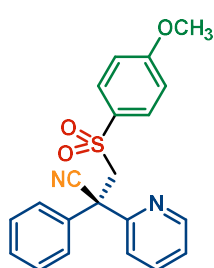

Prepared by the general procedure in a 0.2 mmol scale at the 20 °C for 72 h; Isolated as white solid using ethyl acetate/petroleum ether (1:3) as eluent (44 mg, 58% yield, 92% ee).  $[\alpha]_{\text{D}}^{18} = +53.2$  ( $c = 0.36$ ,  $\text{CHCl}_3$ ). According to the X-ray analysis, the “absolute stereochemistry” of the product is the S configuration.  $^1\text{H}$  NMR (400 MHz, DMSO- $d_6$ )  $\delta$  8.47 (d,  $J = 4.4$  Hz, 1H), 7.80 (td,  $J = 7.6, 1.6$  Hz, 1H), 7.58 (d,  $J = 9.2$  Hz, 2H), 7.48 (d,  $J = 8.0$  Hz, 1H), 7.40 – 7.37 (m, 2H), 7.34 – 7.25 (m, 4H), 6.98 (d,  $J = 8.8$  Hz, 2H), 4.87 (d,  $J = 15.2$  Hz, 1H), 4.70 (d,  $J = 15.2$  Hz, 1H), 3.83 (s, 3H);  $^{13}\text{C}$  NMR (100 MHz, DMSO- $d_6$ )  $\delta$  163.2, 155.8, 149.0, 138.0, 136.9, 131.4, 130.0, 128.9, 128.4, 126.5, 123.5, 121.7, 119.4, 114.3, 60.3, 55.8, 49.9; HRMS  $m/z$  calculated for:  $\text{C}_{21}\text{H}_{18}\text{N}_2\text{O}_3\text{S}$   $[\text{M}+\text{Na}]^+$ : 401.0930, found: 401.0934; HPLC (Daicel Chirapak OD-H column, hexane/isopropanol = 55/45, flow 0.5 mL/min, detection at 214 nm) retention time = 22.84 min (major) and 25.94 min (minor).

**Methyl (S)-2-((R)-2-cyano-3-((4-methoxyphenyl)sulfonyl)-2-phenylpropanamido)-3,3-dimethylbutanoate (5a)**

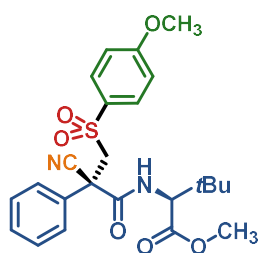

Prepared by the general procedure in a 0.2 mmol scale at the 20 °C for 72 h; Isolated as white solid using ethyl acetate/petroleum ether (1:3) as eluent (20 mg, 21% yield, >99% de).  $[\alpha]_{\text{D}}^{16} = +8.7$  ( $c = 0.30$ ,  $\text{CHCl}_3$ );  $^1\text{H}$  NMR (400 MHz, DMSO- $d_6$ )  $\delta$  7.93 (d,  $J = 8.8$  Hz, 1H), 7.71 (d,  $J = 8.8$  Hz, 2H), 7.45 – 7.43 (m, 2H), 7.37 – 7.35 (m, 3H), 7.08 (d,  $J = 8.8$  Hz, 2H), 4.65 (d,  $J = 14.8$  Hz, 1H), 4.48 (d,  $J = 14.8$  Hz, 1H), 4.21 (d,  $J = 8.8$  Hz, 1H), 3.84 (s, 3H), 3.58 (s, 3H), 0.84 (s, 9H);  $^{13}\text{C}$  NMR (100 MHz, DMSO- $d_6$ )  $\delta$  170.2, 164.6, 163.5, 132.9, 131.6, 130.3, 129.0, 128.9, 126.6, 117.4, 114.4, 61.2, 58.7, 55.9, 51.7, 50.7, 34.5, 26.4; HRMS  $m/z$  calculated for:  $\text{C}_{24}\text{H}_{28}\text{N}_2\text{O}_6\text{S}$   $[\text{M}+\text{Na}]^+$ : 495.1560, found: 495.1561; HPLC (Daicel Chirapak IA column, hexane/isopropanol = 85/15, flow 0.5 mL/min, detection at 214 nm) retention time = 55.26 min (major) and 108.27 min (minor). Our reactions can also be applied to chiral substrates, but may be affected by the chirality of

the substrate, and the product of the reaction is not racemic.

**Methyl ((R)-2-cyano-3-((4-methoxyphenyl)sulfonyl)-2-phenylpropanoyl)-L-methioninate (5b)**

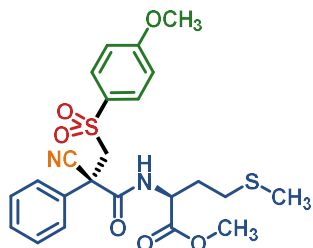

Prepared by the general procedure in a 0.2 mmol scale at the 20 °C for 72 h; Isolated as white solid using ethyl acetate/petroleum ether (1:1) as eluent (31 mg, 32% yield, >99% *de*).  $[\alpha]_D^{10} = +30.6$  ( $c = 0.61$ ,  $\text{CHCl}_3$ );  **$^1\text{H NMR}$  (400 MHz,  $\text{DMSO-}d_6$ )**  $\delta$  8.72 (d,  $J = 7.6$  Hz, 1H), 7.70 (d,  $J = 8.4$  Hz, 2H), 7.44 – 7.35 (m, 5H), 7.08 (d,  $J = 8.8$  Hz, 2H), 4.45 – 4.31 (m, 3H), 3.84 (s, 3H), 3.52 (s, 3H), 2.48 – 2.34 (m, 2H), 2.01 – 1.96 (m, 5H);  **$^{13}\text{C NMR}$  (100 MHz,  $\text{DMSO-}d_6$ )**  $\delta$  171.2, 164.5, 163.4, 132.9, 131.7, 130.1, 129.0, 128.8, 126.6, 117.3, 114.4, 59.9, 55.9, 52.1, 52.0, 49.6, 29.6, 14.6; **HRMS**  $m/z$  calculated for  $\text{C}_{23}\text{H}_{26}\text{N}_2\text{O}_6\text{S}_2$   $[\text{M}+\text{Na}]^+$ : 513.1124, found: 513.1126; **HPLC** (Daicel Chirapak IA column, hexane/isopropanol = 45/55, flow 0.5 mL/min, detection at 214 nm) retention time = 20.82 min (major) and 24.10 min (minor).

**Methyl (R)-(2-cyano-3-((4-methoxyphenyl)sulfonyl)-2-phenylpropanoyl)glycinate (5c)**

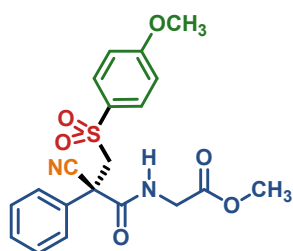

Prepared by the general procedure in a 0.2 mmol scale at the 20 °C for 72 h; Isolated as white solid using ethyl acetate/petroleum ether (1:1) as eluent (41 mg, 49% yield, >99% *ee*).  $[\alpha]_D^{10} = +45.6$  ( $c = 0.48$ ,  $\text{CHCl}_3$ );  **$^1\text{H NMR}$  (400 MHz,  $\text{DMSO-}d_6$ )**  $\delta$  8.72 (t,  $J = 6.0$  Hz, 1H), 7.69 (d,  $J = 9.2$  Hz, 2H), 7.46 – 7.44 (m, 2H), 7.38 – 7.35 (m, 3H), 7.07 (d,  $J = 8.8$  Hz, 2H), 4.42 – 4.34 (m, 2H), 3.85 (s, 3H), 3.78 (t,  $J = 5.2$  Hz, 2H), 3.55 (s, 3H);  **$^{13}\text{C NMR}$  (100 MHz,  $\text{DMSO-}d_6$ )**  $\delta$  169.2, 164.7, 163.4, 133.0, 131.4, 130.2, 129.0, 128.9, 126.5, 117.3, 114.4, 59.6, 55.8, 51.7, 49.5, 41.8; **HRMS**  $m/z$  calculated for  $\text{C}_{20}\text{H}_{20}\text{N}_2\text{O}_6\text{S}$   $[\text{M}+\text{Na}]^+$ : 439.0934, found: 439.0934; **HPLC** (Daicel Chirapak IA column, hexane/isopropanol = 45/55, flow 0.5 mL/min, detection at 214 nm) retention time = 19.15 min (major) and 22.64 min (minor).

**Methyl (R)-(R)-(2-cyano-3-((4-methoxyphenyl)sulfonyl)-2-phenylpropanoyl)glycylglycinate (5d)**

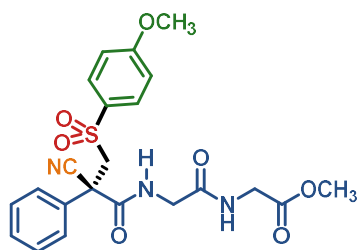

Prepared by the general procedure in a 0.2 mmol scale at the 20 °C for 72 h; Isolated as white solid using ethyl acetate/petroleum ether (2:1) as eluent (29 mg, 31% yield, >99% ee).  $[\alpha]_D^{10} = +54.0$  (c = 0.39, CHCl<sub>3</sub>); **<sup>1</sup>H NMR (400 MHz, DMSO-*d*<sub>6</sub>)** δ 8.53 (t, *J* = 5.6 Hz, 1H), 8.23 (t, *J* = 6.0 Hz, 1H), 7.69 (d, *J* = 8.8 Hz, 2H), 7.49 – 7.47 (m, 2H), 7.35 – 7.34 (m, 3H), 7.07 (d, *J* = 8.8 Hz, 2H), 4.48 – 4.40 (m, 2H), 3.87 – 3.85 (m, 5H), 3.70 (t, *J* = 5.6 Hz, 2H), 3.62 (s, 3H); **<sup>13</sup>C NMR (100 MHz, DMSO-*d*<sub>6</sub>)** δ 170.1, 168.3, 164.4, 163.4, 133.1, 131.2, 130.2, 128.93, 128.88, 126.5, 117.4, 114.4, 59.4, 55.8, 51.8, 49.8, 42.9, 40.5; **HRMS** *m/z* calculated for C<sub>22</sub>H<sub>23</sub>N<sub>3</sub>O<sub>7</sub>S [M+Na]<sup>+</sup>: 496.1149, found: 496.1150; **HPLC** (Daicel Chirapak ADH column, hexane/isopropanol = 45/55, flow 0.5 mL/min, detection at 214 nm) retention time = 24.32 min (major) and 37.48 min (minor).

### Methyl ((*R*)-2-cyano-3-((4-methoxyphenyl)sulfonyl)-2-phenylpropanoyl)-*L*-alanyl-*L*-alaninate (**5e**)

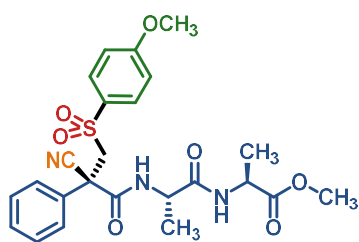

Prepared by the general procedure in a 0.2 mmol scale at the 20 °C for 72 h; Isolated as white solid using ethyl acetate/petroleum ether (2:1) as eluent (40 mg, 40% yield, >99% ee).  $[\alpha]_D^{10} = +11.6$  (c = 0.32, CHCl<sub>3</sub>); **<sup>1</sup>H NMR (400 MHz, DMSO-*d*<sub>6</sub>)** δ 8.18 (dd, *J* = 6.8, 3.2 Hz, 2H), 7.70 (d, *J* = 9.2 Hz, 2H), 7.45 – 7.42 (m, 2H), 7.36 – 7.34 (m, 3H), 7.08 (d, *J* = 8.8 Hz, 2H), 4.49 – 4.40 (m, 2H), 4.27 – 4.19 (m, 2H), 3.85 (s, 3H), 3.60 (s, 3H), 1.24 (dd, *J* = 7.2, 5.2 Hz, 6H); **<sup>13</sup>C NMR (100 MHz, DMSO-*d*<sub>6</sub>)** δ 172.8, 171.1, 163.6, 163.4, 133.0, 131.3, 130.2, 128.9, 126.5, 117.5, 114.4, 59.3, 55.9, 51.9, 50.0, 49.3, 47.6, 17.5, 16.8; **HRMS** *m/z* calculated for C<sub>24</sub>H<sub>27</sub>N<sub>3</sub>O<sub>7</sub>S [M+Na]<sup>+</sup>: 524.1462, found: 524.1464; **HPLC** (Daicel Chirapak IA column, hexane/isopropanol = 45/55, flow 0.5 mL/min, detection at 214 nm) retention time = 17.30 min (major) and 29.38 min (minor).

## 7. Transformations

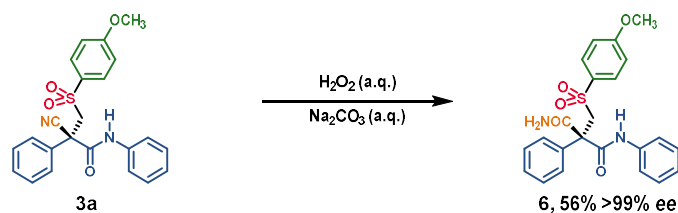

In a vial, **3a** (42.6 mg, 0.1 mmol, 1.0 equiv.) was dissolved in 1 mL of MeOH. Then H<sub>2</sub>O<sub>2</sub> (0.15 mL, 30% aqueous solution) and 3 drops of sat. Na<sub>2</sub>CO<sub>3</sub> solution were added

sequentially. The reaction mixture was stirred at room temperature for overnight. The aqueous layer was extracted with ethyl acetate for 3 times. The combined organic layers were concentrated under reduced pressure. The residue was purified by column chromatography (PE/ EA = 2/1) to afford **6** (49 mg, 56%, >99% ee) as a white solid.  $[\alpha]_D^{16} = +37.3$  (c = 0.89, CHCl<sub>3</sub>); **<sup>1</sup>H NMR (400 MHz, DMSO-*d*<sub>6</sub>)** δ 11.65 (s, 1H), 8.00 (s, 1H), 7.79 (s, 1H), 7.73 (d, *J* = 8.8 Hz, 2H), 7.43 – 7.38 (m, 4H), 7.36 – 7.26 (m, 5H), 7.10 – 7.06 (m, 1H), 7.01 (d, *J* = 8.8 Hz, 2H), 4.76 (d, *J* = 14.4 Hz, 1H), 4.67 (d, *J* = 14.4 Hz, 1H), 3.75 (s, 3H); **<sup>13</sup>C NMR (100 MHz, DMSO-*d*<sub>6</sub>)** δ 172.9, 167.4, 163.1, 139.2, 138.1, 132.3, 130.0, 128.71, 128.66, 127.8, 126.1, 123.9, 119.9, 114.2, 59.6, 56.7, 55.7; **HRMS** *m/z* calculated for C<sub>23</sub>H<sub>22</sub>N<sub>2</sub>O<sub>5</sub>S [M+Na]<sup>+</sup>: 461.1142, found: 461.1144; **HPLC** (Daicel Chirapak IA column, hexane/isopropanol = 45/55, flow 0.5 mL/min, detection at 214 nm) retention time = 16.07 min (minor) and 20.49 min (major).

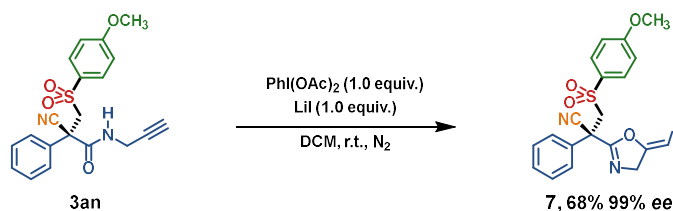

In a vial, **3an** (42.6 mg, 0.1 mmol, 1.0 equiv.), 0.1 mmol PhI(OAc)<sub>2</sub>, 0.1 mmol Lil and 1 mL CH<sub>2</sub>Cl<sub>2</sub> were added under argon atmosphere. The reaction mixture was stirred at room temperature until complete disappearance of the starting material as shown by TLC (usually 12 h). CH<sub>2</sub>Cl<sub>2</sub> (10 mL) was then added, and the mixture was washed with aqueous Na<sub>2</sub>S<sub>2</sub>O<sub>3</sub>. The organic layer was dried by Na<sub>2</sub>SO<sub>4</sub> and concentrated to give crude residue, which was purified by flash column chromatography to give the corresponding products **7** (69 mg, 68%, 99% ee) as a white solid.  $[\alpha]_D^{10} = +37.6$  (c = 0.33, CHCl<sub>3</sub>); **<sup>1</sup>H NMR (400 MHz, DMSO-*d*<sub>6</sub>)** δ 7.75 (d, *J* = 9.2 Hz, 2H), 7.52 – 7.50 (m, 2H), 7.44 – 7.41 (m, 3H), 7.11 (d, *J* = 8.8 Hz, 2H), 5.85 (t, *J* = 3.2 Hz, 1H), 4.68 (d, *J* = 15.2 Hz, 1H), 4.51 (d, *J* = 15.2 Hz, 1H), 4.47 – 4.30 (m, 2H), 3.86 (s, 3H); **<sup>13</sup>C NMR (100 MHz, DMSO-*d*<sub>6</sub>)** δ 163.7, 160.6, 156.1, 132.5, 130.4, 130.3, 129.6, 129.4, 126.4, 115.9, 114.4, 59.9, 57.8, 55.9, 51.3, 44.3; **HRMS** *m/z* calculated for C<sub>20</sub>H<sub>17</sub>IN<sub>2</sub>O<sub>4</sub>S [M+Na]<sup>+</sup>: 530.9846, found: 530.9846; **HPLC** (Daicel Chirapak IA column, hexane/isopropanol = 45/55, flow 0.5 mL/min, detection at 214 nm) retention time = 18.86 min (minor) and 39.05 min (major).

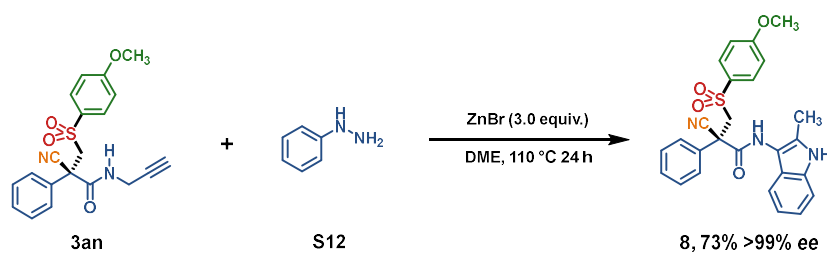

In a vial, a solution of **3an** (0.1 mmol) and arylhydrazine (0.15 mmol) in 1,2-dimethoxyethane (1 mL), zinc bromide (0.3 mmol) was added under argon atmosphere. The reaction mixture was heated at 110 °C for 24 h (TLC control). After removal of the solvent, the crude product was purified by column chromatography (PE/EA = 2/1) to afford **8** (69 mg, 73%, >99% ee) as a white solid.  $[\alpha]_{\text{D}}^{15} = +30.8$  ( $c = 0.34$ ,  $\text{CHCl}_3$ ); **<sup>1</sup>H NMR (400 MHz, DMSO-*d*<sub>6</sub>)**  $\delta$  10.92 (s, 1H), 9.59 (s, 1H), 7.78 (d,  $J = 9.2$  Hz, 2H), 7.60 – 7.57 (m, 2H), 7.47 – 7.41 (m, 3H), 7.23 (d,  $J = 8.0$  Hz, 1H), 7.10 (d,  $J = 9.2$  Hz, 2H), 7.06 (d,  $J = 7.6$  Hz, 1H), 7.00 – 6.96 (m, 1H), 6.91 – 6.87 (m, 1H), 4.69 (d,  $J = 14.8$  Hz, 1H), 4.50 (d,  $J = 14.8$  Hz, 1H), 3.85 (s, 3H), 2.11 (s, 3H); **<sup>13</sup>C NMR (100 MHz, DMSO-*d*<sub>6</sub>)**  $\delta$  164.2, 163.4, 133.9, 133.5, 131.8, 130.6, 130.1, 129.0, 126.3, 124.7, 120.4, 118.5, 117.6, 117.1, 114.4, 110.7, 108.9, 59.4, 55.8, 50.2, 10.8; **HRMS *m/z*** calculated for  $\text{C}_{26}\text{H}_{23}\text{N}_3\text{O}_4\text{S}$   $[\text{M}+\text{Na}]^+$ : 496.1301, found: 496.1302; **HPLC** (Daicel Chirapak IA column, hexane/isopropanol = 45/55, flow 0.5 mL/min, detection at 214 nm) retention time = 20.43 min (major) and 28.56 min (minor).

## 8. Mechanistic Experiments

a) Radical trapping experiment with 1,1-diphenylethylene

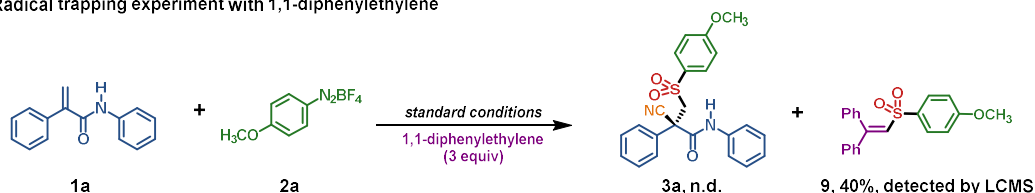

In the argon glovebox,  $\text{Cu}(\text{OAc})_2$  (3.6 mg, 10.0 mol%) and **L6** (16.5 mg 12.0 mol%) were dissolved in DCM (2.5 mL) in a dried sealed vial under argon atmosphere, and the mixture was stirred for 30 minutes. Then **1a** (0.2 mmol, 1.0 equiv.), **2a** (0.3 mmol, 1.5 equiv.), TMS-CN (0.3 mmol, 1.5 equiv.),  $\text{CH}_3\text{COOLi}$  (0.5 mmol, 2.5 equiv.), 1,1-diphenylethylene (0.6 mmol, 3.0 equiv.) and the mixture were added to chamber B. Tetrabromothiophene S,S-dioxides (0.88 mmol, 380 mg) in tetradecane (1.0 mL) was added to chamber A, followed by addition of 4-methylphenylene (0.80 mmol, 105  $\mu\text{l}$ ). The chamber A was sealed and removed out of the glovebox and heated to 100 °C in heating mantle for 10 min. Then chamber B heated to 20 °C in low-temperature stirring reaction bath for 72 hours. After 72 hours, two chamber was cooled to room temperature. TLC, GC and LC-MS analysis



demonstrated the product **3a** was not detected. The arylsulfonyl radical combined with 1,1-diphenylethylene **9** was detected by LC-MS. **<sup>1</sup>H NMR (400 MHz, DMSO-d<sub>6</sub>)** δ 7.55 – 7.51 (m, 2H), 7.43 – 7.33 (m, 6H), 7.31 (s, 1H), 7.24 – 7.22 (m, 2H), 7.04 – 7.00 (m, 4H), 3.82 (s, 3H). **<sup>13</sup>C NMR (101 MHz, DMSO-d<sub>6</sub>)** δ 162.9, 152.9, 138.6, 135.6, 133.0, 130.3, 129.5, 129.2, 129.0, 128.7, 128.6, 128.1, 127.9, 114.4, 55.8.

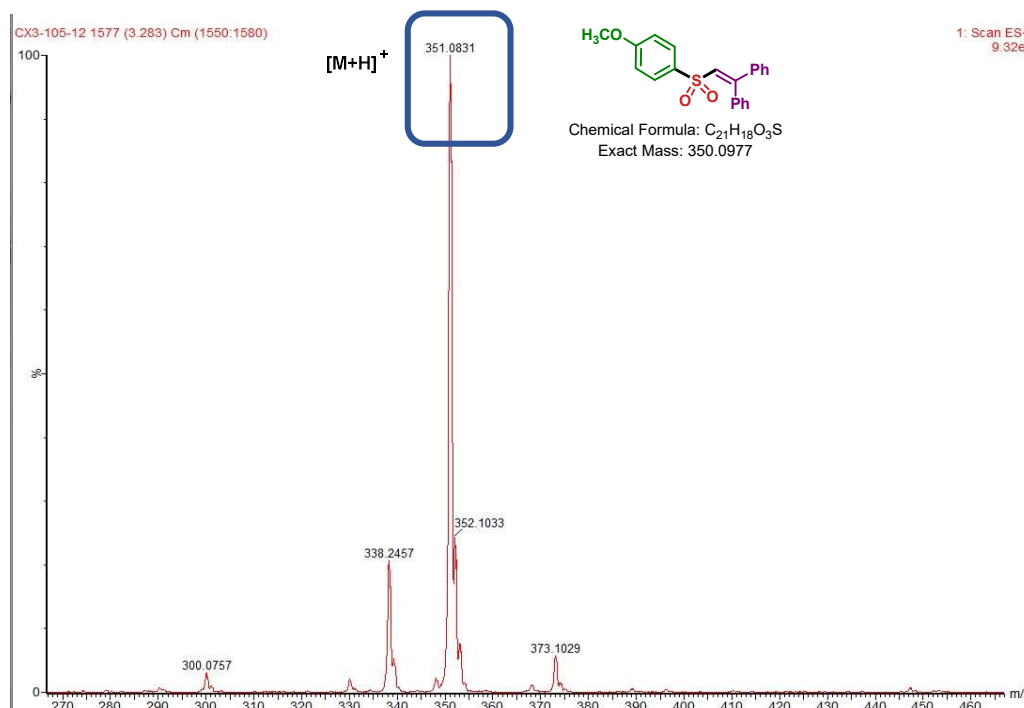

b) Radical trapping experiment with BHT

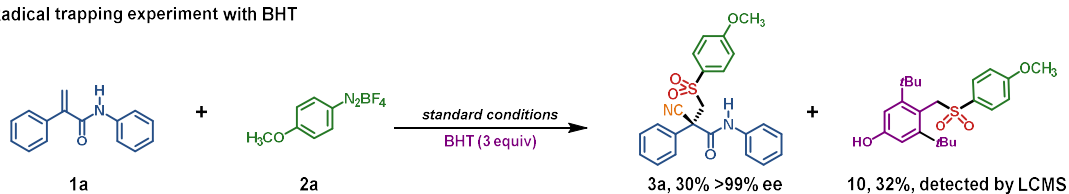

In the argon glovebox, Cu(OAc)<sub>2</sub> (3.6 mg, 10.0 mol%) and **L6** (16.5 mg 12.0 mol%) were dissolved in DCM (2.5 mL) in a dried sealed vial under argon atmosphere, and the mixture was stirred for 30 minutes. Then **1** (0.2 mmol, 1.0 equiv.), **2** (0.3 mmol, 1.5 equiv.), TMSCN (0.3 mmol, 1.5 equiv.), CH<sub>3</sub>COOLi (0.5 mmol, 2.5 equiv.), BHT (0.6 mmol, 3.0 equiv.) and the mixture were added to chamber B. Tetrabromothiophene S,S-dioxides (0.88 mmol, 380 mg) in tetradecane (1.0 mL) was added to chamber A, followed by addition of 4-methylphenylene (0.80 mmol, 105 μl). The chamber A was sealed and removed out of the glovebox and heated to 100 °C in heating mantle for 10 min. Then chamber B heated to 20 °C in low-temperature stirring reaction bath for 72 hours. After 72 hours, two chamber was cooled to room temperature. The mixture was purified by column chromatography on silica gel. Isolated as white solid using ethyl acetate/petroleum ether (1:3) as eluent (25

mg, 30% yield, >99% ee). The arylsulfonyl radical combined with BHT **10** was detected by LC-MS.  $^1\text{H NMR}$  (400 MHz, DMSO- $d_6$ )  $\delta$  7.50 (d,  $J = 8.8$  Hz, 2H), 7.05 (d,  $J = 8.8$  Hz, 2H), 7.00 (s, 1H), 6.72 (s, 2H), 4.40 (s, 2H), 3.82 (s, 3H), 1.26 (s, 18H).  $^{13}\text{C NMR}$  (101 MHz, DMSO- $d_6$ )  $\delta$  163.2, 154.0, 138.7, 130.6, 129.7, 127.4, 120.0, 114.2, 61.7, 55.8, 34.3, 30.2.

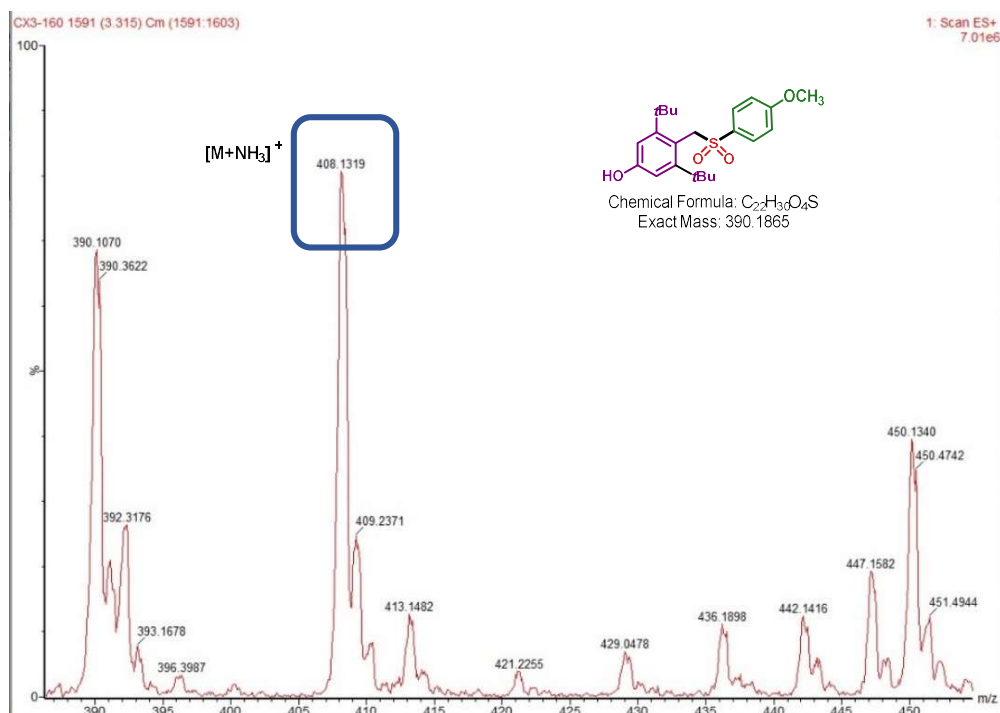

## 9. Reference

- [1] L. Wu, F. Wang, P. Chen and G. Liu, *J. Am. Chem. Soc.* **2019**, *141*, 1887-1892.
- [2] L. Wu, Z. Zhang, D. Wu, F. Wang, P. Chen, Z. Lin and G. Liu, *Angew. Chem. Int. Ed.* **2021**, *60*, 6997-7001.
- [3] M. V. Popescu, A. Mekereeya, J. V. Alegre-Requena, R. S. Paton and M. D. Smith, *Angew. Chem. Int. Ed.* **2020**, *59*, 23020-23024.
- [4] L. Cardinale, M. O. Konev and A. Jacobi von Wangelin, *Chem. Eur. J.* **2020**, *26*, 8239-8243.
- [5] Y. Liu, Q. Pan, X. Hu, Y. Guo, Q.-Y. Chen and C. Liu, *Org. Lett.* **2021**, *23*, 3975-3980.
- [6] T. Zhong, M.-K. Pang, Z.-D. Chen, B. Zhang, J. Weng and G. Lu, *Org. Lett.* **2020**, *22*, 3072-3078.
- [7] N. Miwa, C. Tanaka, S. Ishida, G. Hirata, J. Song, T. Torigoe, Y. Kuninobu and T. Nishikata, *J. Am. Chem. Soc.* **2020**, *142*, 1692-1697.
- [8] S. Bhor, G. Anilkumar, M. K. Tse, M. Klawonn, C. Dobler, B. Bitterlich, A. Grotevendt and M. Beller, *Org. Lett.* **2005**, *7*, 3393-3396.

## 10. HRMS detection of intermediates

Electrospray ionization high-resolution mass spectra (ESI-HRMS) were recorded on a Bruke P-SIMS-Gly FT-ICR mass spectrometer. The reaction ran for 3 hours. After the 3 hours, 10  $\mu\text{L}$  of reaction sample was extracted with a syringe, diluted into 1 mL of methanol, and transferred to a 0.5 mL syringe for immediate infusion into the mass spectrometer.

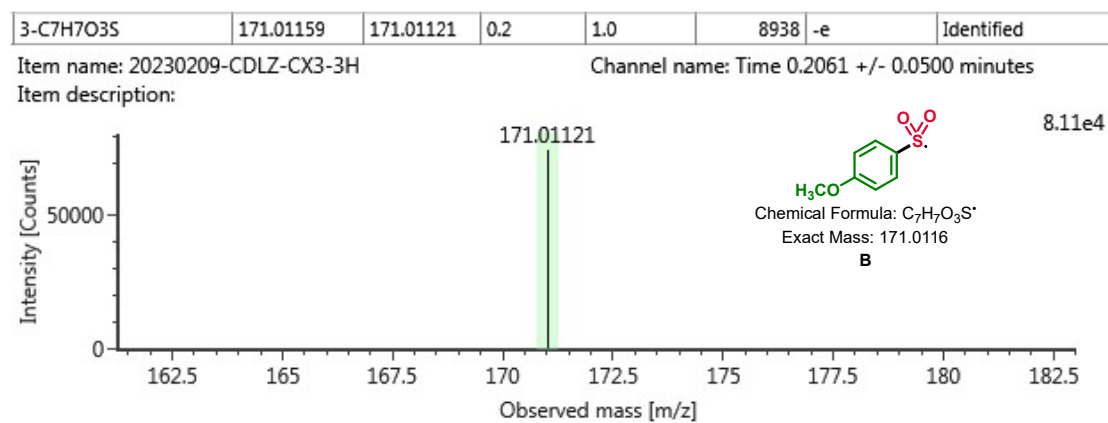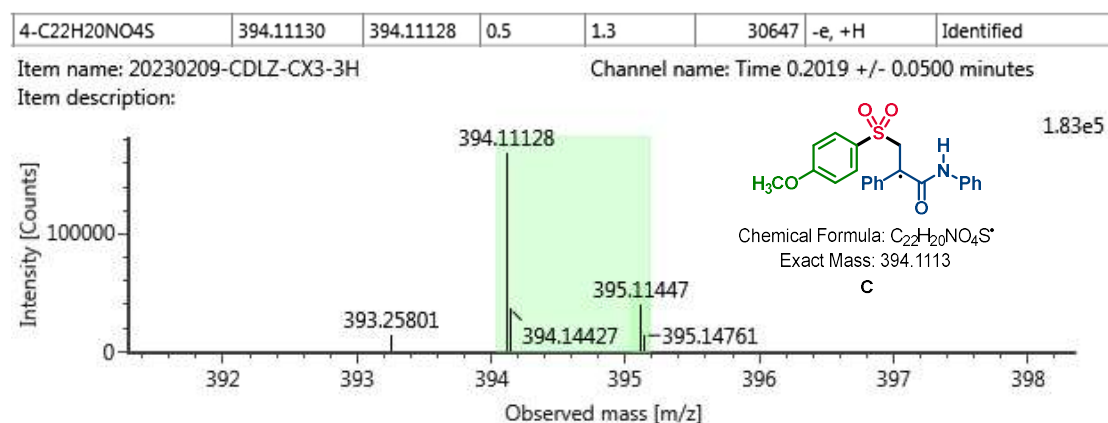

## 11. Single Crystal X-Ray Diffraction Data

Crystal data and structure refinement for **3a** (CCDC 2214049), Thermal ellipsoids are shown at 50% probability level.

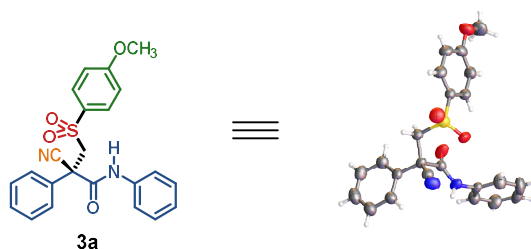

A suitable crystal of compound **3a** was obtained by slowly evaporating a mixture of petroleum ether and ethyl acetate solution at ambient temperature. It was selected and analyzed on a Bruker APEX-II CCD diffractometer. The crystal was kept at 302.0 K during data collection. Using Olex2,<sup>[9]</sup> the structure was solved with the SHELXT<sup>[10]</sup> structure solution program using Charge Flipping and refined with the SHELXL<sup>[11]</sup> refinement package using Least Squares minimisation.

Crystal Data for C<sub>23</sub>H<sub>20</sub>N<sub>2</sub>O<sub>4</sub>S (M = 420.47 g/mol): orthorhombic, space group P2<sub>1</sub>2<sub>1</sub>2<sub>1</sub> (no. 19), a = 10.1780(12) Å, b = 10.3013(13) Å, c = 19.462(3) Å, V = 2040.6(5) Å<sup>3</sup>, Z = 4, T = 302.0 K,  $\mu(\text{MoK}\alpha) = 0.192 \text{ mm}^{-1}$ , D<sub>calc</sub> = 1.369 g/cm<sup>3</sup>, 9227 reflections measured (4.186° ≤ 2 $\theta$  ≤ 55.03°), 4458 unique (R<sub>int</sub> = 0.0556, R<sub>sigma</sub> = 0.0847) which were used in all calculations. The final R<sub>1</sub> was 0.0559 (I > 2 $\sigma$ (I)) and wR<sub>2</sub> was 0.1171.

**Table S6 Crystal data and structure refinement for 3a**

|                                  |                                                                 |
|----------------------------------|-----------------------------------------------------------------|
| Identification code              | mo_lz_hcx_0622_3_0m_a                                           |
| Empirical formula                | C <sub>23</sub> H <sub>20</sub> N <sub>2</sub> O <sub>4</sub> S |
| Formula weight                   | 420.47                                                          |
| Temperature/K                    | 302.0                                                           |
| Crystal system                   | orthorhombic                                                    |
| Space group                      | P2 <sub>1</sub> 2 <sub>1</sub> 2 <sub>1</sub>                   |
| a/Å                              | 10.1780(12)                                                     |
| b/Å                              | 10.3013(13)                                                     |
| c/Å                              | 19.462(3)                                                       |
| $\alpha$ /°                      | 90                                                              |
| $\beta$ /°                       | 90                                                              |
| $\gamma$ /°                      | 90                                                              |
| Volume/Å <sup>3</sup>            | 2040.6(5)                                                       |
| Z                                | 4                                                               |
| $\rho_{\text{calc}}/\text{cm}^3$ | 1.369                                                           |
| $\mu/\text{mm}^{-1}$             | 0.192                                                           |

|                                             |                                                               |
|---------------------------------------------|---------------------------------------------------------------|
| F(000)                                      | 880.0                                                         |
| Crystal size/mm <sup>3</sup>                | 0.13 × 0.13 × 0.07                                            |
| Radiation                                   | MoK $\alpha$ ( $\lambda$ = 0.71073)                           |
| 2 $\theta$ range for data collection/°      | 4.186 to 55.03                                                |
| Index ranges                                | -13 ≤ h ≤ 13, -13 ≤ k ≤ 9, -25 ≤ l ≤ 22                       |
| Reflections collected                       | 9227                                                          |
| Independent reflections                     | 4458 [R <sub>int</sub> = 0.0556, R <sub>sigma</sub> = 0.0847] |
| Data/restraints/parameters                  | 4458/0/272                                                    |
| Goodness-of-fit on F <sup>2</sup>           | 1.032                                                         |
| Final R indexes [ $I \geq 2\sigma(I)$ ]     | R <sub>1</sub> = 0.0559, wR <sub>2</sub> = 0.0943             |
| Final R indexes [all data]                  | R <sub>1</sub> = 0.1123, wR <sub>2</sub> = 0.1171             |
| Largest diff. peak/hole / e Å <sup>-3</sup> | 0.17/-0.24                                                    |
| Flack parameter                             | 0.01(10)                                                      |

**Table S7 Fractional Atomic Coordinates (×104) and Equivalent Isotropic Displacement Parameters (Å<sup>2</sup>×103) for 3a. U<sub>eq</sub> is defined as 1/3 of of the trace of the orthogonalised U<sub>ij</sub> tensor.**

| Atom | x          | y          | z          | U(eq)    |
|------|------------|------------|------------|----------|
| S1   | 5216.2(11) | 4838.6(12) | 3616.0(7)  | 48.1(3)  |
| C5   | -892(5)    | 3409(7)    | 4637(3)    | 79(2)    |
| O2   | 4870(3)    | 7209(4)    | 4874.8(16) | 61.5(10) |
| O3   | 5645(3)    | 4277(4)    | 2979.7(19) | 64.4(11) |
| O4   | 5910(3)    | 4524(4)    | 4238.7(18) | 57.6(10) |
| N1   | 7004(3)    | 6892(4)    | 5142.5(18) | 47.0(11) |
| N2   | 8586(4)    | 6080(4)    | 3621(3)    | 64.3(13) |
| O1   | -262(4)    | 3267(4)    | 3999(2)    | 69.1(11) |
| C2   | 1000(5)    | 3671(5)    | 3952(3)    | 51.2(13) |
| C3   | 1751(5)    | 4089(5)    | 4500(3)    | 54.6(14) |
| C4   | 3040(5)    | 4466(5)    | 4393(3)    | 49.8(13) |
| C1   | 3563(4)    | 4430(4)    | 3739(3)    | 43.7(11) |
| C6   | 5267(5)    | 6579(4)    | 3509(2)    | 46.5(12) |
| C7   | 6379(4)    | 7218(5)    | 3931(2)    | 38.4(11) |
| C8   | 6019(4)    | 7095(5)    | 4707(2)    | 41.7(11) |
| C9   | 6784(4)    | 6597(5)    | 5852(2)    | 41.8(12) |
| C10  | 6846(5)    | 5340(6)    | 6076(3)    | 65.8(16) |
| C11  | 6701(6)    | 5069(7)    | 6762(3)    | 73.6(17) |
| C12  | 6463(5)    | 6044(7)    | 7222(3)    | 65.0(17) |
| C13  | 2802(5)    | 4055(5)    | 3186(3)    | 53.6(14) |
| C14  | 1528(5)    | 3676(5)    | 3291(3)    | 56.7(14) |
| C15  | 6523(4)    | 8672(5)    | 3764(2)    | 42.6(11) |
| C16  | 5440(5)    | 9435(5)    | 3645(3)    | 53.9(13) |
| C17  | 5583(6)    | 10746(5)   | 3509(3)    | 64.3(15) |
| C18  | 6793(6)    | 11311(6)   | 3503(3)    | 68.3(16) |

|     |         |          |         |          |
|-----|---------|----------|---------|----------|
| C19 | 7884(6) | 10559(5) | 3637(3) | 66.0(15) |
| C20 | 7759(5) | 9244(5)  | 3764(3) | 51.1(13) |
| C21 | 6526(5) | 7568(5)  | 6310(3) | 55.2(13) |
| C22 | 6366(5) | 7273(7)  | 6999(3) | 64.3(16) |
| C23 | 7623(4) | 6566(5)  | 3767(2) | 43.8(12) |

**Table S8 Anisotropic Displacement Parameters ( $\text{\AA}^2 \times 10^3$ ) for 3a. The Anisotropic displacement factor exponent takes the form:  $-2\pi^2[h^2a^{*2}U_{11}+2hka^*b^*U_{12}+\dots]$ .**

| Atom | U11      | U22     | U33     | U23      | U13       | U12      |
|------|----------|---------|---------|----------|-----------|----------|
| S1   | 41.2(6)  | 51.6(7) | 51.4(8) | 0.3(7)   | -3.0(6)   | 0.3(6)   |
| C5   | 52(3)    | 104(5)  | 80(5)   | 19(4)    | 11(3)     | -18(3)   |
| O2   | 35.1(17) | 104(3)  | 45(2)   | 14(2)    | 4.4(15)   | 9.0(19)  |
| O3   | 60(2)    | 73(3)   | 61(2)   | -16(2)   | 13.4(18)  | 8(2)     |
| O4   | 45.7(18) | 61(3)   | 66(2)   | 11.8(19) | -16.6(17) | -1.5(17) |
| N1   | 31.1(18) | 74(3)   | 36(2)   | 6(2)     | 2.5(17)   | 0(2)     |
| N2   | 52(2)    | 66(3)   | 76(3)   | -14(3)   | 9(3)      | 3(2)     |
| O1   | 49.3(19) | 75(3)   | 83(3)   | 3(2)     | -2(2)     | -20(2)   |
| C2   | 45(3)    | 42(3)   | 66(4)   | 3(3)     | -2(3)     | -5(2)    |
| C3   | 51(3)    | 67(4)   | 46(3)   | 10(3)    | 0(3)      | -10(3)   |
| C4   | 50(3)    | 58(3)   | 41(3)   | 2(2)     | -7(2)     | -9(2)    |
| C1   | 44(2)    | 44(3)   | 43(3)   | 4(2)     | -3(2)     | 0(2)     |
| C6   | 45(2)    | 51(3)   | 44(3)   | 4(2)     | -7(2)     | -3(2)    |
| C7   | 33(2)    | 47(3)   | 36(3)   | 2(2)     | -0.7(19)  | 1(2)     |
| C8   | 37(2)    | 46(3)   | 43(3)   | 7(2)     | 2(2)      | 0(2)     |
| C9   | 34(2)    | 57(3)   | 34(3)   | 9(2)     | -1(2)     | 2(2)     |
| C10  | 84(4)    | 59(4)   | 55(4)   | 1(3)     | 10(3)     | 9(3)     |
| C11  | 87(4)    | 61(4)   | 74(4)   | 29(4)    | 14(3)     | 10(4)    |
| C12  | 55(3)    | 97(5)   | 43(3)   | 23(3)    | -3(3)     | 8(3)     |
| C13  | 52(3)    | 62(4)   | 47(3)   | -8(3)    | -5(3)     | -4(3)    |
| C14  | 54(3)    | 66(4)   | 50(3)   | -8(3)    | -12(3)    | -12(3)   |
| C15  | 48(3)    | 48(3)   | 31(3)   | 3(2)     | 0(2)      | 2(2)     |
| C16  | 52(3)    | 58(3)   | 52(3)   | 4(3)     | 6(3)      | 3(3)     |
| C17  | 77(4)    | 57(4)   | 59(4)   | 4(3)     | -1(3)     | 18(3)    |
| C18  | 90(4)    | 52(3)   | 63(4)   | 6(3)     | 8(3)      | -1(3)    |
| C19  | 74(3)    | 58(4)   | 66(4)   | 6(3)     | 4(3)      | -11(3)   |
| C20  | 49(3)    | 55(3)   | 50(3)   | 1(3)     | 3(2)      | -5(3)    |
| C21  | 59(3)    | 61(4)   | 45(3)   | 6(3)     | 4(3)      | -1(3)    |
| C22  | 73(4)    | 78(5)   | 42(3)   | -7(3)    | 2(3)      | 4(3)     |
| C23  | 44(3)    | 47(3)   | 40(3)   | -4(2)    | 0(2)      | -2(2)    |

**Table S9 Bond Lengths for 3a.**

| Atom | Atom | Length/\AA | Atom | Atom | Length/\AA |
|------|------|------------|------|------|------------|
| S1   | O3   | 1.435(4)   | C7   | C8   | 1.559(6)   |
| S1   | O4   | 1.440(3)   | C7   | C15  | 1.540(6)   |

|    |     |          |     |     |          |
|----|-----|----------|-----|-----|----------|
| S1 | C1  | 1.751(5) | C7  | C23 | 1.469(6) |
| S1 | C6  | 1.806(5) | C9  | C10 | 1.368(7) |
| C5 | O1  | 1.405(6) | C9  | C21 | 1.366(7) |
| O2 | C8  | 1.220(5) | C10 | C11 | 1.372(7) |
| N1 | C8  | 1.329(5) | C11 | C12 | 1.368(8) |
| N1 | C9  | 1.431(5) | C12 | C22 | 1.342(8) |
| N2 | C23 | 1.137(5) | C13 | C14 | 1.369(7) |
| O1 | C2  | 1.354(5) | C15 | C16 | 1.374(6) |
| C2 | C3  | 1.381(7) | C15 | C20 | 1.389(6) |
| C2 | C14 | 1.393(7) | C16 | C17 | 1.385(7) |
| C3 | C4  | 1.384(6) | C17 | C18 | 1.363(8) |
| C4 | C1  | 1.380(6) | C18 | C19 | 1.378(7) |
| C1 | C13 | 1.381(6) | C19 | C20 | 1.382(6) |
| C6 | C7  | 1.545(6) | C21 | C22 | 1.384(7) |

**Table S10 Bond Angles for 3a.**

| Atom | Atom | Atom | Angle/°  | Atom | Atom | Atom | Angle/°  |
|------|------|------|----------|------|------|------|----------|
| O3   | S1   | O4   | 119.1(2) | O2   | C8   | N1   | 124.6(4) |
| O3   | S1   | C1   | 108.3(2) | O2   | C8   | C7   | 118.4(4) |
| O3   | S1   | C6   | 107.0(2) | N1   | C8   | C7   | 117.0(4) |
| O4   | S1   | C1   | 107.6(2) | C10  | C9   | N1   | 120.1(5) |
| O4   | S1   | C6   | 107.8(2) | C21  | C9   | N1   | 120.3(5) |
| C1   | S1   | C6   | 106.4(2) | C21  | C9   | C10  | 119.6(5) |
| C8   | N1   | C9   | 122.0(4) | C9   | C10  | C11  | 119.8(6) |
| C2   | O1   | C5   | 117.4(4) | C12  | C11  | C10  | 120.5(6) |
| O1   | C2   | C3   | 124.7(5) | C22  | C12  | C11  | 119.5(5) |
| O1   | C2   | C14  | 115.4(5) | C14  | C13  | C1   | 119.6(5) |
| C3   | C2   | C14  | 119.9(4) | C13  | C14  | C2   | 120.3(5) |
| C2   | C3   | C4   | 119.7(5) | C16  | C15  | C7   | 121.0(4) |
| C1   | C4   | C3   | 119.8(5) | C16  | C15  | C20  | 118.9(5) |
| C4   | C1   | S1   | 119.3(4) | C20  | C15  | C7   | 120.0(4) |
| C4   | C1   | C13  | 120.7(4) | C15  | C16  | C17  | 120.4(5) |
| C13  | C1   | S1   | 120.0(4) | C18  | C17  | C16  | 120.9(5) |
| C7   | C6   | S1   | 112.5(3) | C17  | C18  | C19  | 119.1(5) |
| C6   | C7   | C8   | 108.0(3) | C18  | C19  | C20  | 120.7(5) |
| C15  | C7   | C6   | 111.9(4) | C19  | C20  | C15  | 119.9(5) |
| C15  | C7   | C8   | 107.8(4) | C9   | C21  | C22  | 119.6(5) |
| C23  | C7   | C6   | 108.7(4) | C12  | C22  | C21  | 120.8(6) |
| C23  | C7   | C8   | 112.1(4) | N2   | C23  | C7   | 177.9(6) |
| C23  | C7   | C15  | 108.4(4) |      |      |      |          |

**Table S11 Torsion Angles for 3a.**

| A  | B  | C   | D   | Angle/°  | A  | B  | C   | D   | Angle/°   |
|----|----|-----|-----|----------|----|----|-----|-----|-----------|
| S1 | C1 | C13 | C14 | 176.9(4) | C6 | C7 | C15 | C20 | -144.9(5) |



|    |     |     |     |          |     |     |     |     |           |
|----|-----|-----|-----|----------|-----|-----|-----|-----|-----------|
| S1 | C6  | C7  | C8  | -68.8(4) | C7  | C15 | C16 | C17 | 178.8(5)  |
| S1 | C6  | C7  | C15 | 172.7(3) | C7  | C15 | C20 | C19 | -177.8(5) |
| S1 | C6  | C7  | C23 | 53.0(5)  | C8  | N1  | C9  | C10 | 99.5(6)   |
| C5 | O1  | C2  | C3  | 6.9(8)   | C8  | N1  | C9  | C21 | -81.2(6)  |
| C5 | O1  | C2  | C14 | -        | C8  | C7  | C15 | C16 | -80.4(5)  |
|    |     |     |     | 171.7(5) |     |     |     |     |           |
| O3 | S1  | C1  | C4  | 158.6(4) | C8  | C7  | C15 | C20 | 96.6(5)   |
| O3 | S1  | C1  | C13 | -20.4(5) | C9  | N1  | C8  | O2  | 9.4(8)    |
| O3 | S1  | C6  | C7  | -        | C9  | N1  | C8  | C7  | -171.8(4) |
|    |     |     |     | 109.6(3) |     |     |     |     |           |
| O4 | S1  | C1  | C4  | 28.6(5)  | C9  | C10 | C11 | C12 | 1.6(9)    |
| O4 | S1  | C1  | C13 | -        | C9  | C21 | C22 | C12 | 0.0(8)    |
|    |     |     |     | 150.3(4) |     |     |     |     |           |
| O4 | S1  | C6  | C7  | 19.7(4)  | C10 | C9  | C21 | C22 | 1.8(7)    |
| N1 | C9  | C10 | C11 | 176.7(5) | C10 | C11 | C12 | C22 | 0.2(9)    |
| N1 | C9  | C21 | C22 | -        | C11 | C12 | C22 | C21 | -1.0(9)   |
|    |     |     |     | 177.5(4) |     |     |     |     |           |
| O1 | C2  | C3  | C4  | 179.2(5) | C14 | C2  | C3  | C4  | -2.3(8)   |
| O1 | C2  | C14 | C13 | -        | C15 | C7  | C8  | O2  | 83.7(5)   |
|    |     |     |     | 179.3(5) |     |     |     |     |           |
| C2 | C3  | C4  | C1  | 0.4(8)   | C15 | C7  | C8  | N1  | -95.2(5)  |
| C3 | C2  | C14 | C13 | 2.0(9)   | C15 | C16 | C17 | C18 | -1.4(9)   |
| C3 | C4  | C1  | S1  | -        | C16 | C15 | C20 | C19 | -0.8(8)   |
|    |     |     |     | 177.1(4) |     |     |     |     |           |
| C3 | C4  | C1  | C13 | 1.8(8)   | C16 | C17 | C18 | C19 | 0.0(9)    |
| C4 | C1  | C13 | C14 | -2.0(8)  | C17 | C18 | C19 | C20 | 1.0(10)   |
| C1 | S1  | C6  | C7  | 134.9(3) | C18 | C19 | C20 | C15 | -0.6(9)   |
| C1 | C13 | C14 | C2  | 0.1(8)   | C20 | C15 | C16 | C17 | 1.8(8)    |
| C6 | S1  | C1  | C4  | -86.7(4) | C21 | C9  | C10 | C11 | -2.6(8)   |
| C6 | S1  | C1  | C13 | 94.4(4)  | C23 | C7  | C8  | O2  | -157.0(5) |
| C6 | C7  | C8  | O2  | -37.3(6) | C23 | C7  | C8  | N1  | 24.1(6)   |
| C6 | C7  | C8  | N1  | 143.8(4) | C23 | C7  | C15 | C16 | 158.1(4)  |
| C6 | C7  | C15 | C16 | 38.2(6)  | C23 | C7  | C15 | C20 | -25.0(6)  |

**Table S12 Hydrogen Atom Coordinates ( $\text{\AA}\times 10^4$ ) and Isotropic Displacement Parameters ( $\text{\AA}^2\times 10^3$ ) for 3a.**

| Atom | x     | y    | z    | U(eq) |
|------|-------|------|------|-------|
| H5A  | -1800 | 3172 | 4592 | 118   |
| H5B  | -828  | 4295 | 4785 | 118   |
| H5C  | -478  | 2855 | 4969 | 118   |
| H1   | 7797  | 6940 | 4993 | 56    |
| H3   | 1392  | 4116 | 4939 | 66    |
| H4   | 3552  | 4742 | 4760 | 60    |
| H6A  | 5393  | 6780 | 3027 | 56    |

|     |      |       |      |    |
|-----|------|-------|------|----|
| H6B | 4431 | 6944  | 3650 | 56 |
| H10 | 6986 | 4670  | 5764 | 79 |
| H11 | 6766 | 4217  | 6915 | 88 |
| H12 | 6369 | 5857  | 7687 | 78 |
| H13 | 3152 | 4059  | 2745 | 64 |
| H14 | 1013 | 3422  | 2920 | 68 |
| H16 | 4605 | 9068  | 3657 | 65 |
| H17 | 4843 | 11248 | 3419 | 77 |
| H18 | 6882 | 12192 | 3411 | 82 |
| H19 | 8712 | 10940 | 3641 | 79 |
| H20 | 8502 | 8744  | 3849 | 61 |
| H21 | 6457 | 8422  | 6160 | 66 |
| H22 | 6190 | 7934  | 7311 | 77 |

Crystal data and structure refinement for **3aq** (CCDC 2267265), Thermal ellipsoids are shown at 50% probability level.

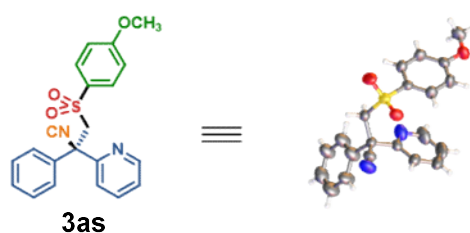

A suitable crystal of compound **3as** was obtained by slowly evaporating a mixture of petroleum ether and ethyl acetate solution at ambient temperature. It was selected and analyzed on a Xcalibur, Eos diffractometer. The crystal was kept at 293.15 K during data collection. Using Olex2,<sup>[9]</sup> the structure was solved with the ShelXT<sup>[10]</sup> structure solution program using Charge Flipping and refined with the ShelXL<sup>[11]</sup> refinement package using Least Squares minimisation.

**Crystal Data** for C<sub>21</sub>H<sub>18</sub>N<sub>2</sub>O<sub>3</sub>S (M = 378.43 g/mol): monoclinic, space group I2/a (no. 15), a = 16.5437(14) Å, b = 6.8832(5) Å, c = 33.016(3) Å, β = 97.208(9)°, V = 3729.9(5) Å<sup>3</sup>, Z = 8, T = 293.15 K, μ(MoKα) = 0.198 mm<sup>-1</sup>, D<sub>calc</sub> = 1.348 g/cm<sup>3</sup>, 8138 reflections measured (6.048° ≤ 2θ ≤ 52.734°), 3830 unique (R<sub>int</sub> = 0.0428, R<sub>sigma</sub> = 0.0783) which were used in all calculations. The final R<sub>1</sub> was 0.0918 (I > 2σ(I)) and wR<sub>2</sub> was 0.2422.

**Table S13 Crystal data and structure refinement for 3aq.**

|                     |                                                                 |
|---------------------|-----------------------------------------------------------------|
| Identification code | 230602_s2_hcx_auto                                              |
| Empirical formula   | C <sub>21</sub> H <sub>18</sub> N <sub>2</sub> O <sub>3</sub> S |
| Formula weight      | 378.43                                                          |

|                                             |                                                                |
|---------------------------------------------|----------------------------------------------------------------|
| Temperature/K                               | 293.15                                                         |
| Crystal system                              | monoclinic                                                     |
| Space group                                 | I2/a                                                           |
| a/Å                                         | 16.5437(14)                                                    |
| b/Å                                         | 6.8832(5)                                                      |
| c/Å                                         | 33.016(3)                                                      |
| $\alpha$ /°                                 | 90                                                             |
| $\beta$ /°                                  | 97.208(9)                                                      |
| $\gamma$ /°                                 | 90                                                             |
| Volume/Å <sup>3</sup>                       | 3729.9(5)                                                      |
| Z                                           | 8                                                              |
| $\rho_{\text{calc}}$ /cm <sup>3</sup>       | 1.348                                                          |
| $\mu$ /mm <sup>-1</sup>                     | 0.198                                                          |
| F(000)                                      | 1584.0                                                         |
| Crystal size/mm <sup>3</sup>                | 0.35 × 0.3 × 0.25                                              |
| Radiation                                   | MoK $\alpha$ ( $\lambda$ = 0.71073)                            |
| 2 $\theta$ range for data collection/°      | 6.048 to 52.734                                                |
| Index ranges                                | -13 ≤ h ≤ 20, -8 ≤ k ≤ 5, -40 ≤ l ≤ 41                         |
| Reflections collected                       | 8138                                                           |
| Independent reflections                     | 3830 [ $R_{\text{int}}$ = 0.0428, $R_{\text{sigma}}$ = 0.0783] |
| Data/restraints/parameters                  | 3830/1/233                                                     |
| Goodness-of-fit on F <sup>2</sup>           | 1.044                                                          |
| Final R indexes [ $ I  \geq 2\sigma(I)$ ]   | $R_1$ = 0.0918, $wR_2$ = 0.2070                                |
| Final R indexes [all data]                  | $R_1$ = 0.1444, $wR_2$ = 0.2422                                |
| Largest diff. peak/hole / e Å <sup>-3</sup> | 0.93/-0.91                                                     |

**Table S14 Fractional Atomic Coordinates ( $\times 10^4$ ) and Equivalent Isotropic Displacement Parameters ( $\text{\AA}^2 \times 10^3$ ) for 3aq.  $U_{\text{eq}}$  is defined as 1/3 of of the trace of the orthogonalised  $U_{\text{ij}}$  tensor.**

| Atom | x          | y          | z          | U(eq)    |
|------|------------|------------|------------|----------|
| S1   | 2167.1(7)  | 7362.0(18) | 3511.6(4)  | 43.2(4)  |
| O1   | 2195(2)    | 9379(5)    | 3399.5(10) | 52.2(9)  |
| N1   | 4350(3)    | 6872(8)    | 3925.7(14) | 67.9(14) |
| C1   | 3969(3)    | 8624(7)    | 3960.8(13) | 42.6(11) |
| O2   | 1385.7(19) | 6398(5)    | 3479.8(11) | 60.0(10) |
| N2   | 2551(3)    | 11976(7)   | 4219.5(16) | 76.1(15) |
| C2   | 4227(3)    | 10310(8)   | 3800.9(15) | 56.9(14) |
| O3   | 4121(2)    | 3153(5)    | 2434.7(11) | 59.4(10) |
| C3   | 4925(4)    | 10257(11)  | 3597.9(18) | 75.1(19) |
| C4   | 5319(3)    | 8543(14)   | 3563.5(18) | 81(2)    |

|     |         |          |            |          |
|-----|---------|----------|------------|----------|
| C5  | 5025(4) | 6914(11) | 3722.0(18) | 76.7(19) |
| C6  | 3237(3) | 8564(7)  | 4204.4(14) | 40.4(11) |
| C7  | 3555(4) | 8048(9)  | 4651.3(18) | 76.9(11) |
| C8  | 3810(4) | 9456(10) | 4928.7(17) | 79.8(19) |
| C9  | 4159(5) | 8968(13) | 5321(2)    | 93(2)    |
| C10 | 4230(4) | 7107(11) | 5429(2)    | 80(2)    |
| C11 | 3967(4) | 5733(10) | 5155.7(18) | 76.9(11) |
| C12 | 3624(4) | 6210(9)  | 4764.8(18) | 76.9(11) |
| C13 | 2847(3) | 10500(8) | 4204.6(16) | 52.8(13) |
| C14 | 2593(3) | 7061(7)  | 4029.9(14) | 43.6(11) |
| C15 | 2775(3) | 6049(7)  | 3208.8(13) | 37.6(10) |
| C16 | 2783(3) | 4055(7)  | 3217.5(15) | 48.2(12) |
| C17 | 3229(3) | 3041(7)  | 2962.7(15) | 49.8(13) |
| C18 | 3664(3) | 4011(7)  | 2698.5(13) | 42.6(11) |
| C19 | 3649(3) | 6027(7)  | 2687.3(15) | 56.9(14) |
| C20 | 3213(3) | 7023(7)  | 2947.0(16) | 53.8(13) |
| C21 | 4156(4) | 1095(8)  | 2428.3(17) | 62.4(15) |

**Table S15 Anisotropic Displacement Parameters ( $\text{\AA}^2 \times 10^3$ ) for 3aq. The Anisotropic displacement factor exponent takes the form:  $-2\pi^2[h^2a^2U_{11}+2hka^*b^*U_{12}+\dots]$ .**

| Atom | $U_{11}$ | $U_{22}$ | $U_{33}$ | $U_{23}$ | $U_{13}$ | $U_{12}$ |
|------|----------|----------|----------|----------|----------|----------|
| S1   | 37.4(6)  | 44.0(7)  | 48.5(7)  | -6.4(6)  | 6.9(5)   | 1.1(5)   |
| O1   | 61(2)    | 39.1(18) | 56(2)    | -2.7(16) | 4.2(17)  | 7.7(16)  |
| N1   | 57(3)    | 88(4)    | 61(3)    | 0(3)     | 16(2)    | 15(3)    |
| C1   | 38(2)    | 53(3)    | 36(2)    | -2(2)    | 4(2)     | -3(2)    |
| O2   | 36.3(18) | 69(2)    | 76(2)    | -19(2)   | 8.2(17)  | -6.0(17) |
| N2   | 103(4)   | 54(3)    | 70(3)    | -15(3)   | 7(3)     | 14(3)    |
| C2   | 60(3)    | 60(3)    | 52(3)    | 1(3)     | 10(3)    | -16(3)   |
| O3   | 74(3)    | 50(2)    | 59(2)    | -8.6(18) | 28(2)    | 6.1(19)  |
| C3   | 66(4)    | 106(5)   | 55(3)    | 1(4)     | 12(3)    | -39(4)   |
| C4   | 38(3)    | 149(7)   | 56(4)    | -8(4)    | 9(3)     | -17(4)   |
| C5   | 64(4)    | 105(5)   | 64(4)    | -6(4)    | 21(3)    | 29(4)    |
| C6   | 42(3)    | 40(2)    | 41(2)    | -2(2)    | 10(2)    | -6(2)    |
| C7   | 111(3)   | 64(2)    | 52.4(19) | -0.8(19) | 1(2)     | 5(2)     |
| C8   | 112(5)   | 71(4)    | 50(3)    | -1(3)    | -16(3)   | -16(4)   |
| C9   | 110(6)   | 110(6)   | 54(4)    | -8(4)    | -11(4)   | -16(5)   |
| C10  | 79(4)    | 108(6)   | 53(4)    | 11(4)    | 4(3)     | 14(4)    |
| C11  | 111(3)   | 64(2)    | 52.4(19) | -0.8(19) | 1(2)     | 5(2)     |
| C12  | 111(3)   | 64(2)    | 52.4(19) | -0.8(19) | 1(2)     | 5(2)     |
| C13  | 59(3)    | 48(3)    | 52(3)    | -14(3)   | 11(3)    | -3(3)    |

|     |       |       |       |       |         |       |
|-----|-------|-------|-------|-------|---------|-------|
| C14 | 46(3) | 44(3) | 42(3) | -2(2) | 13(2)   | -4(2) |
| C15 | 33(2) | 40(3) | 39(2) | -5(2) | 2.8(19) | -2(2) |
| C16 | 51(3) | 41(3) | 55(3) | 3(2)  | 17(2)   | -1(2) |
| C17 | 61(3) | 32(2) | 58(3) | 2(2)  | 16(3)   | 0(2)  |
| C18 | 47(3) | 43(3) | 39(2) | -7(2) | 7(2)    | 4(2)  |
| C19 | 78(4) | 44(3) | 56(3) | 3(3)  | 36(3)   | -3(3) |
| C20 | 67(3) | 38(3) | 59(3) | 1(2)  | 20(3)   | 1(2)  |
| C21 | 73(4) | 53(3) | 62(3) | -9(3) | 12(3)   | 14(3) |

**Table S16 Bond Lengths for 3aq.**

| Atom | Atom | Length/Å | Atom | Atom | Length/Å |
|------|------|----------|------|------|----------|
| S1   | O1   | 1.439(3) | C6   | C13  | 1.481(7) |
| S1   | O2   | 1.445(3) | C6   | C14  | 1.543(6) |
| S1   | C14  | 1.779(5) | C7   | C8   | 1.363(8) |
| S1   | C15  | 1.755(4) | C7   | C12  | 1.321(8) |
| N1   | C1   | 1.372(6) | C8   | C9   | 1.391(8) |
| N1   | C5   | 1.374(7) | C9   | C10  | 1.331(9) |
| C1   | C2   | 1.366(7) | C10  | C11  | 1.342(9) |
| C1   | C6   | 1.536(6) | C11  | C12  | 1.383(8) |
| N2   | C13  | 1.131(6) | C15  | C16  | 1.373(6) |
| C2   | C3   | 1.406(8) | C15  | C20  | 1.371(6) |
| O3   | C18  | 1.358(5) | C16  | C17  | 1.377(6) |
| O3   | C21  | 1.418(6) | C17  | C18  | 1.372(6) |
| C3   | C4   | 1.360(9) | C18  | C19  | 1.388(7) |
| C4   | C5   | 1.353(9) | C19  | C20  | 1.371(7) |
| C6   | C7   | 1.544(7) |      |      |          |

**Table S17 Bond Angles for 3aq.**

| Atom | Atom | Atom | Angle/°  | Atom | Atom | Atom | Angle/°  |
|------|------|------|----------|------|------|------|----------|
| O1   | S1   | O2   | 118.8(2) | C8   | C7   | C6   | 121.2(5) |
| O1   | S1   | C14  | 109.8(2) | C12  | C7   | C6   | 119.9(5) |
| O1   | S1   | C15  | 108.1(2) | C12  | C7   | C8   | 118.8(6) |
| O2   | S1   | C14  | 105.0(2) | C7   | C8   | C9   | 120.7(7) |
| O2   | S1   | C15  | 107.1(2) | C10  | C9   | C8   | 119.7(7) |
| C15  | S1   | C14  | 107.6(2) | C9   | C10  | C11  | 119.2(6) |
| C1   | N1   | C5   | 115.6(5) | C10  | C11  | C12  | 121.4(6) |
| N1   | C1   | C6   | 114.9(4) | C7   | C12  | C11  | 120.2(6) |
| C2   | C1   | N1   | 123.0(4) | N2   | C13  | C6   | 177.5(6) |
| C2   | C1   | C6   | 122.0(4) | C6   | C14  | S1   | 116.9(3) |
| C1   | C2   | C3   | 118.5(6) | C16  | C15  | S1   | 120.5(3) |

|     |    |     |          |     |     |     |          |
|-----|----|-----|----------|-----|-----|-----|----------|
| C18 | O3 | C21 | 118.1(4) | C20 | C15 | S1  | 119.6(4) |
| C4  | C3 | C2  | 119.6(6) | C20 | C15 | C16 | 119.8(4) |
| C5  | C4 | C3  | 119.2(6) | C15 | C16 | C17 | 119.9(4) |
| C4  | C5 | N1  | 124.1(6) | C18 | C17 | C16 | 120.4(4) |
| C1  | C6 | C7  | 108.0(4) | O3  | C18 | C17 | 125.1(4) |
| C1  | C6 | C14 | 112.0(4) | O3  | C18 | C19 | 115.3(4) |
| C13 | C6 | C1  | 110.4(4) | C17 | C18 | C19 | 119.6(4) |
| C13 | C6 | C7  | 107.6(4) | C20 | C19 | C18 | 119.5(5) |
| C13 | C6 | C14 | 108.9(4) | C15 | C20 | C19 | 120.7(5) |
| C14 | C6 | C7  | 109.8(4) |     |     |     |          |

**Table S18 Torsion Angles for 3aq.**

| <b>A</b> | <b>B</b> | <b>C</b> | <b>D</b> | <b>Angle<sup>o</sup></b> | <b>A</b> | <b>B</b> | <b>C</b> | <b>D</b> | <b>Angle<sup>o</sup></b> |
|----------|----------|----------|----------|--------------------------|----------|----------|----------|----------|--------------------------|
| S1       | C15      | C16      | C17      | 176.6(4)                 | C6       | C7       | C8       | C9       | -174.5(6)                |
| S1       | C15      | C20      | C19      | -175.6(4)                | C6       | C7       | C12      | C11      | 175.1(6)                 |
| O1       | S1       | C14      | C6       | -27.1(4)                 | C7       | C6       | C14      | S1       | -178.5(4)                |
| O1       | S1       | C15      | C16      | -172.3(4)                | C7       | C8       | C9       | C10      | -1.5(12)                 |
| O1       | S1       | C15      | C20      | 4.5(5)                   | C8       | C7       | C12      | C11      | -1.5(11)                 |
| N1       | C1       | C2       | C3       | -1.3(8)                  | C8       | C9       | C10      | C11      | 0.5(11)                  |
| N1       | C1       | C6       | C7       | 65.6(5)                  | C9       | C10      | C11      | C12      | 0.0(11)                  |
| N1       | C1       | C6       | C13      | -177.0(4)                | C10      | C11      | C12      | C7       | 0.6(11)                  |
| N1       | C1       | C6       | C14      | -55.5(5)                 | C12      | C7       | C8       | C9       | 2.0(11)                  |
| C1       | N1       | C5       | C4       | 0.4(9)                   | C13      | C6       | C7       | C8       | -30.9(8)                 |
| C1       | C2       | C3       | C4       | 0.4(8)                   | C13      | C6       | C7       | C12      | 152.6(6)                 |
| C1       | C6       | C7       | C8       | 88.3(7)                  | C13      | C6       | C14      | S1       | 63.9(4)                  |
| C1       | C6       | C7       | C12      | -88.2(7)                 | C14      | S1       | C15      | C16      | 69.2(4)                  |
| C1       | C6       | C14      | S1       | -58.5(5)                 | C14      | S1       | C15      | C20      | -114.0(4)                |
| O2       | S1       | C14      | C6       | -155.9(3)                | C14      | C6       | C7       | C8       | -149.3(6)                |
| O2       | S1       | C15      | C16      | -43.2(5)                 | C14      | C6       | C7       | C12      | 34.2(8)                  |
| O2       | S1       | C15      | C20      | 133.5(4)                 | C15      | S1       | C14      | C6       | 90.3(4)                  |
| C2       | C1       | C6       | C7       | -113.0(5)                | C15      | C16      | C17      | C18      | -0.3(8)                  |
| C2       | C1       | C6       | C13      | 4.5(6)                   | C16      | C15      | C20      | C19      | 1.2(8)                   |
| C2       | C1       | C6       | C14      | 126.0(5)                 | C16      | C17      | C18      | O3       | -179.9(5)                |
| C2       | C3       | C4       | C5       | 0.8(9)                   | C16      | C17      | C18      | C19      | -0.4(8)                  |
| O3       | C18      | C19      | C20      | -179.1(5)                | C17      | C18      | C19      | C20      | 1.4(8)                   |
| C3       | C4       | C5       | N1       | -1.2(10)                 | C18      | C19      | C20      | C15      | -1.8(8)                  |
| C5       | N1       | C1       | C2       | 0.9(7)                   | C20      | C15      | C16      | C17      | -0.1(8)                  |
| C5       | N1       | C1       | C6       | -177.6(4)                | C21      | O3       | C18      | C17      | 0.1(7)                   |
| C6       | C1       | C2       | C3       | 177.1(4)                 | C21      | O3       | C18      | C19      | -179.4(5)                |

**Table S19 Hydrogen Atom Coordinates ( $\text{\AA} \times 10^4$ ) and Isotropic Displacement Parameters ( $\text{\AA}^2 \times 10^3$ ) for 3aq.**

| Atom | x       | y        | z       | U(eq) |
|------|---------|----------|---------|-------|
| H2   | 3947.94 | 11468.08 | 3825.83 | 68    |
| H3   | 5114.99 | 11386.67 | 3487.74 | 90    |
| H4   | 5784.51 | 8490.65  | 3432.81 | 97    |
| H5   | 5296.34 | 5751.04  | 3691.07 | 92    |
| H8   | 3748.76 | 10757.11 | 4855.02 | 96    |
| H9   | 4342.72 | 9937.14  | 5506    | 112   |
| H10  | 4459.33 | 6763.78  | 5691    | 96    |
| H11  | 4015.5  | 4431.56  | 5230.8  | 92    |
| H12  | 3441.35 | 5233.24  | 4581.17 | 92    |
| H14A | 2151.81 | 7082.57  | 4197.37 | 52    |
| H14B | 2840.33 | 5781.72  | 4058.39 | 52    |
| H16  | 2487.37 | 3389.79  | 3395.23 | 58    |
| H17  | 3235.95 | 1690.71  | 2969.72 | 60    |
| H19  | 3932.35 | 6696.86  | 2505.09 | 68    |
| H20  | 3214.61 | 8374.14  | 2945.42 | 65    |
| H21A | 4462.31 | 680.68   | 2215.51 | 94    |
| H21B | 3613.12 | 579.71   | 2378.46 | 94    |
| H21C | 4414.96 | 631      | 2686.66 | 94    |

[9] Dolomanov, O.V., Bourhis, L.J., Gildea, R.J, Howard, J.A.K. & Puschmann, H. (2009), J. Appl. Cryst. 42, 339-341.

[10] Sheldrick, G.M. (2015). Acta Cryst. A71, 3-8.

[11] Sheldrick, G.M. (2015). Acta Cryst. C71, 3-8.

## 12. The spectrums of NMR and HPLC chromatograms

### NMR of Compound of 3a

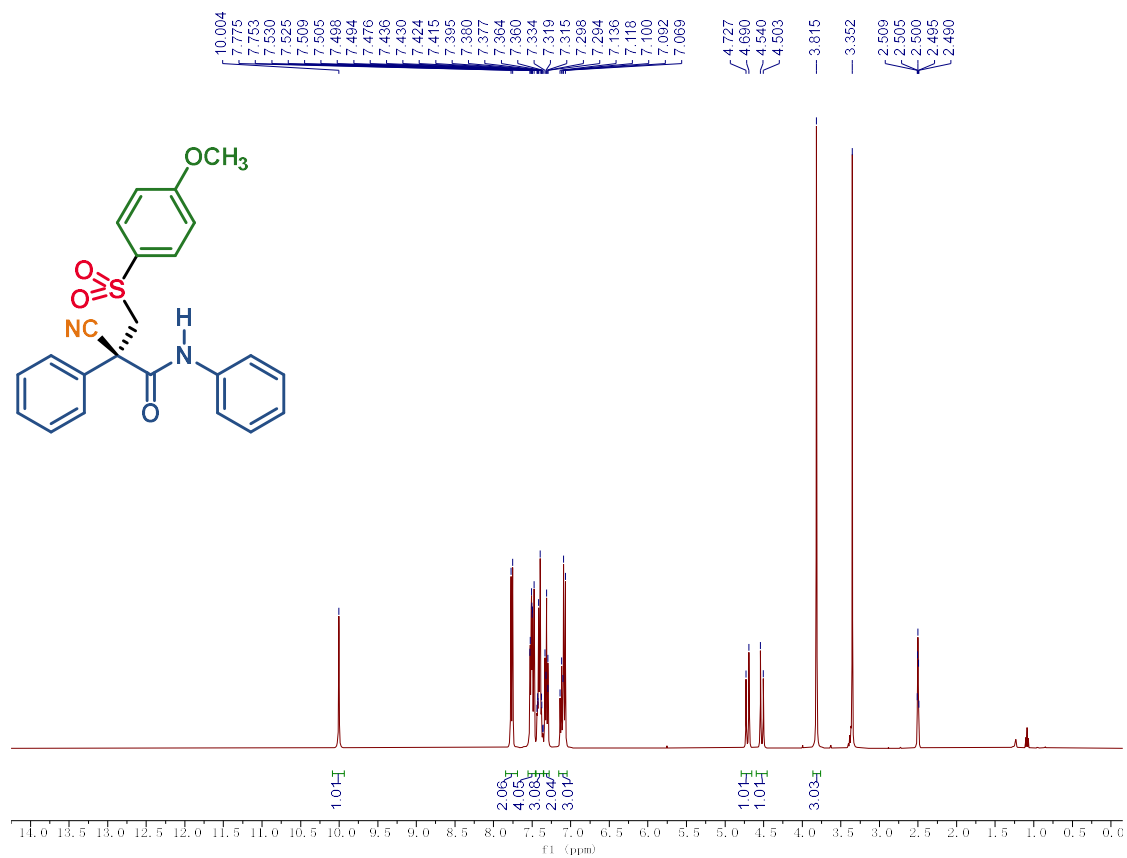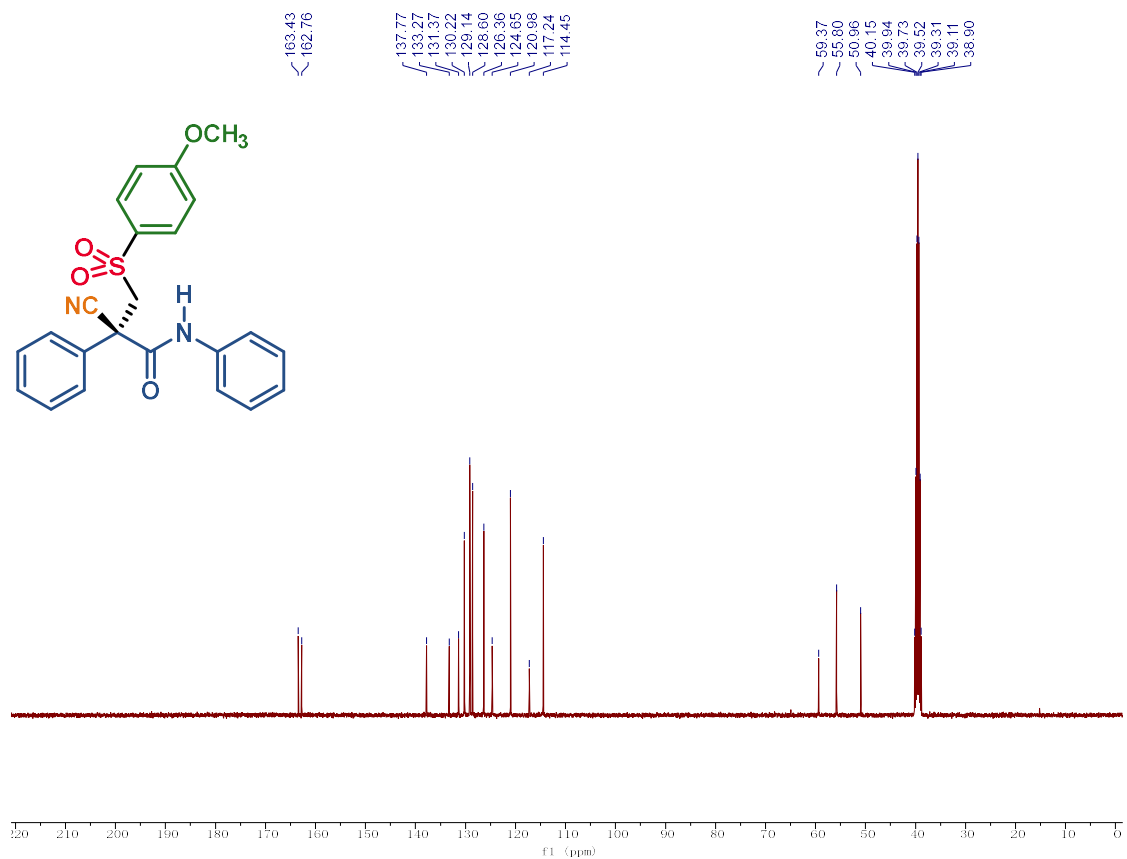



### NMR of Compound of 3b

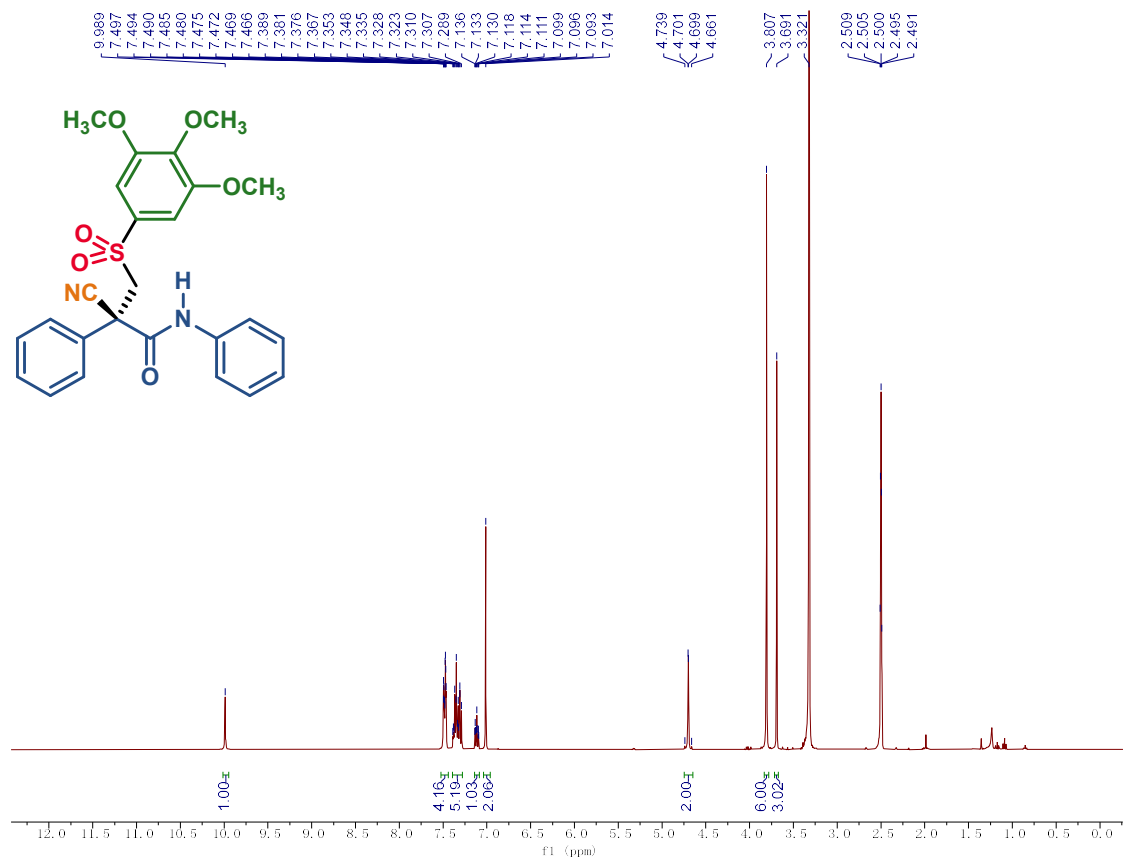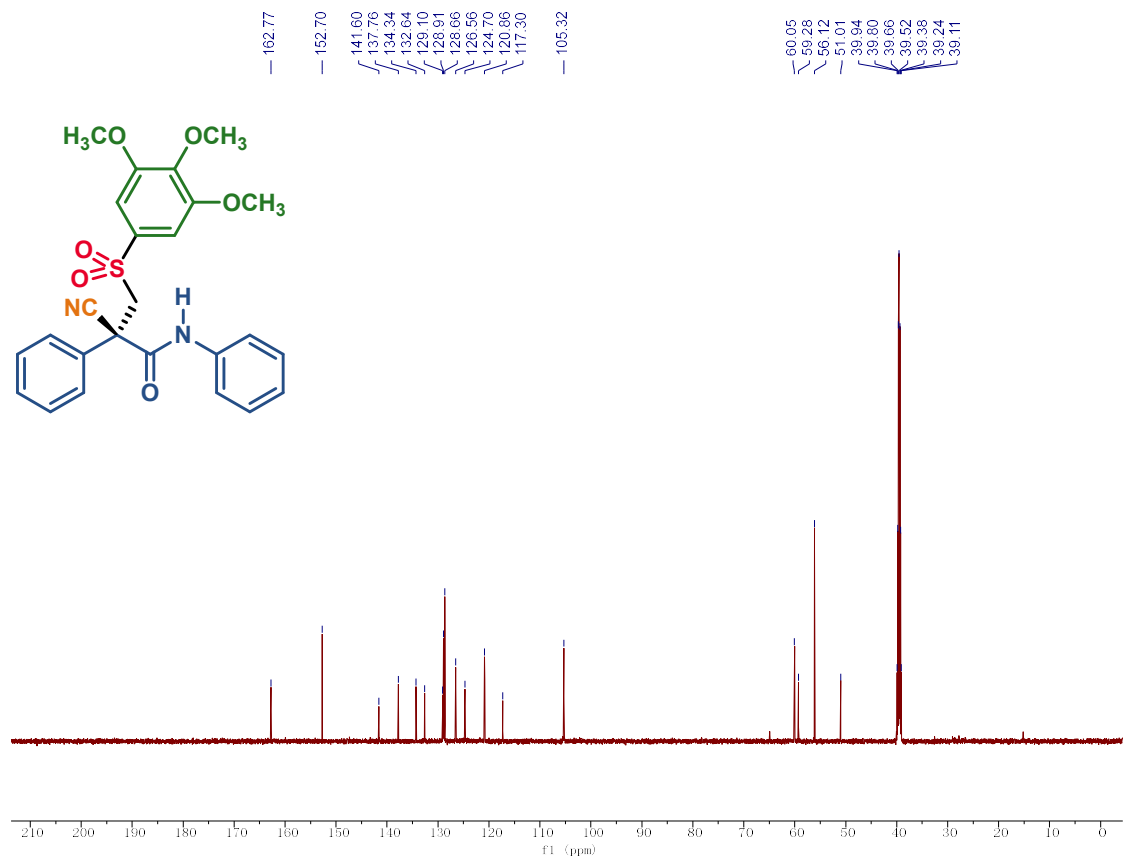

### NMR of Compound of 3c

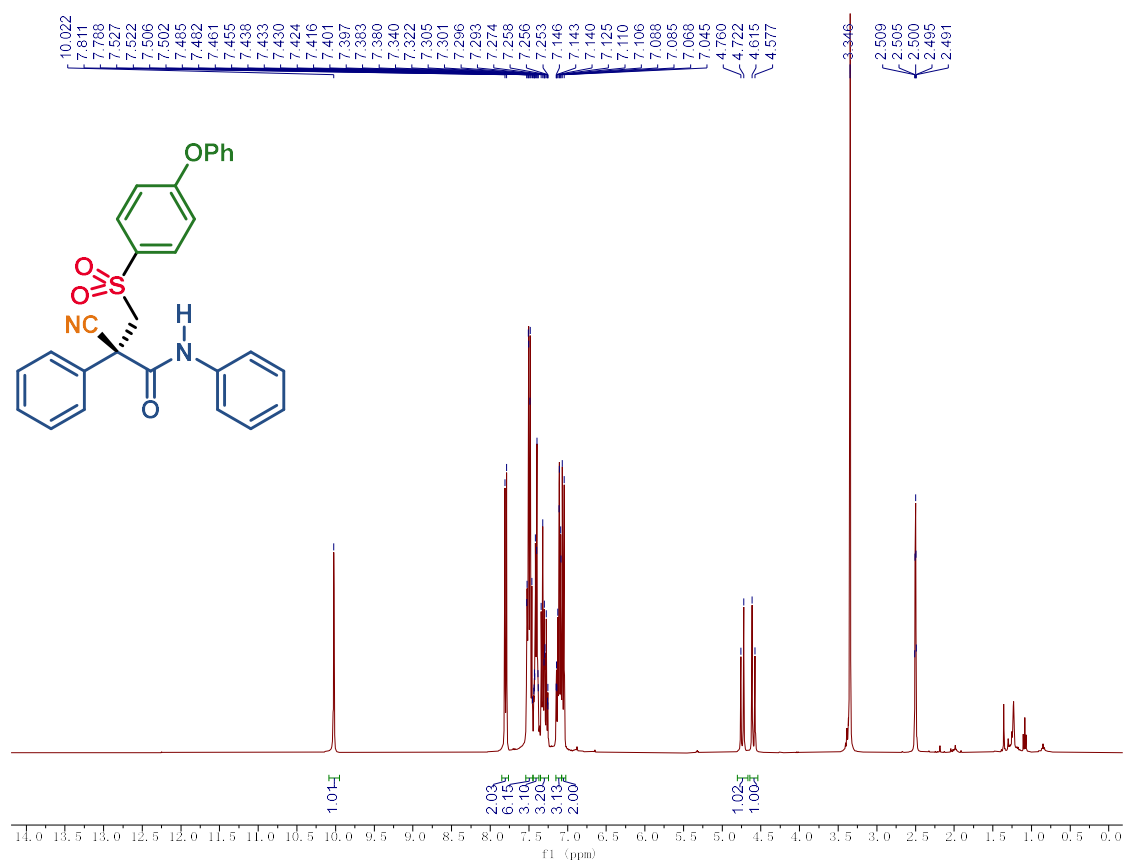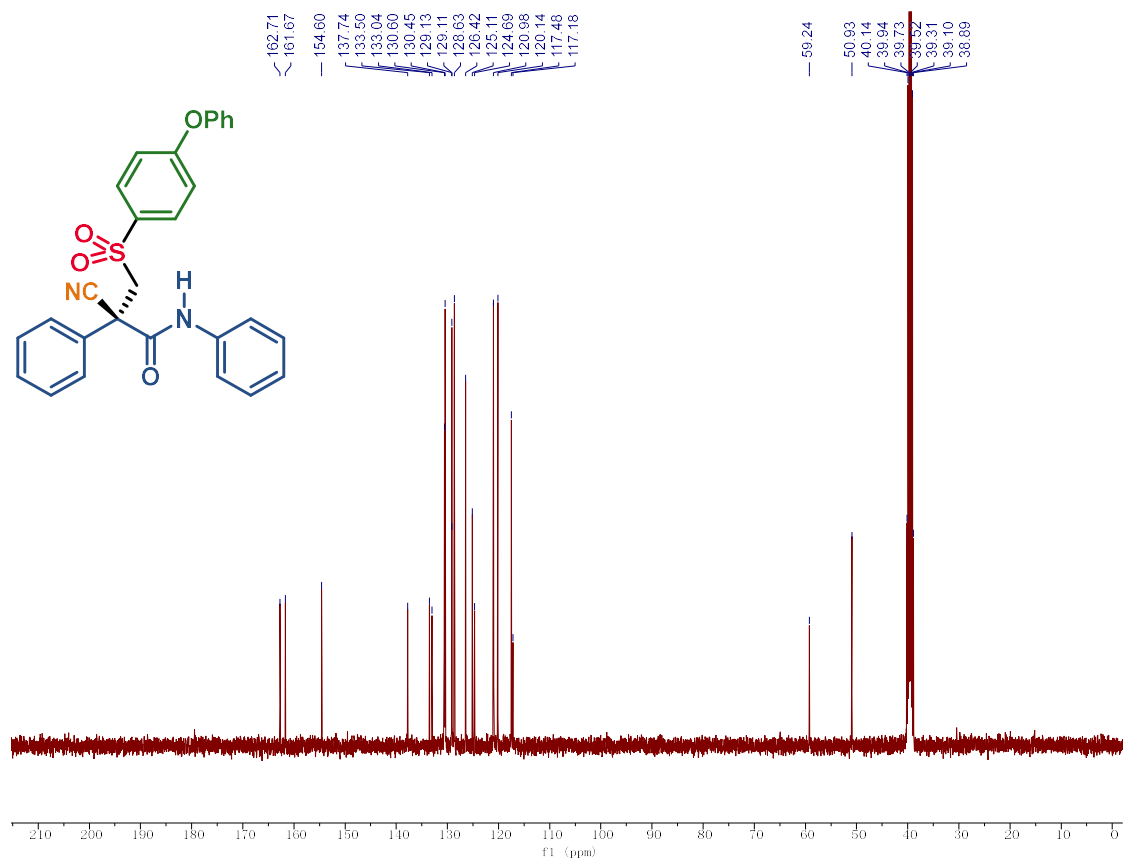

### NMR of Compound of 3d

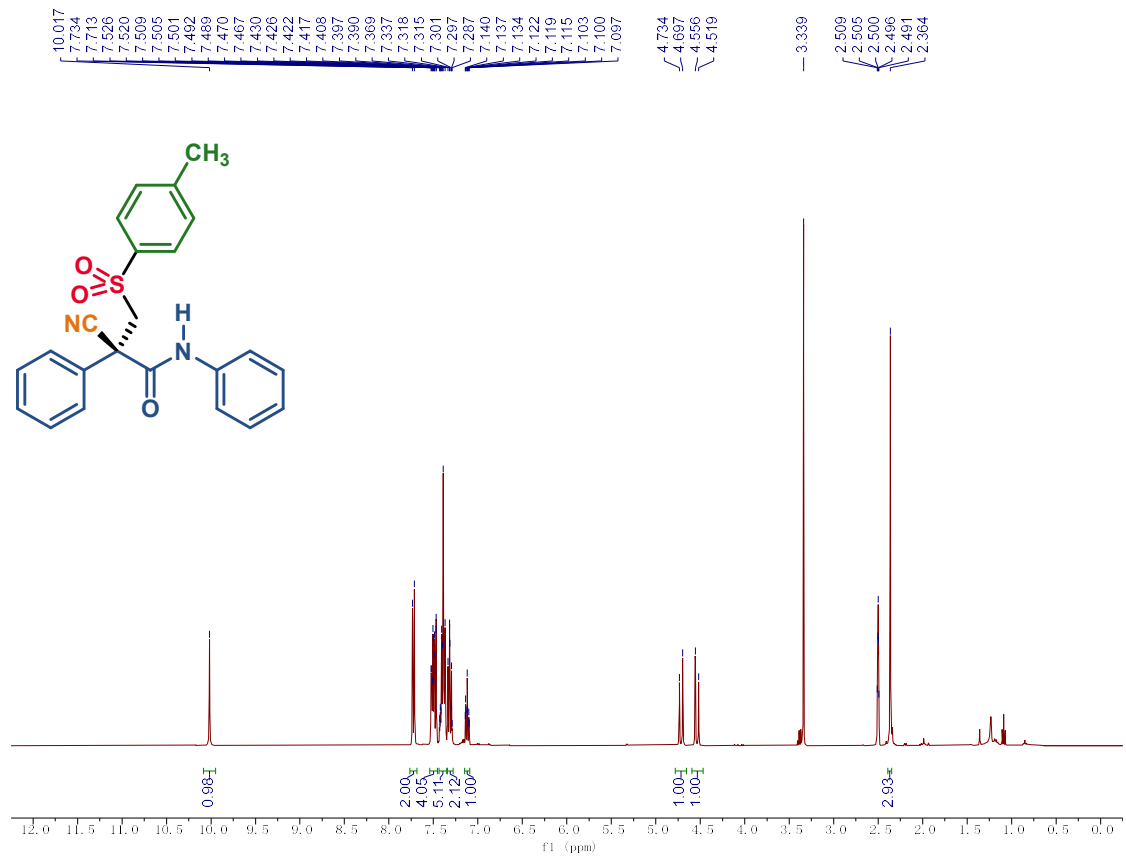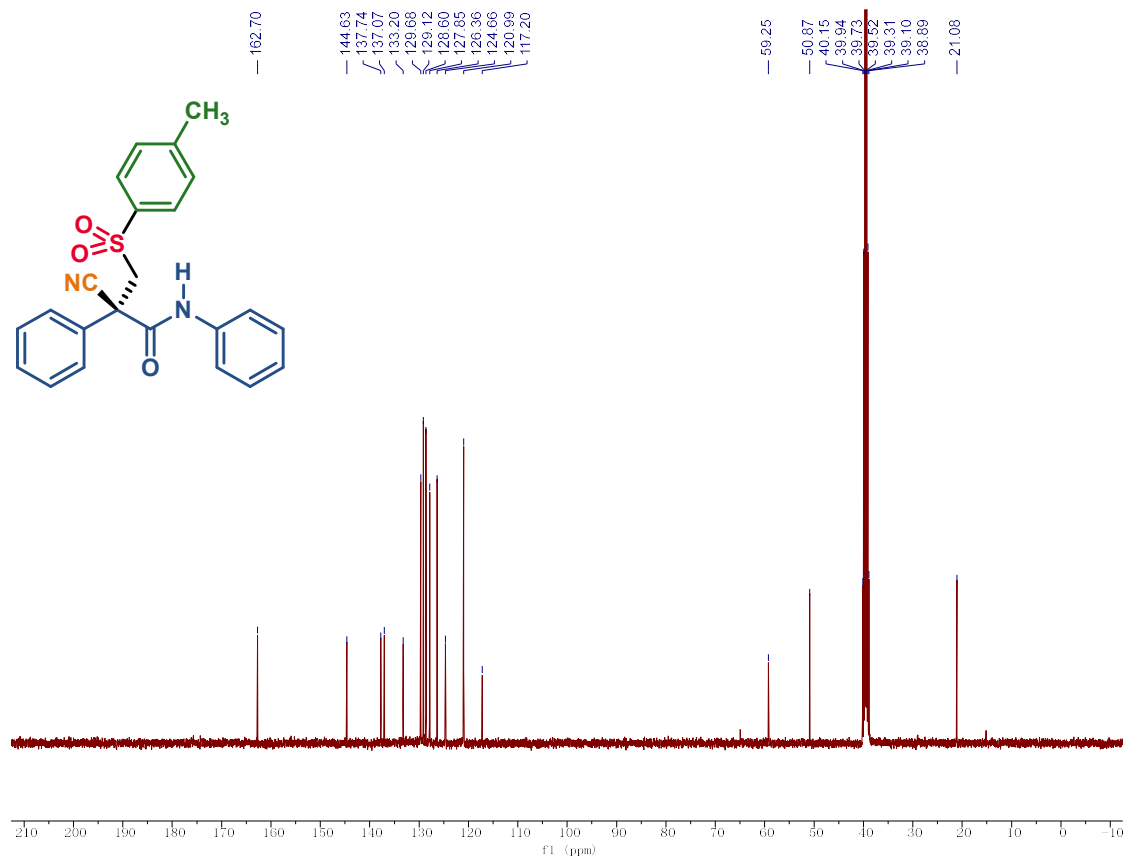

### NMR of Compound of 3e

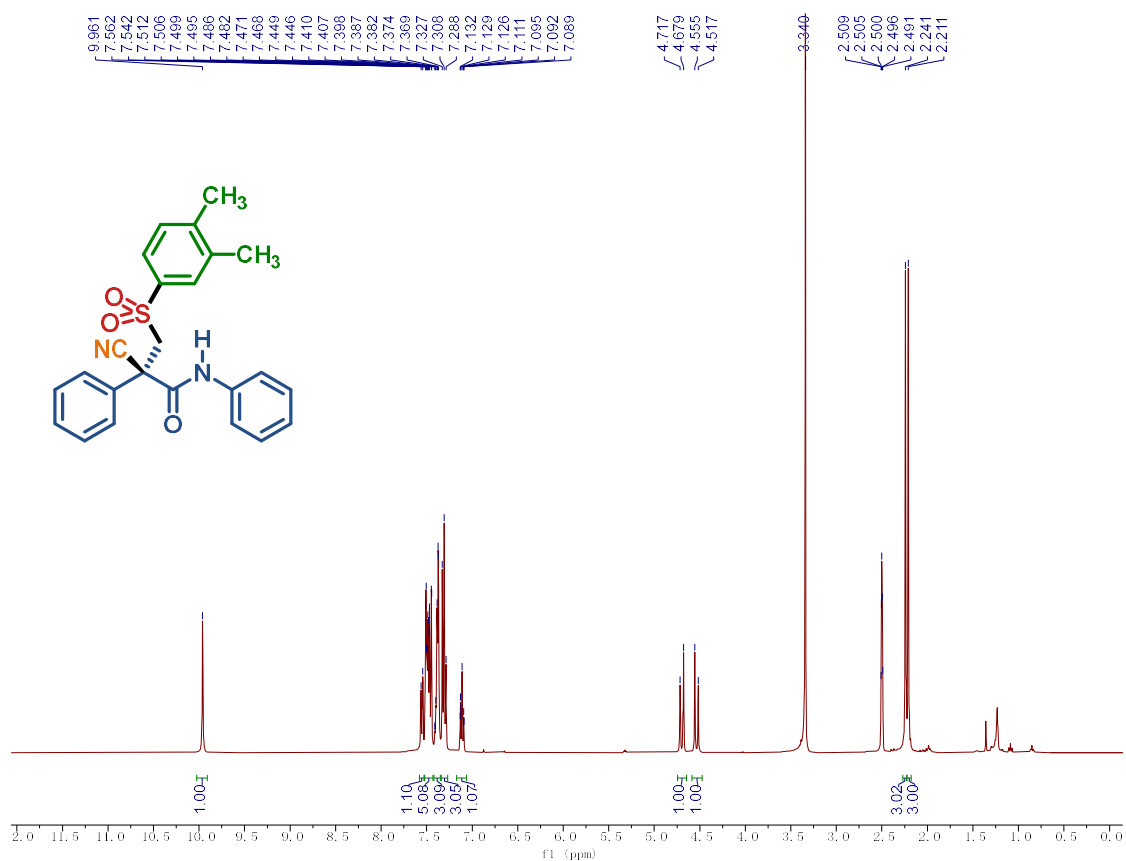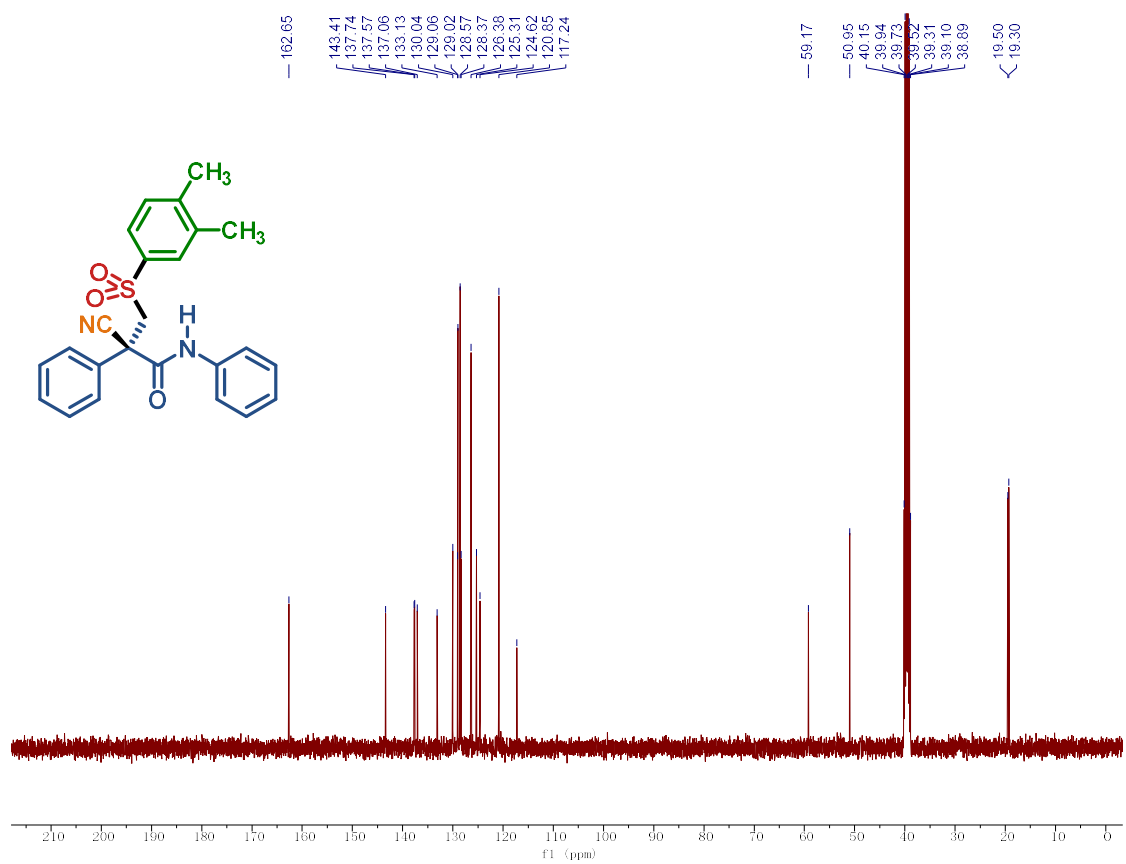

### NMR of Compound of 3f

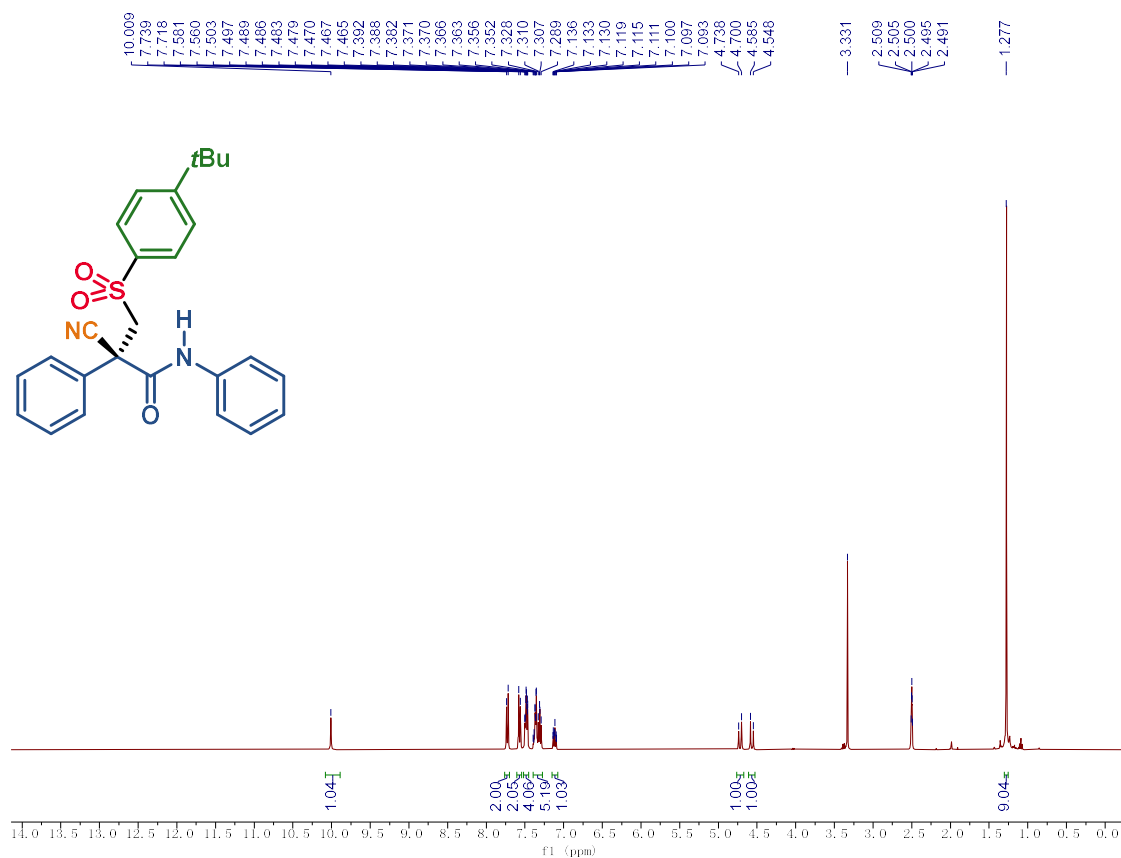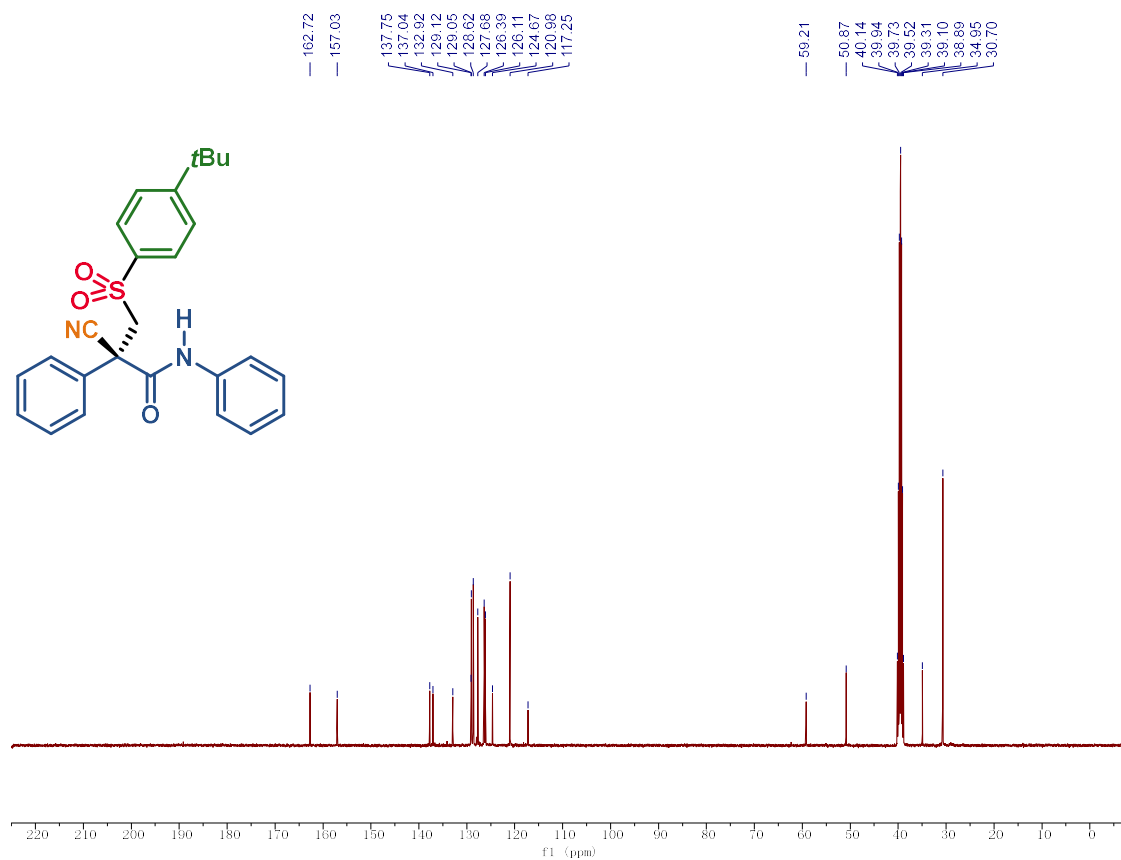

### NMR of Compound of 3g

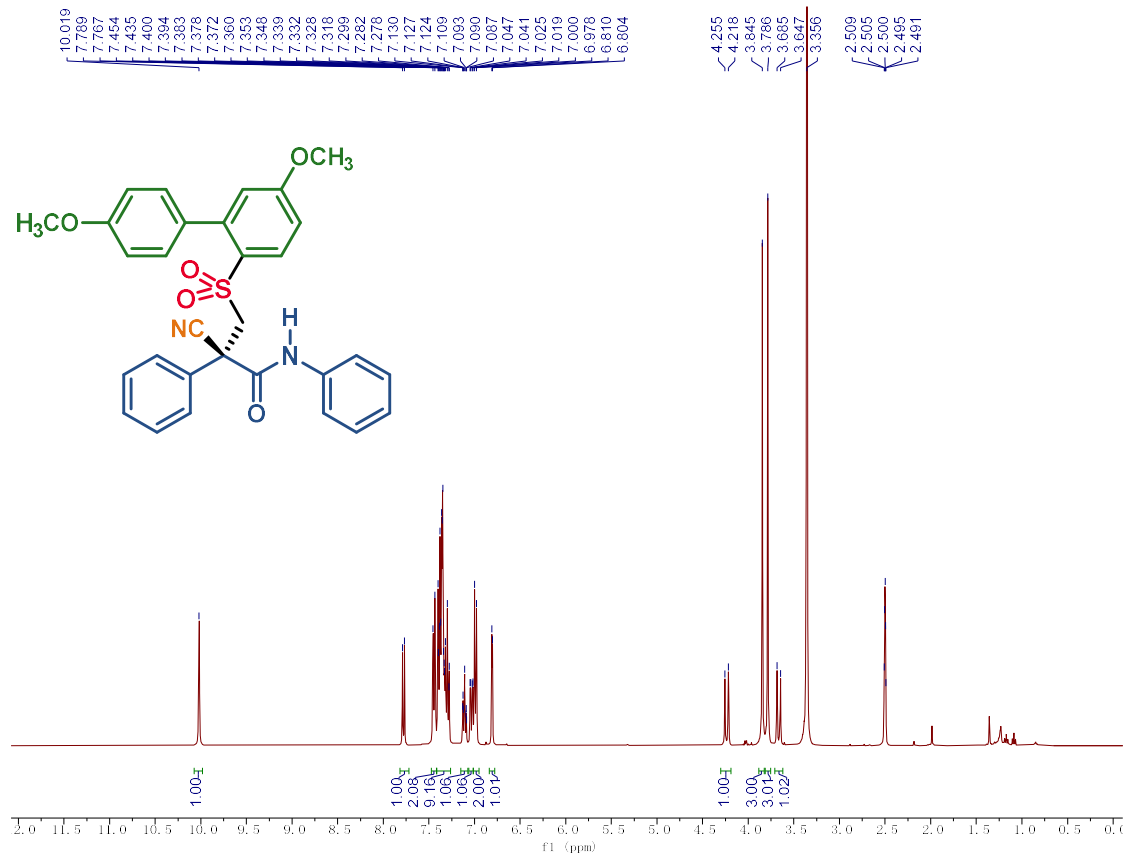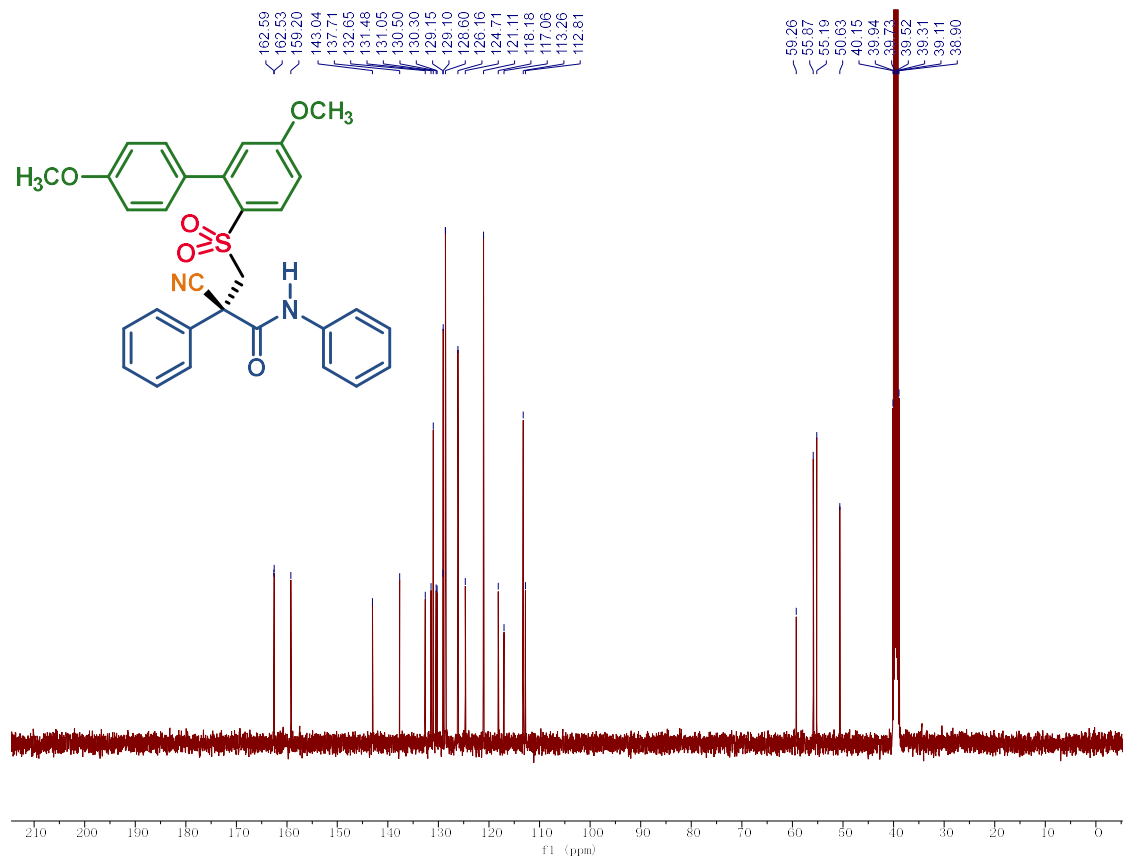

### NMR of Compound of 3h

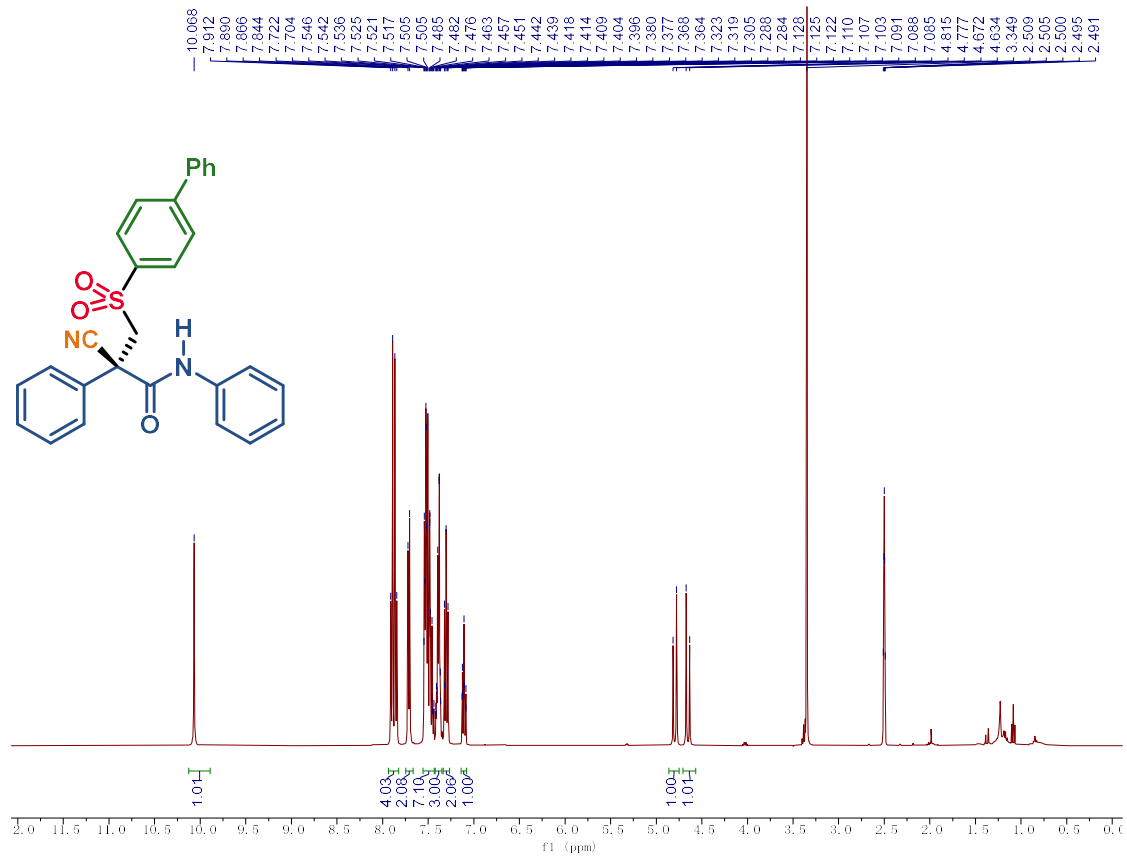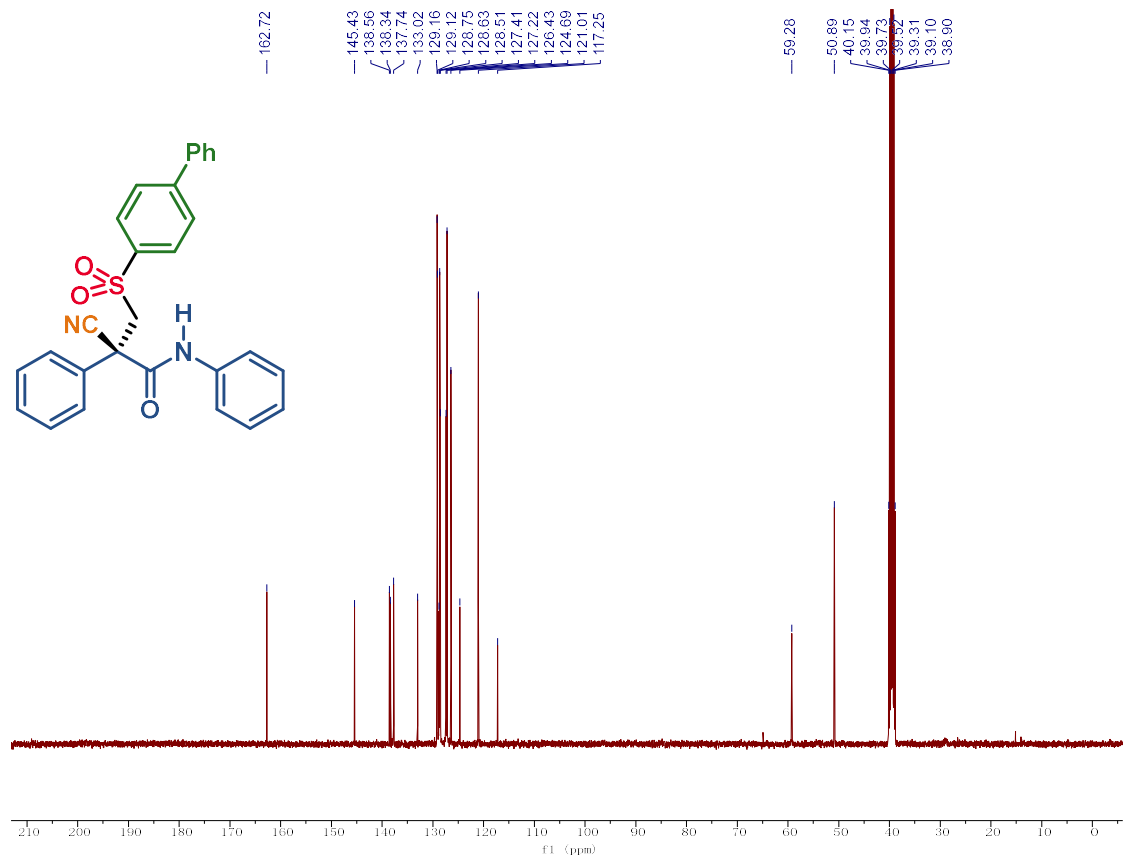

# NMR of Compound of 3i

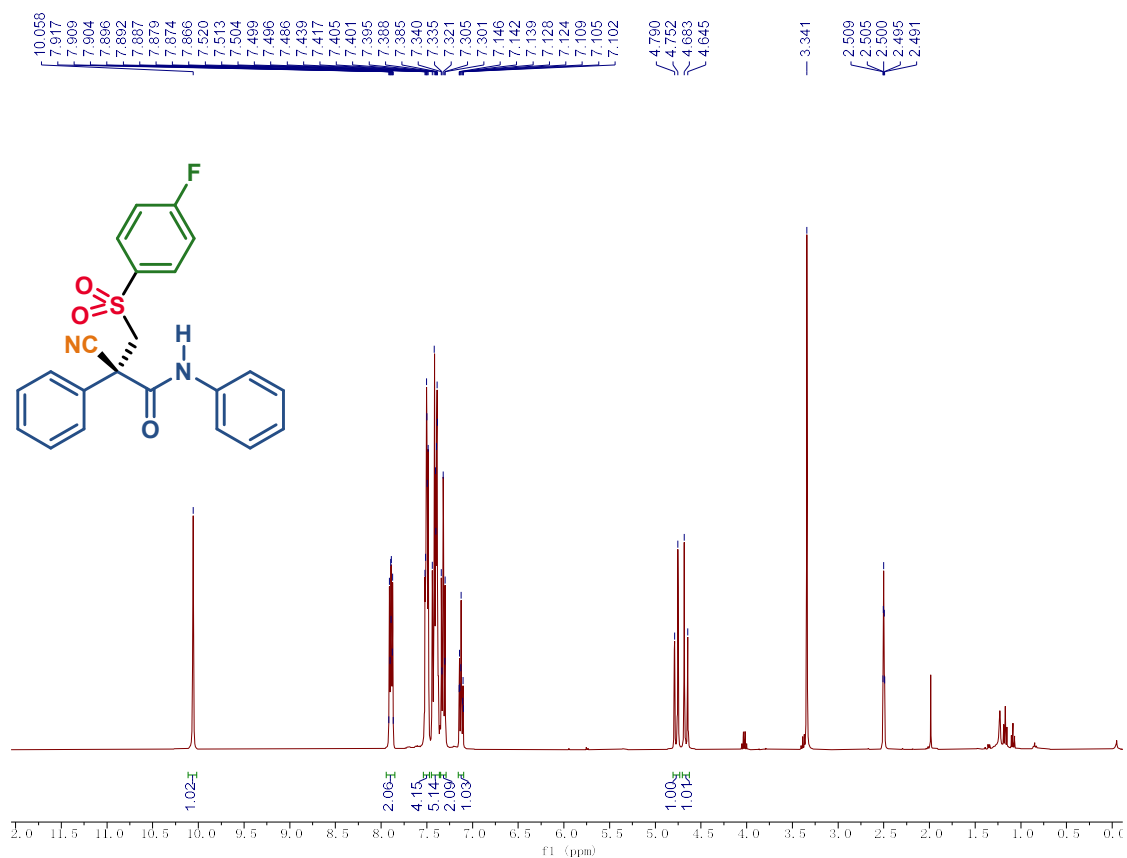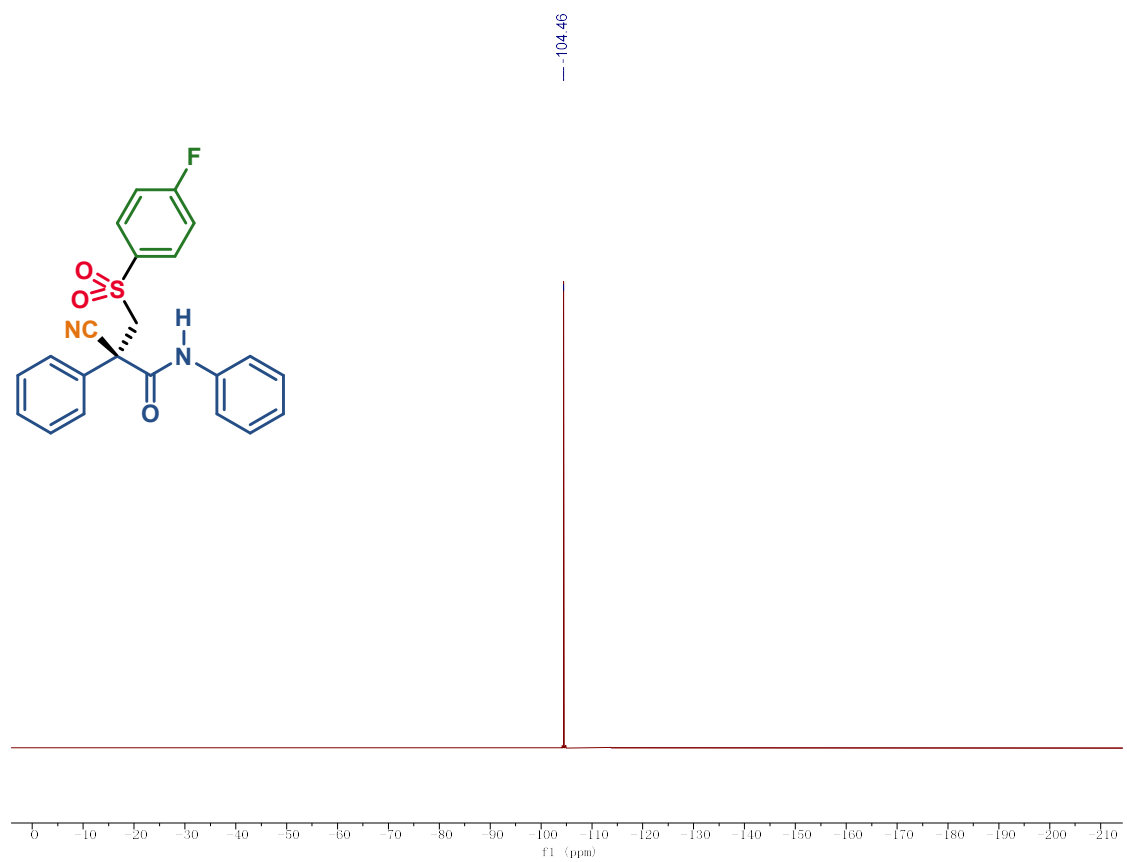



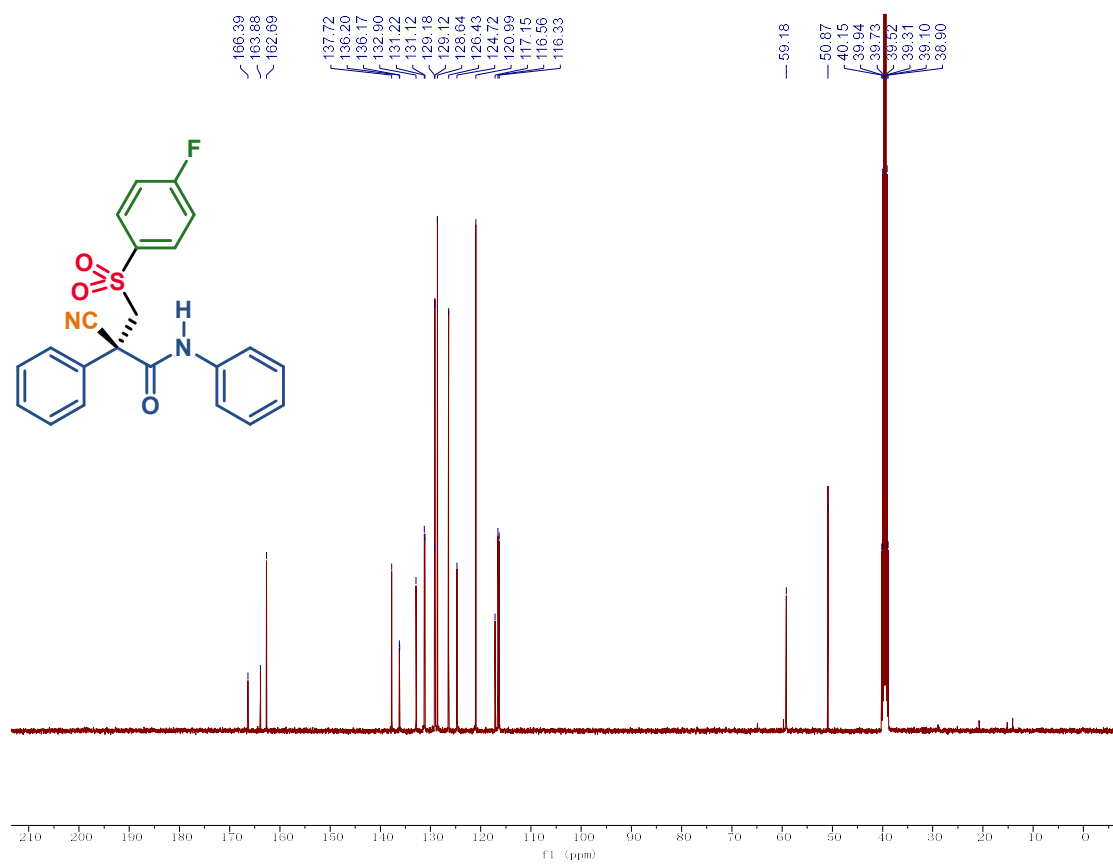

### NMR of Compound of 3j

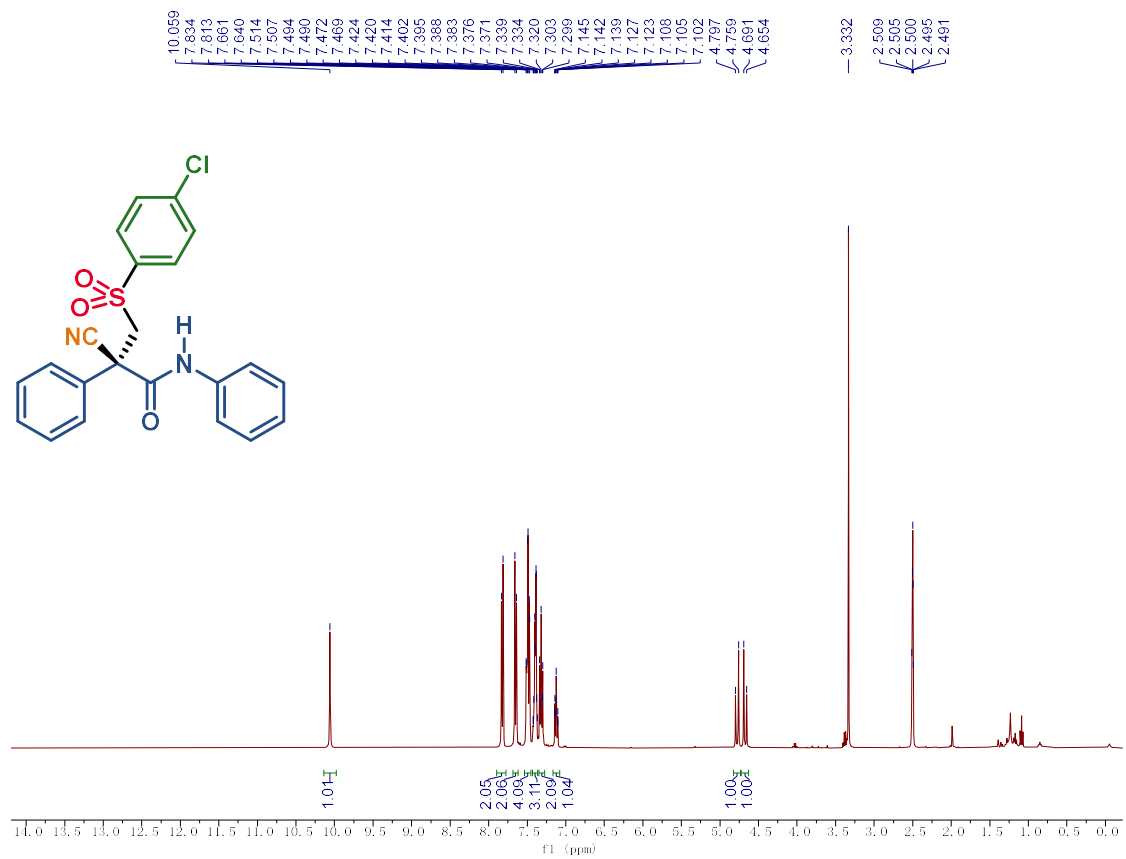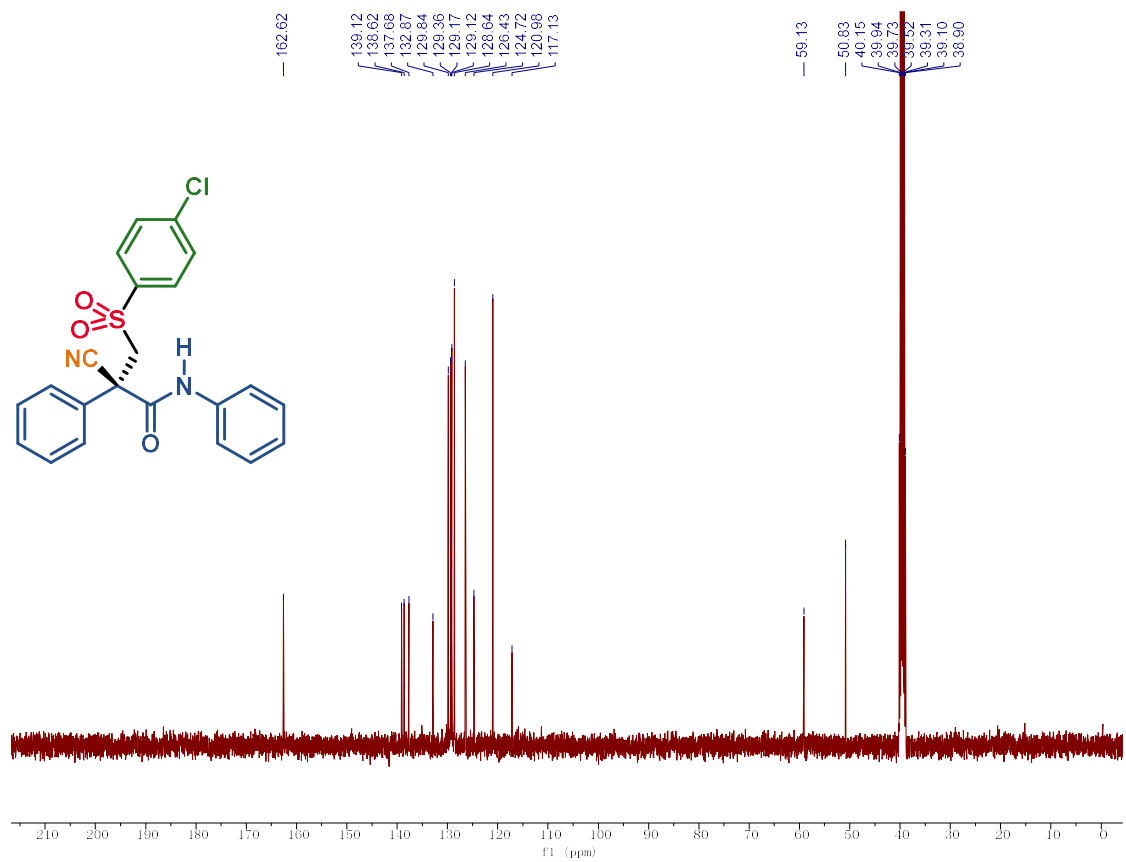

### NMR of Compound of 3k

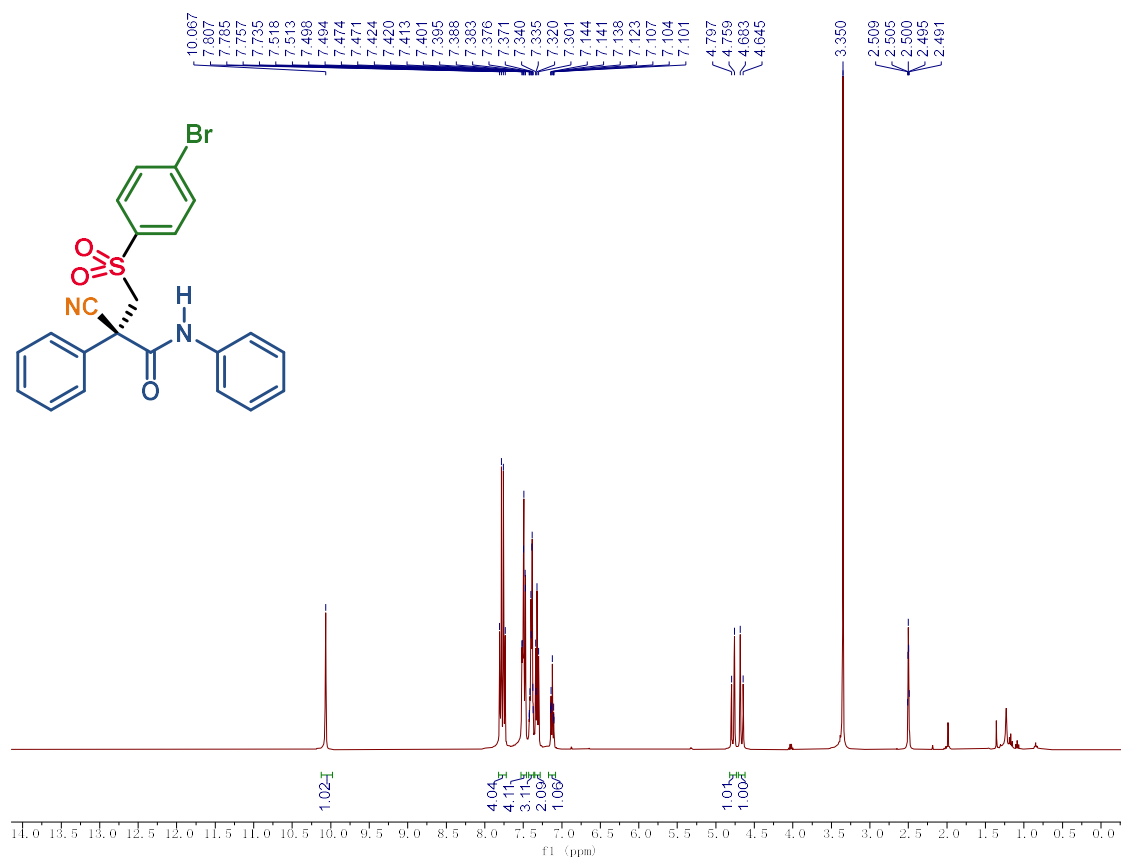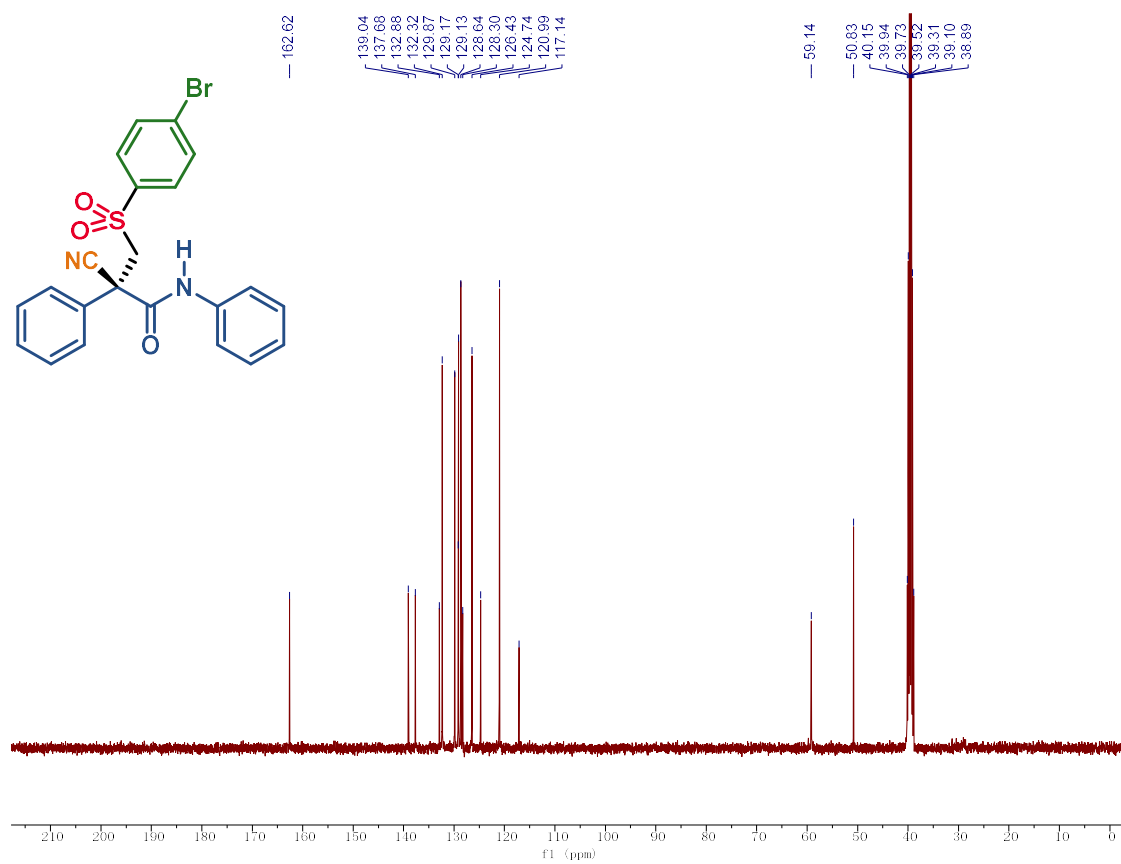

### NMR of Compound of 3l

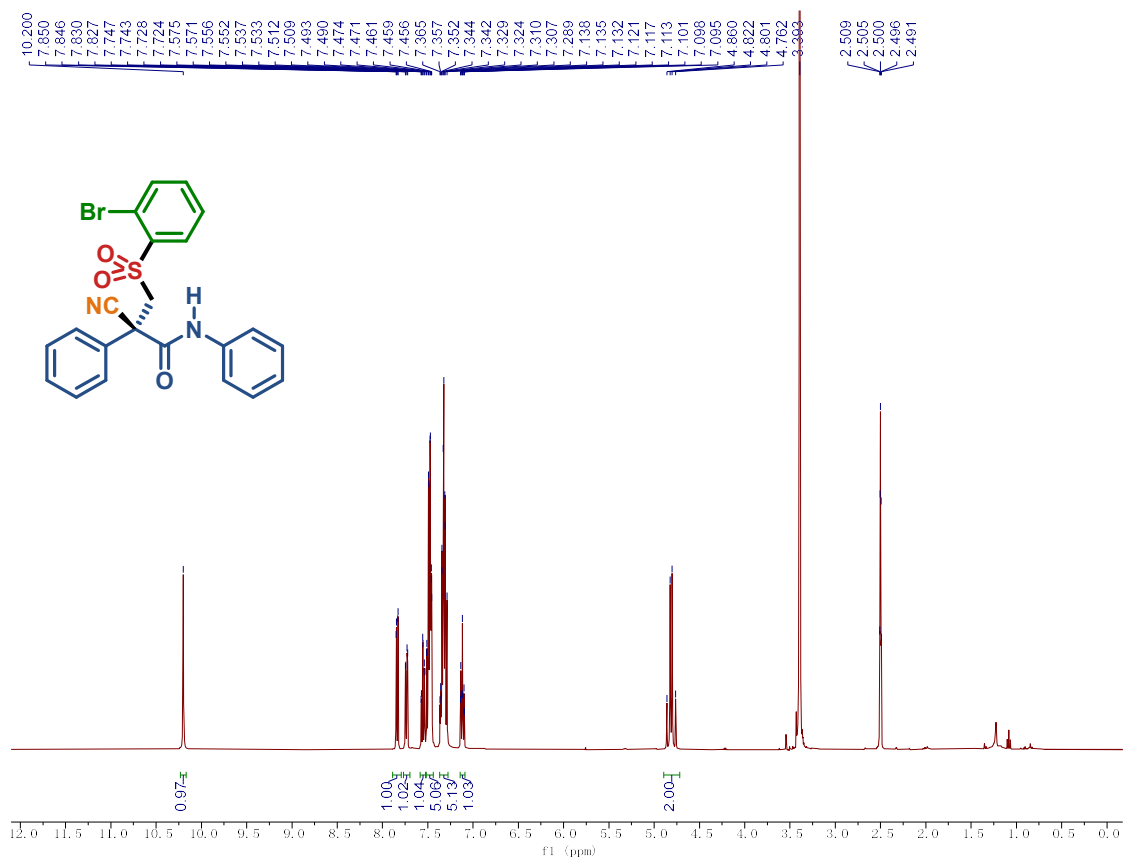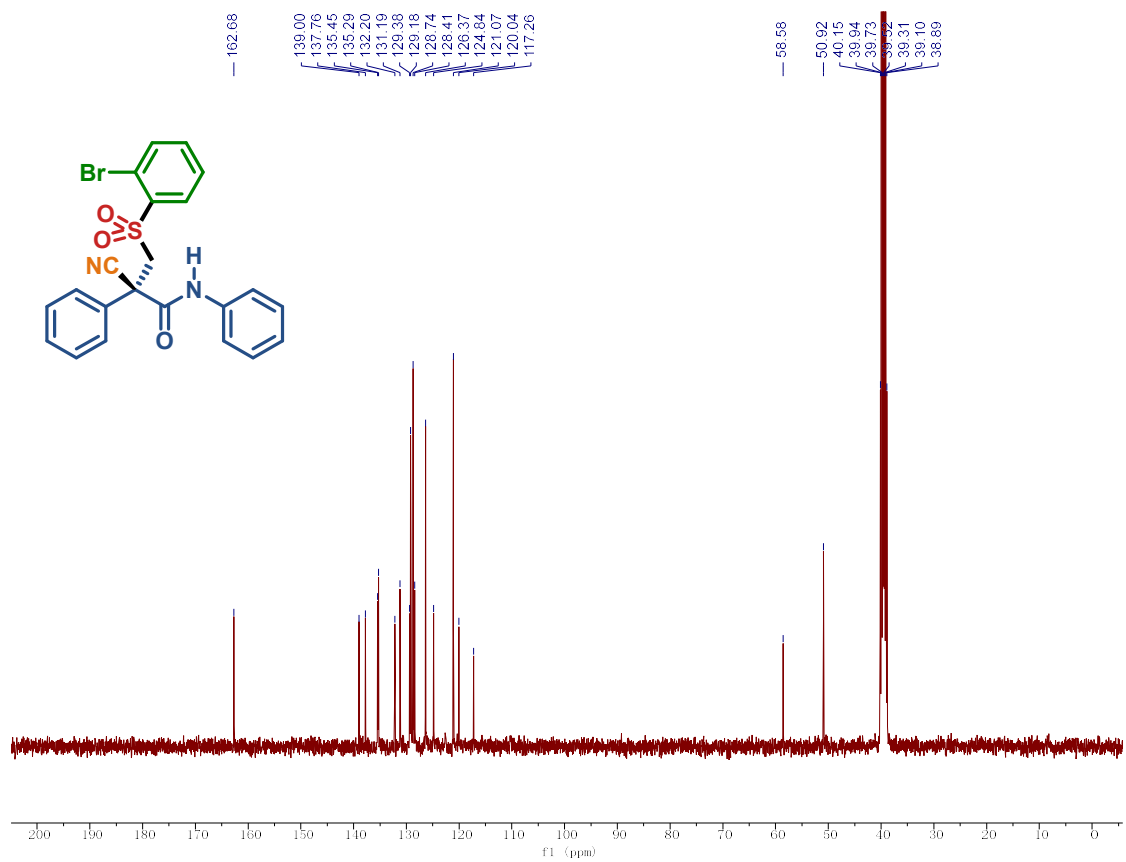

### NMR of Compound of 3m

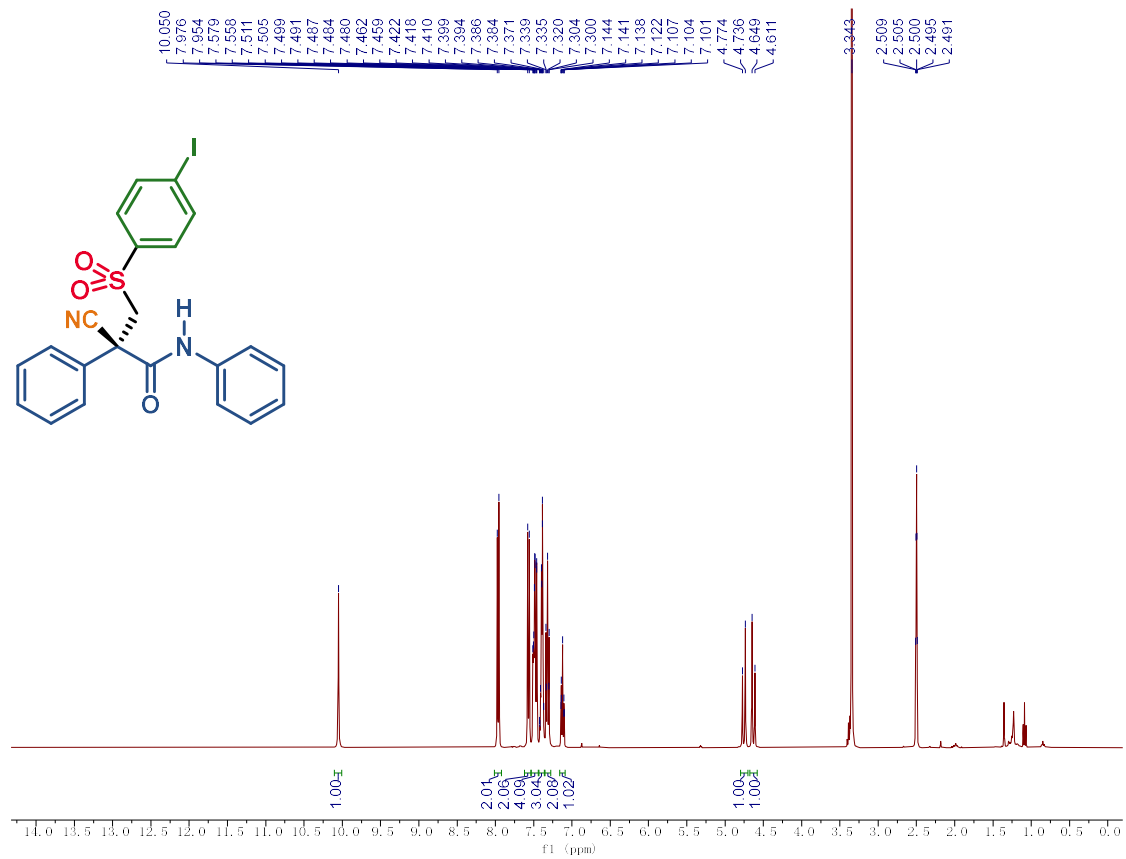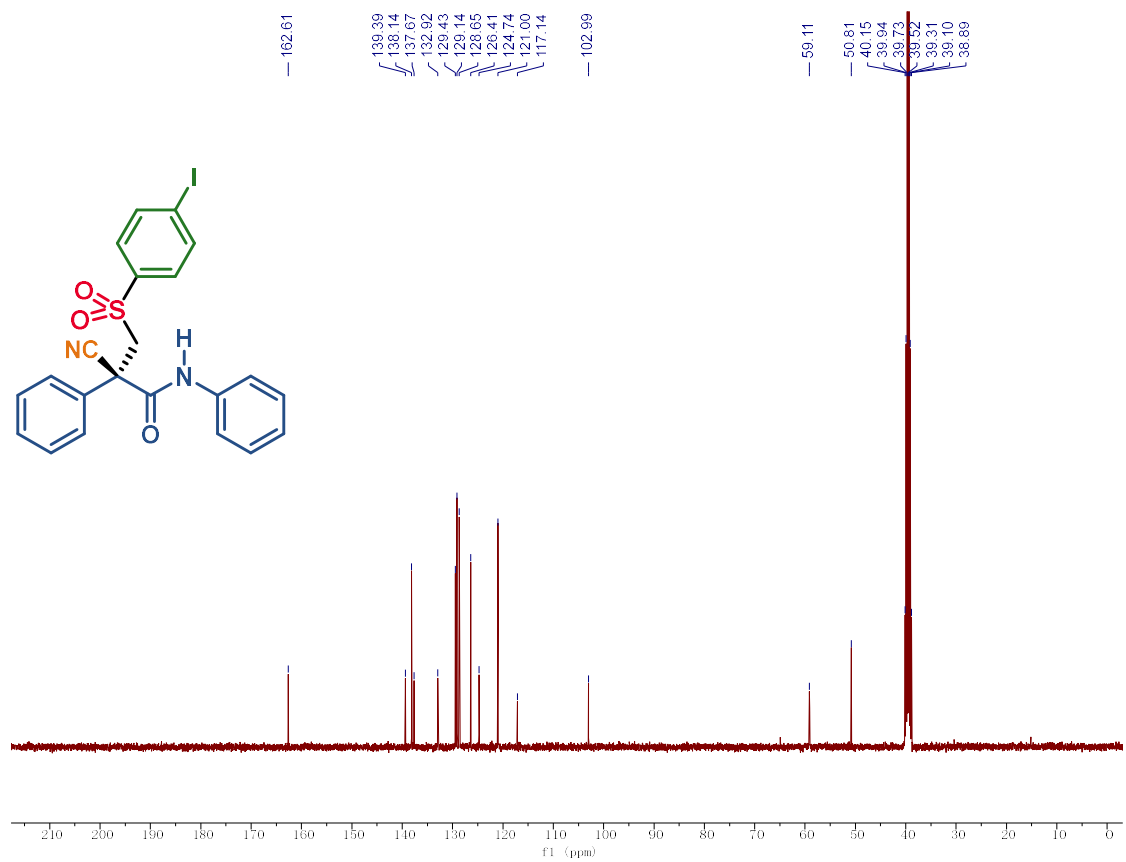

### NMR of Compound of 3n

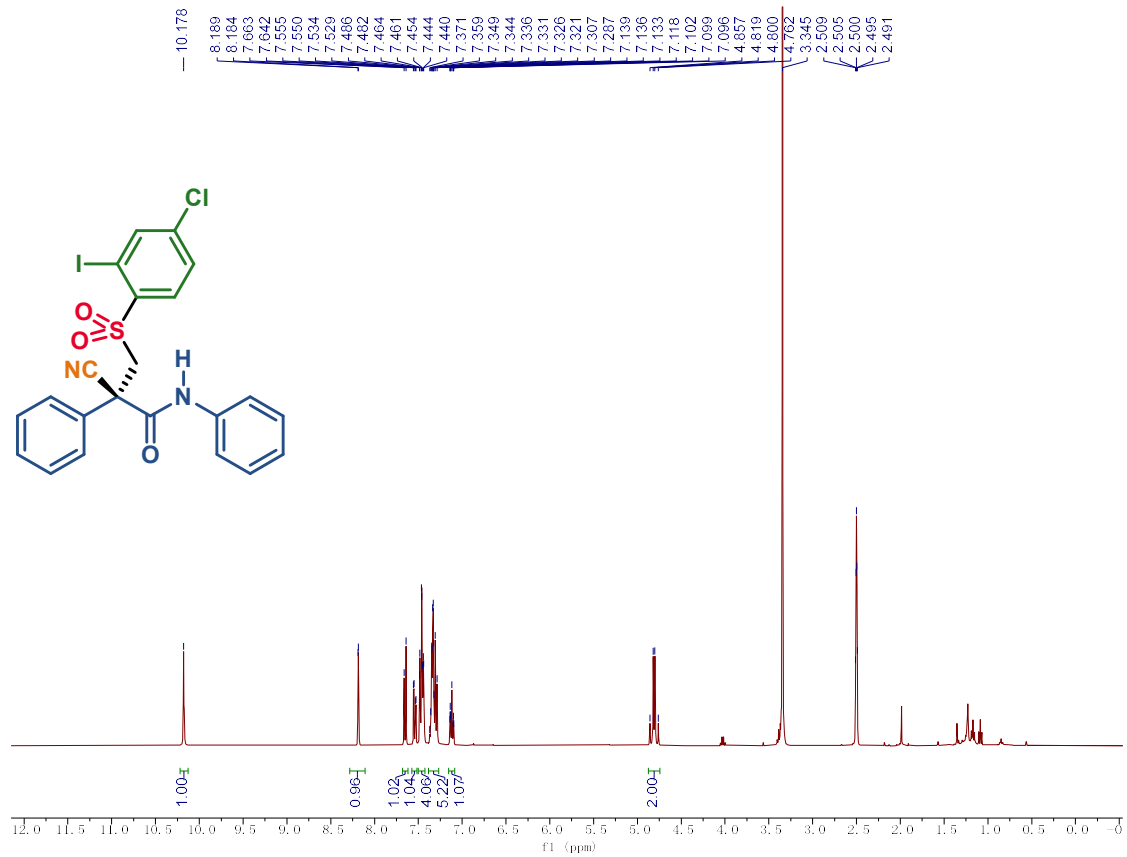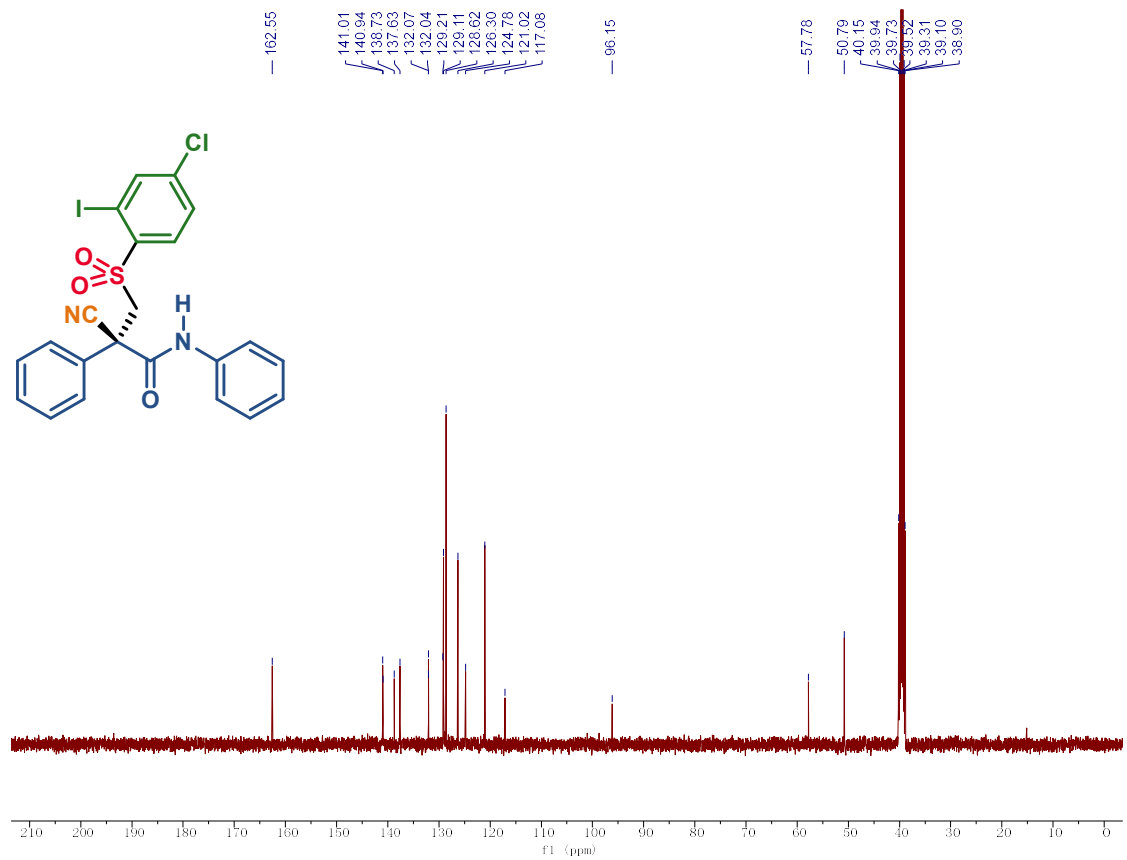

### NMR of Compound of 3o

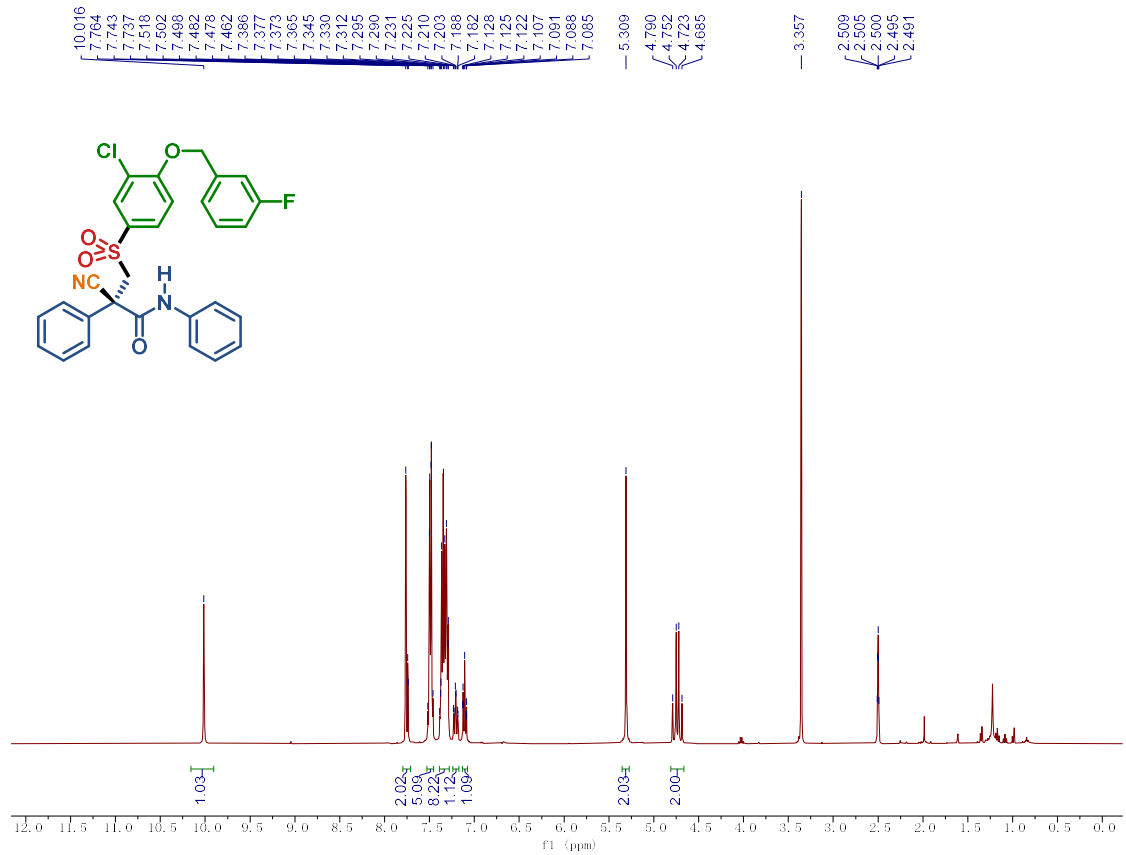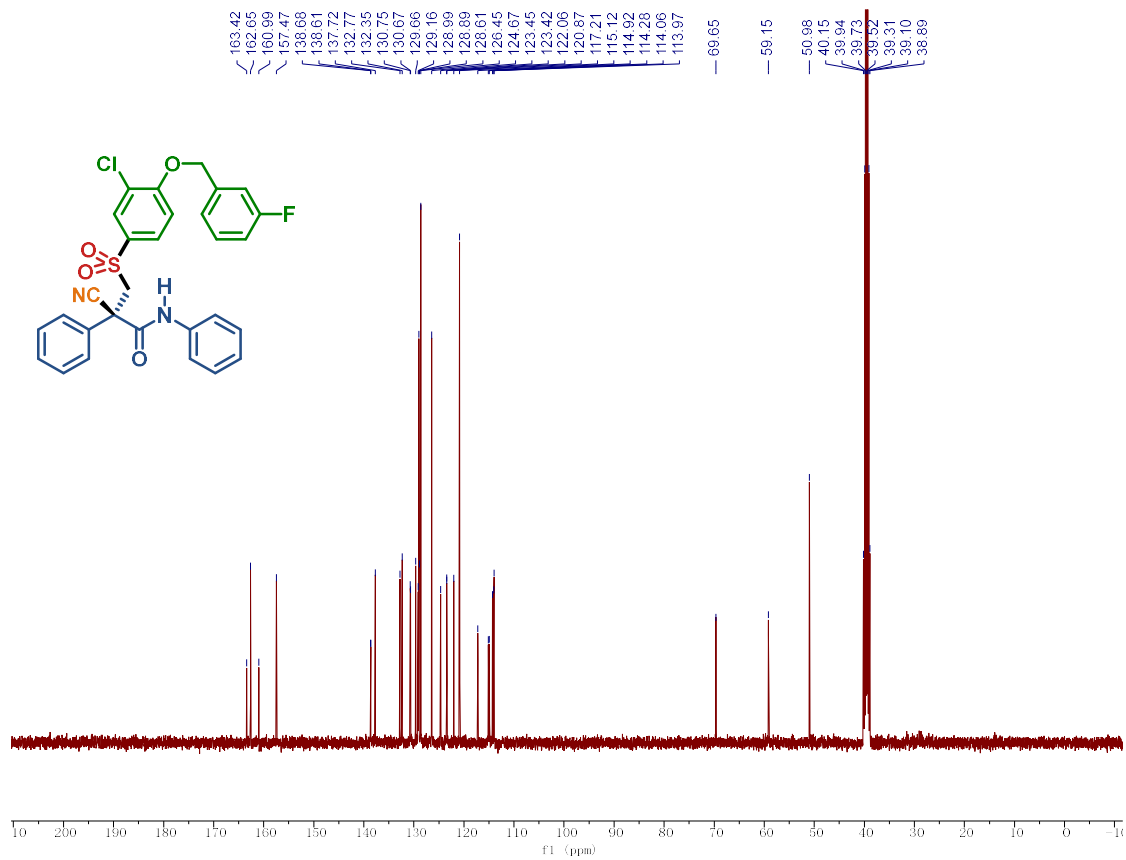

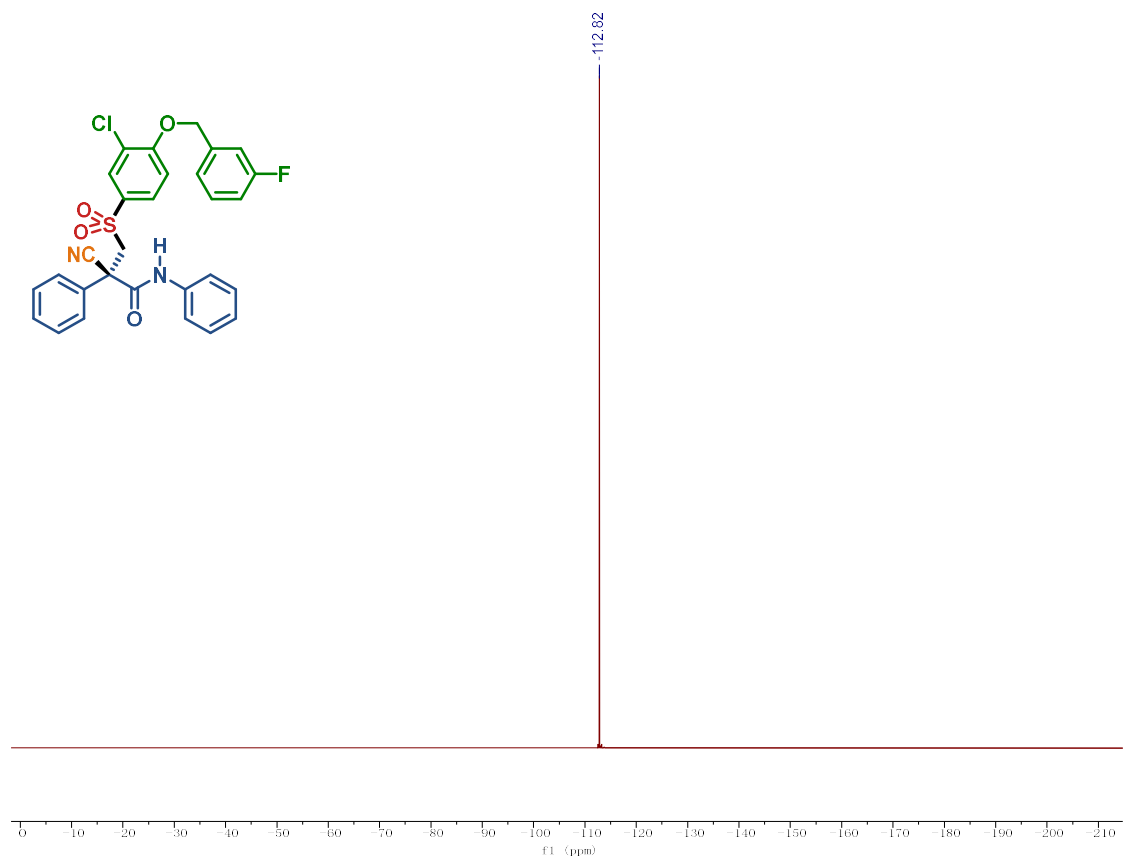



# NMR of Compound of 3p

Desktop/LZ-240124/LZ-LLP2-252-1\_proton-1-1.jdf

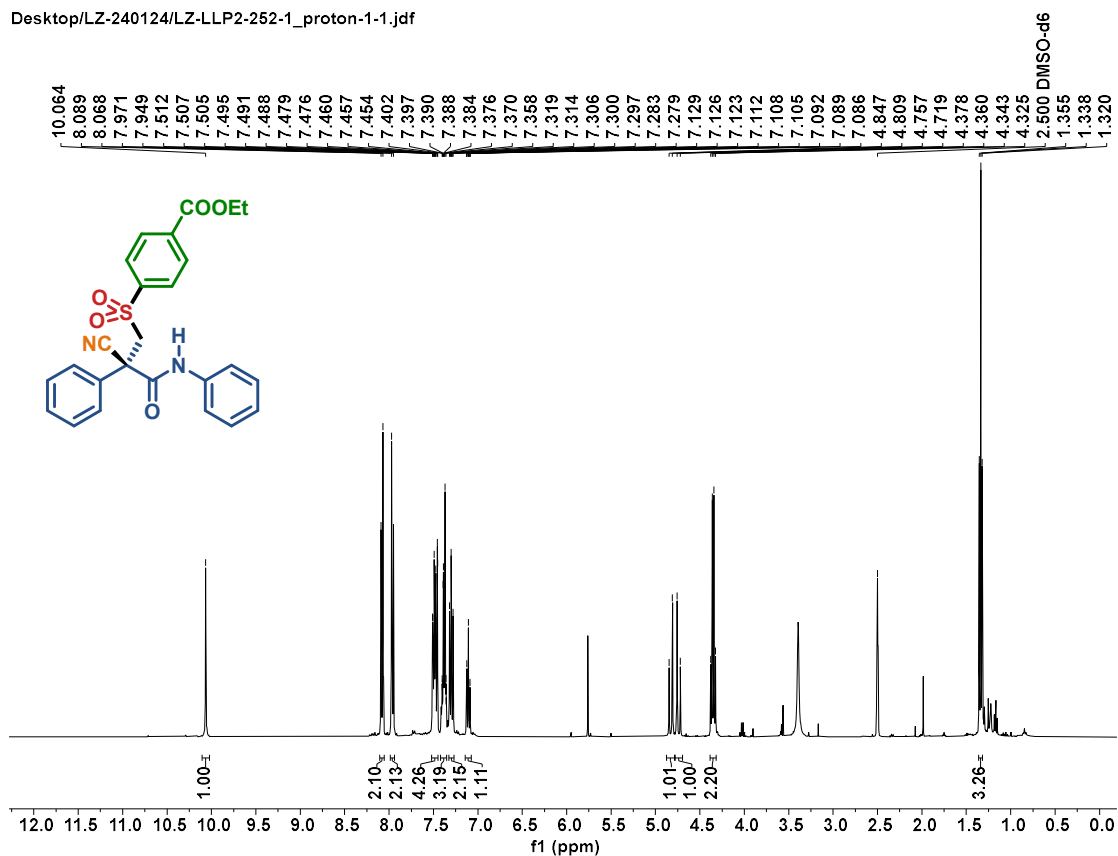

Desktop/LZ-240124/LZ-LLP2-252-1\_carbon-1-1.jdf

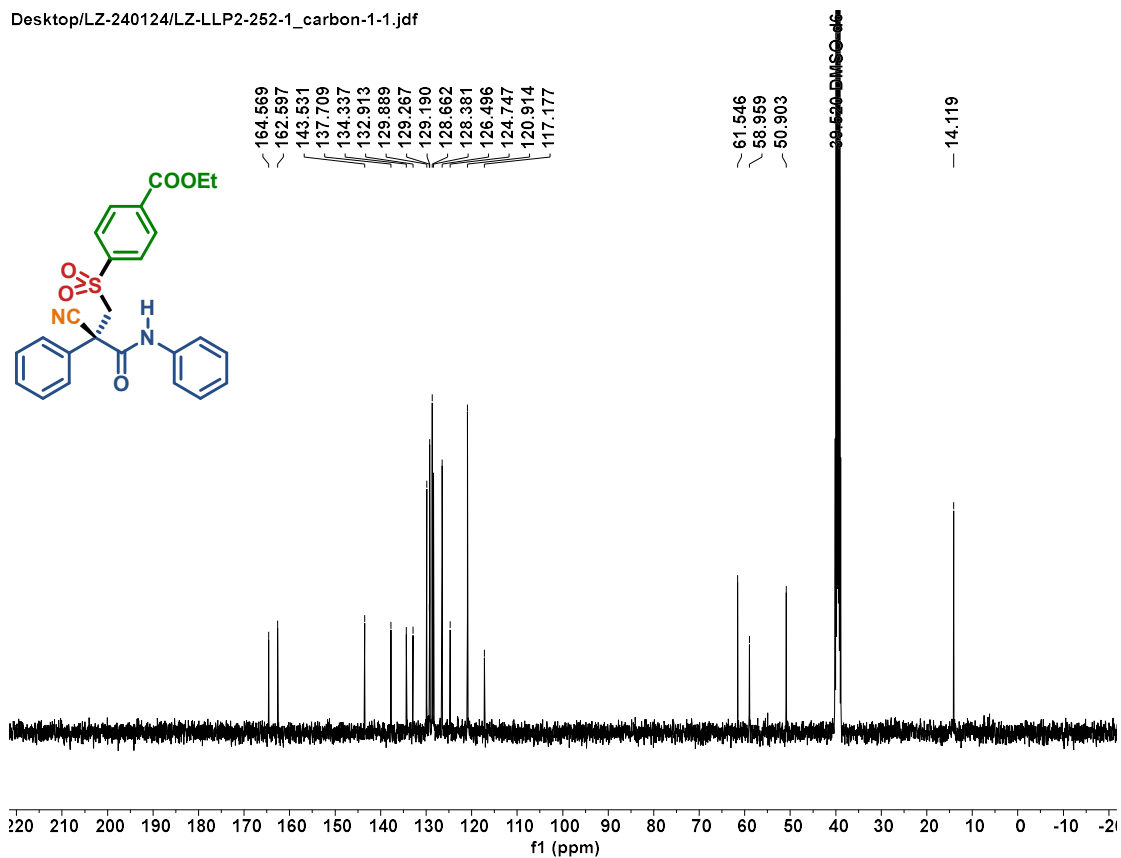

# NMR of Compound of 3q

Desktop/LZ-240124/LZ-LLP2-252-1\_proton-1-1.jdf

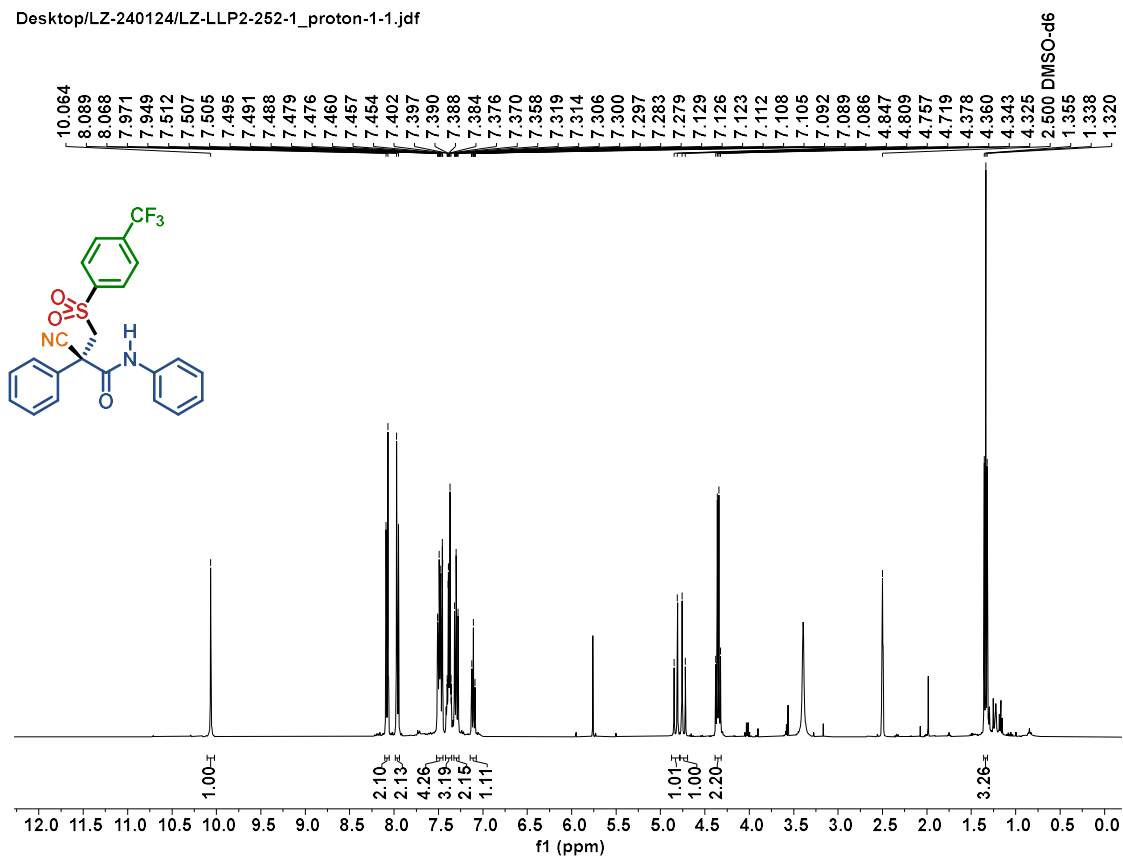

CX-2-252-2/2fid

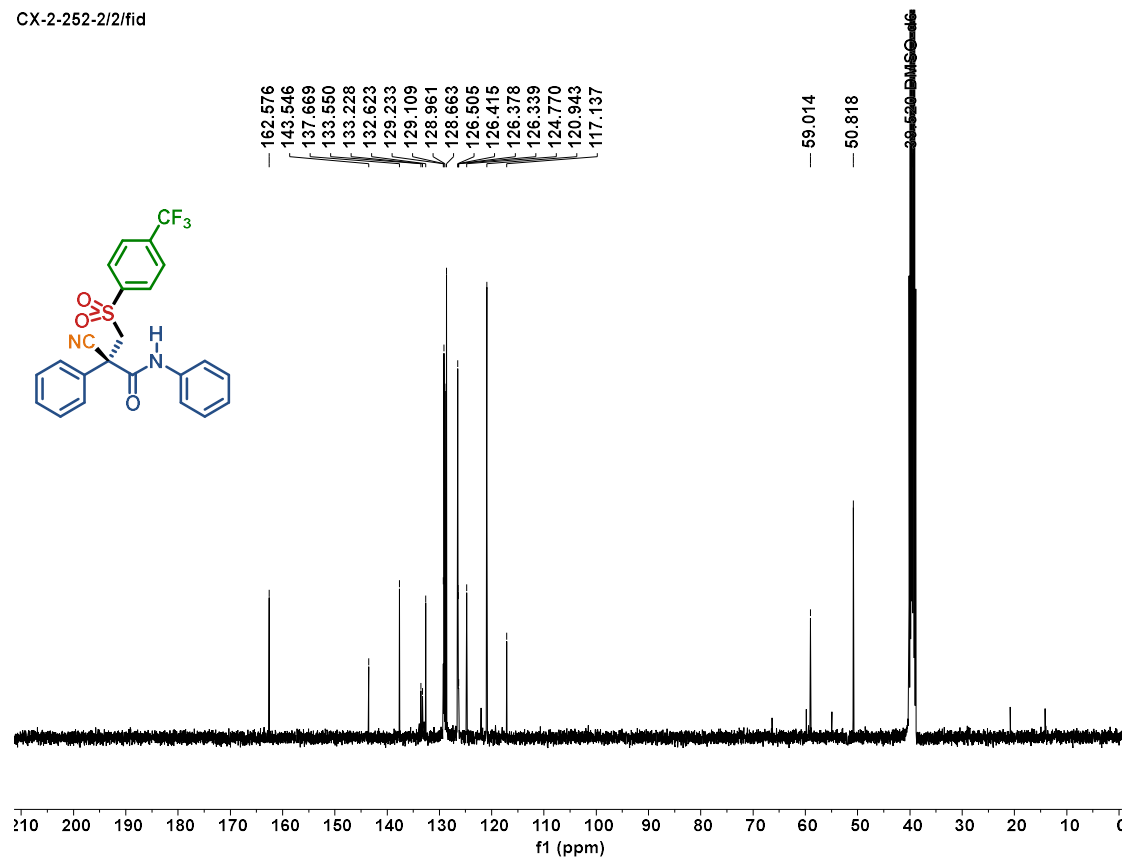

CX-2-252-2/1/fid

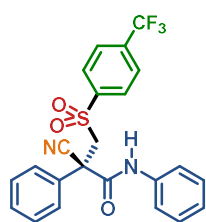

-61.812

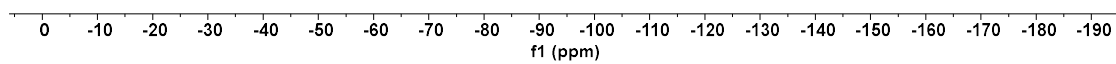

### NMR of Compound of 3r

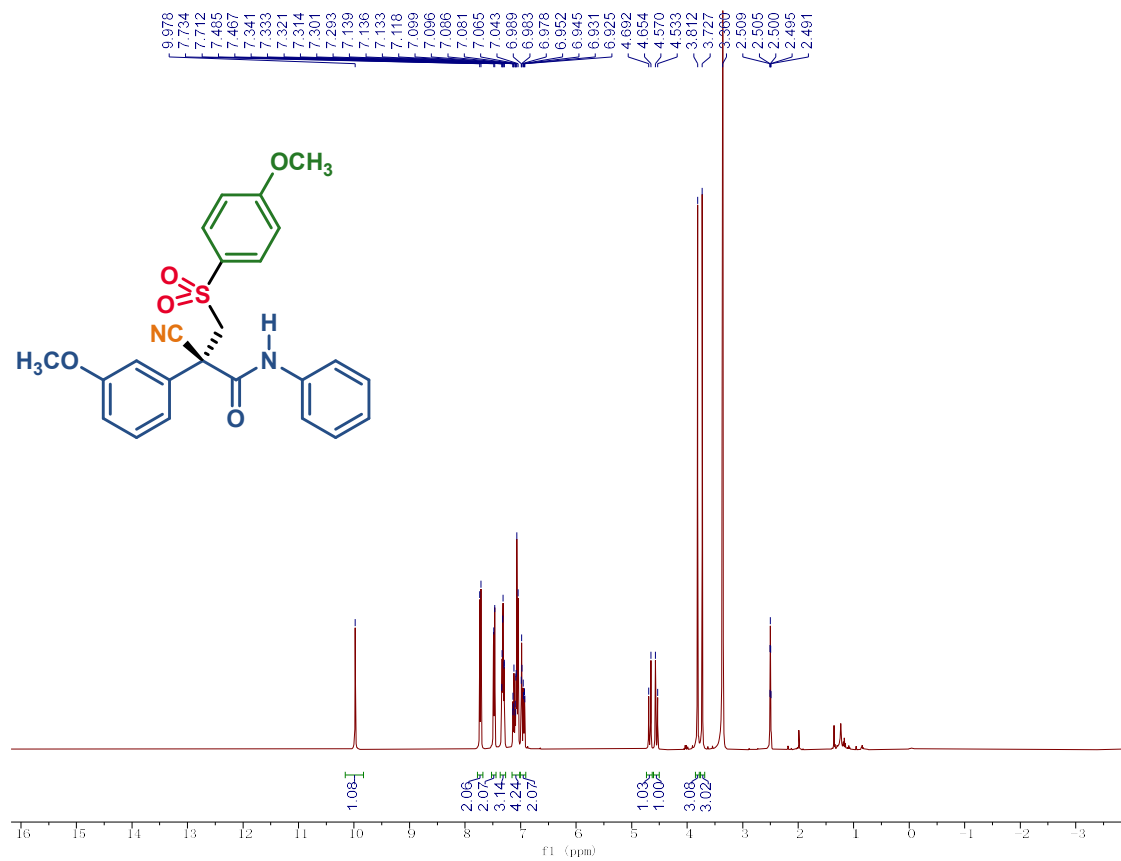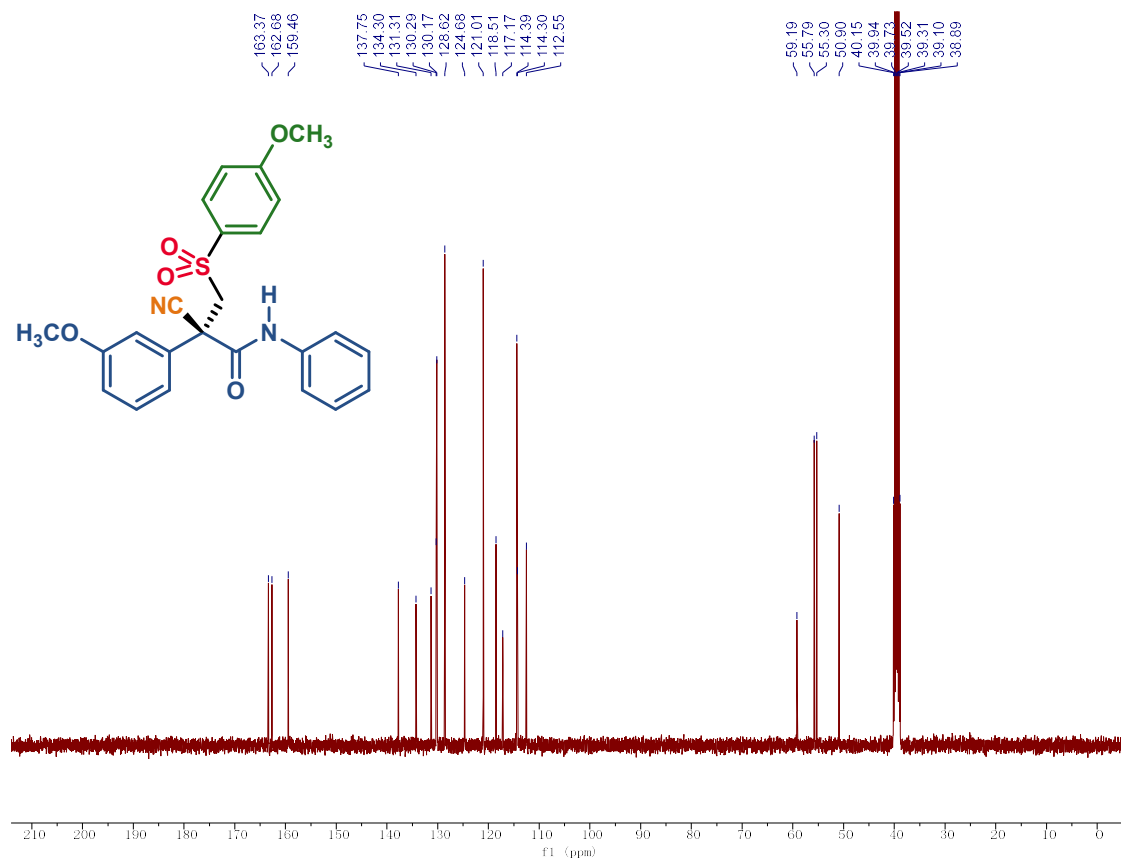

### NMR of Compound of 3s

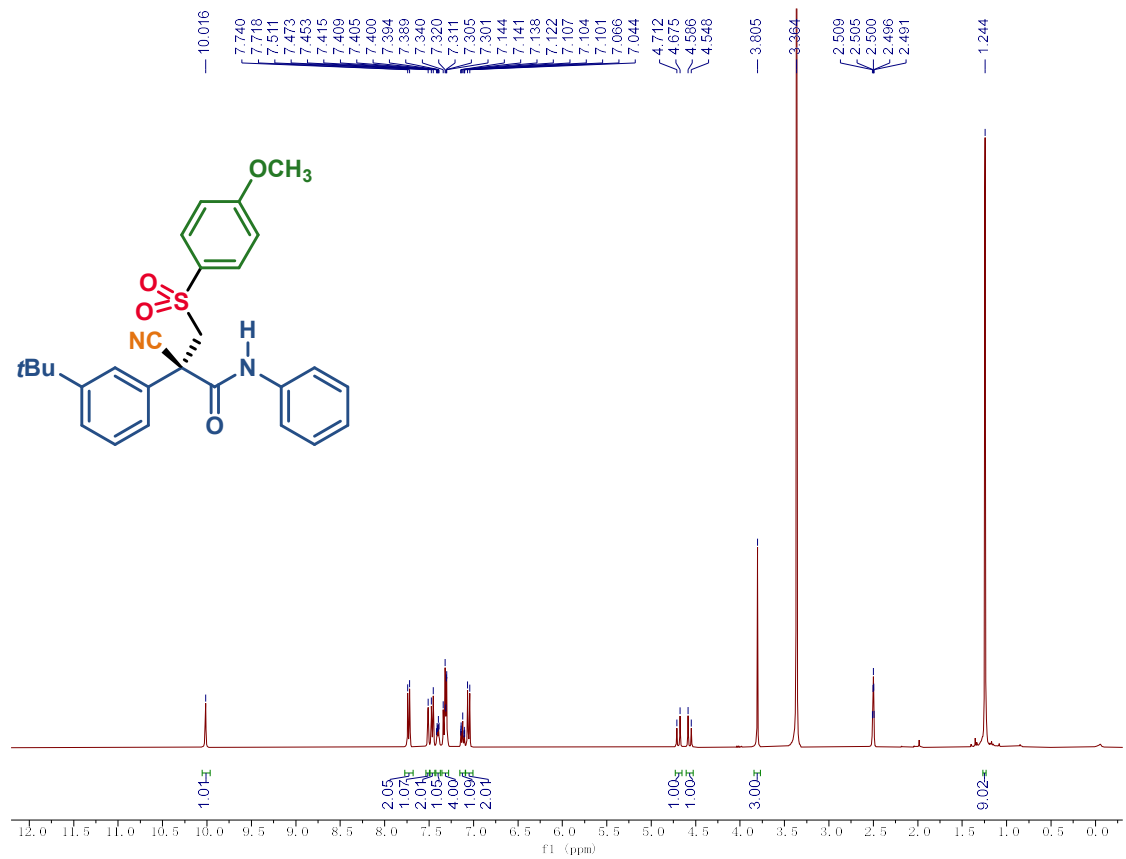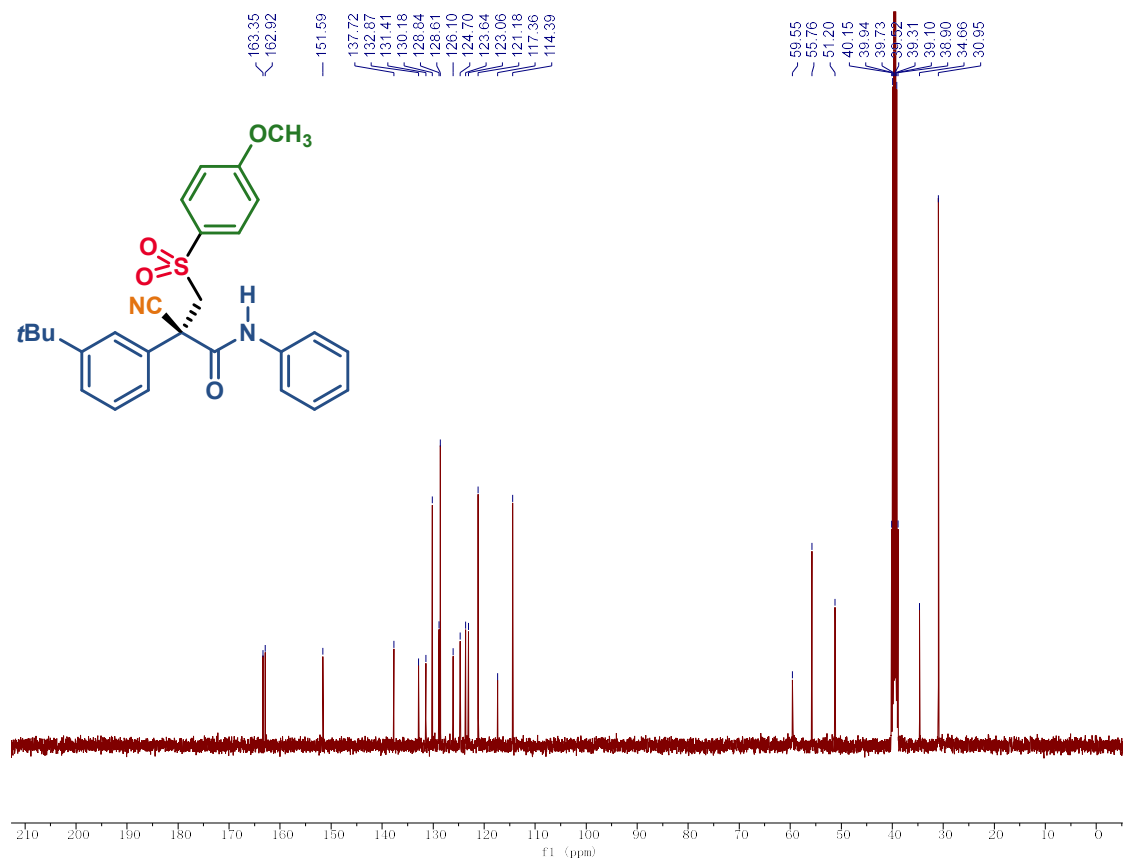

### NMR of Compound of 3t

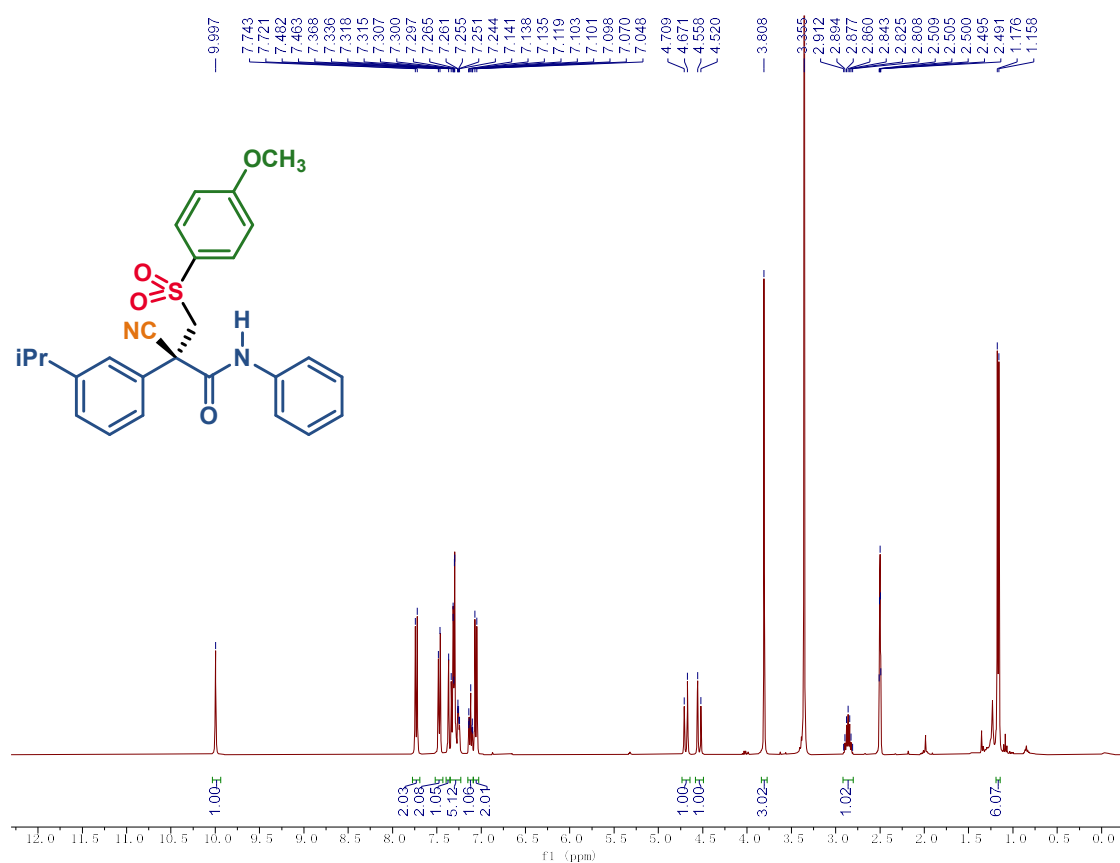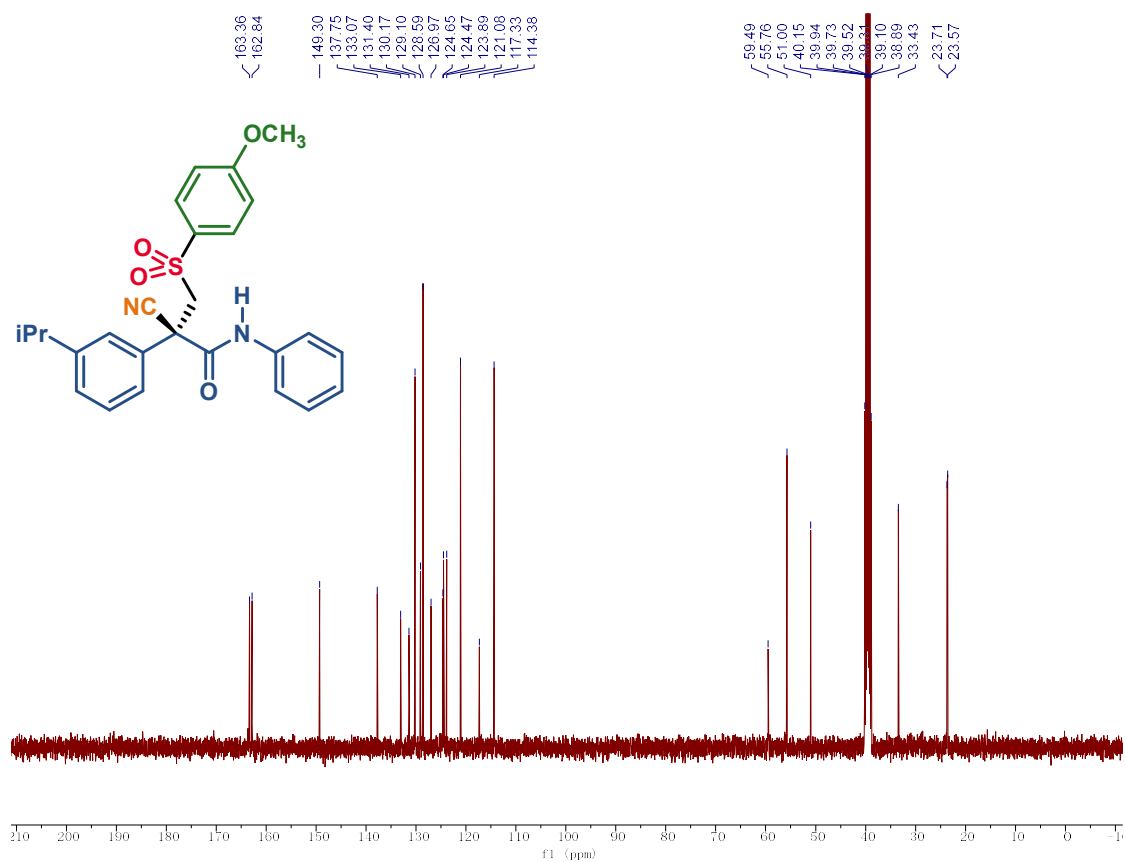

### NMR of Compound of 3u

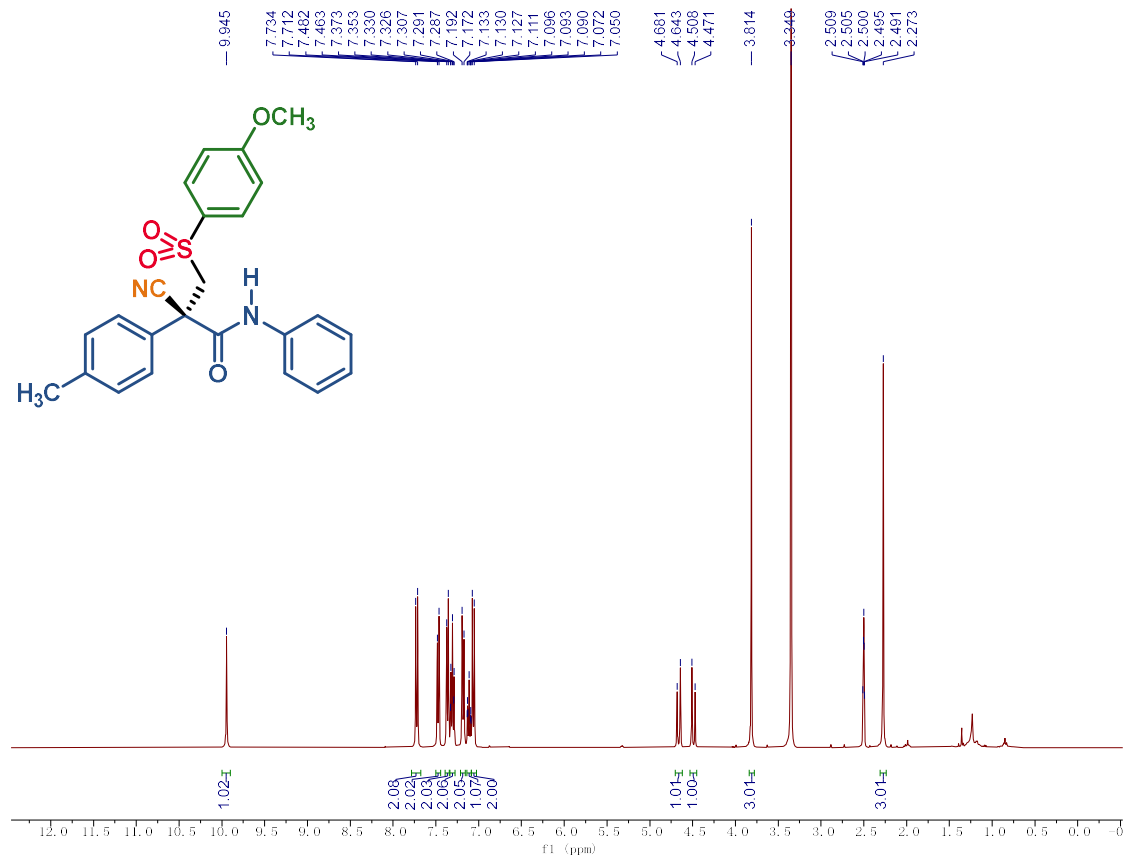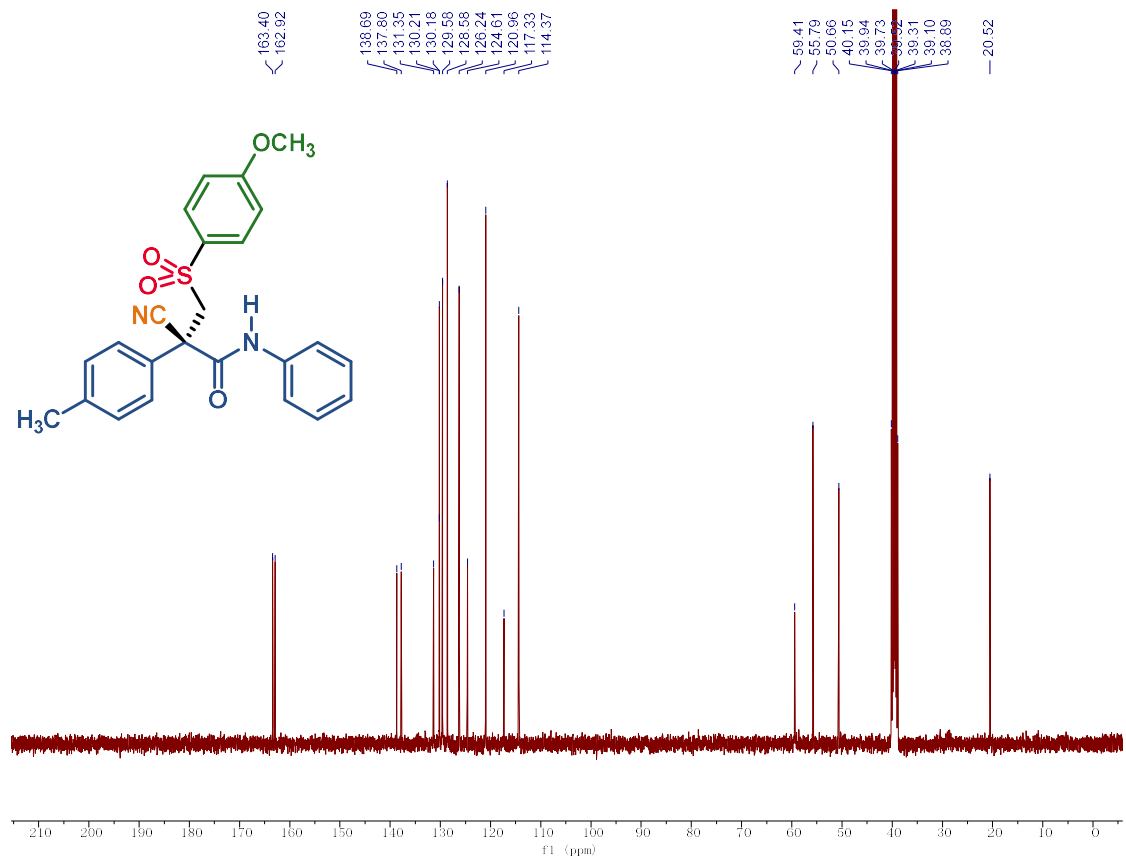

### NMR of Compound of 3v

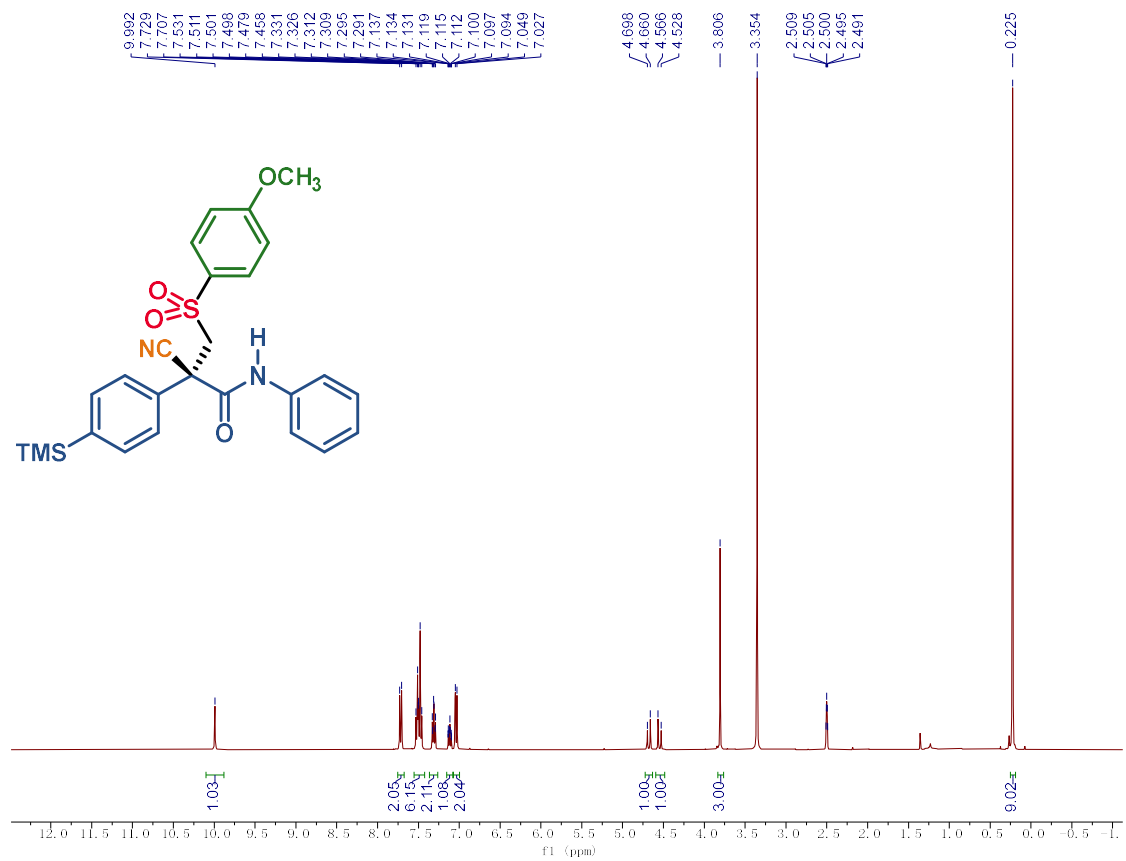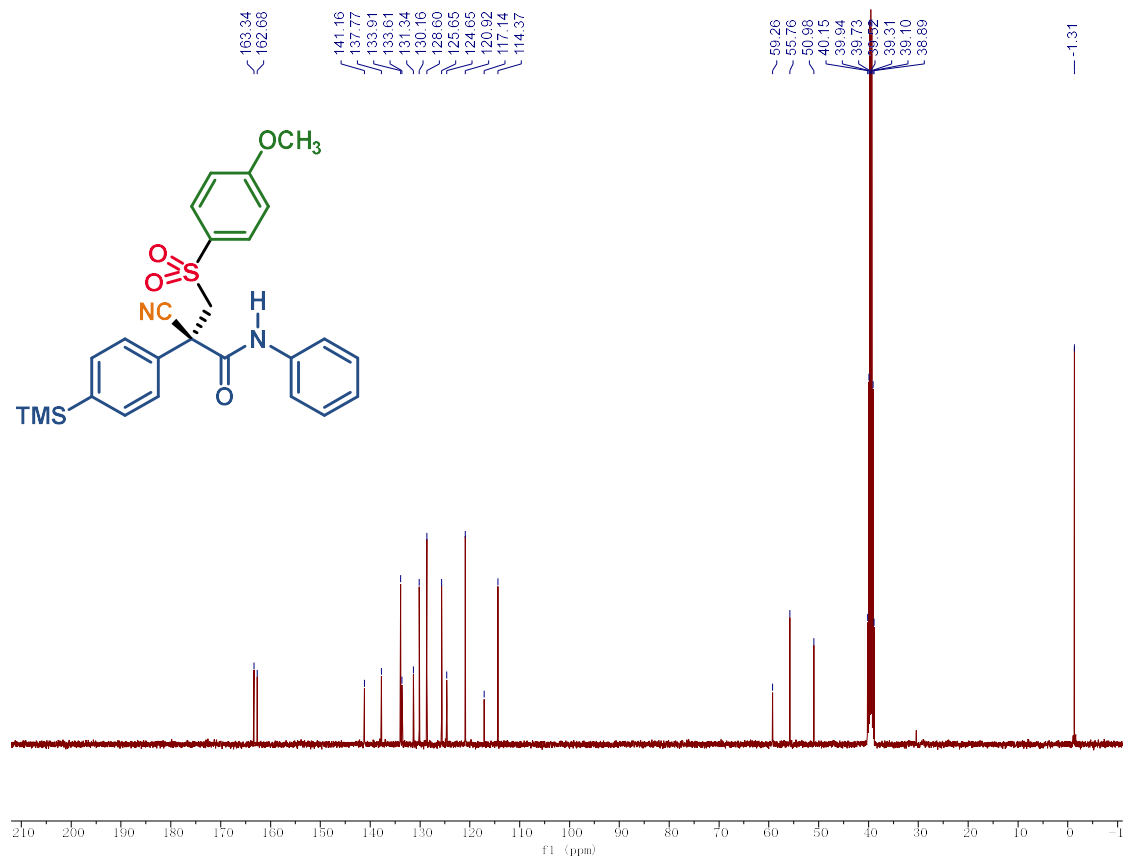



### NMR of Compound of 3w

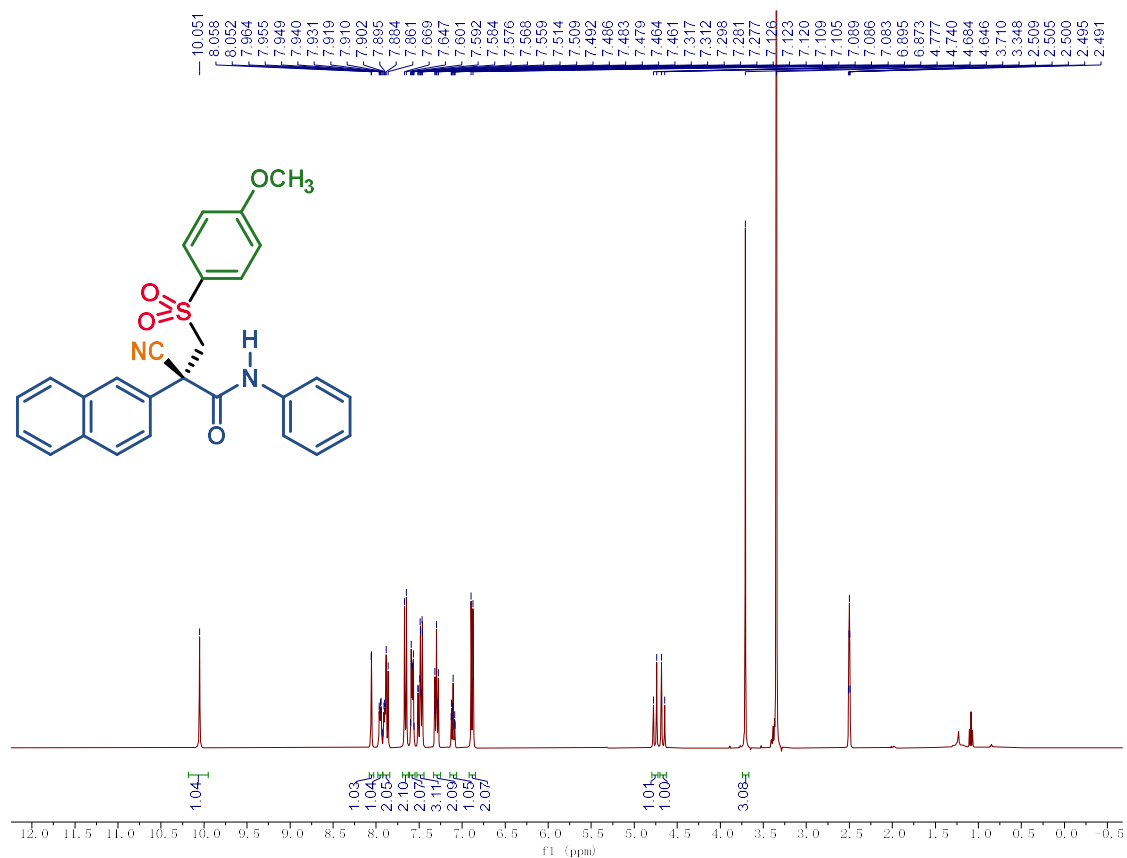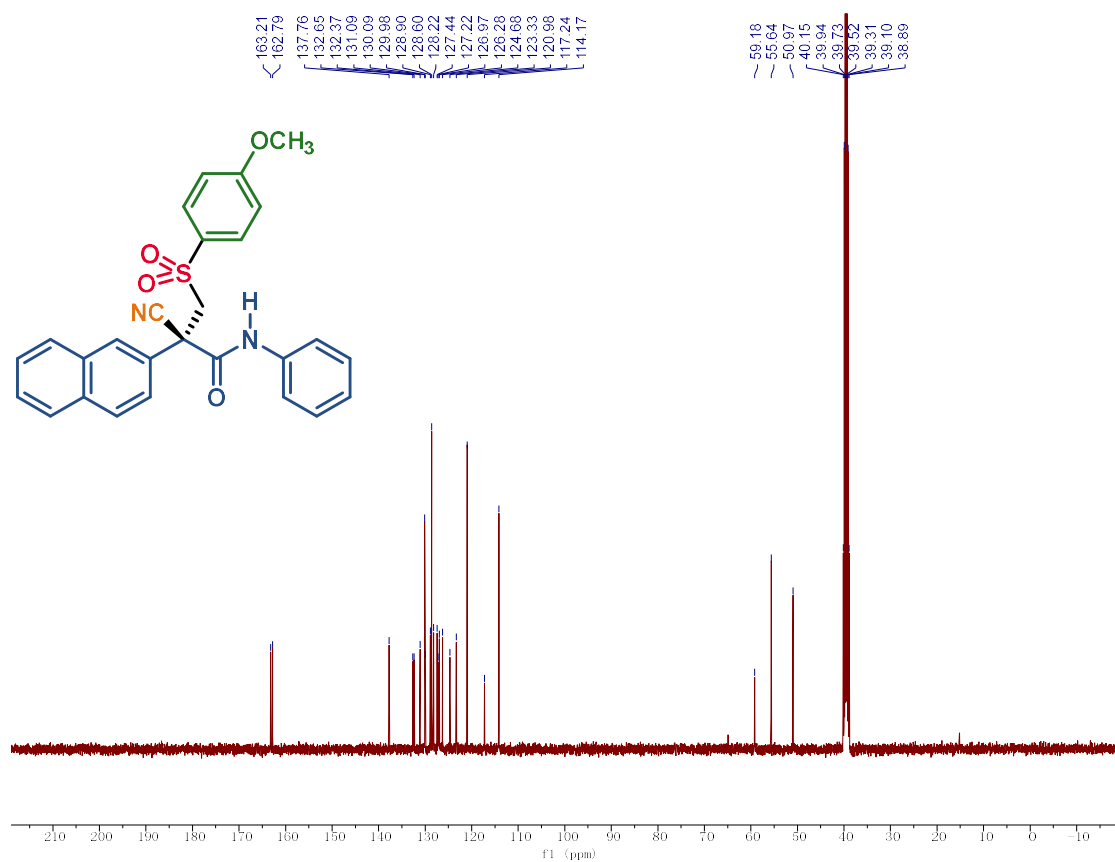

### NMR of Compound of 3x

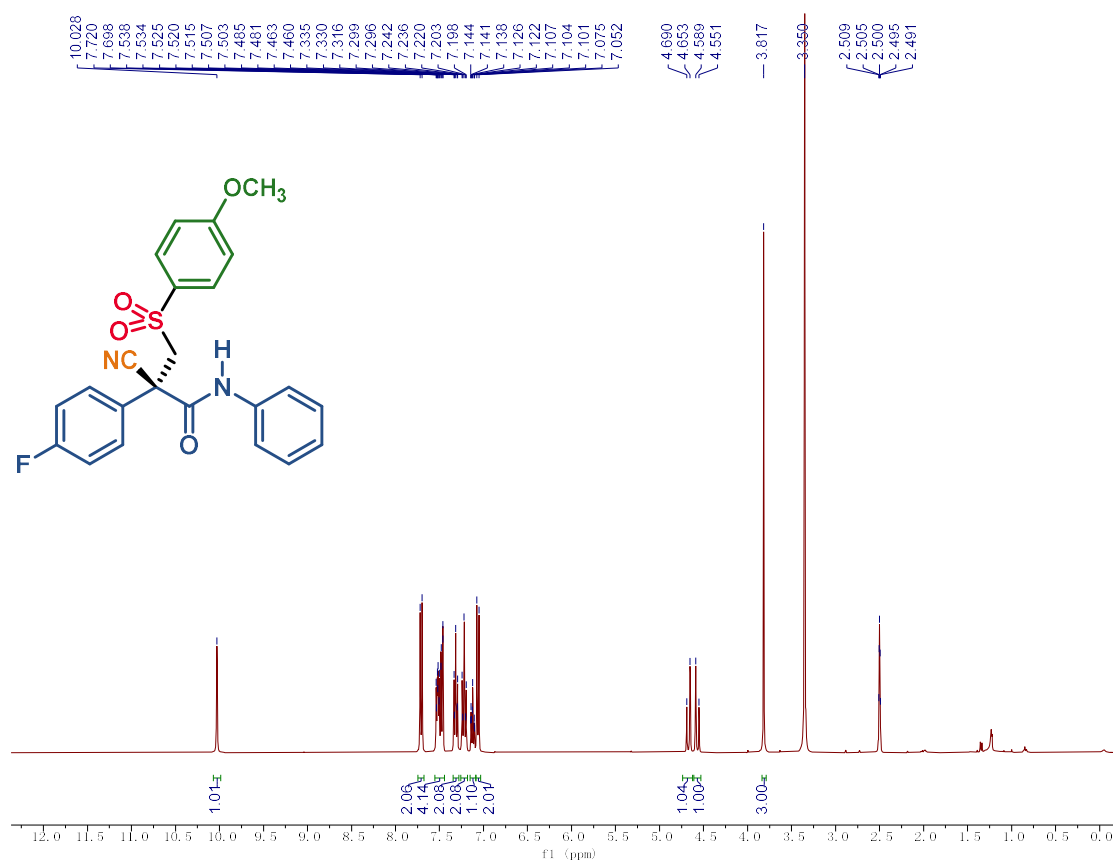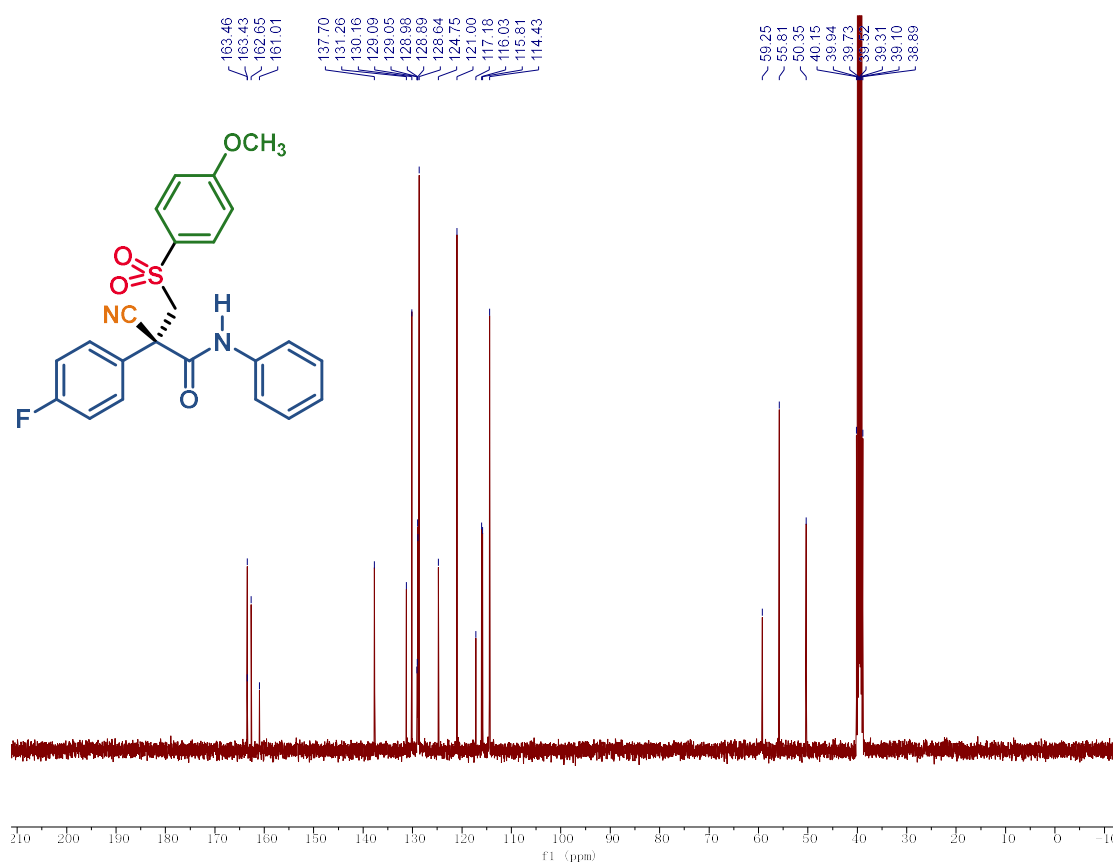

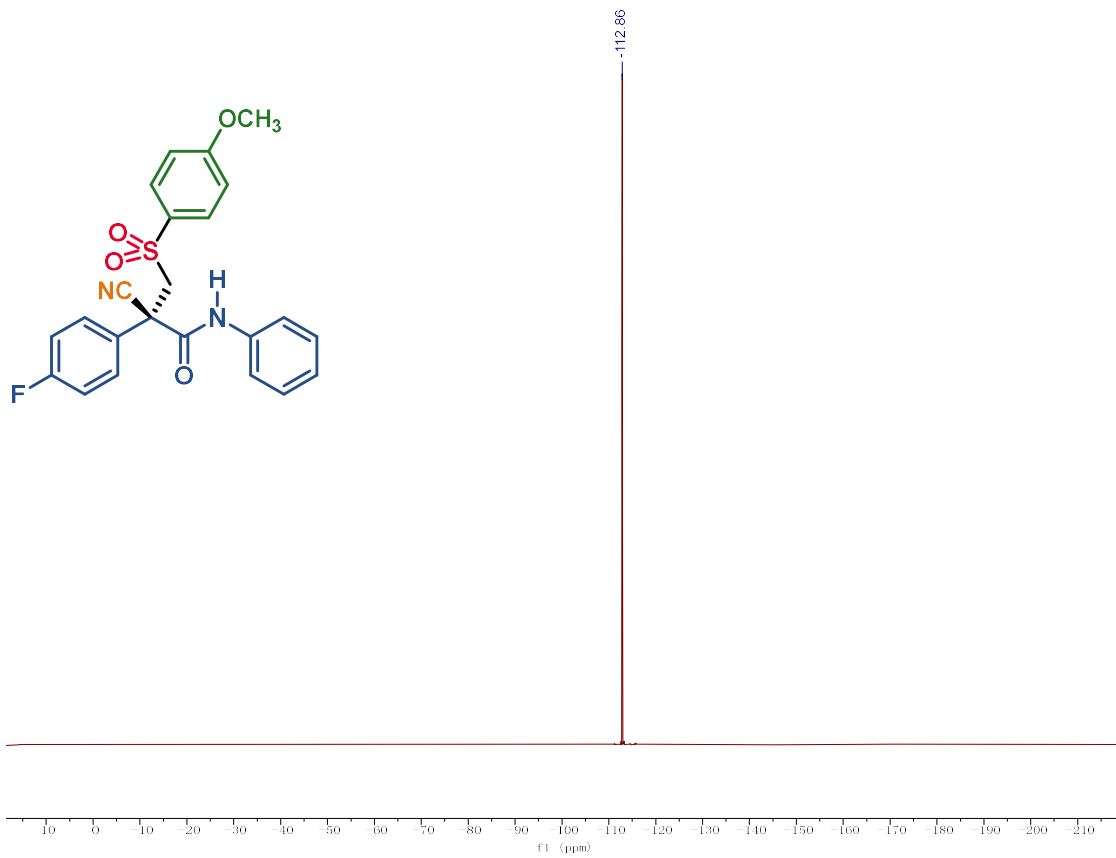

### NMR of Compound of 3y

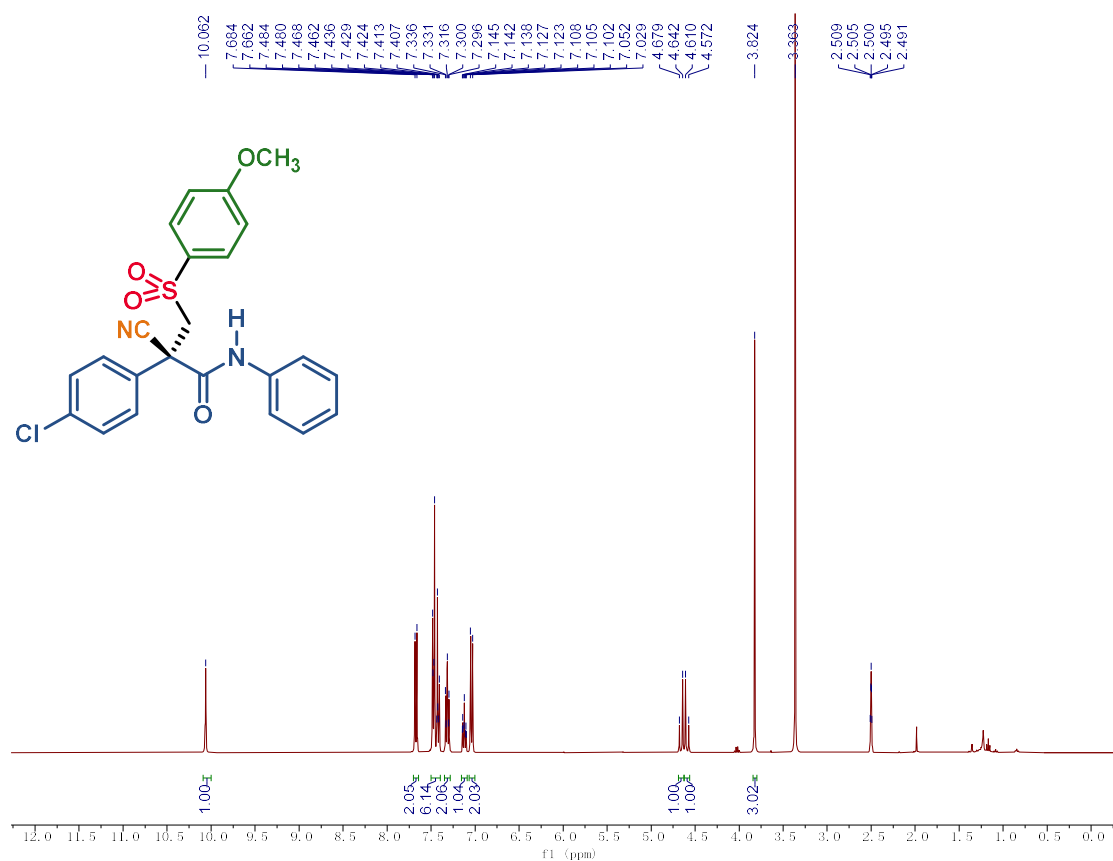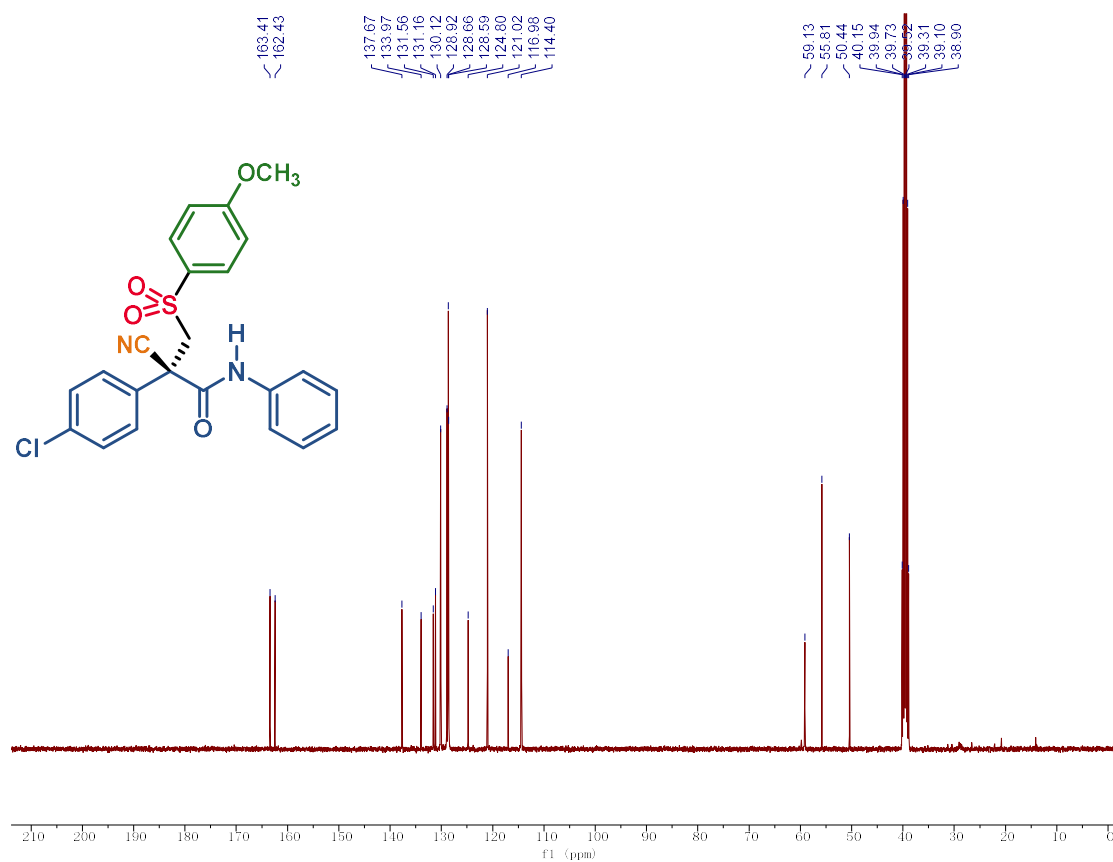

### NMR of Compound of 3z

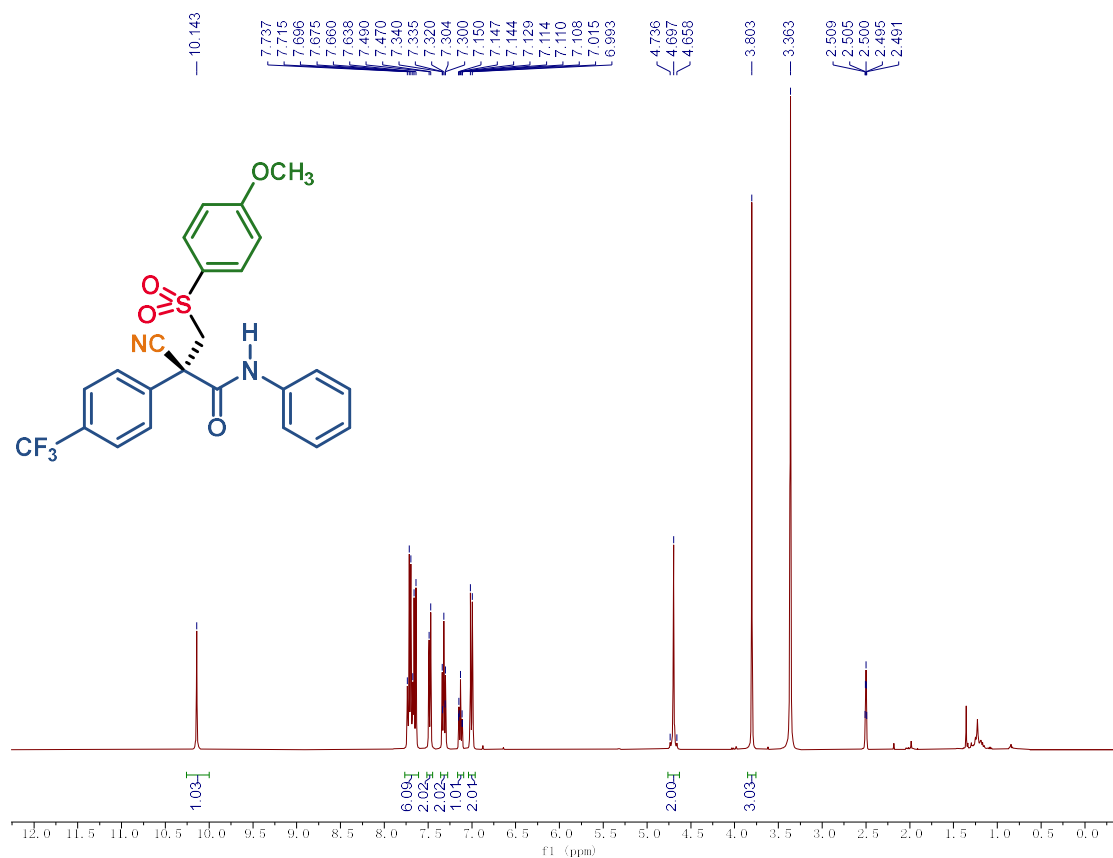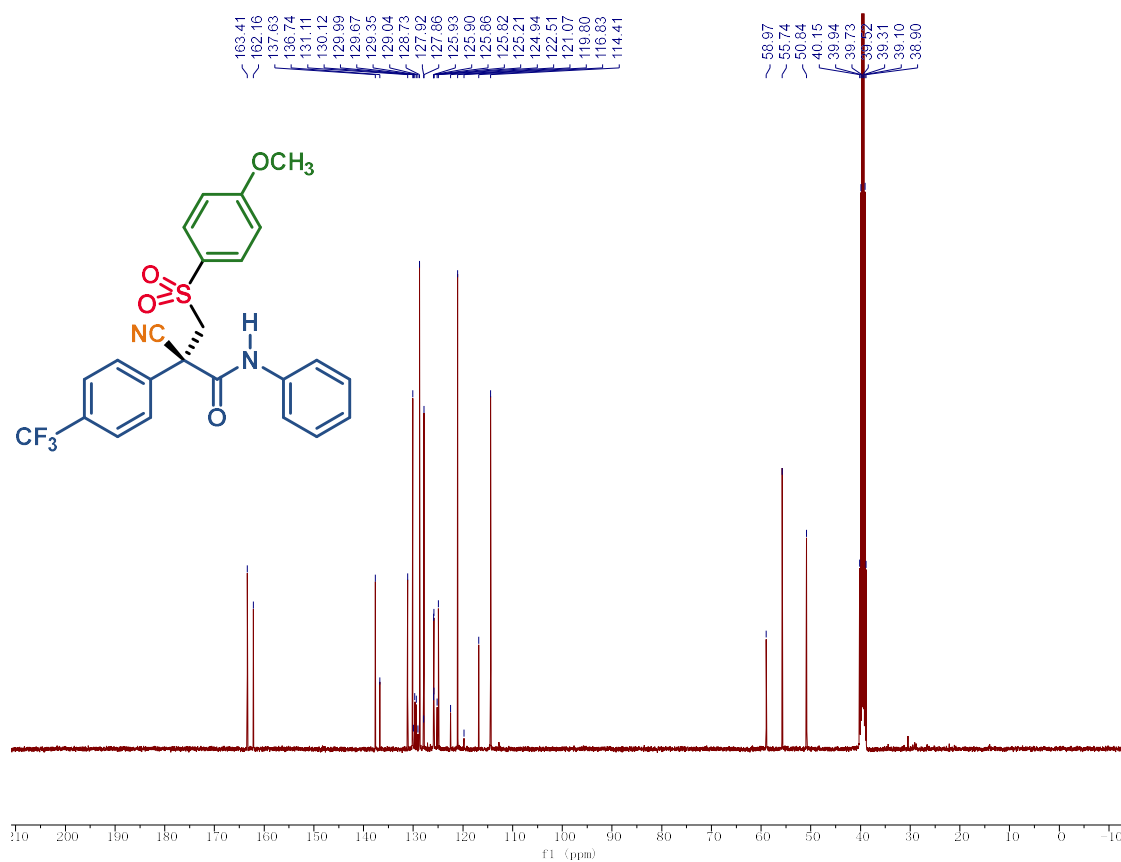

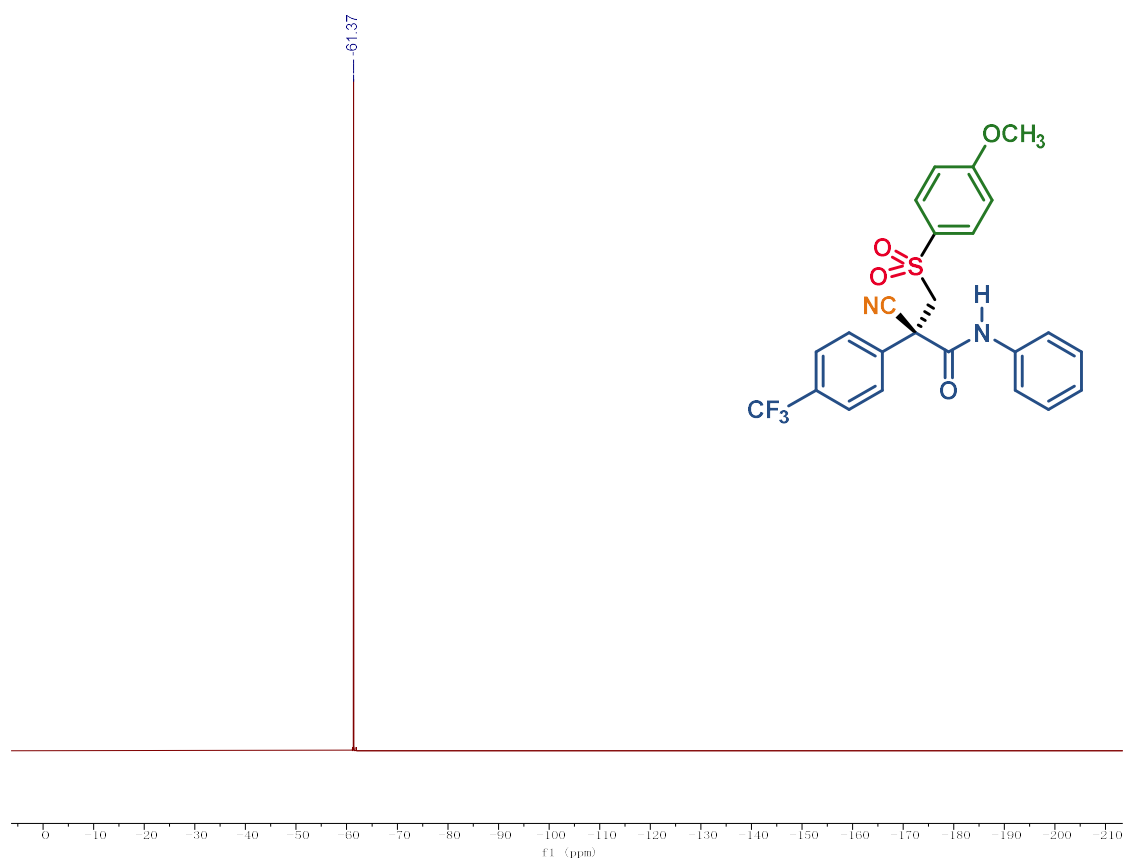

### NMR of Compound of 3aa

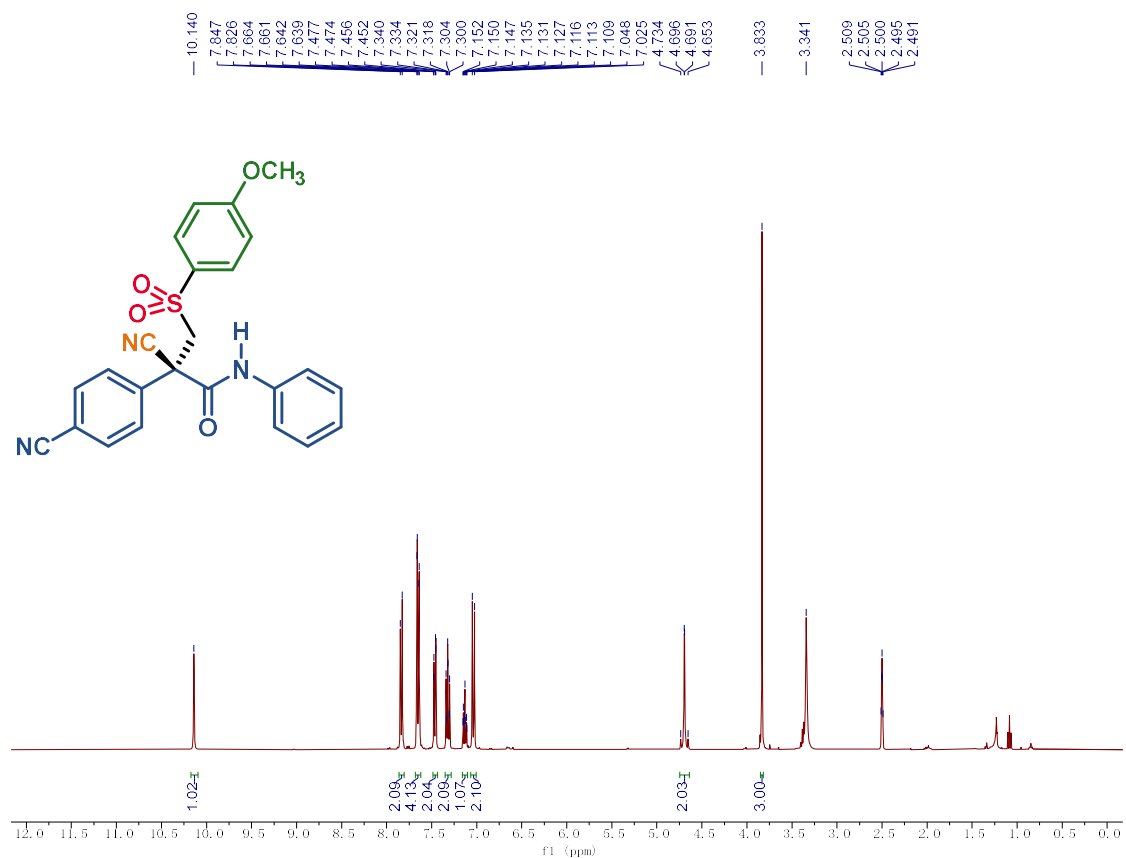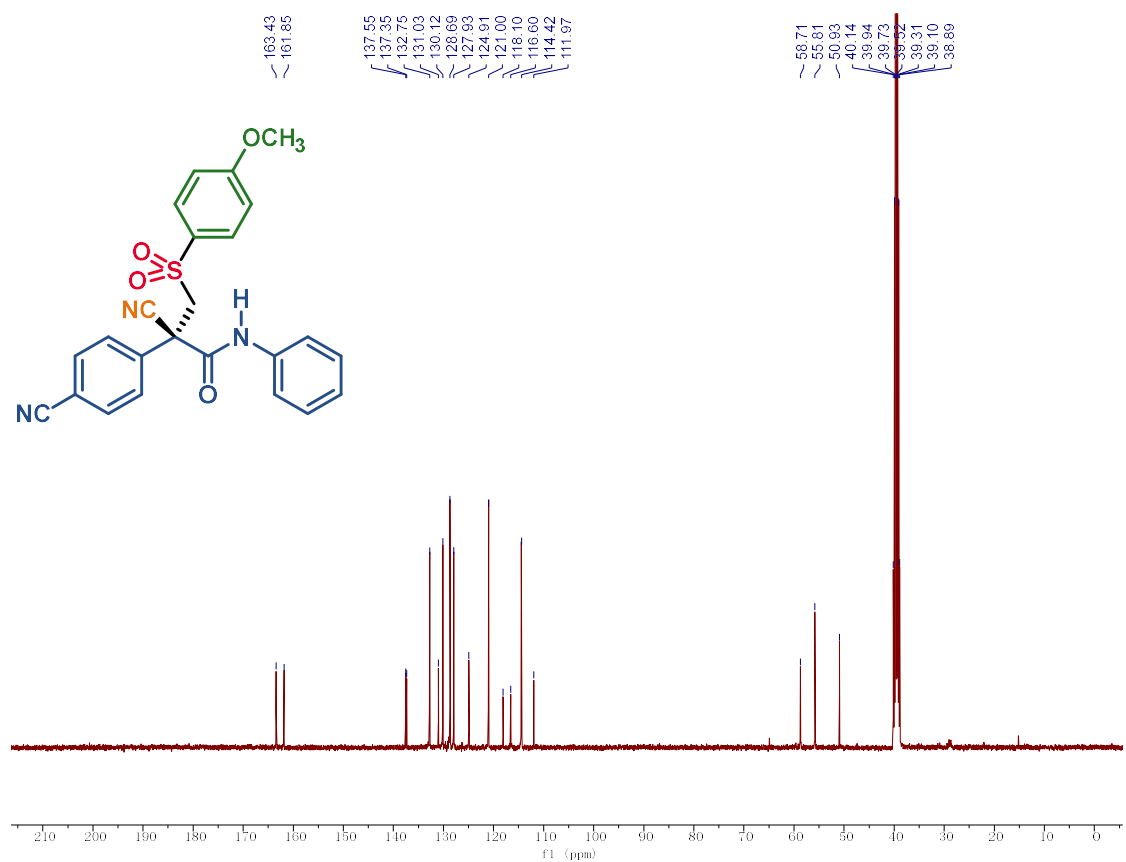

### NMR of Compound of 3ab

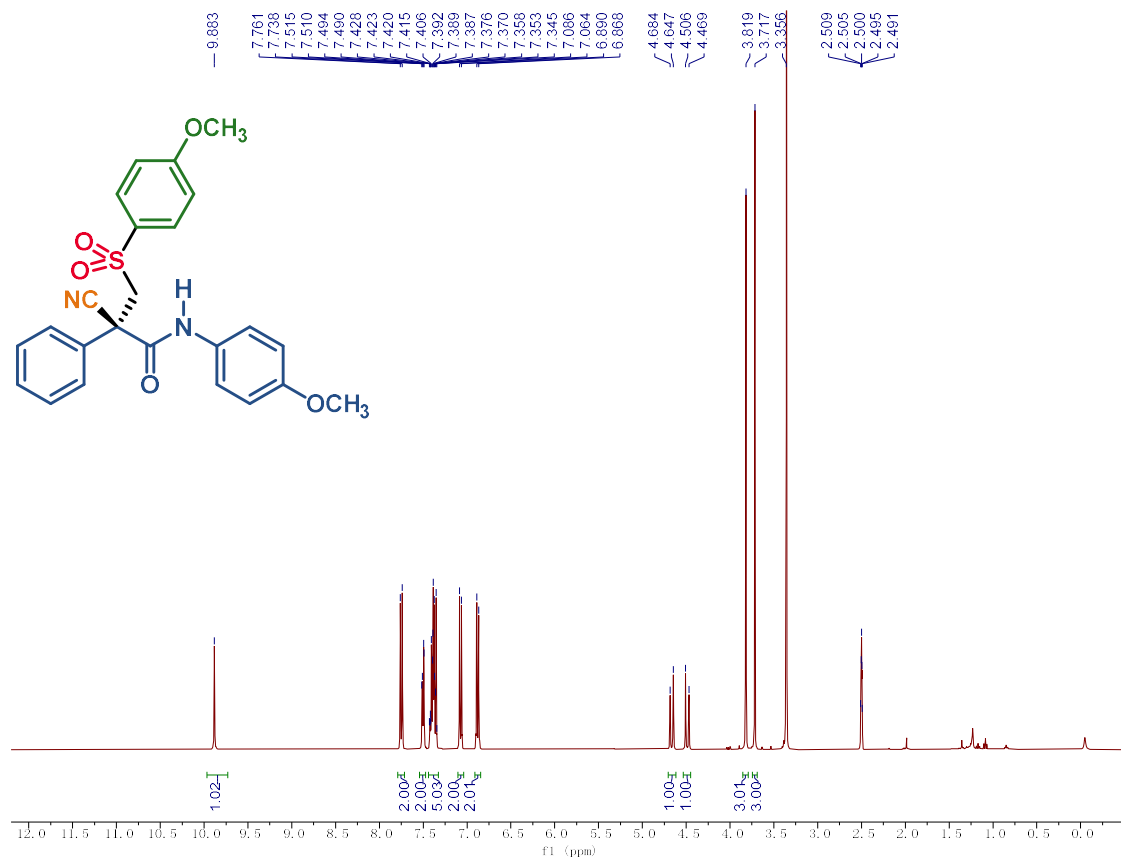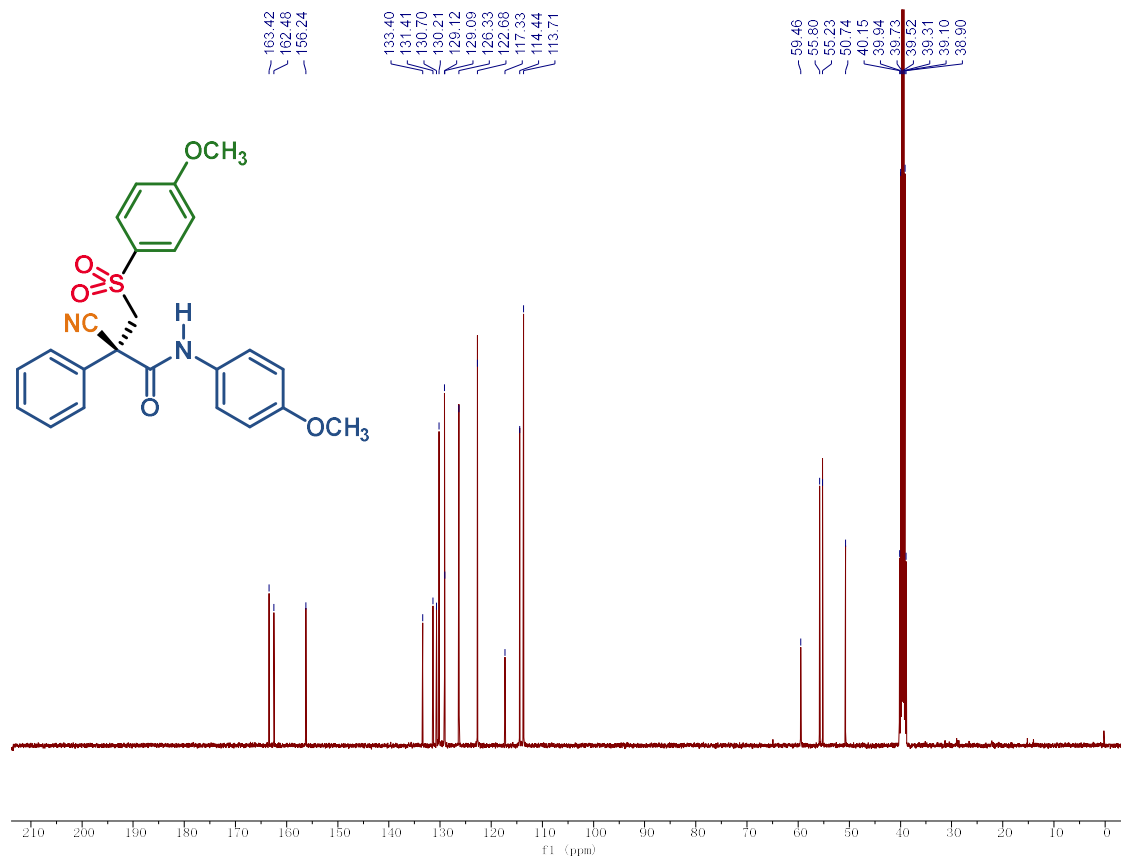



### NMR of Compound of 3ac

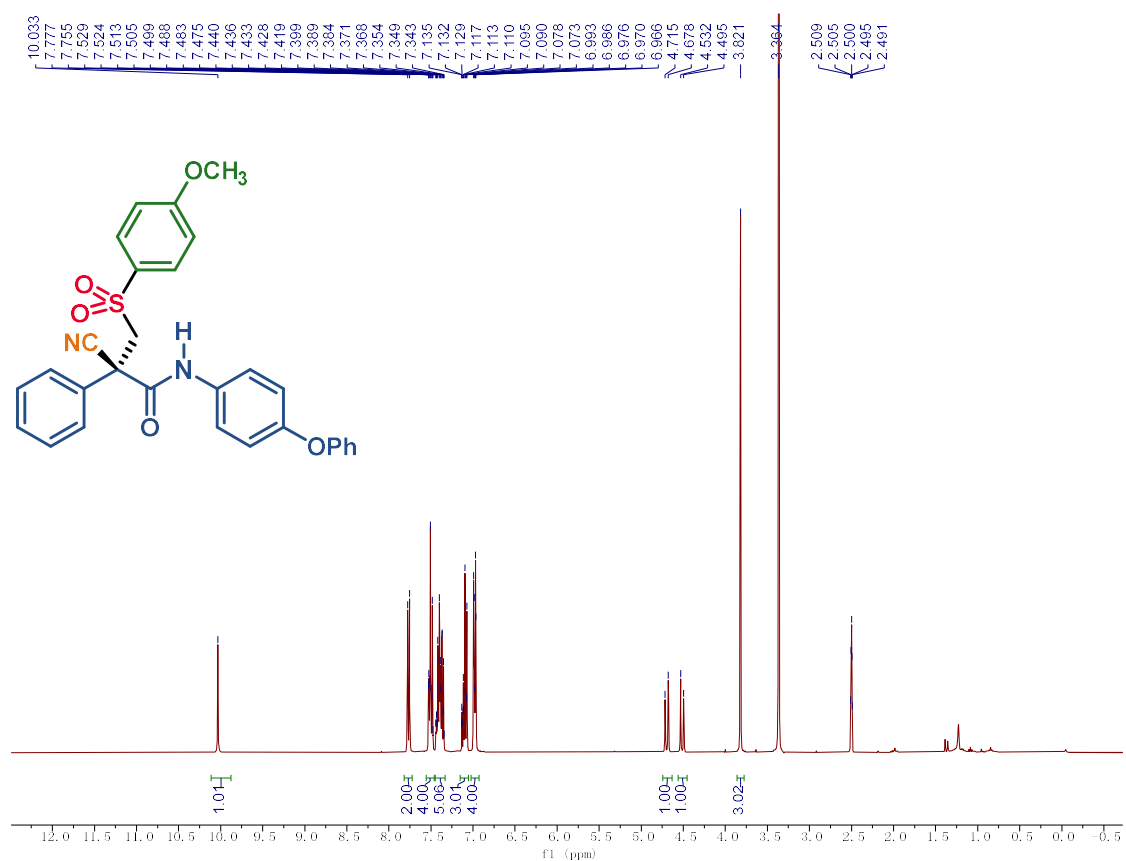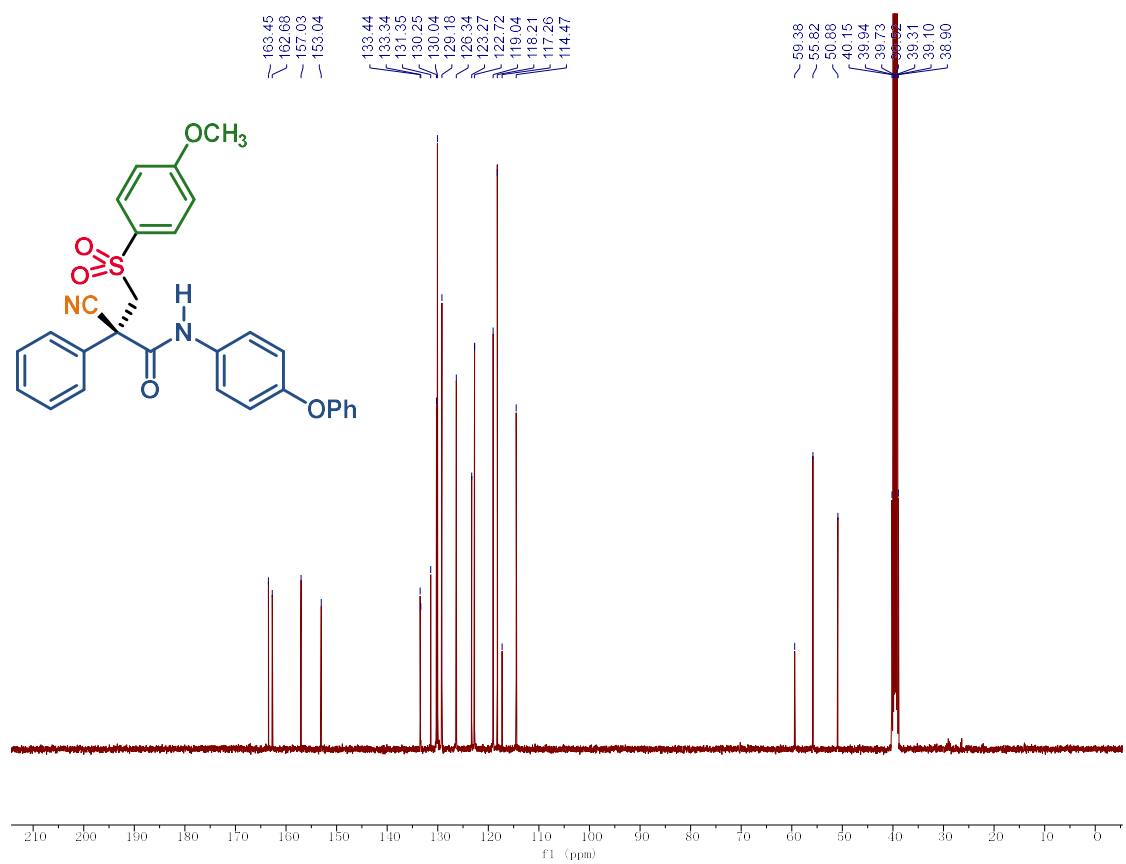

### NMR of Compound of 3ad

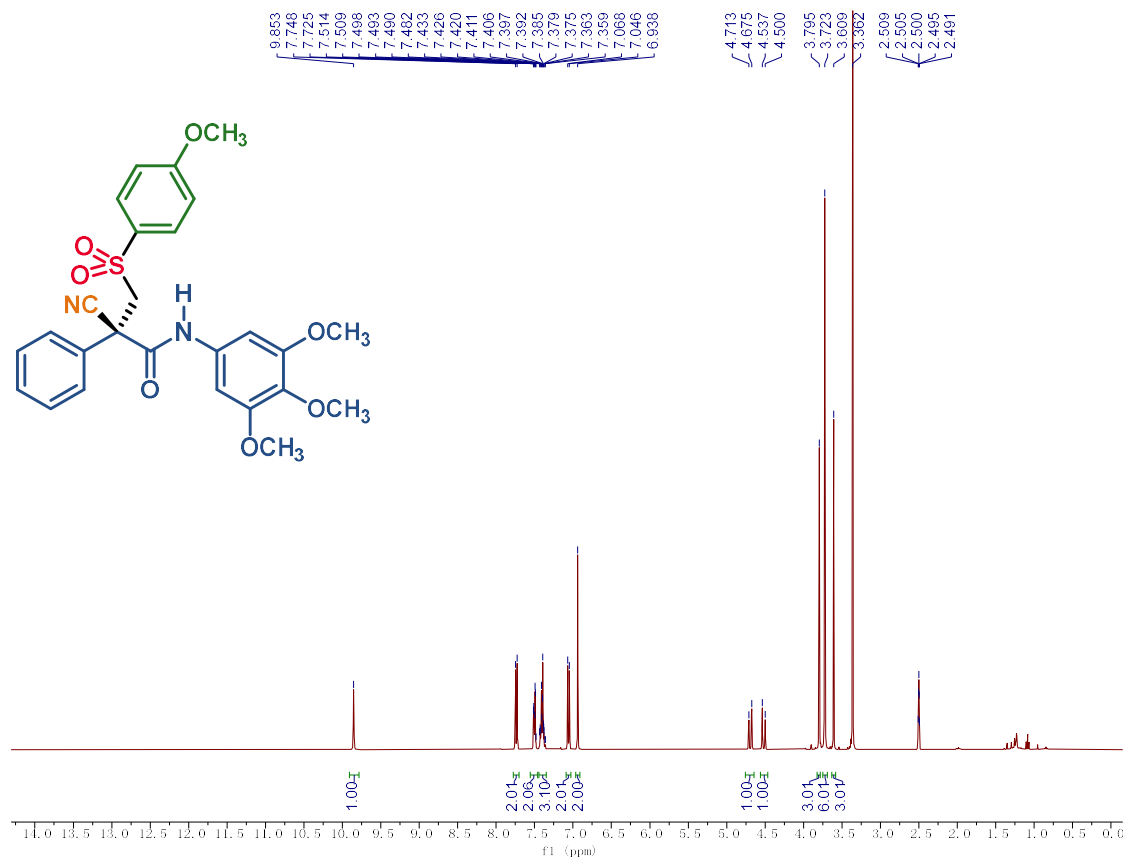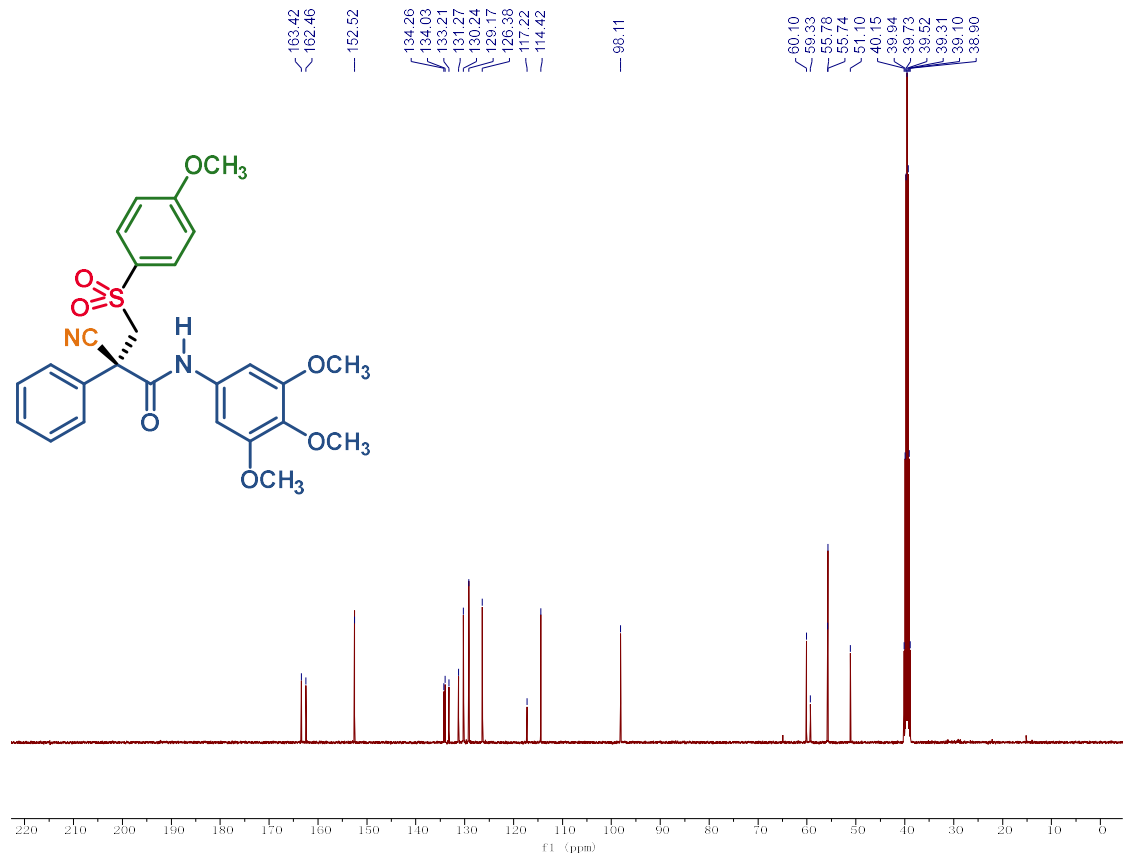

### NMR of Compound of 3ae

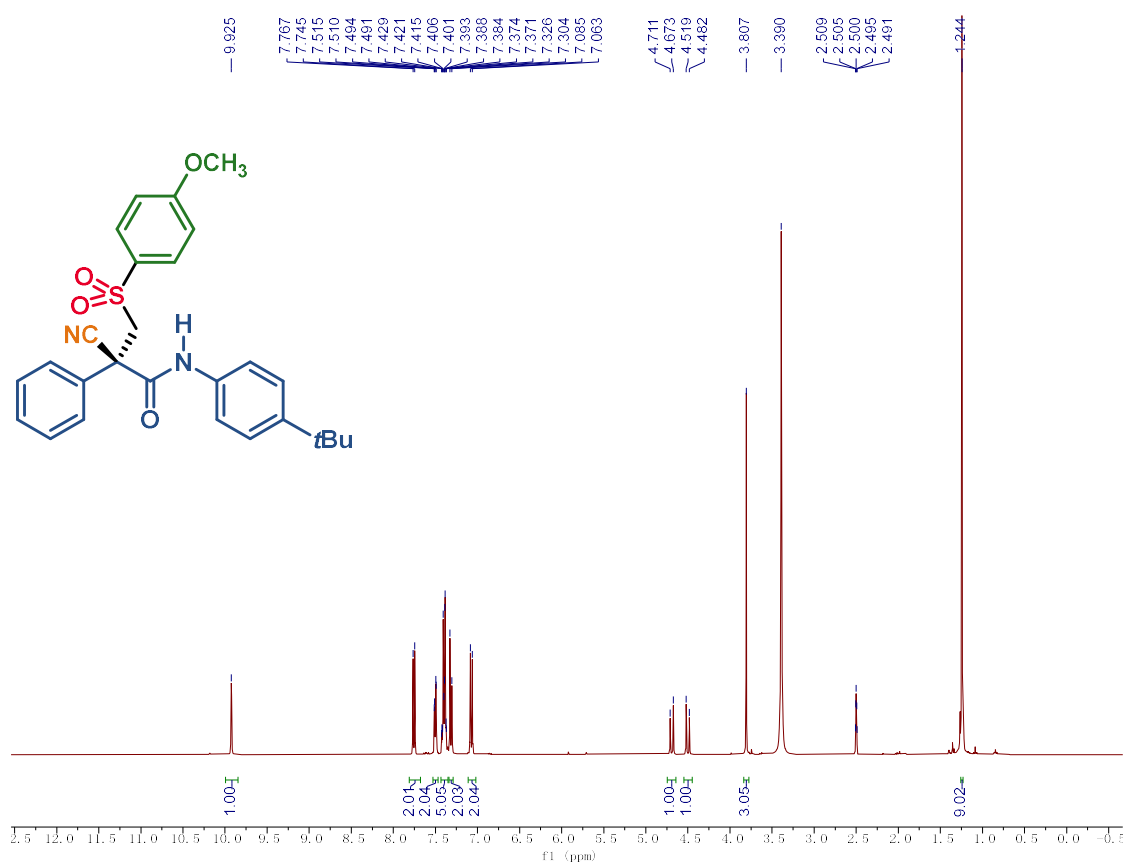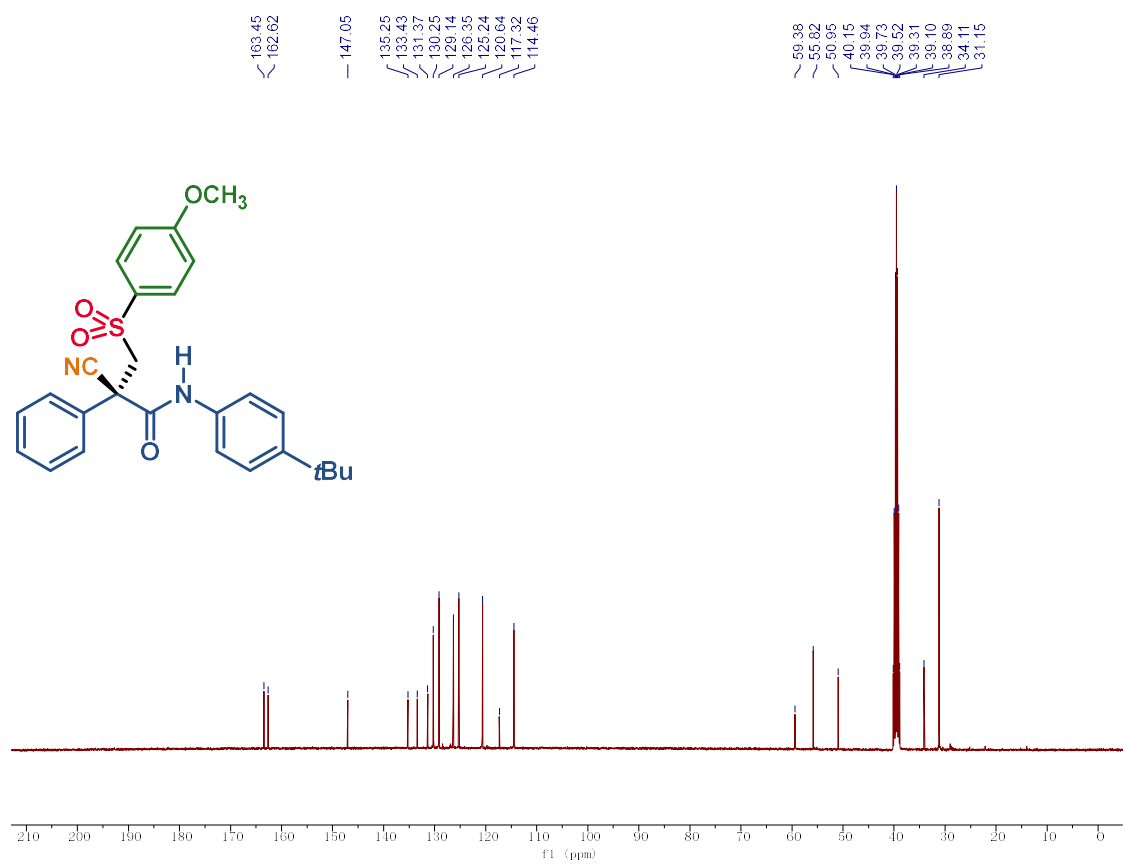

### NMR of Compound of 3af

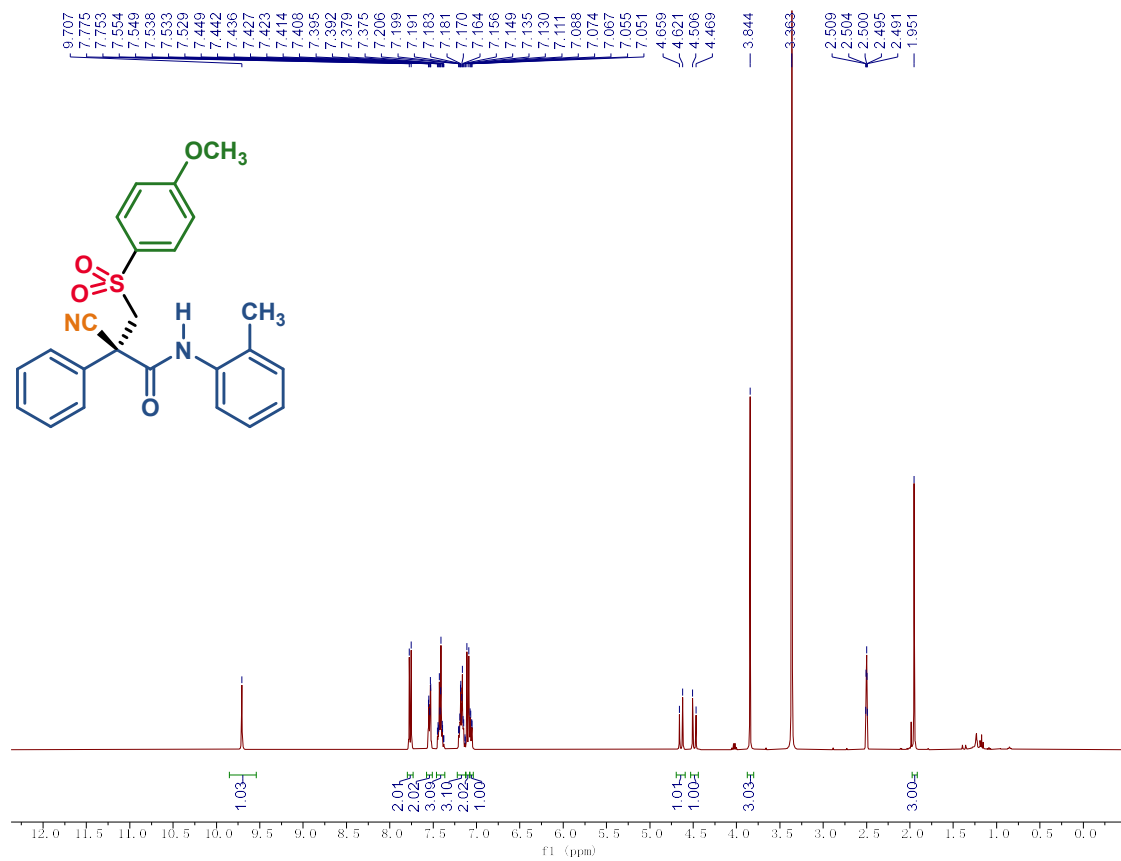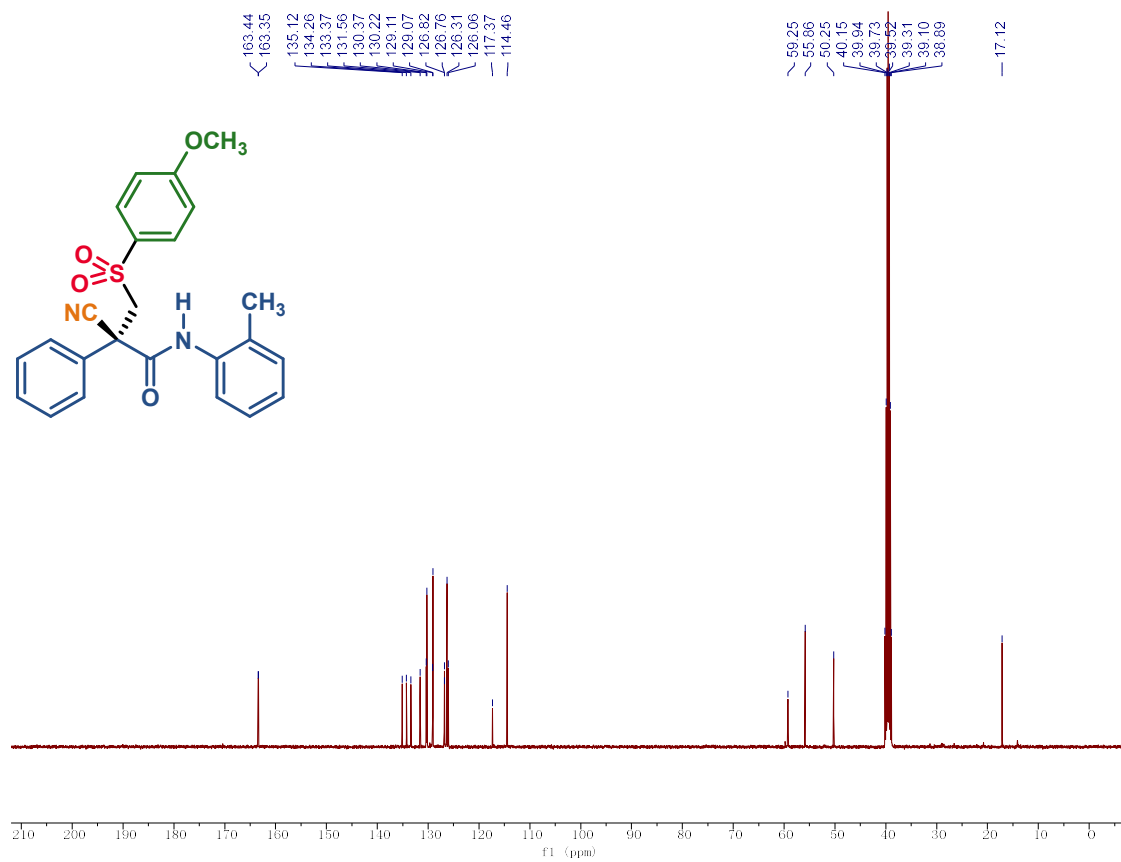

### NMR of Compound of 3ag

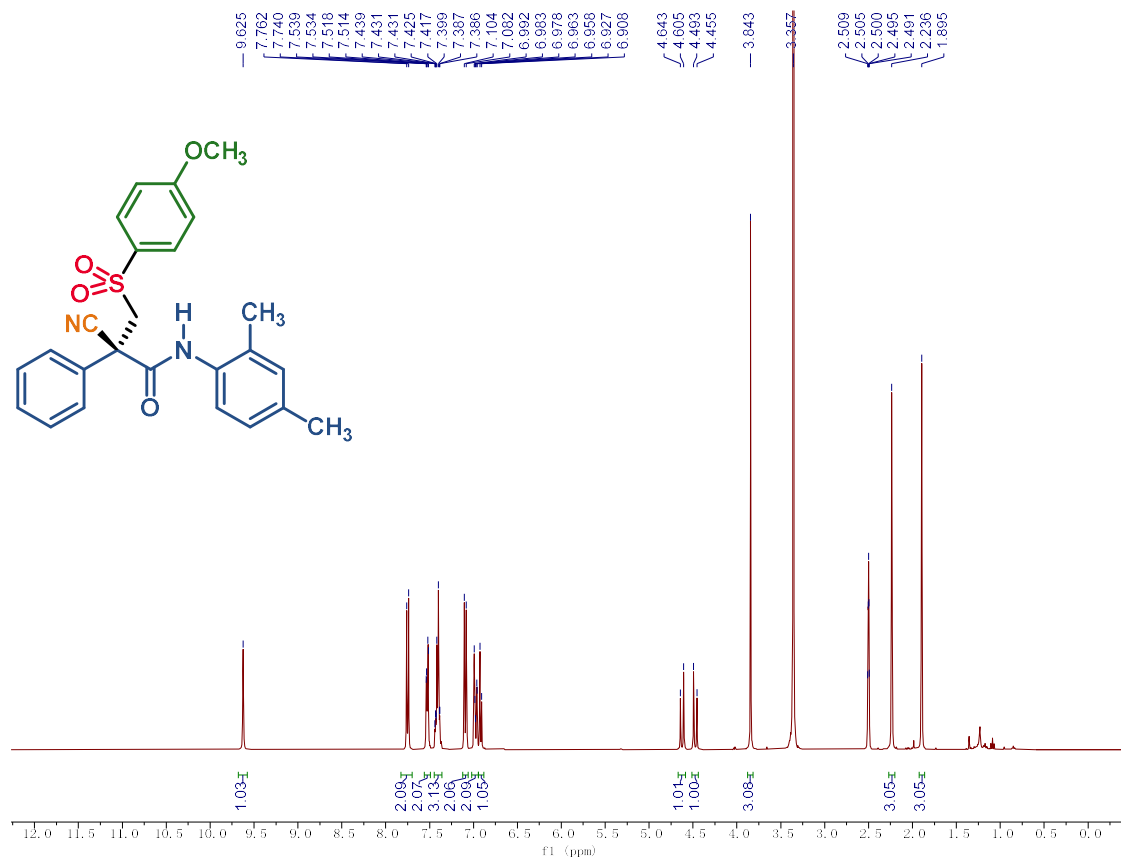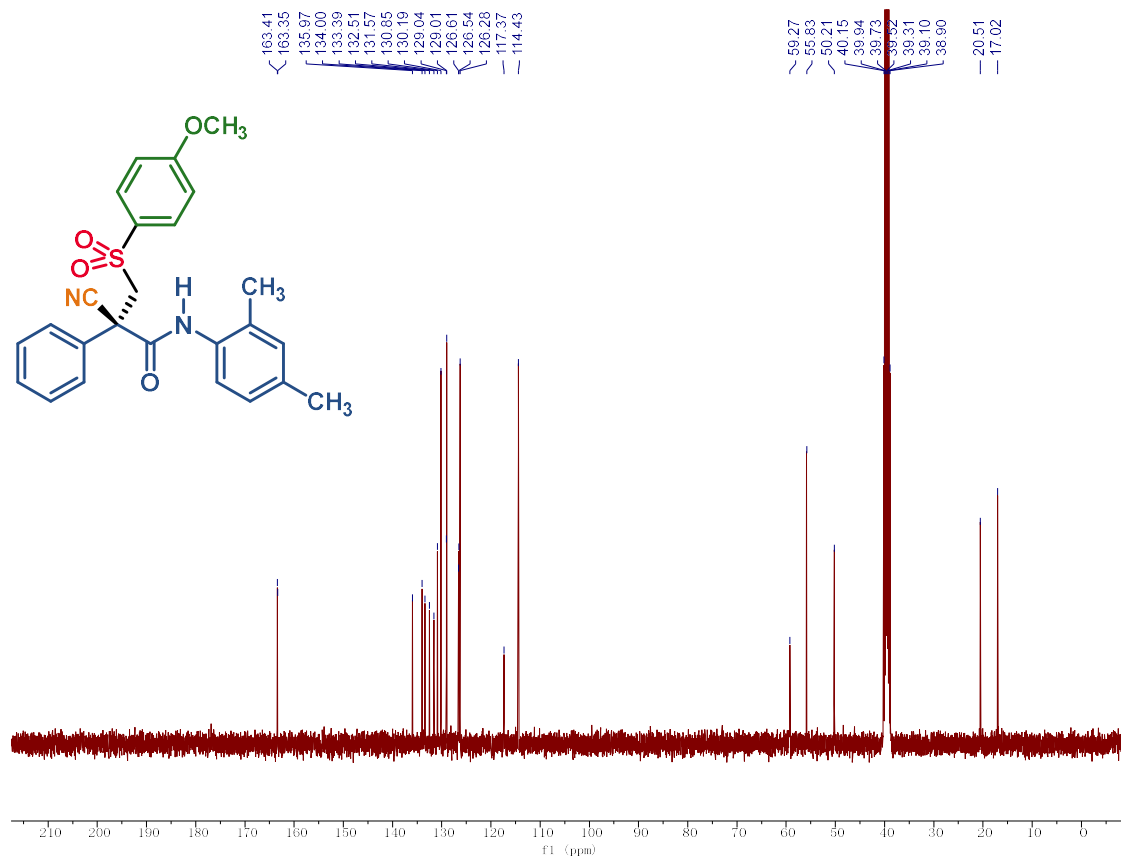

### NMR of Compound of 3ah

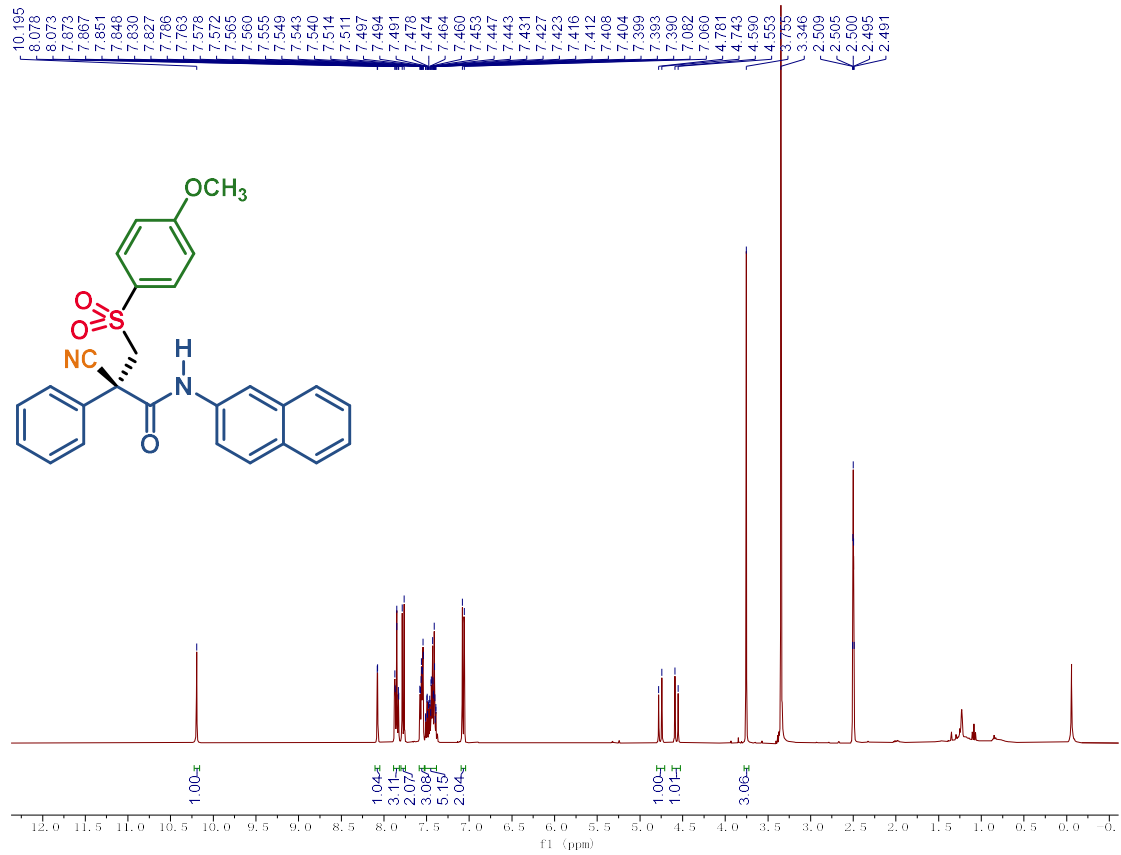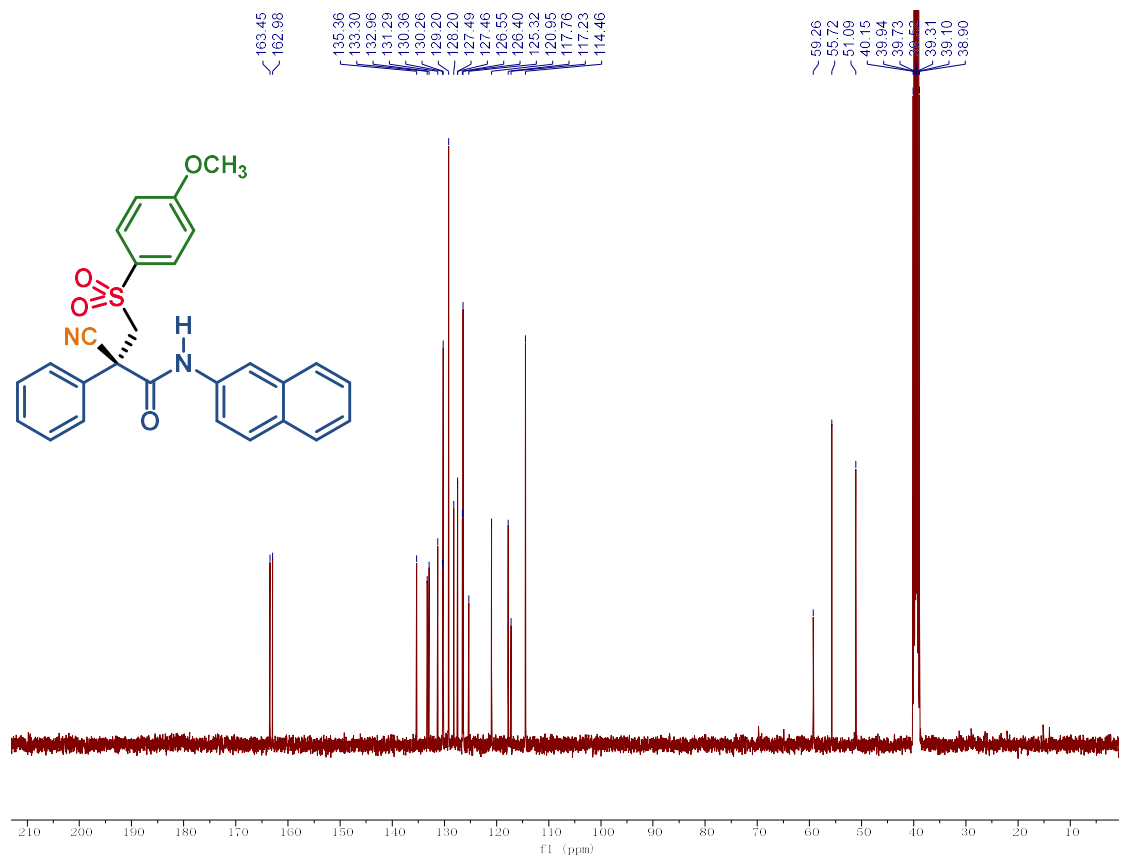

### NMR of Compound of 3ai

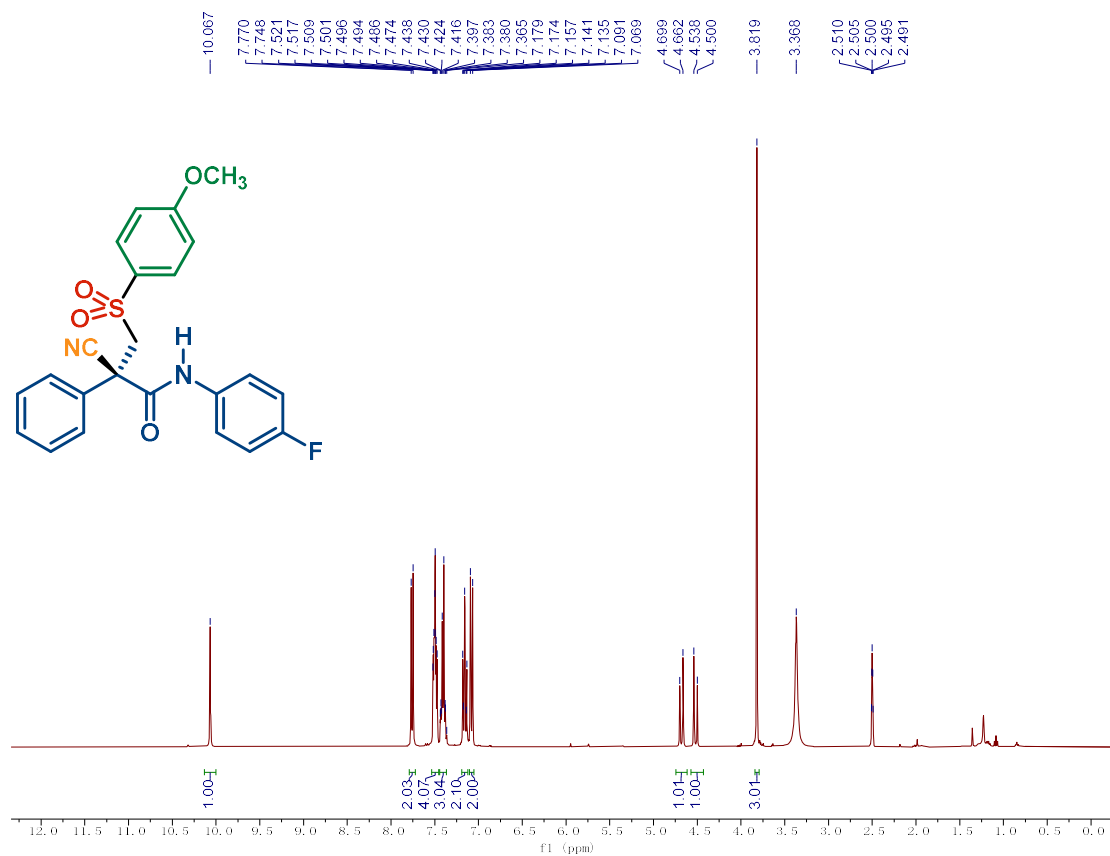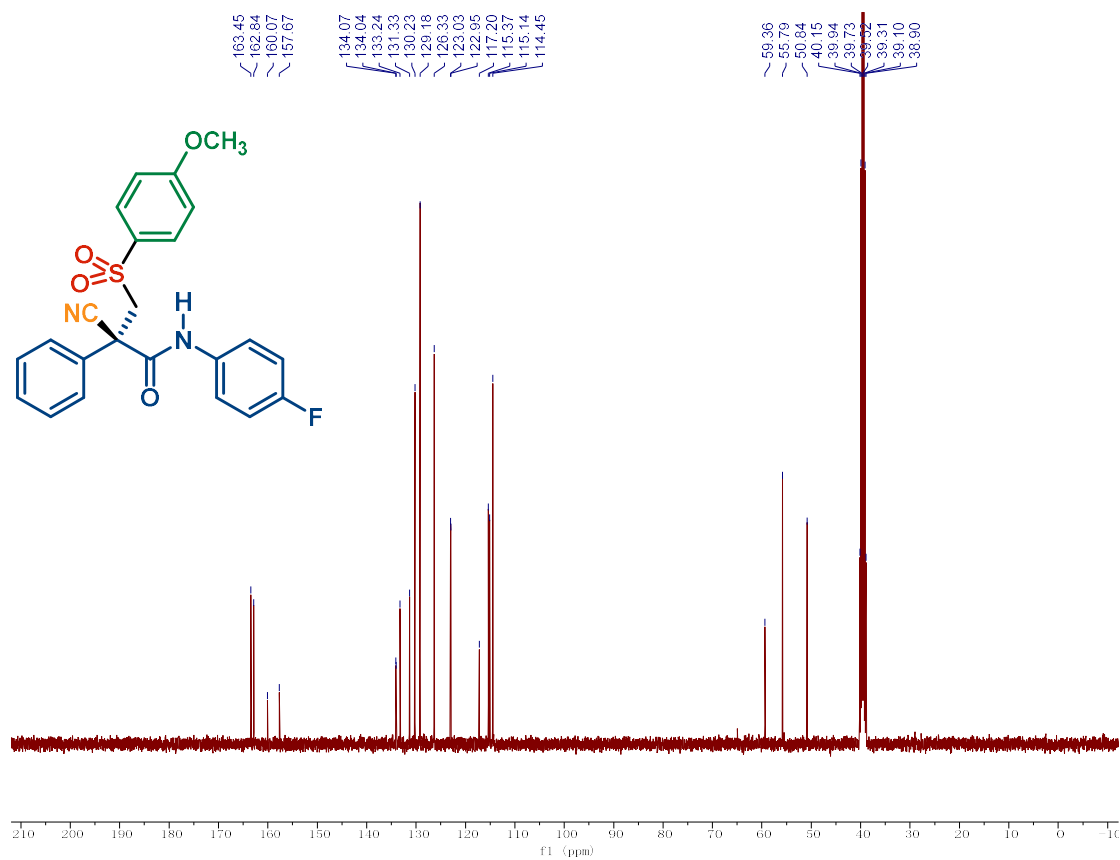

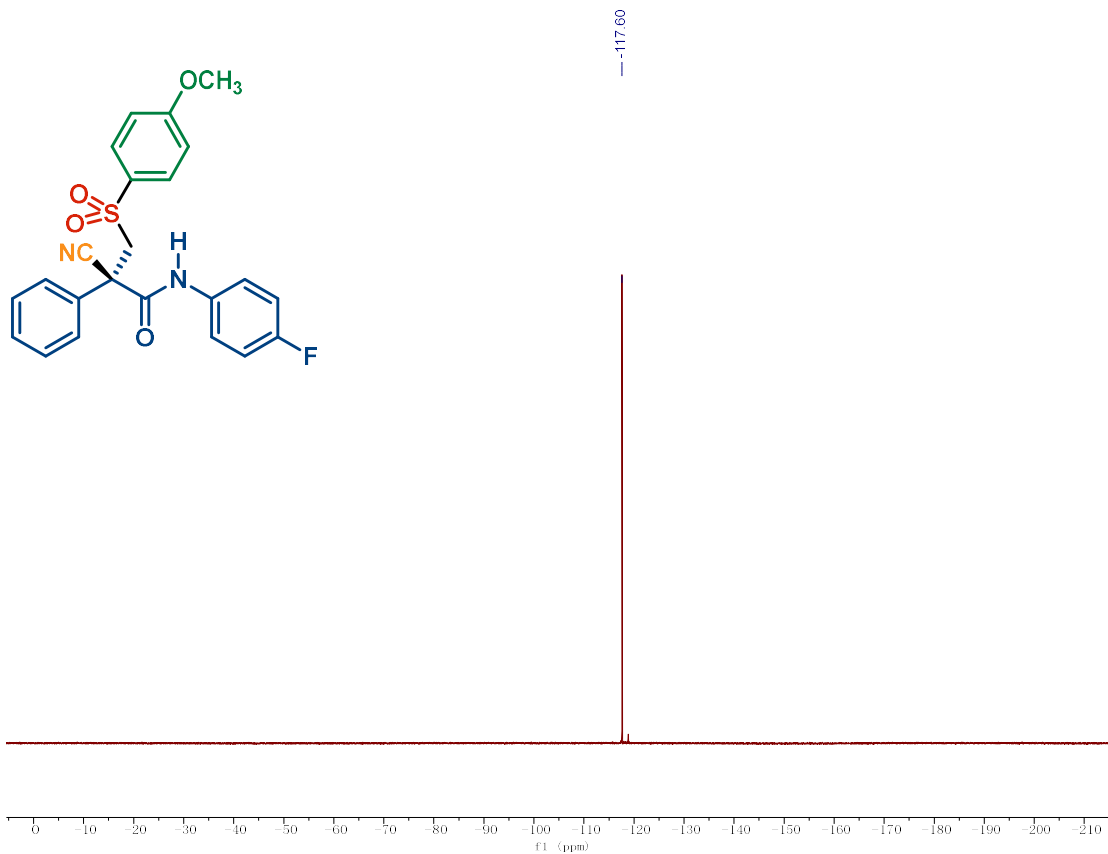



### NMR of Compound of 3aj

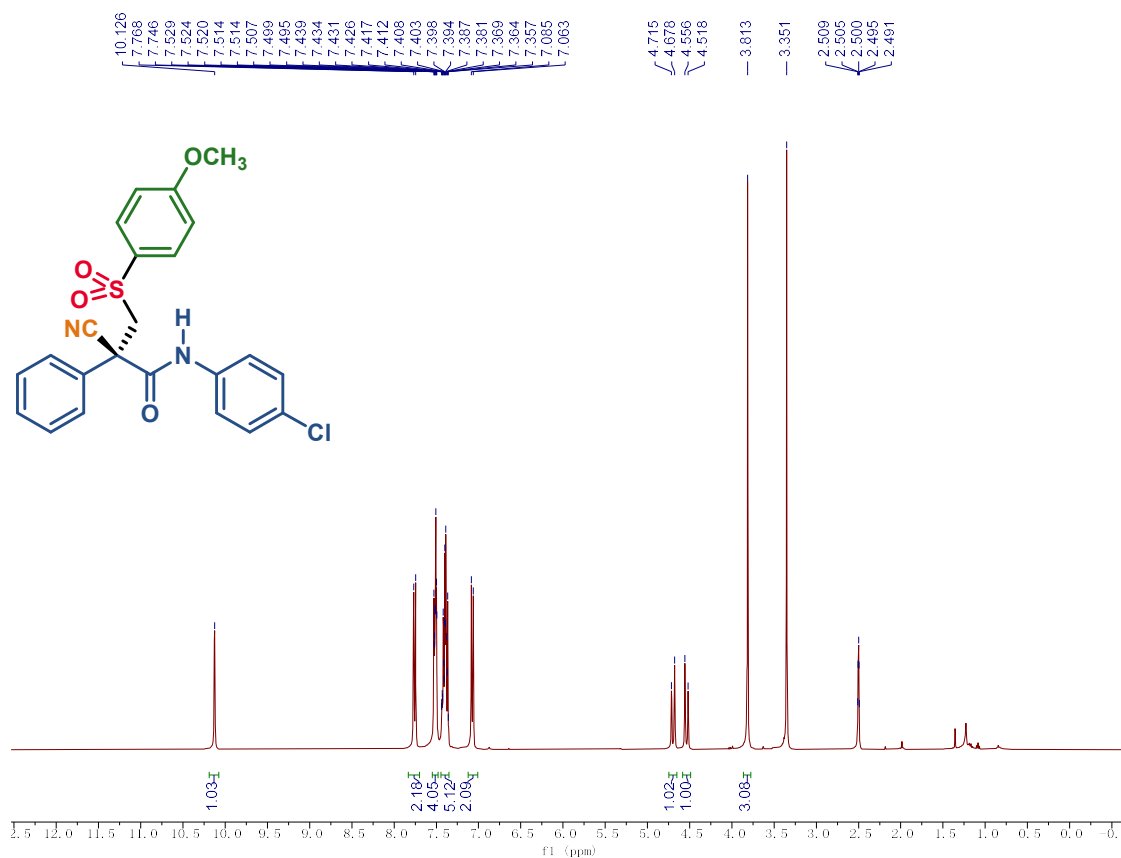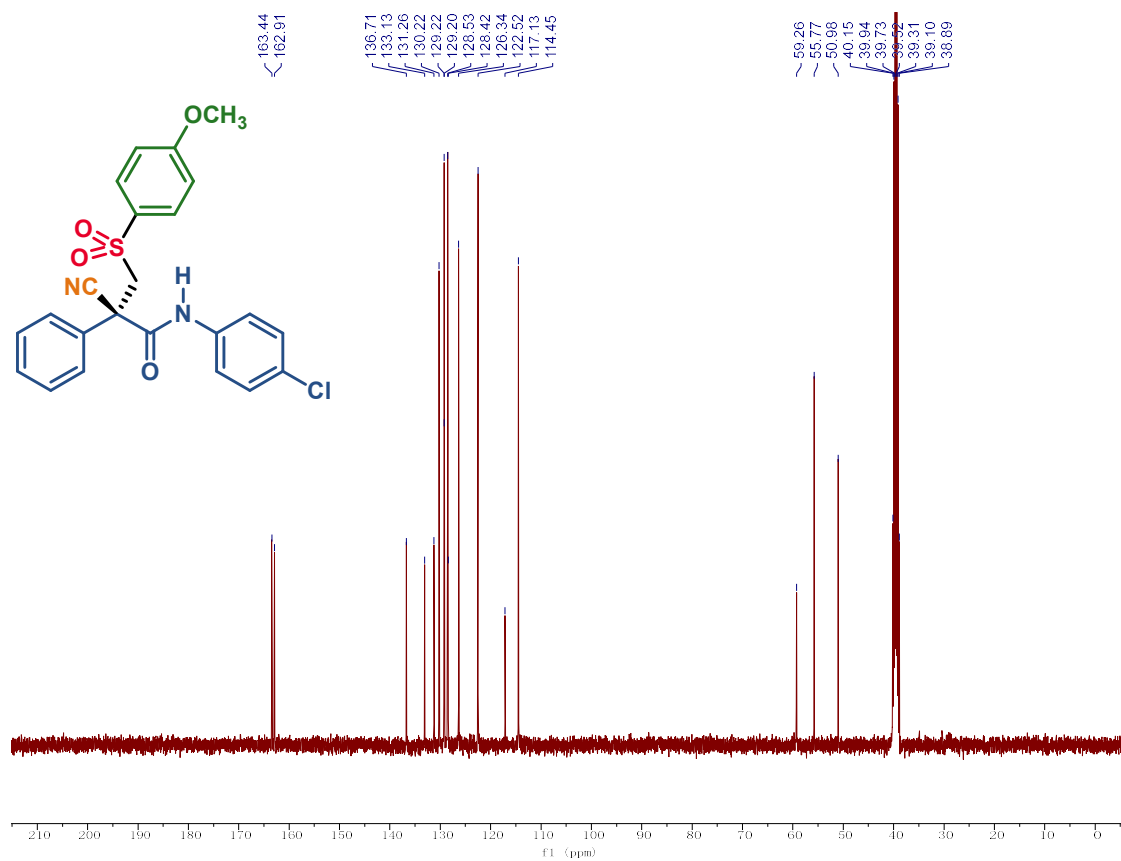

### NMR of Compound of 3ak

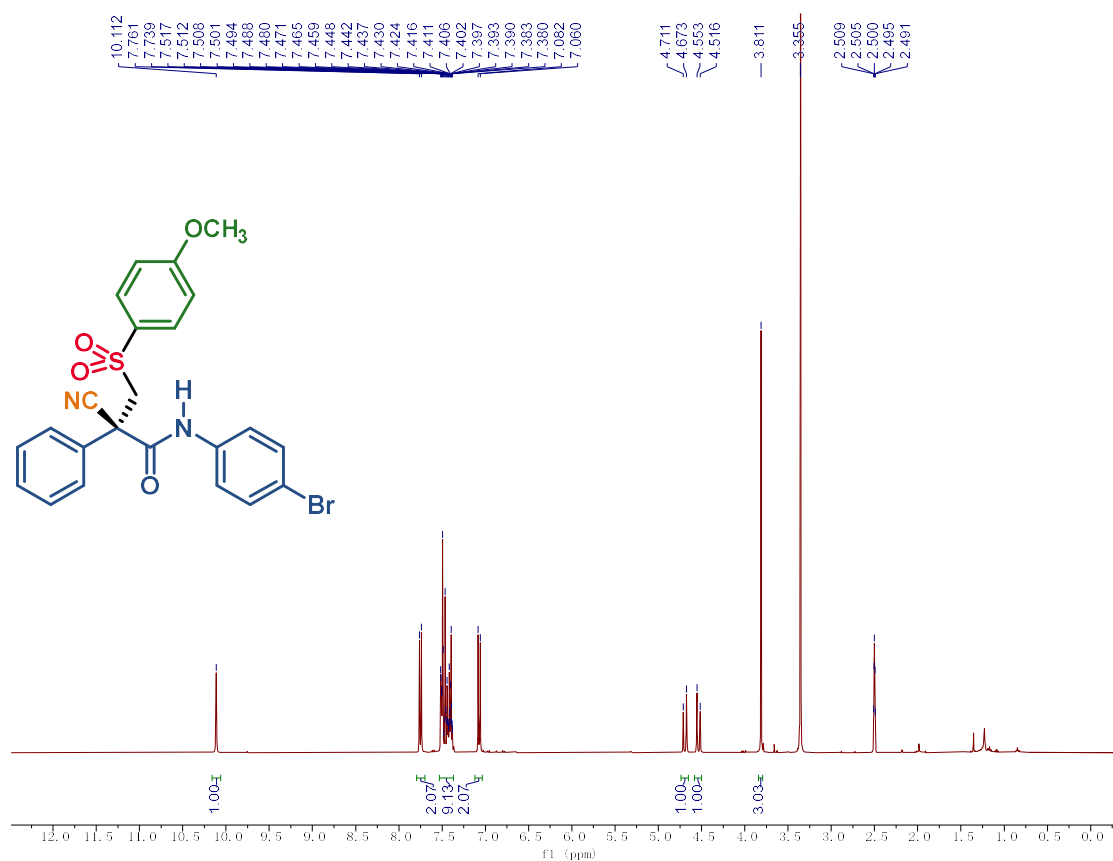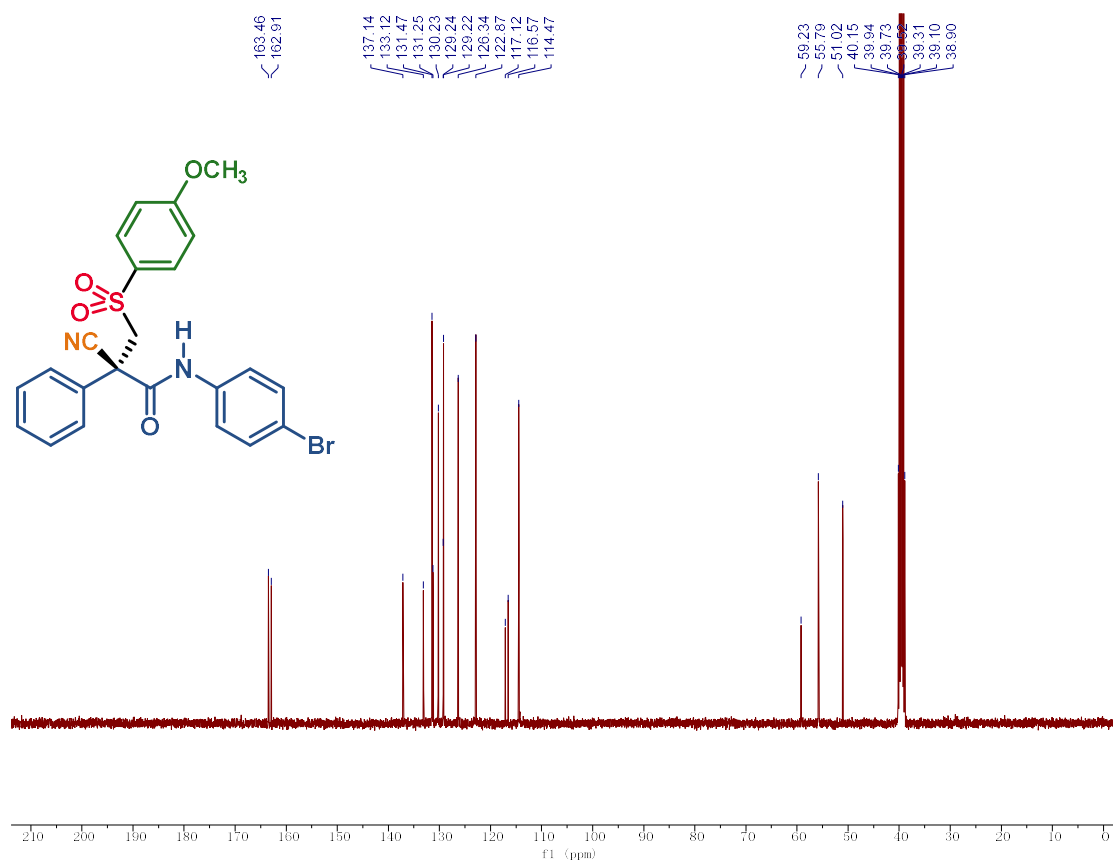

### NMR of Compound of 3aI

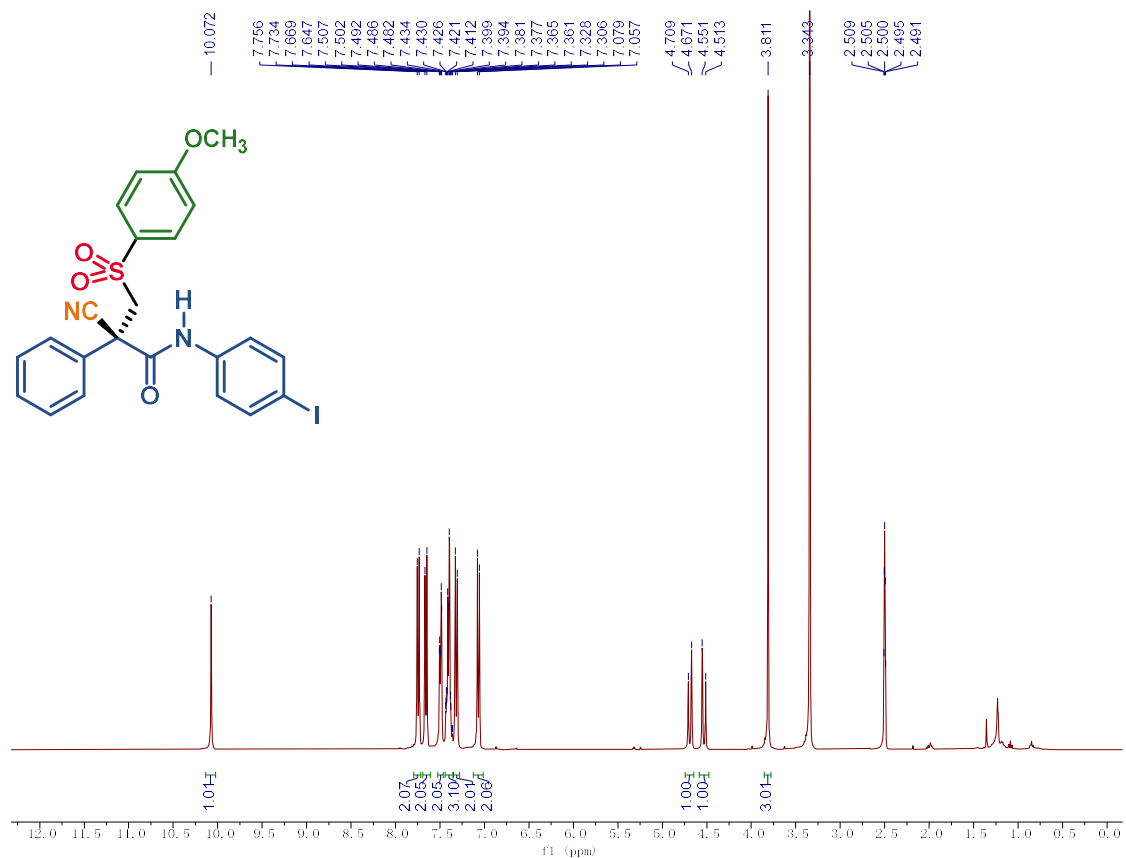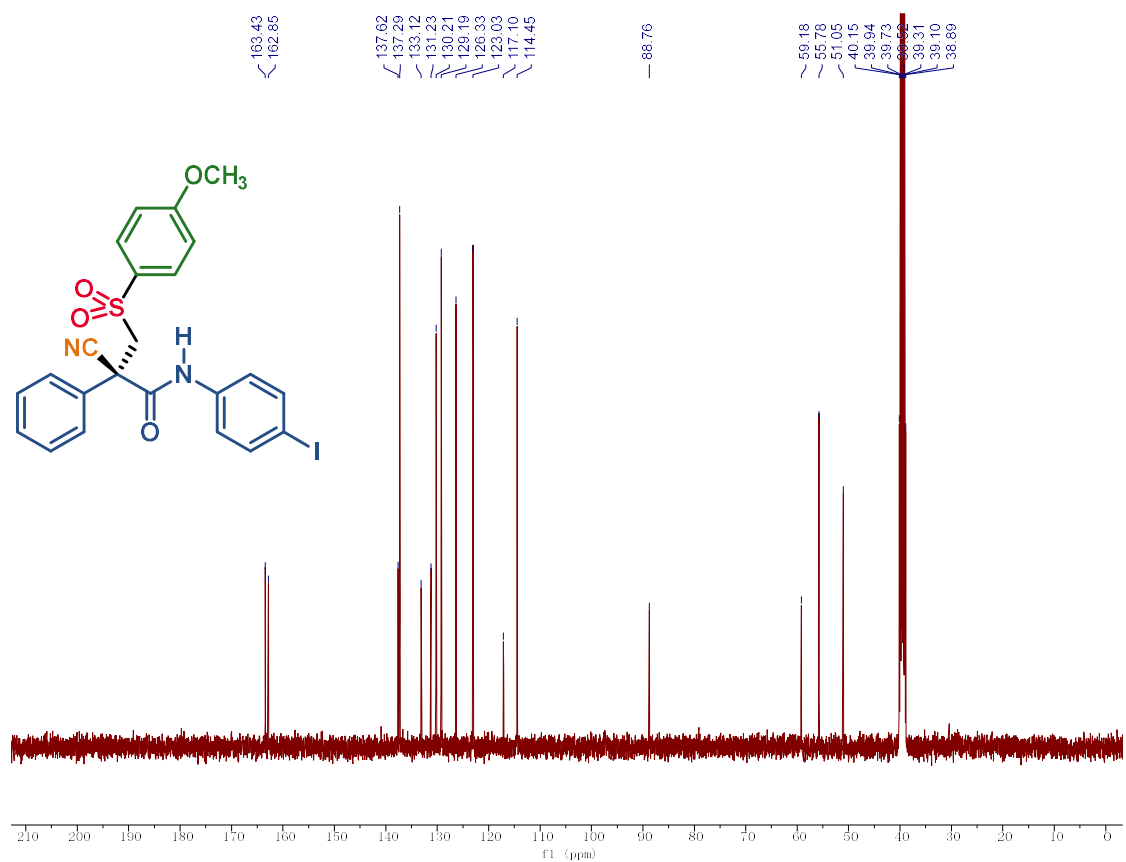

### NMR of Compound of 3am

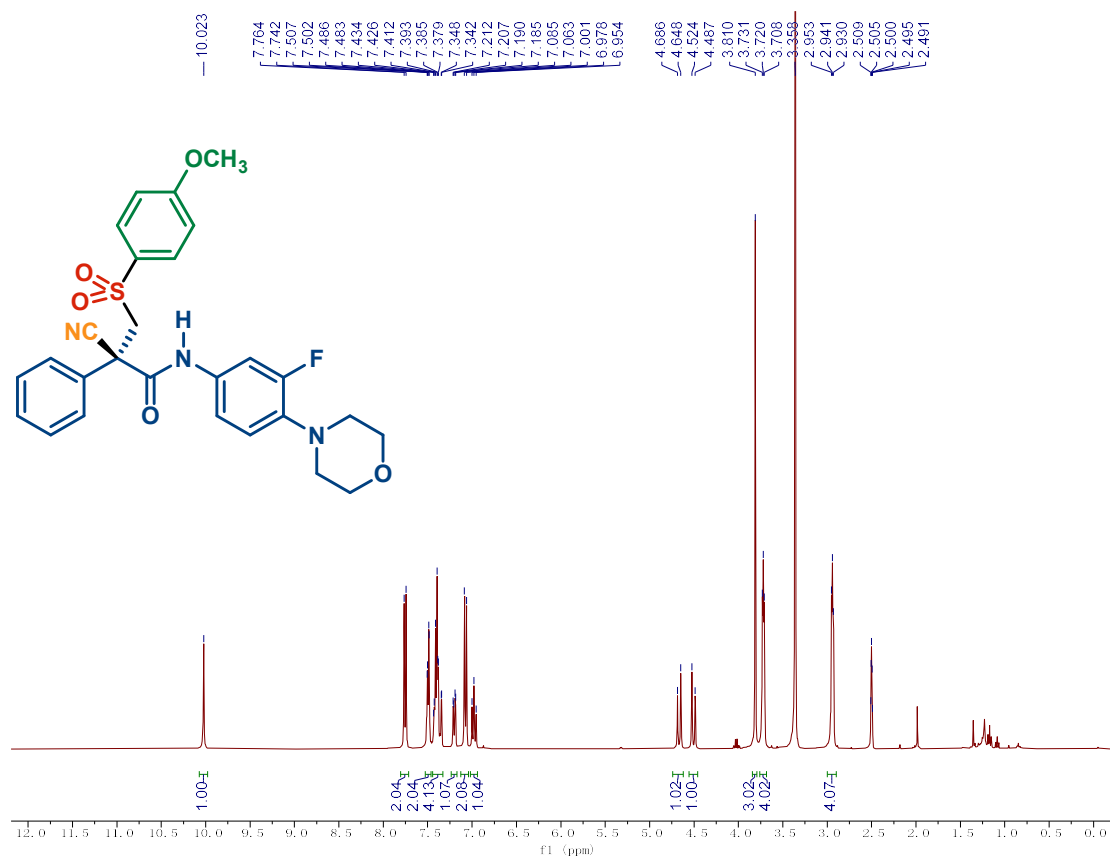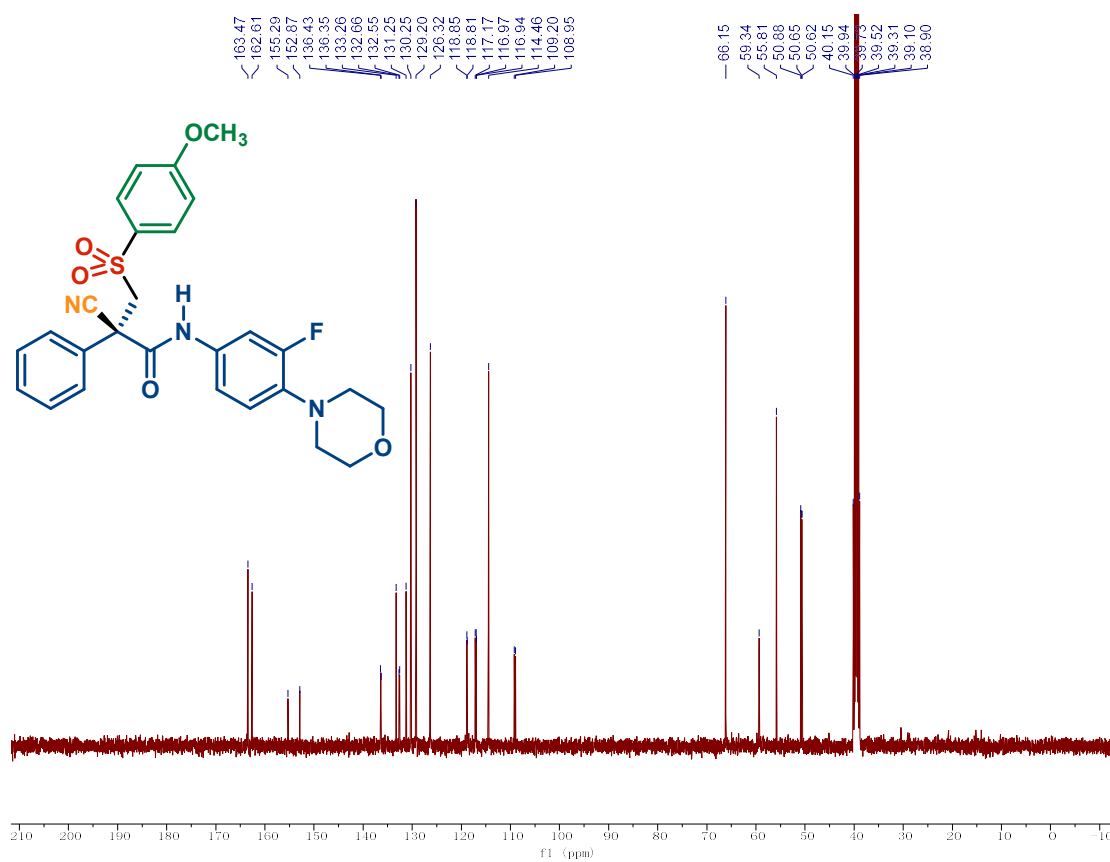

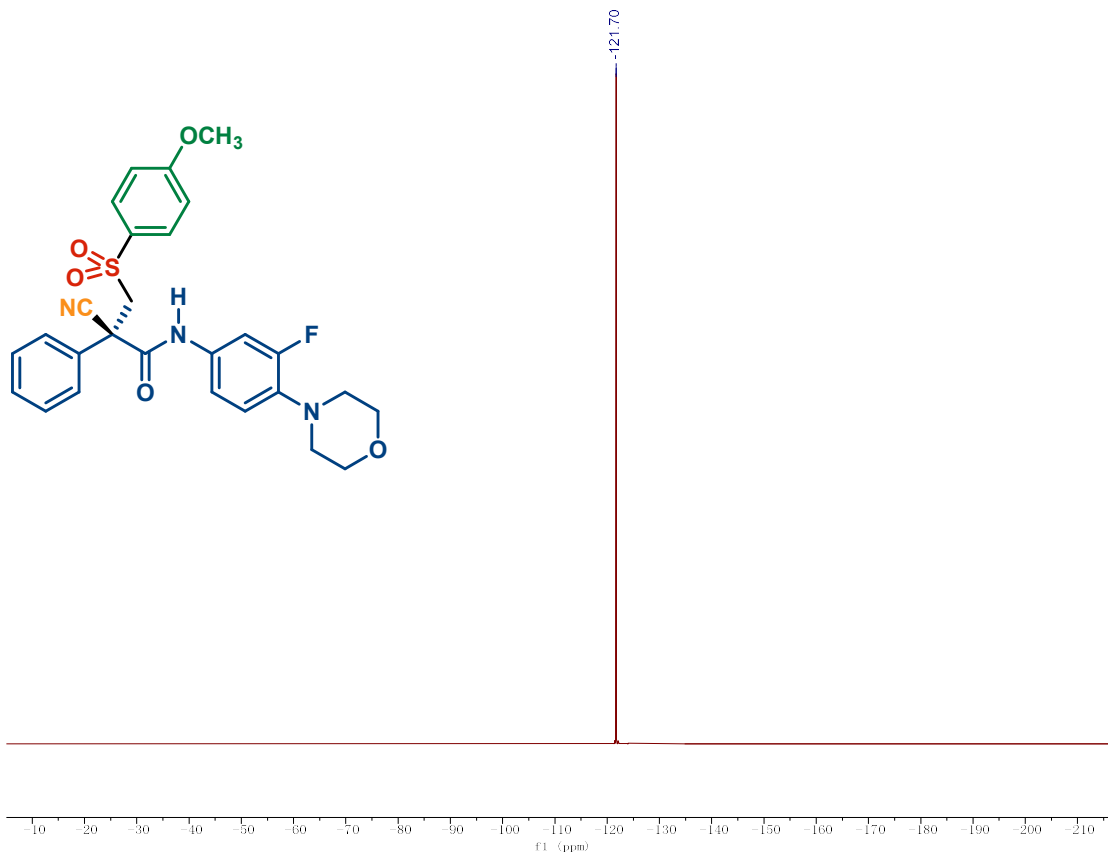

### NMR of Compound of 3a

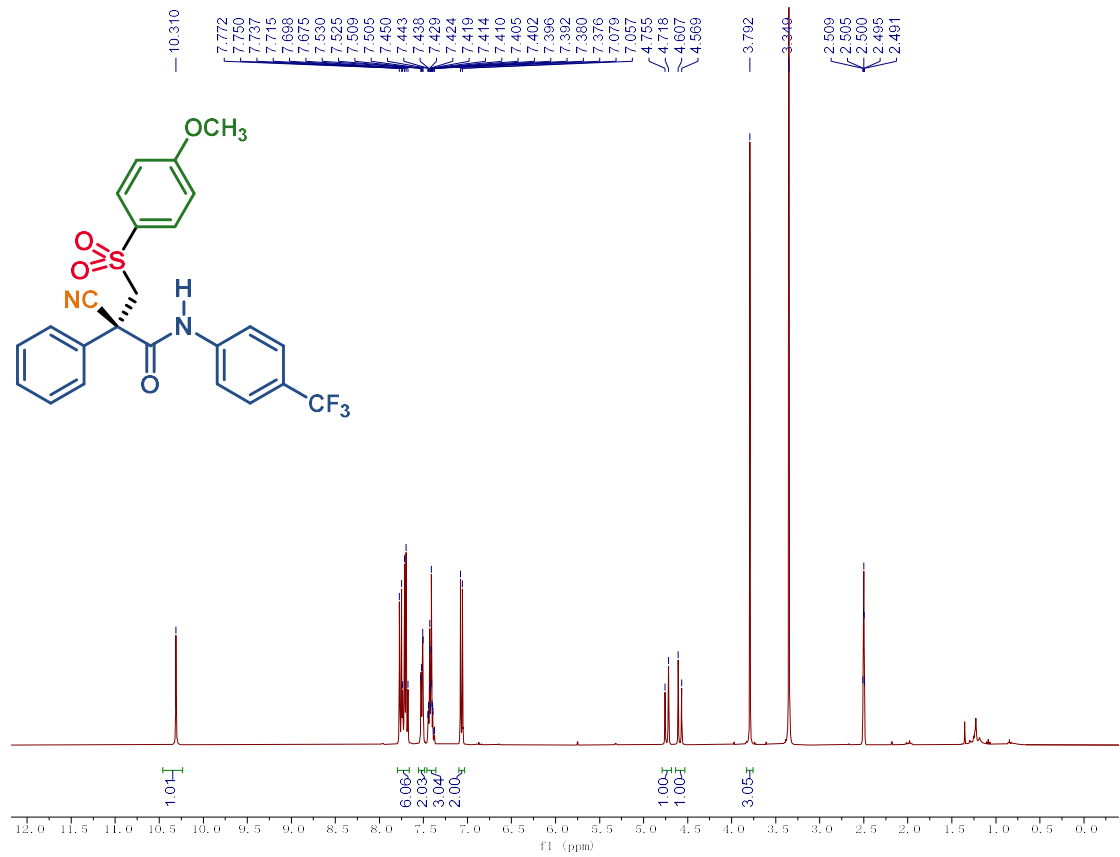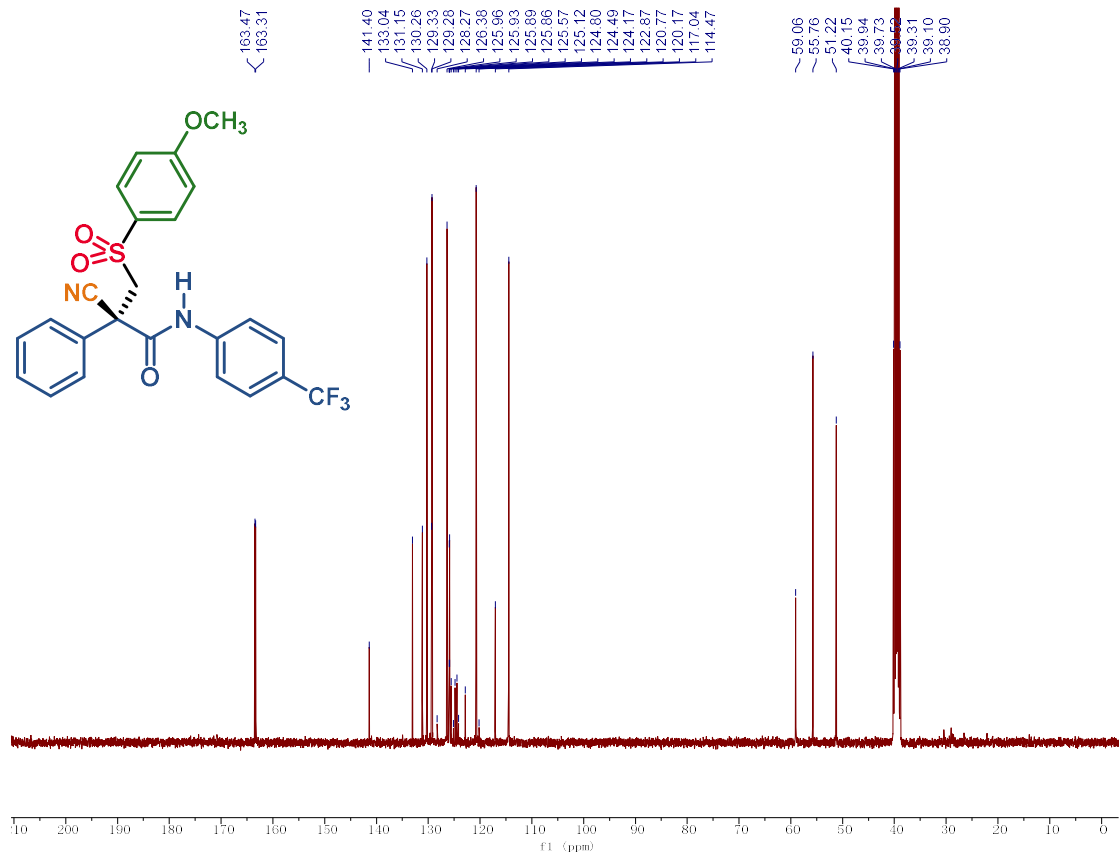

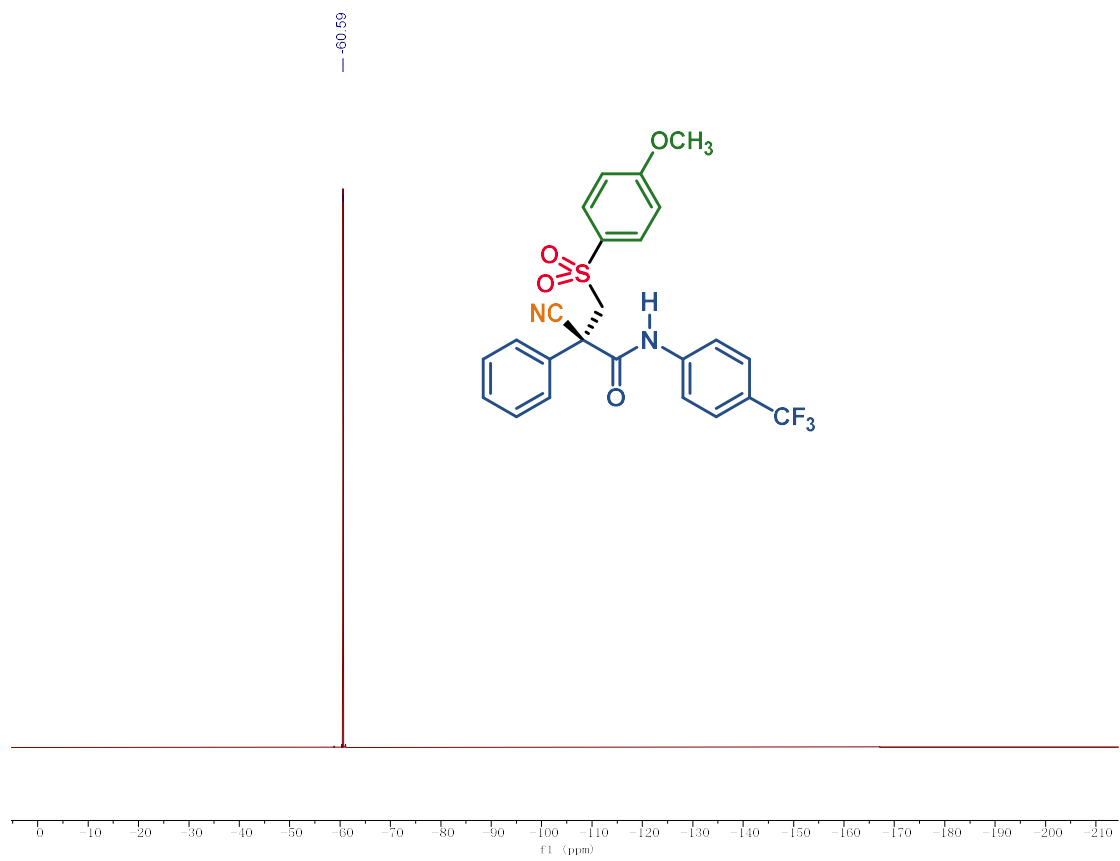

### NMR of Compound of 3ao

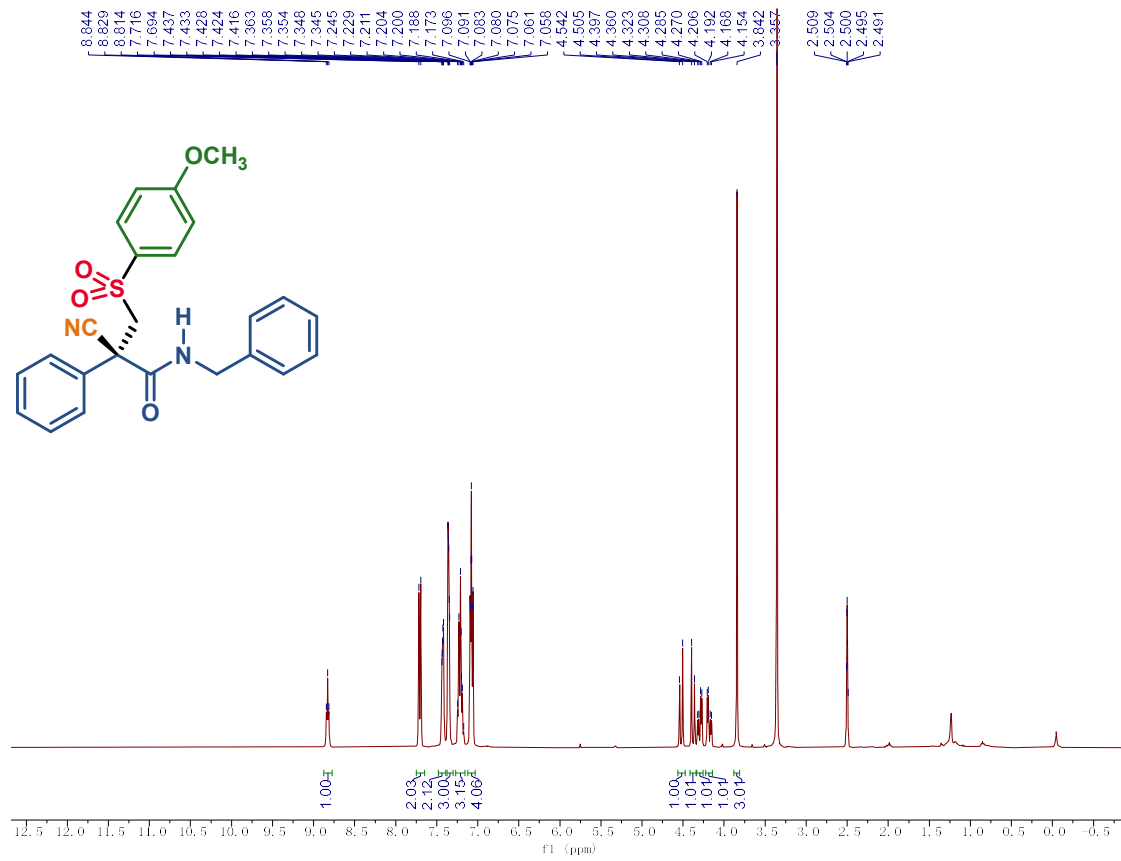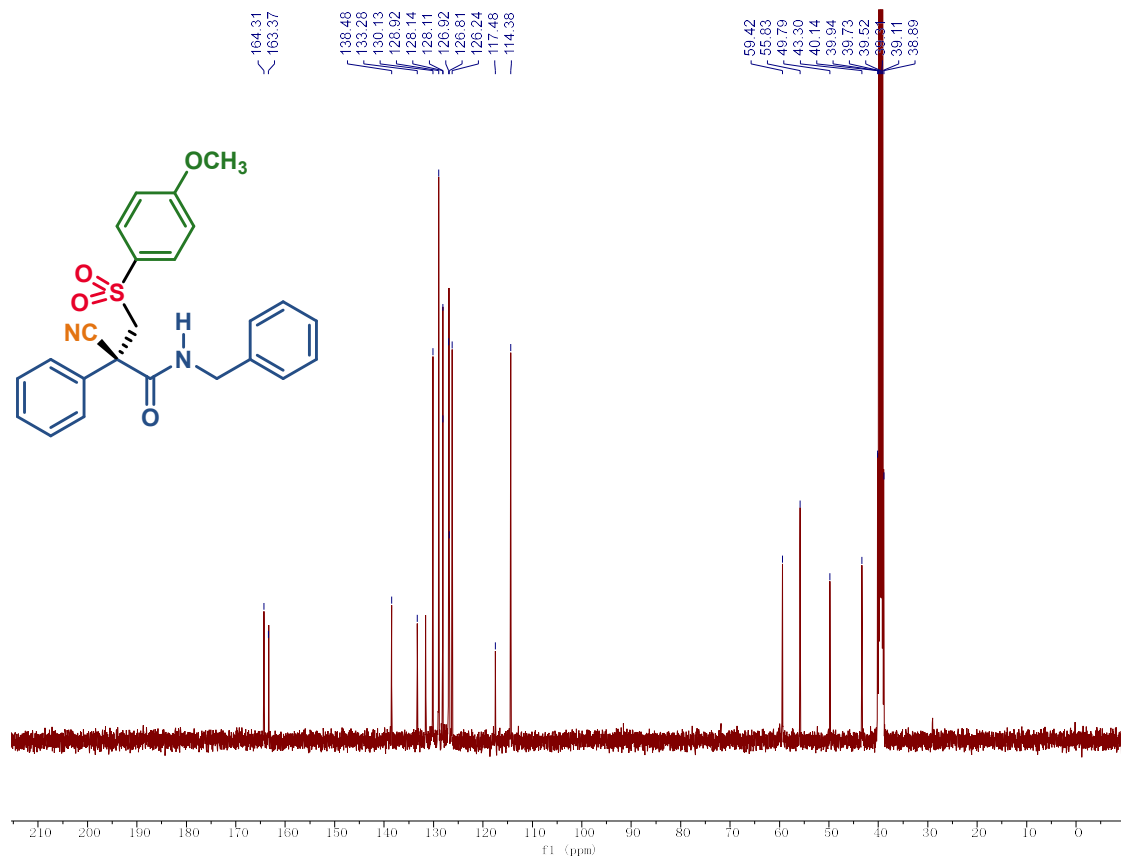



### NMR of Compound of 3ap

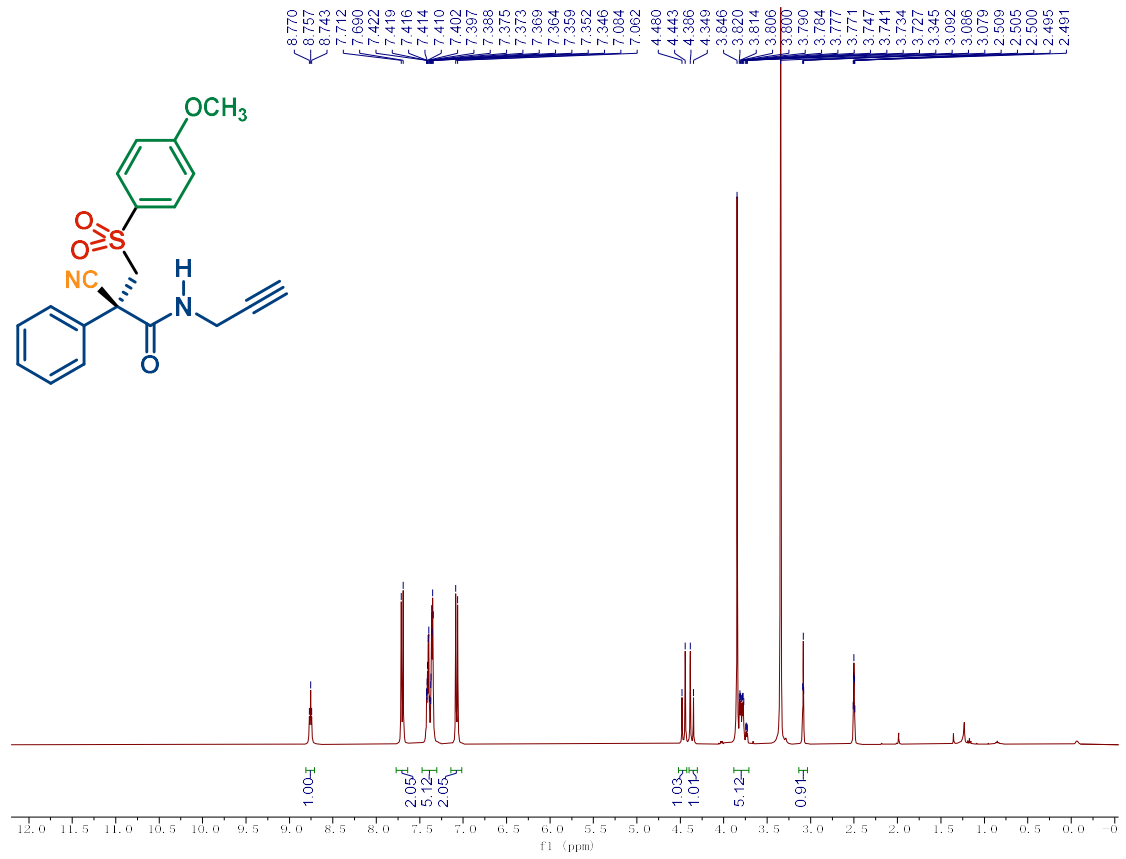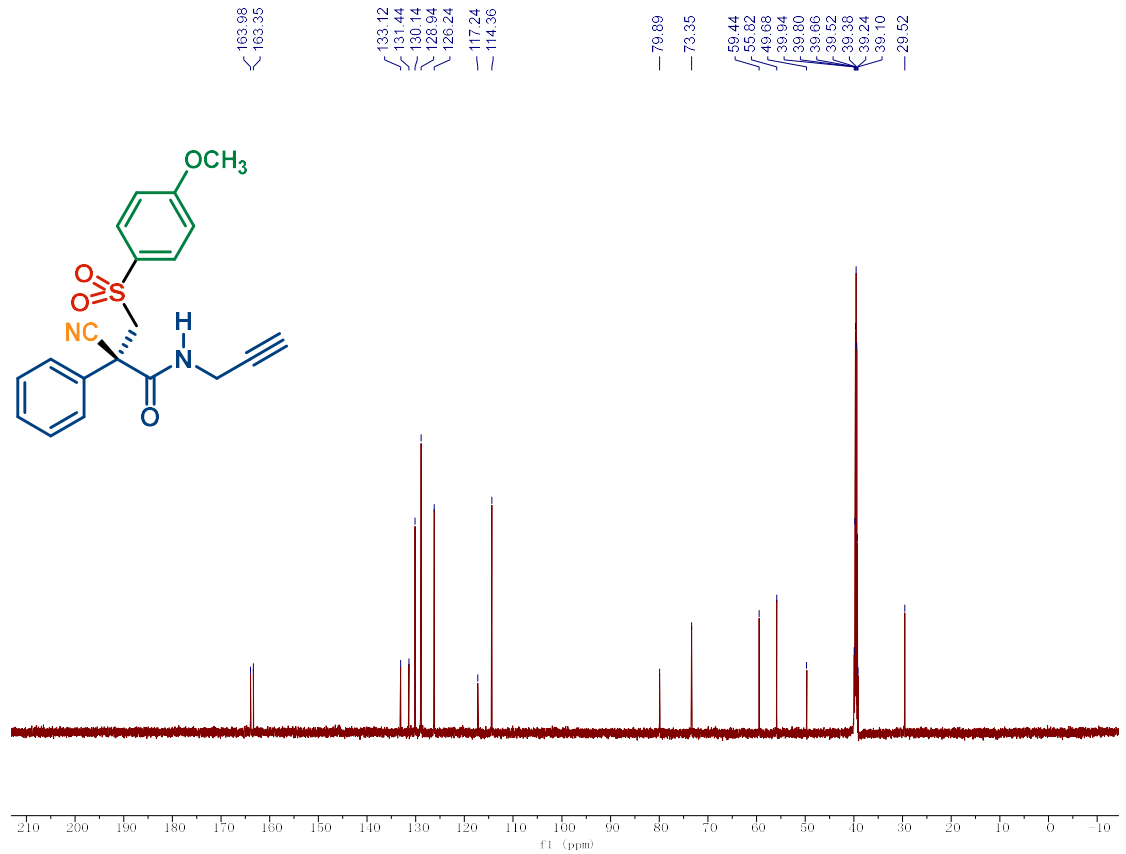

### NMR of Compound of 3aq

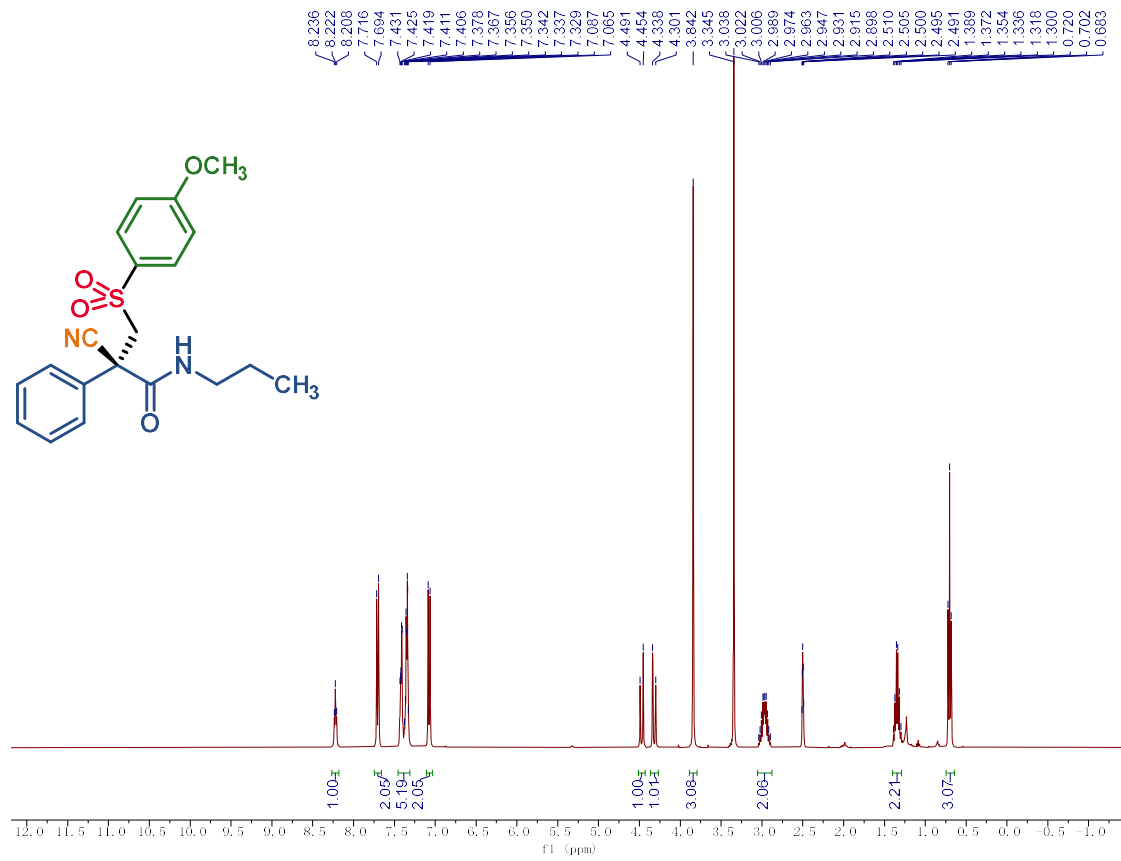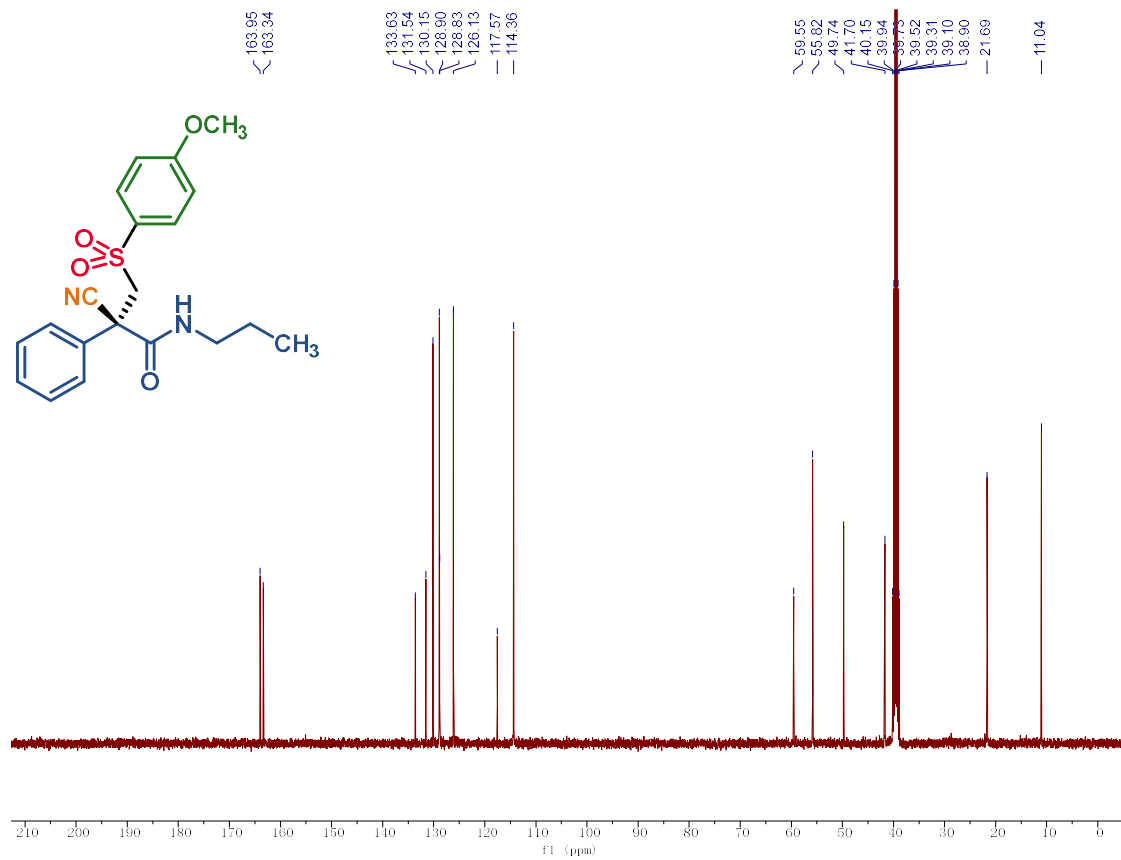

### NMR of Compound of 3ar

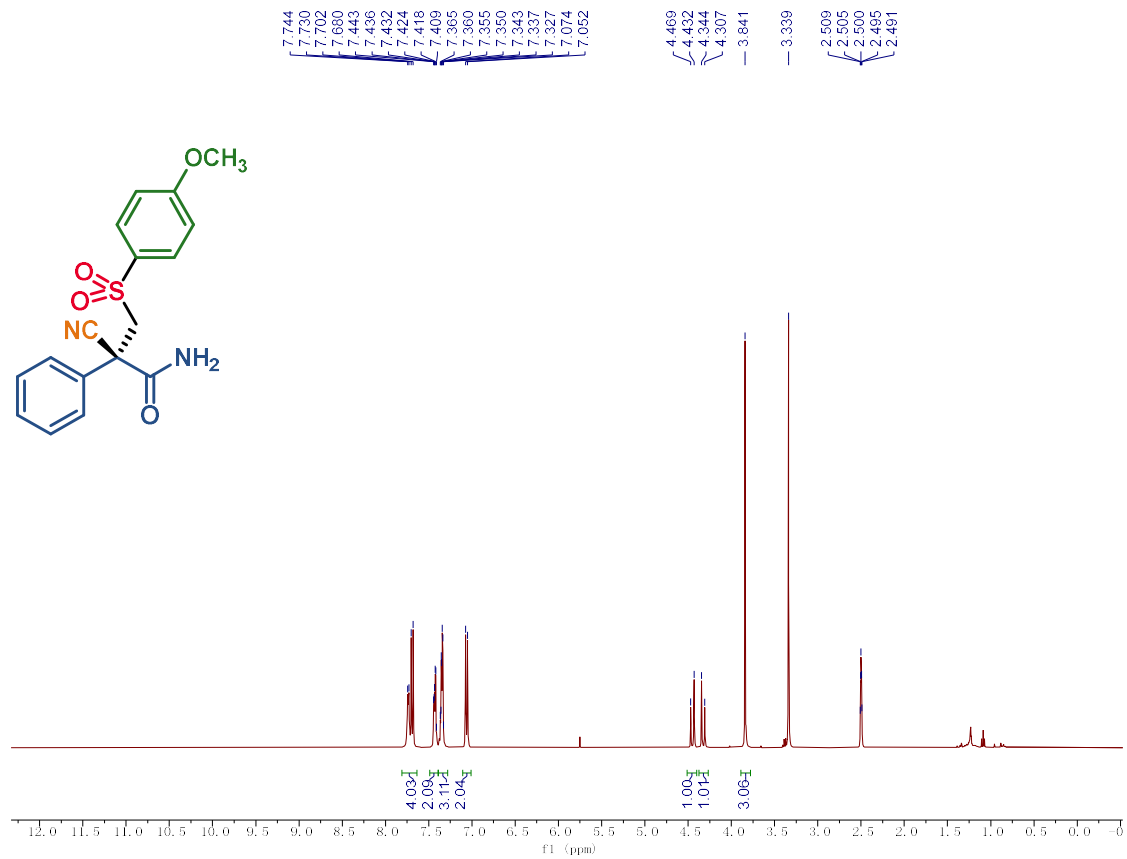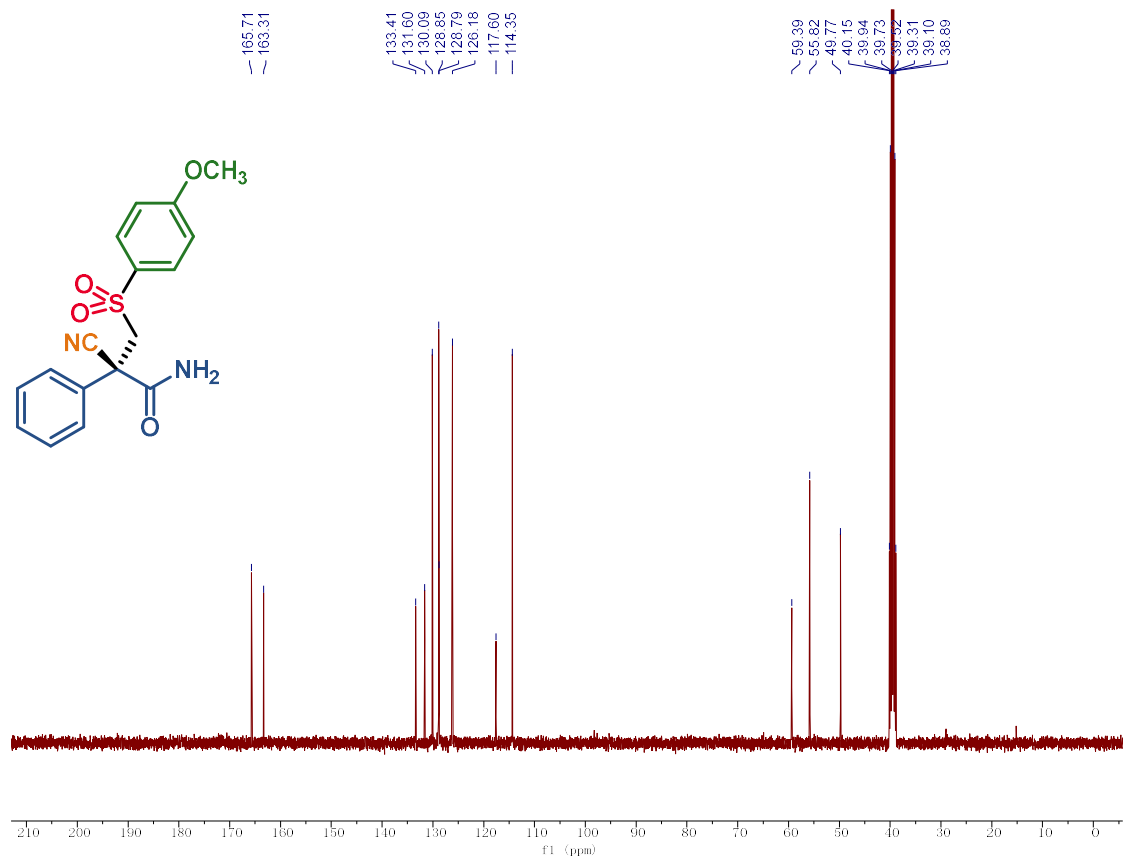

### NMR of Compound of 3as

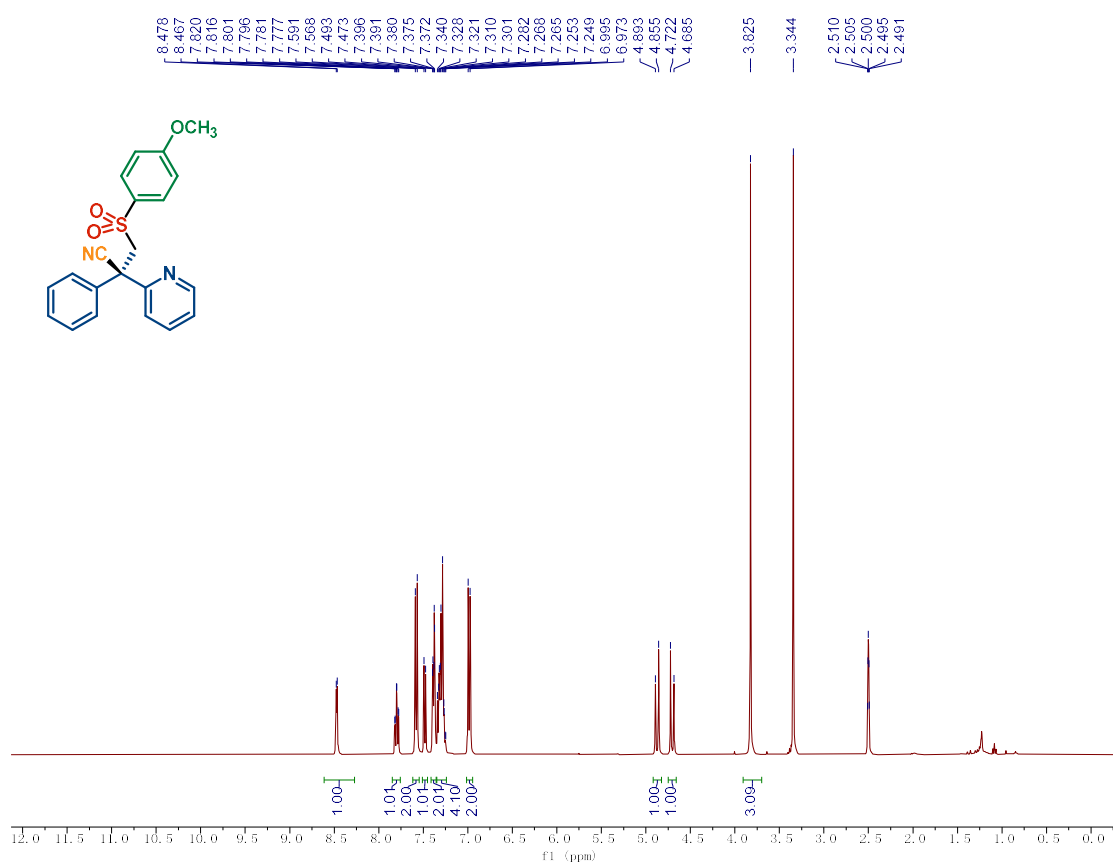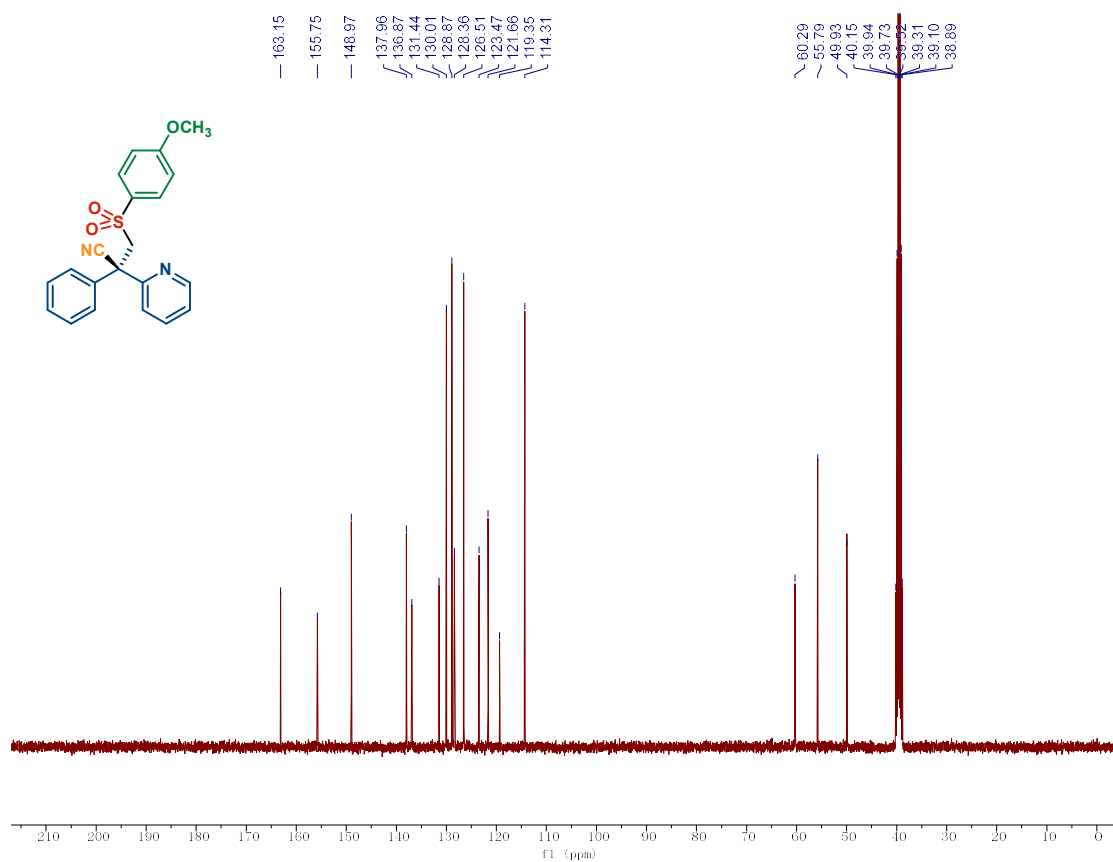

### NMR of Compound of 5a

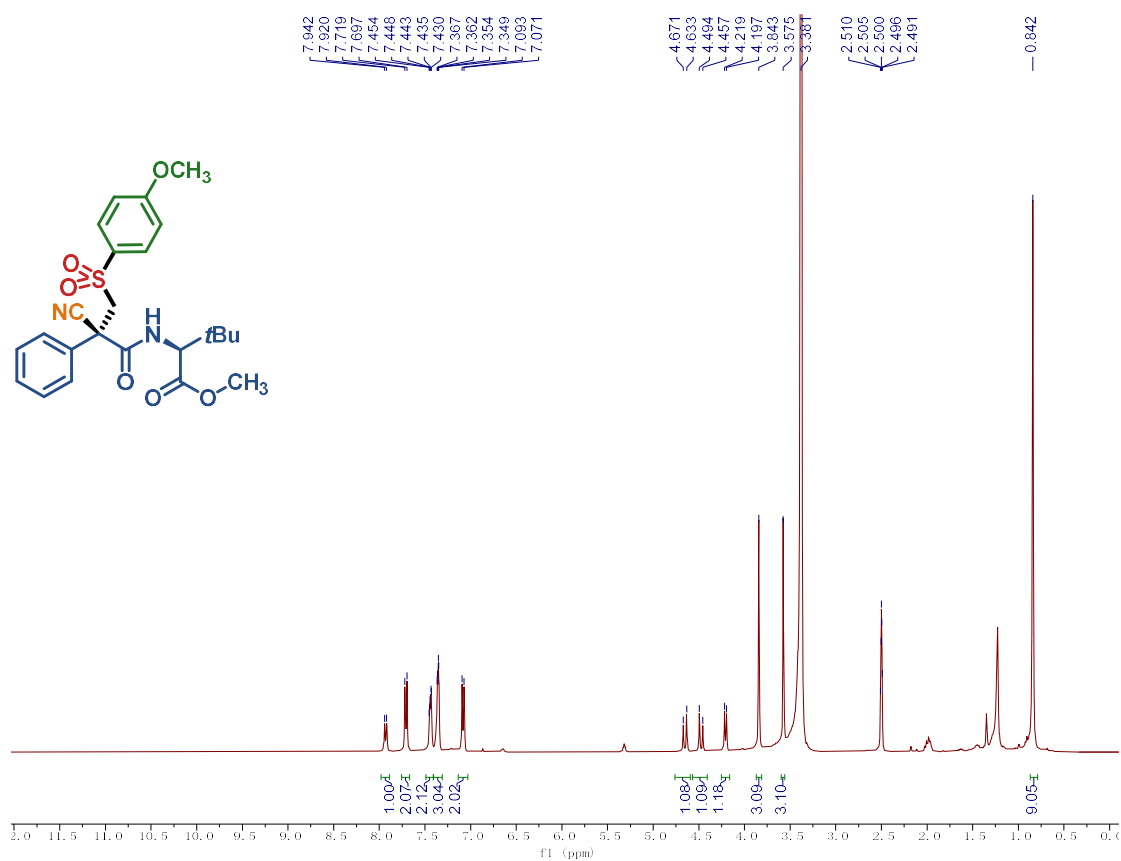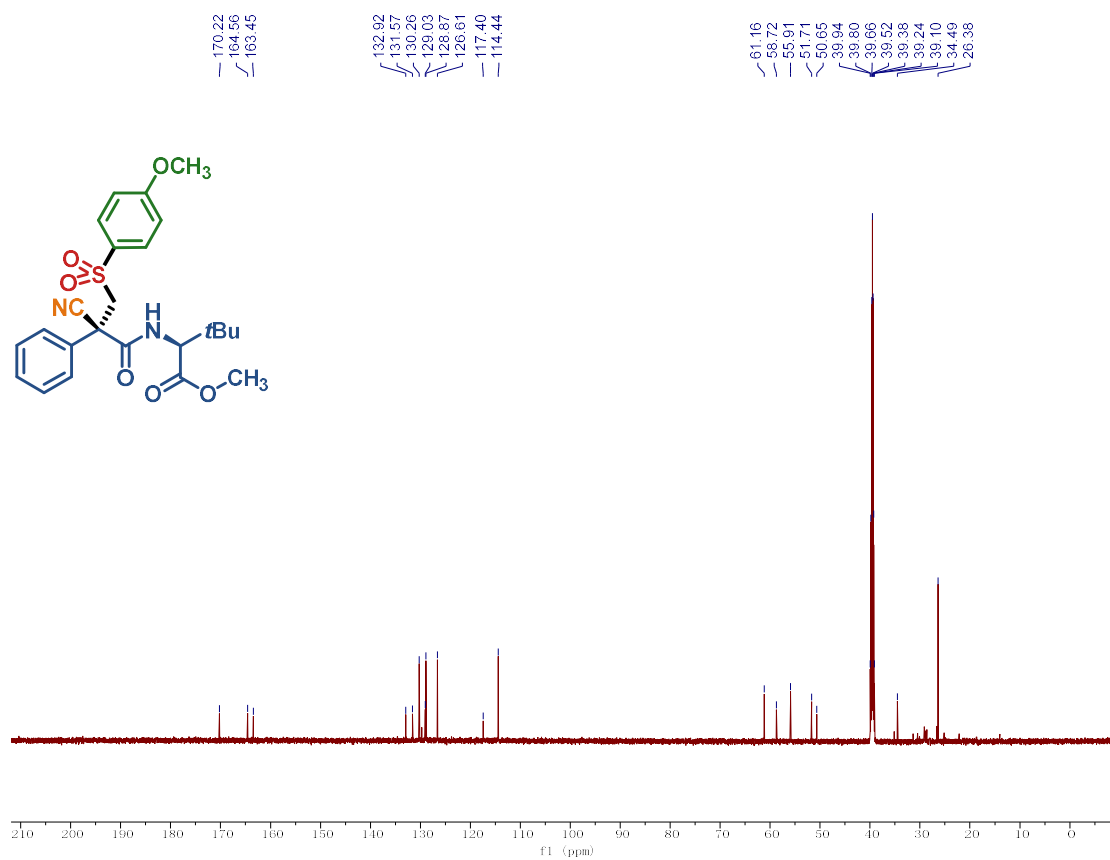

### NMR of Compound of 5b

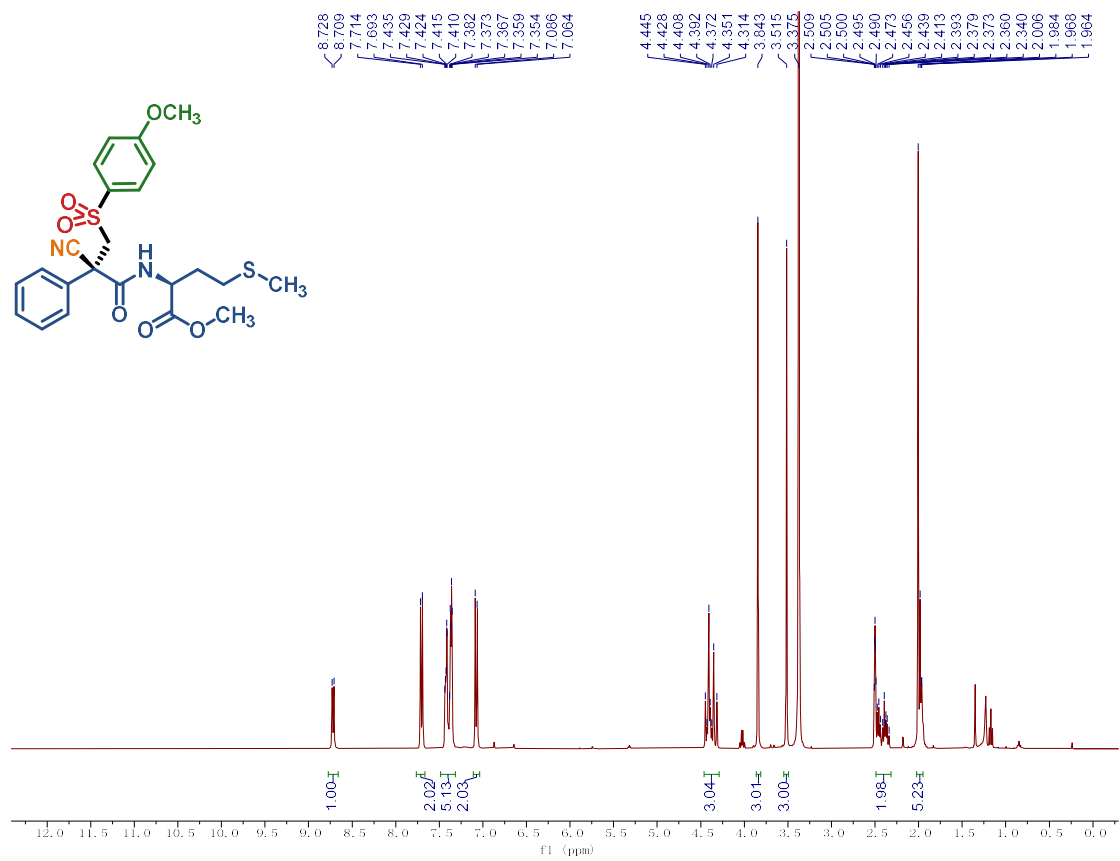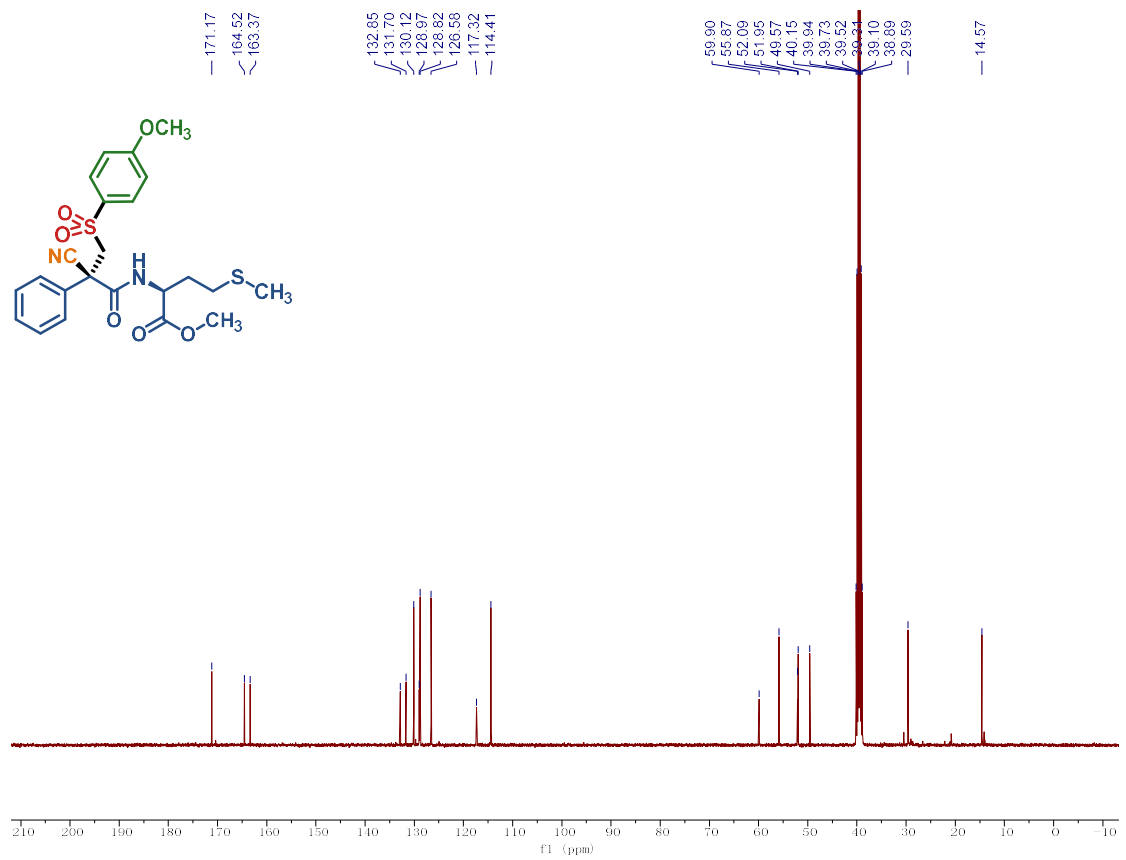

### NMR of Compound of 5c

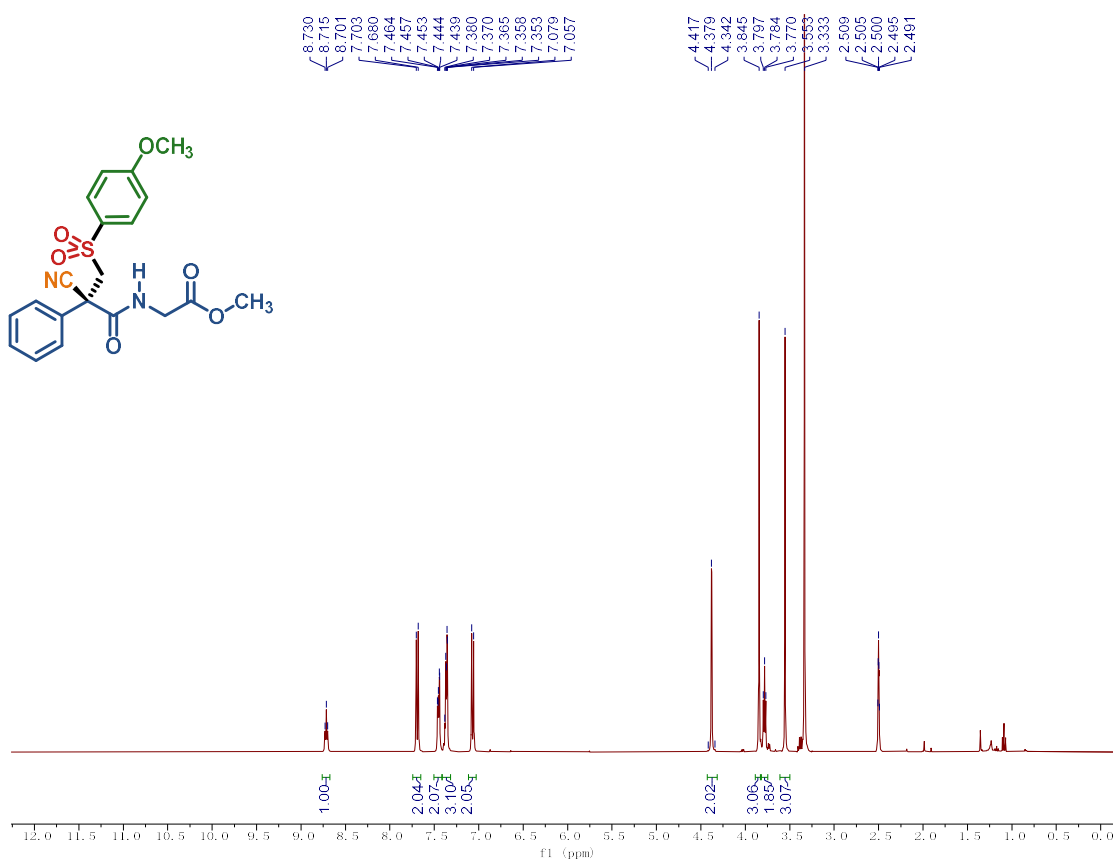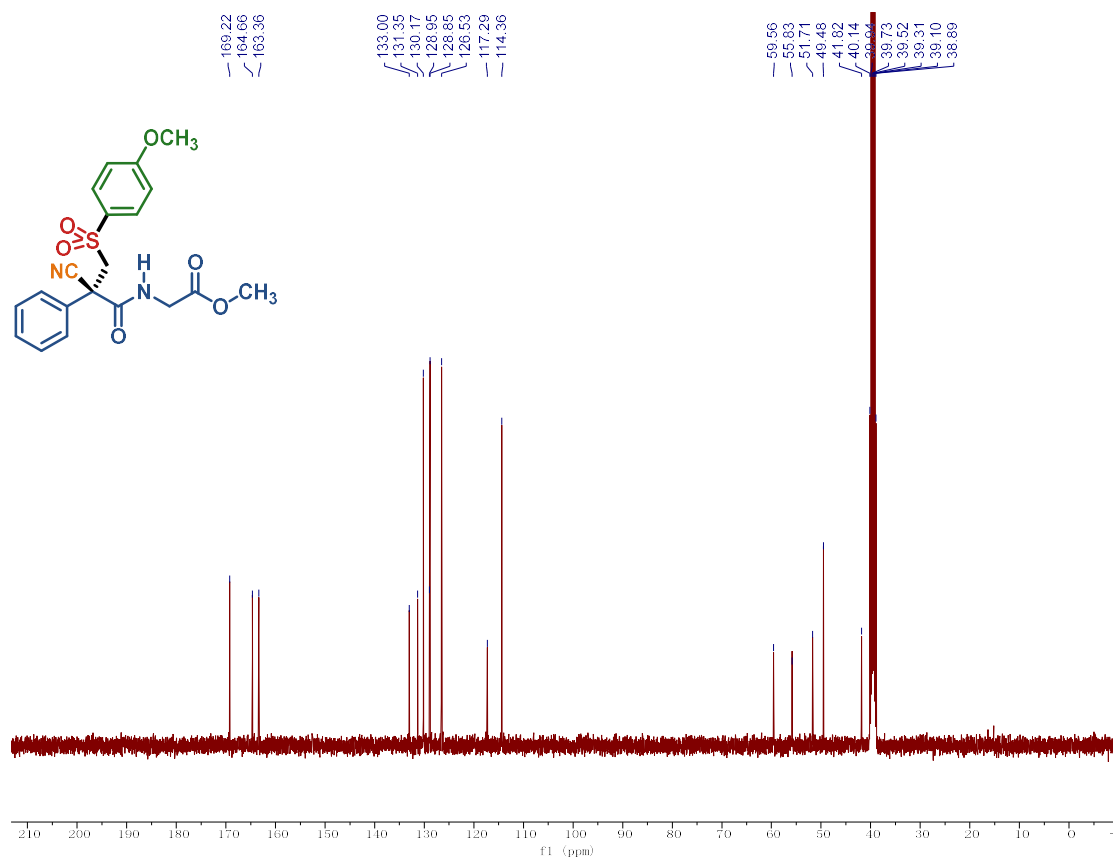

### NMR of Compound of 5d

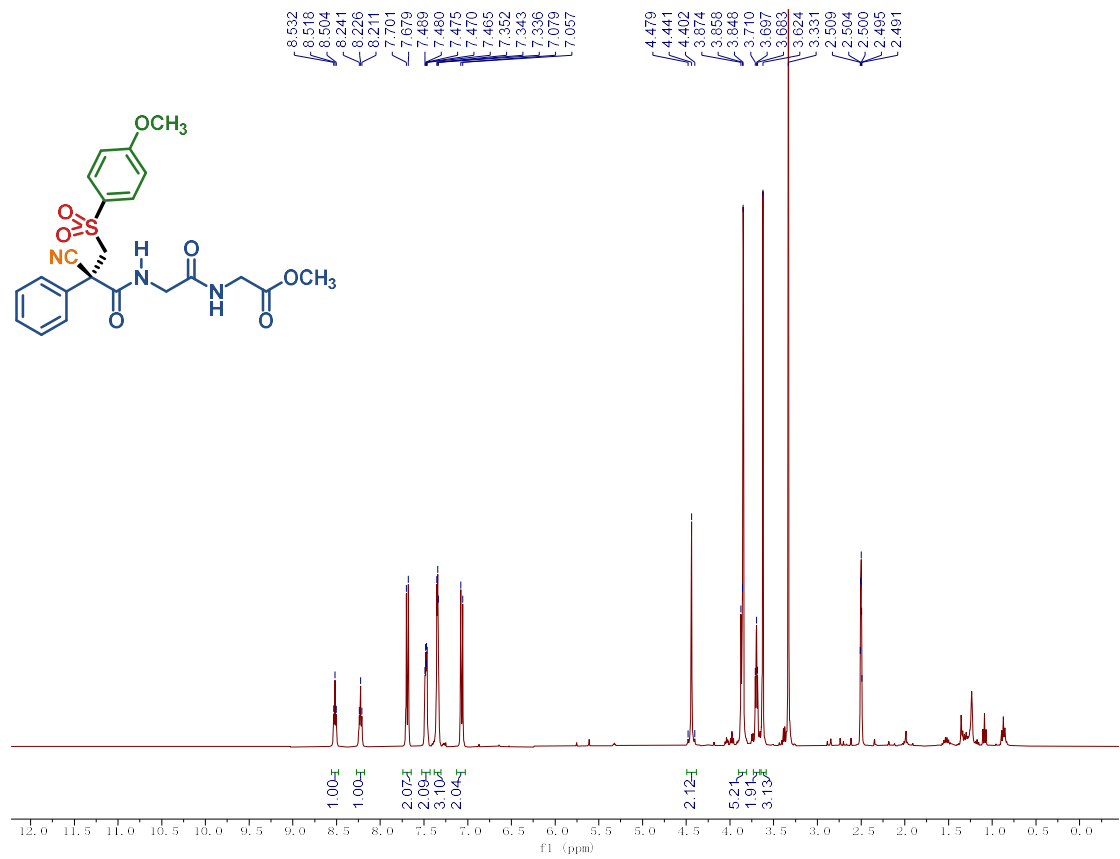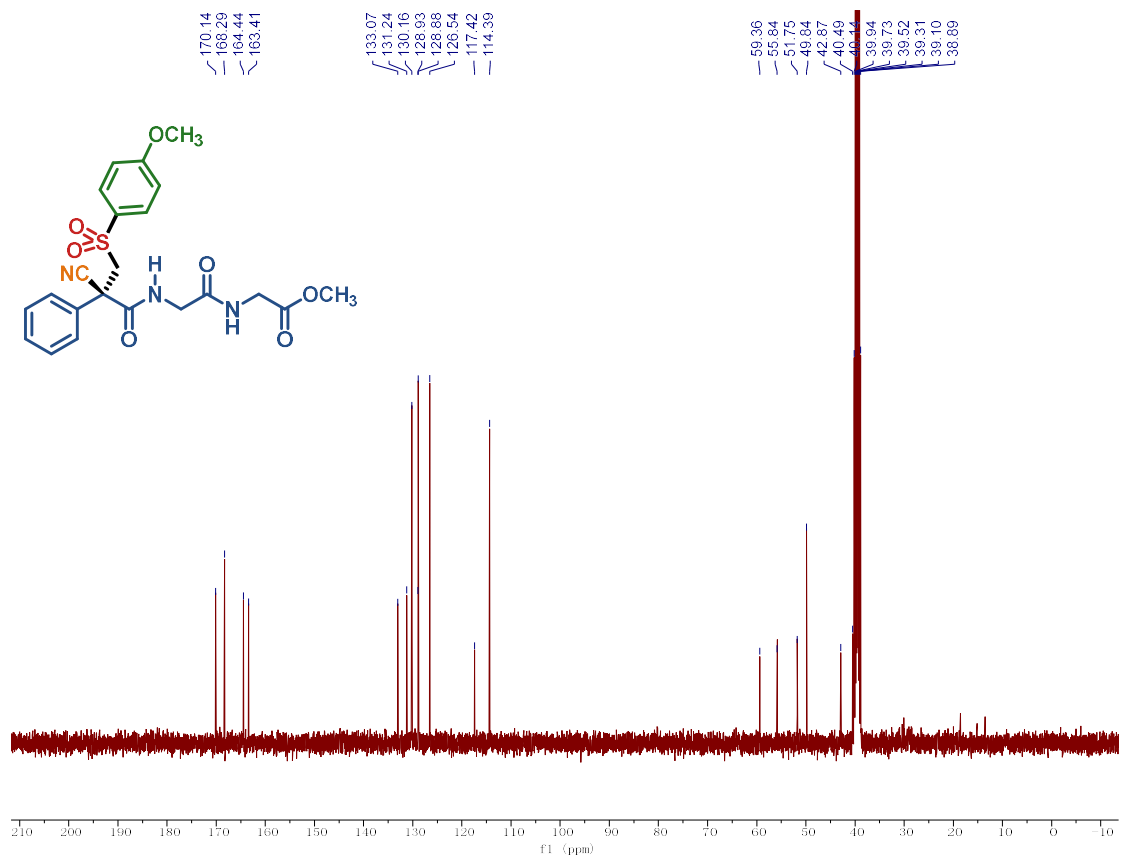



### NMR of Compound of 5e

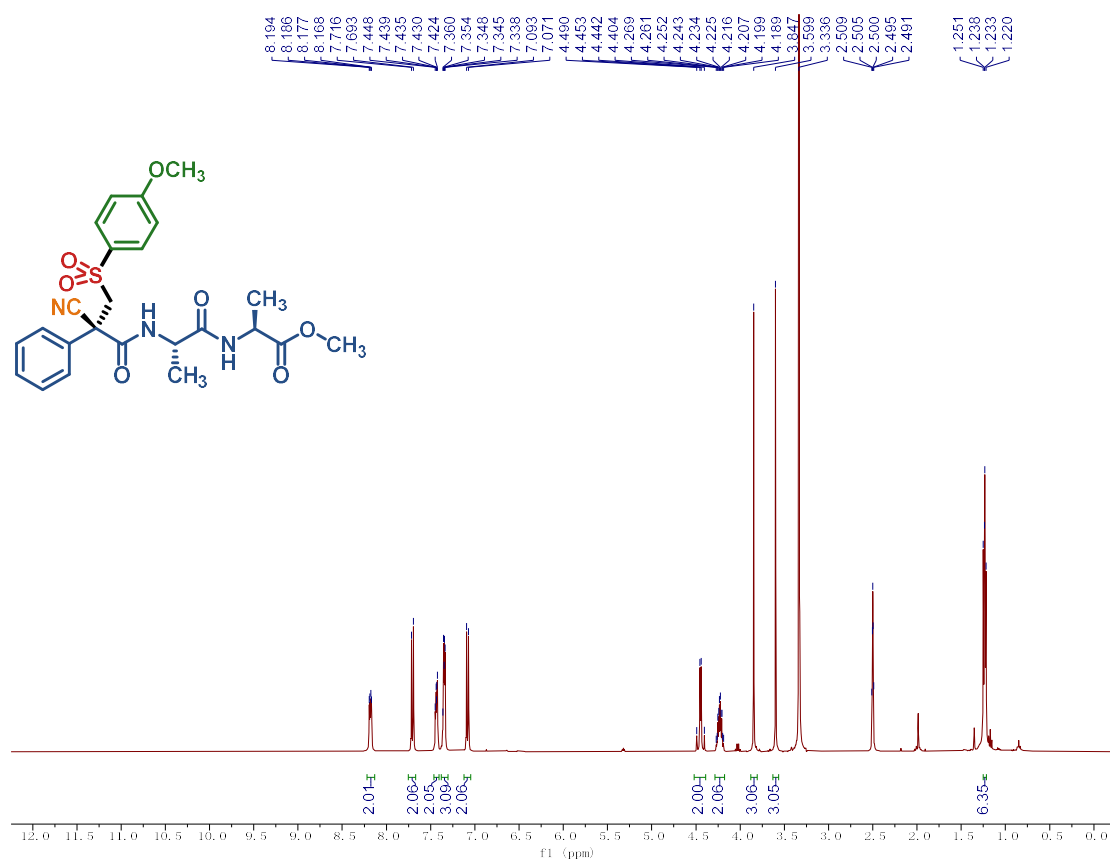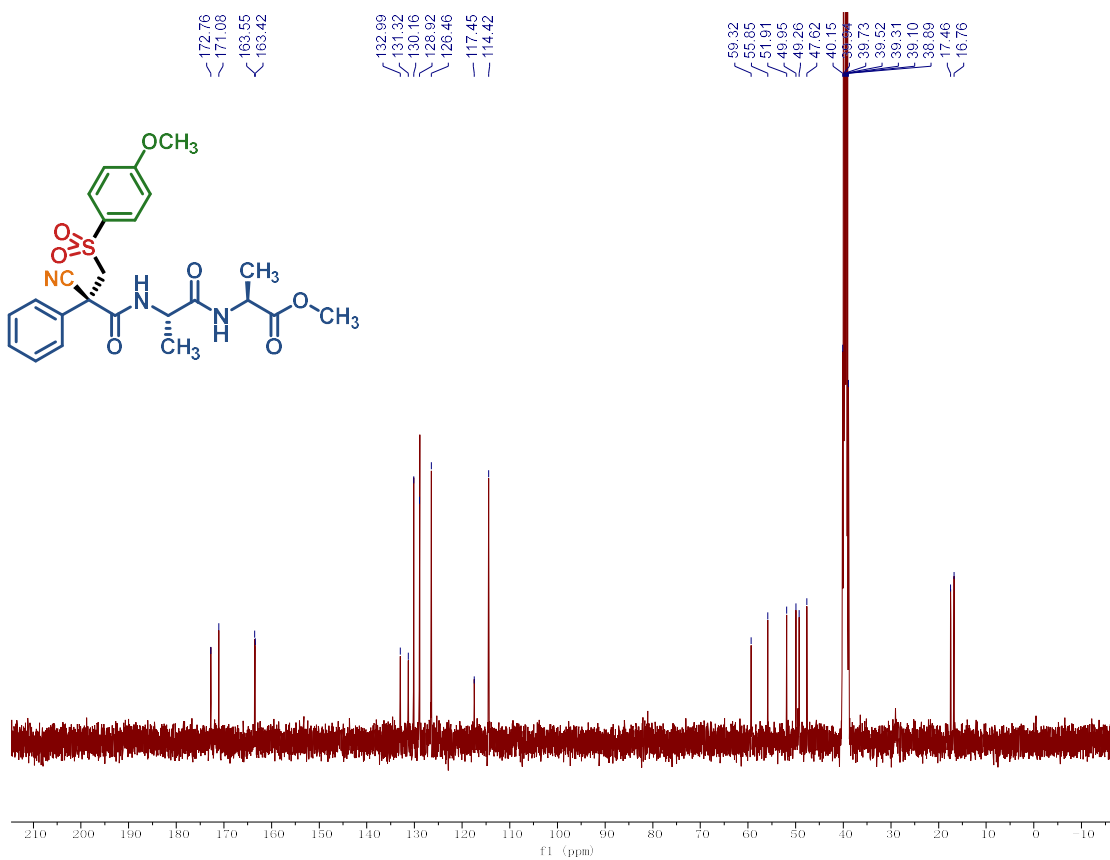

### NMR of Compound of 6

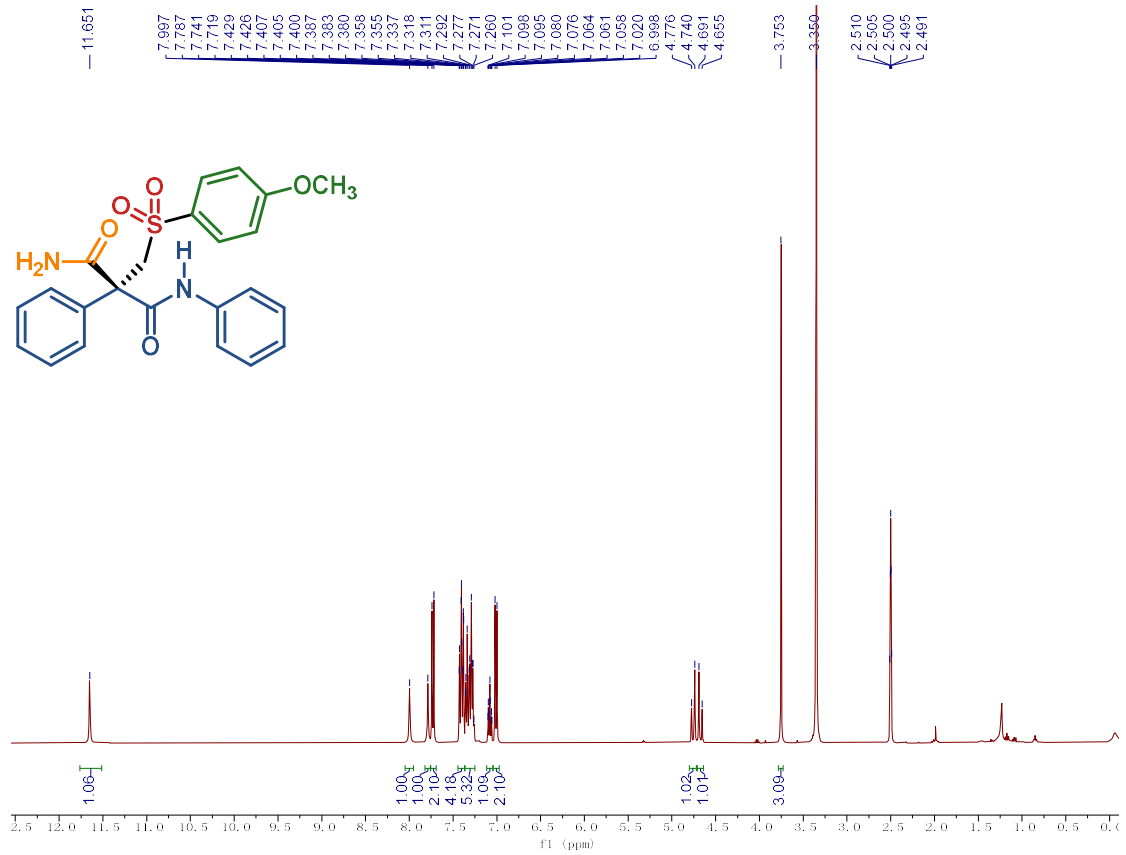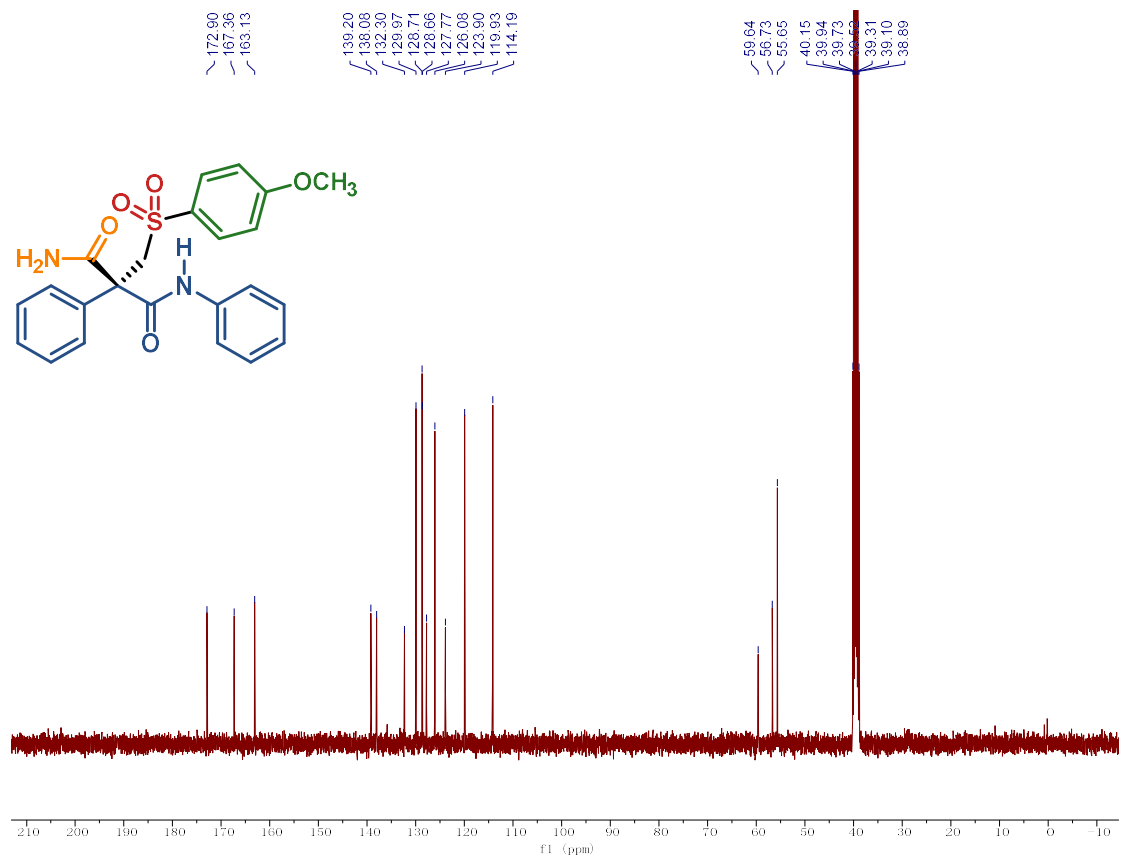

### NMR of Compound of 7

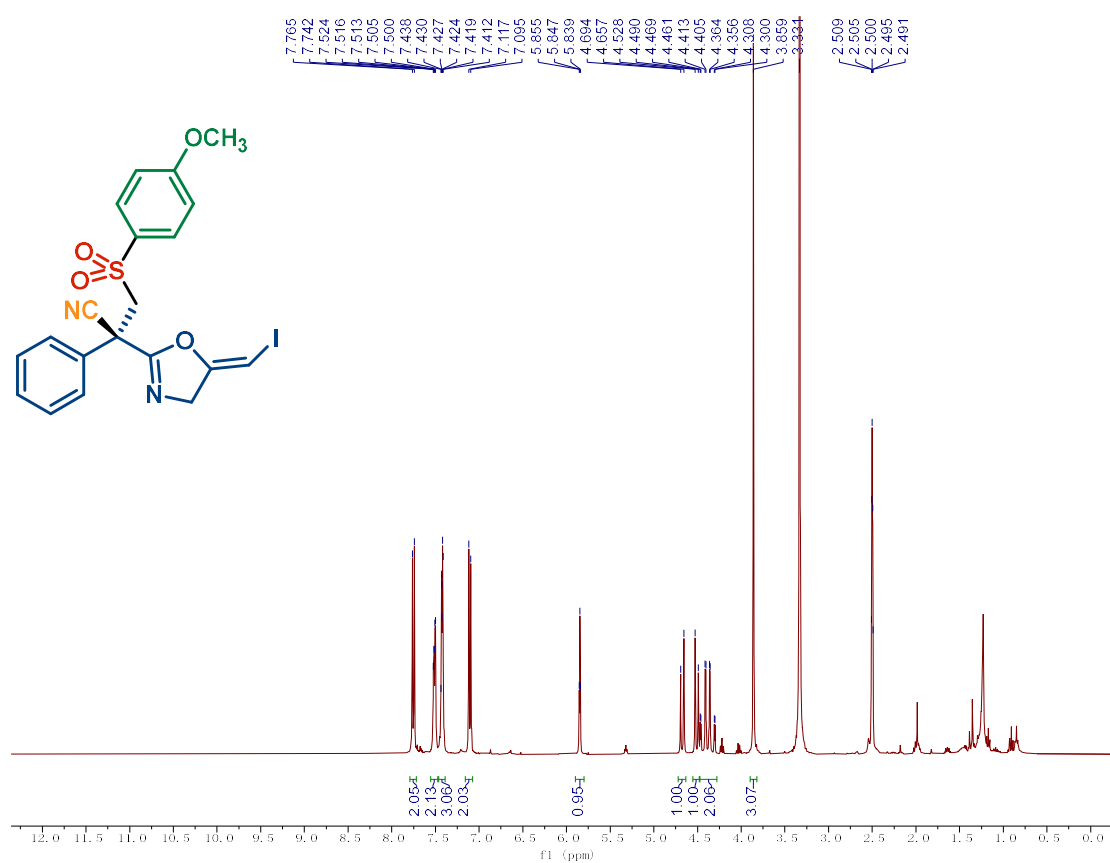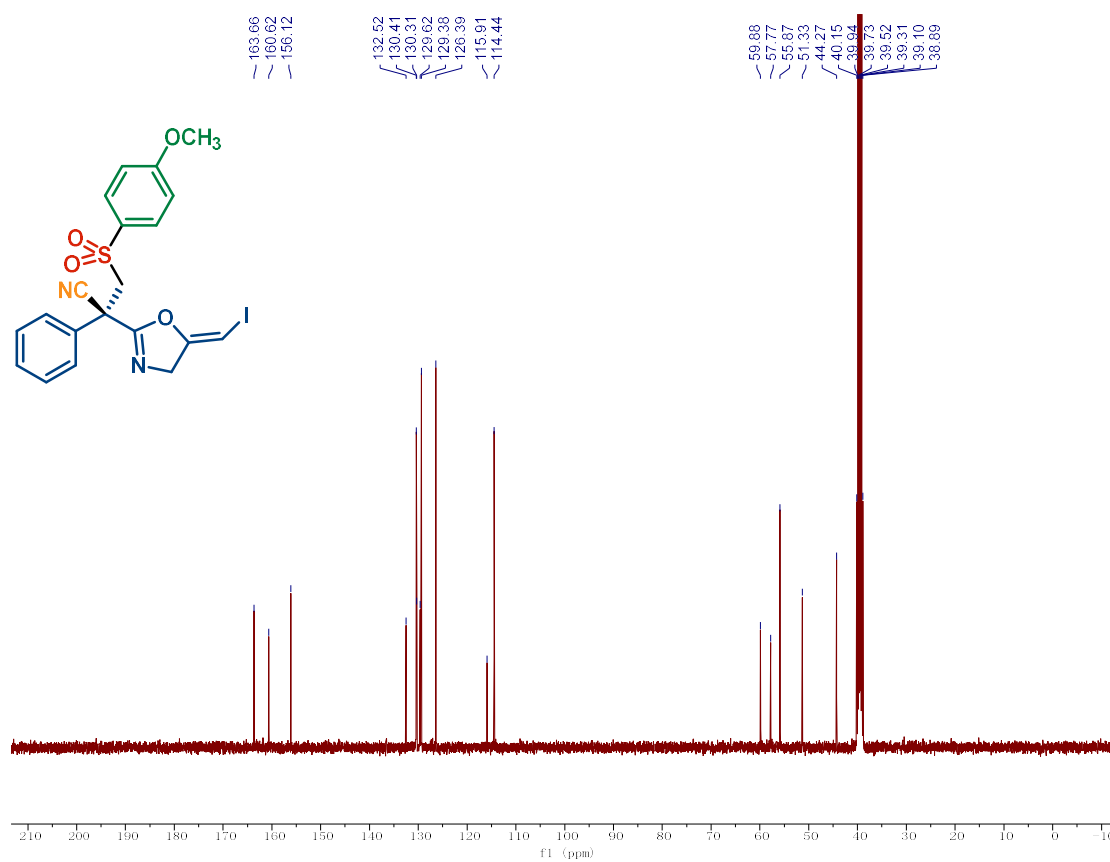

### NMR of Compound of 8

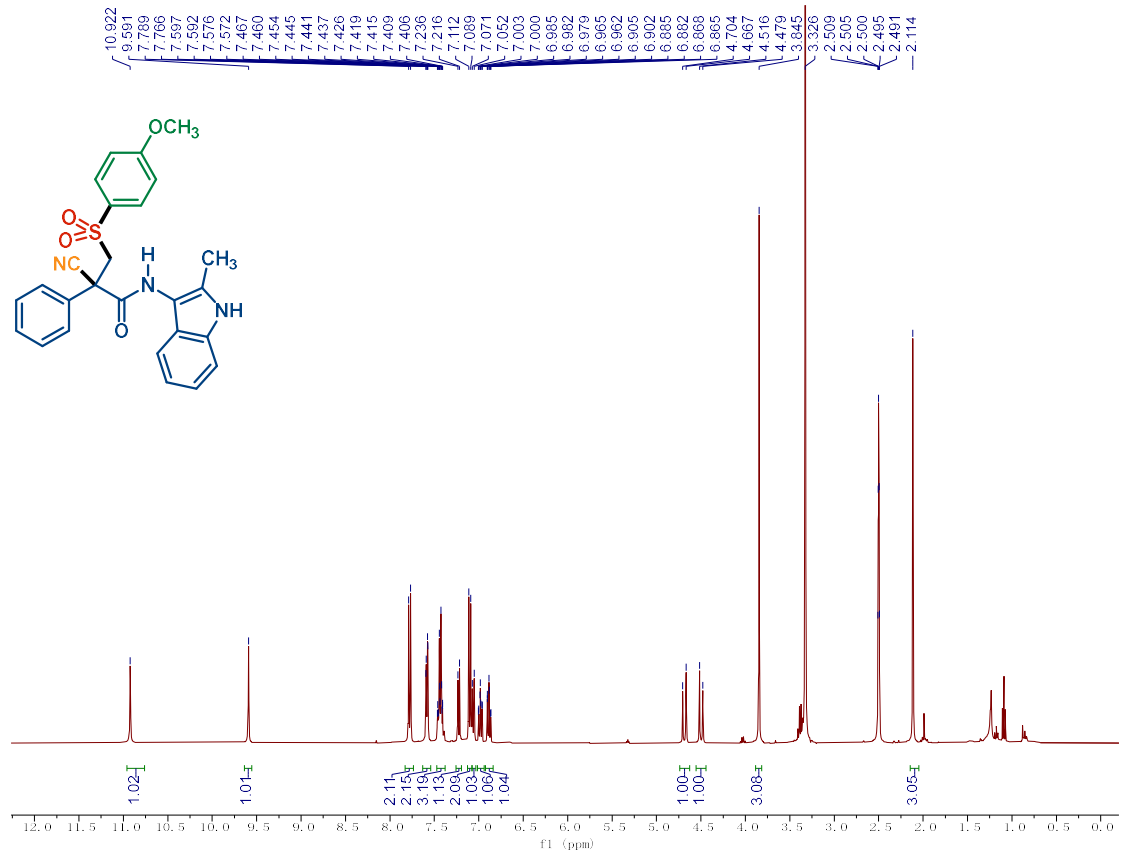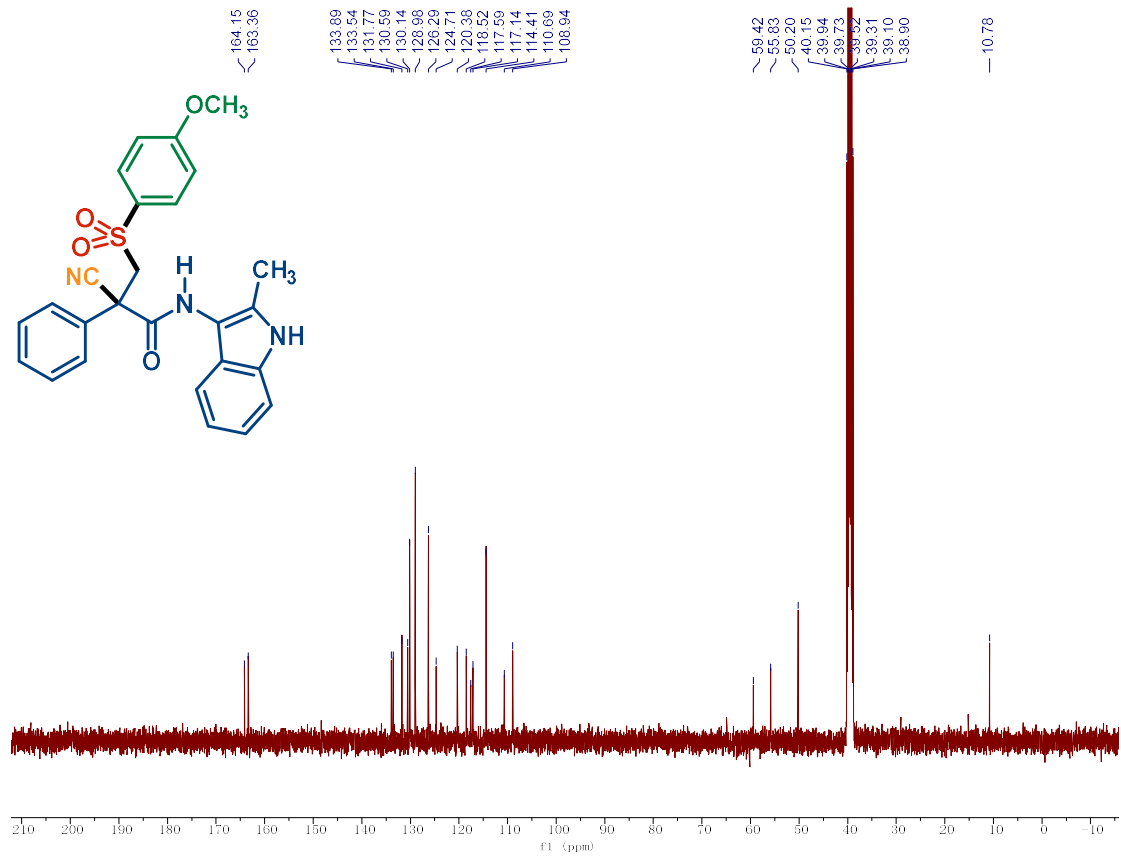

# NMR of Compound of 9

Desktop/LZ-240124/LZ-LLP2-252-7\_proton-1-1.jdf

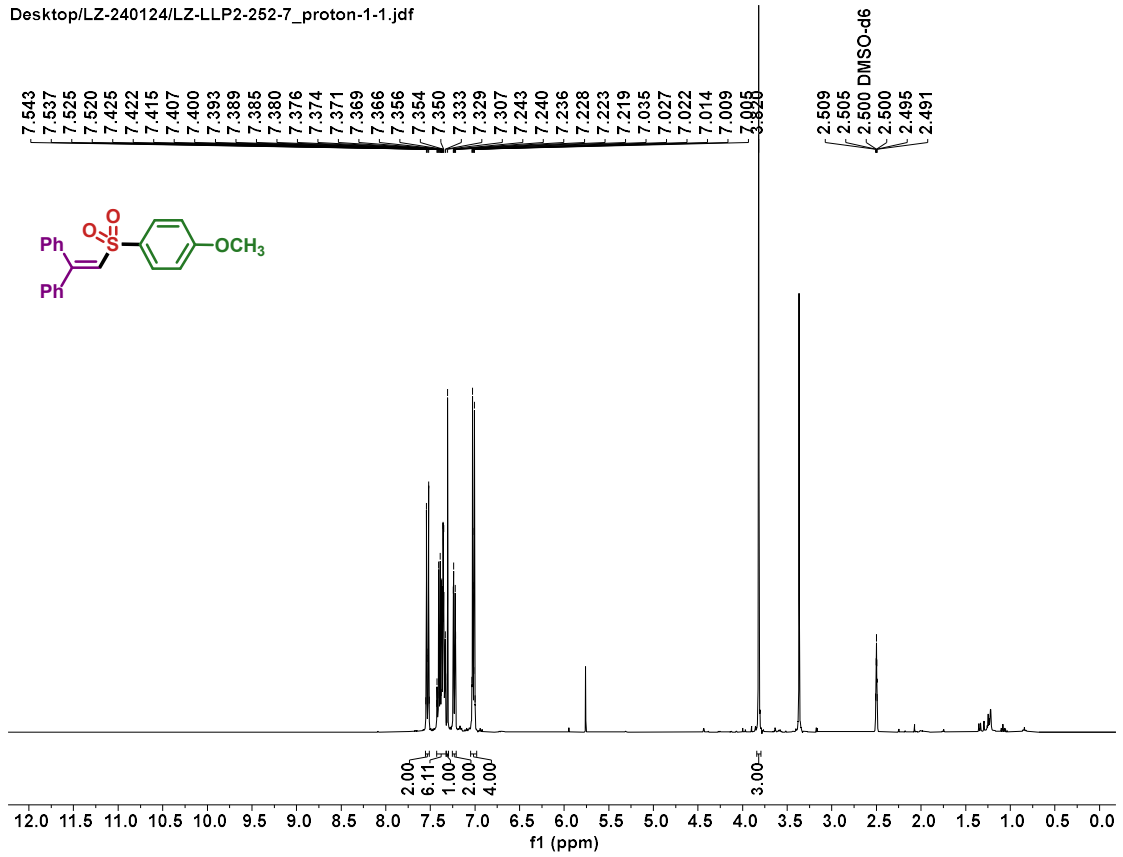

Desktop/LZ-240124/LZ-LLP2-252-7\_carbon-1-1.jdf

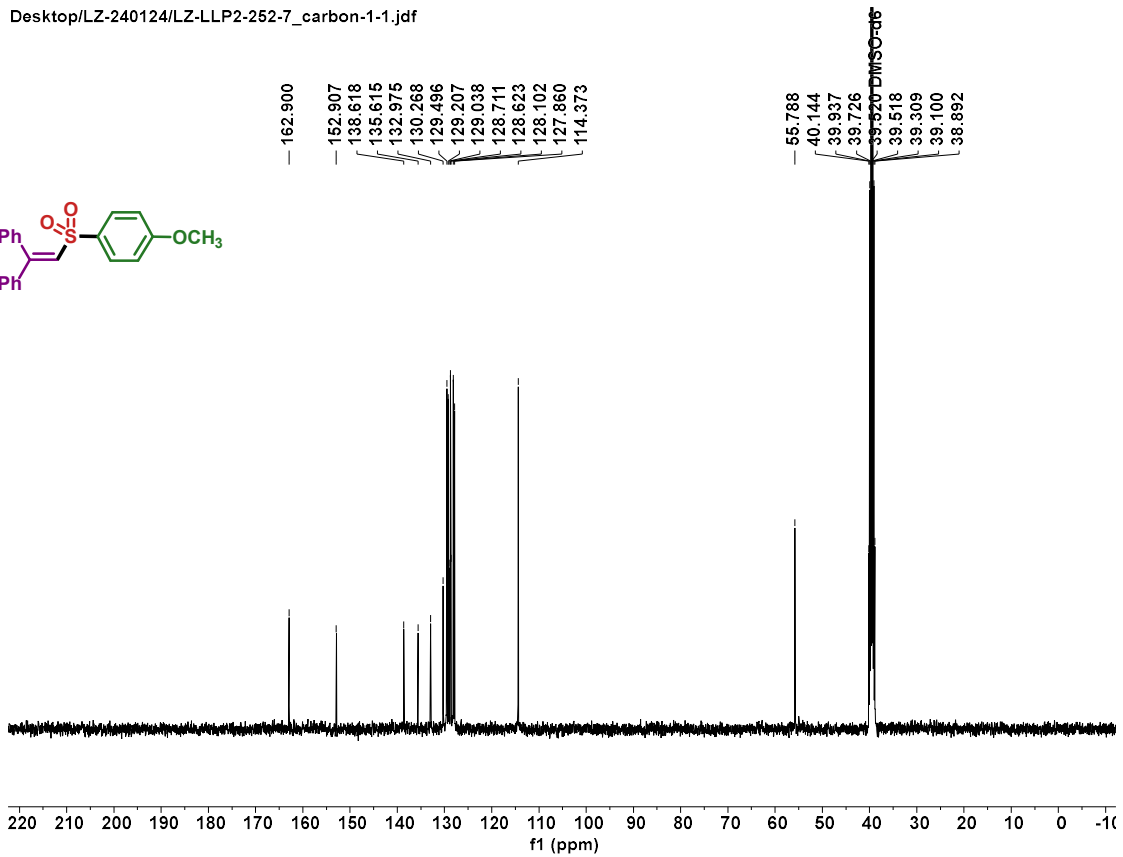

# NMR of Compound of 10

CX-2-252-6/1/fid

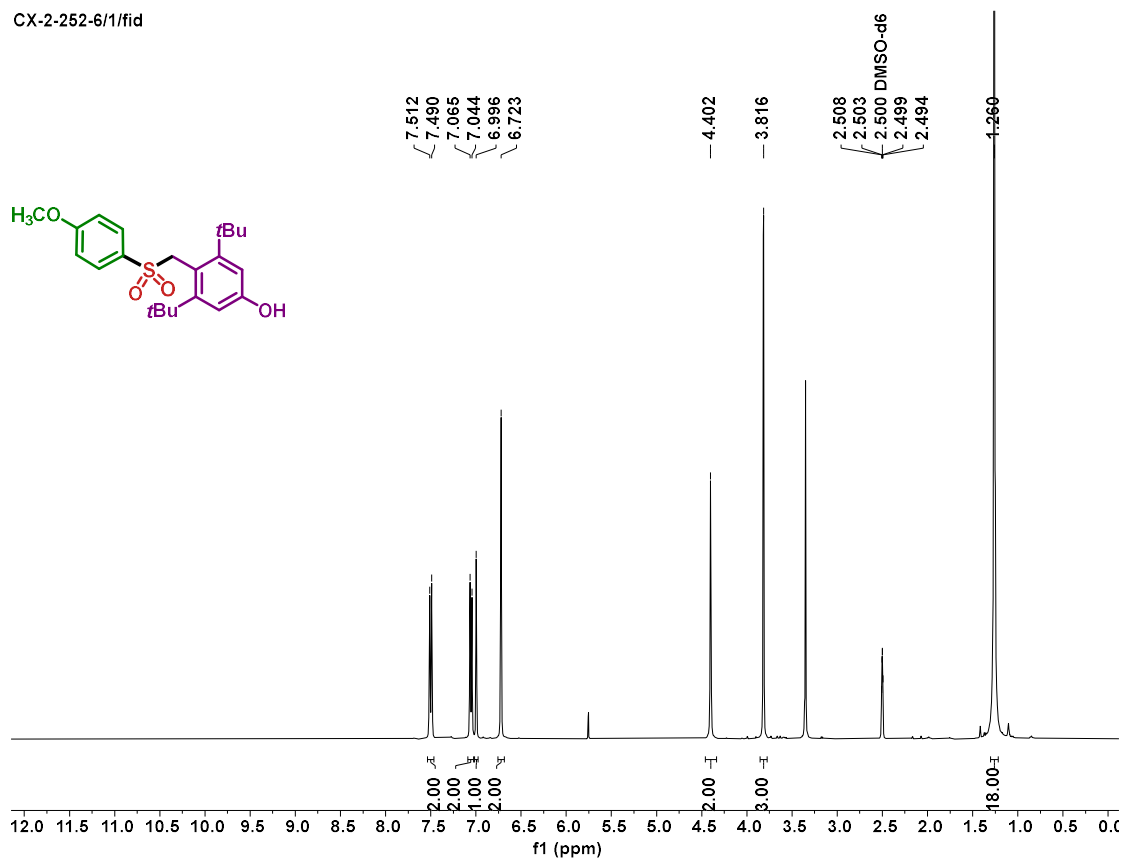

Desktop/LZ-240124/LZ-LLP2-252-6\_carbon-1-1.jdf

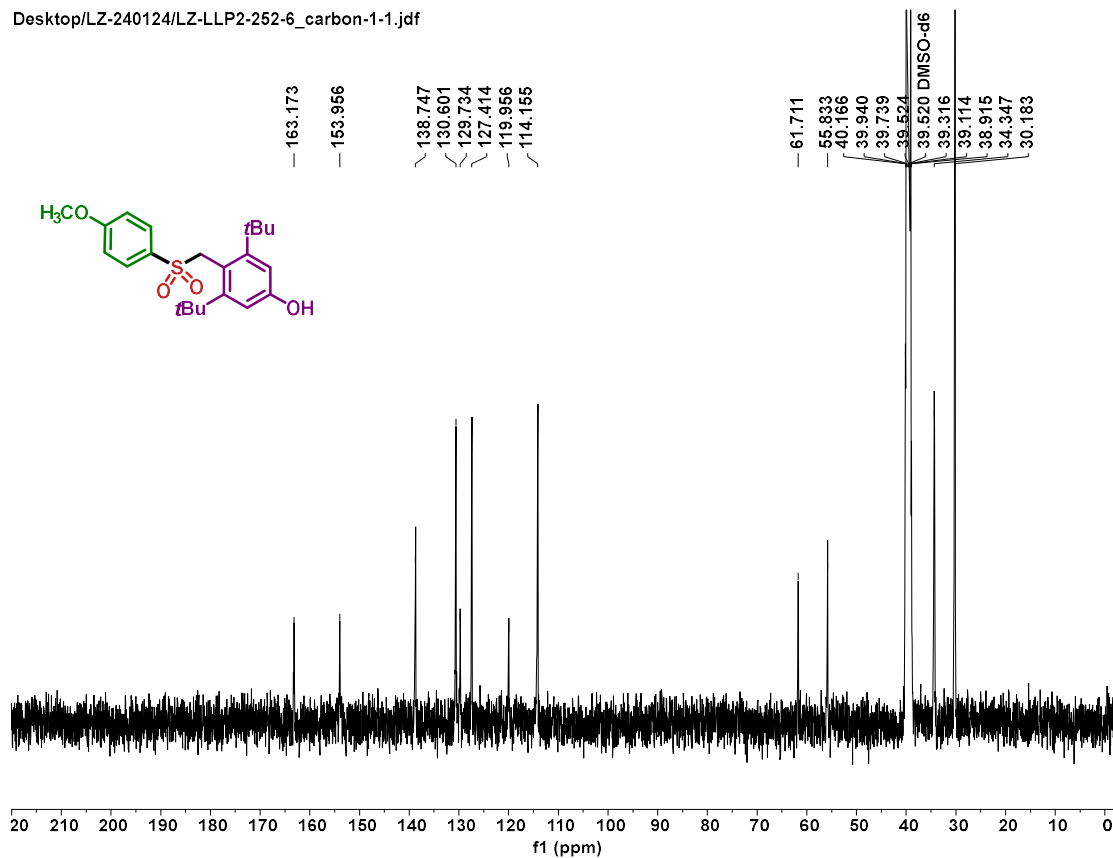

### HPLC chromatograms of Compound of 3a

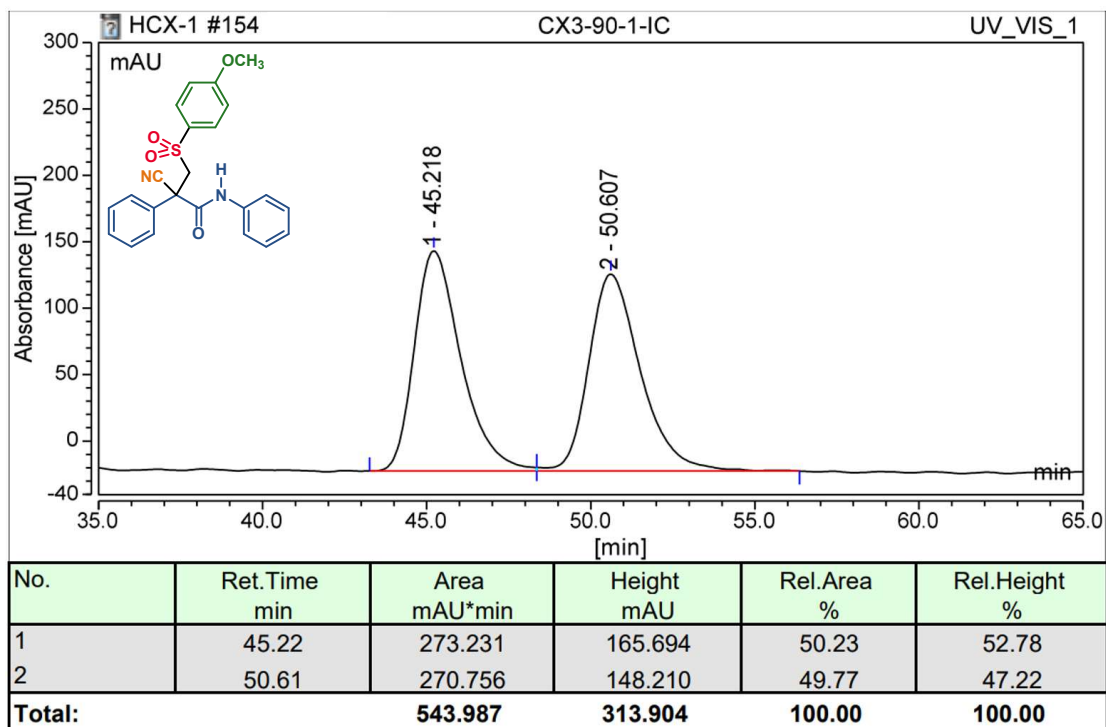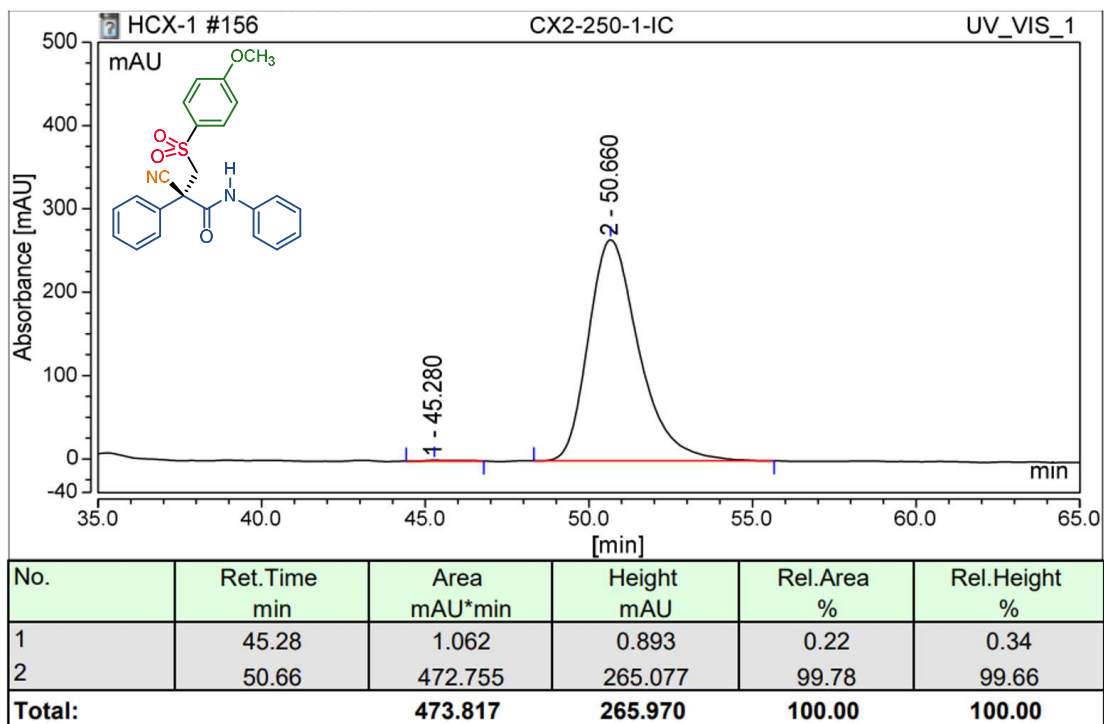

### HPLC chromatograms of Compound of 3b

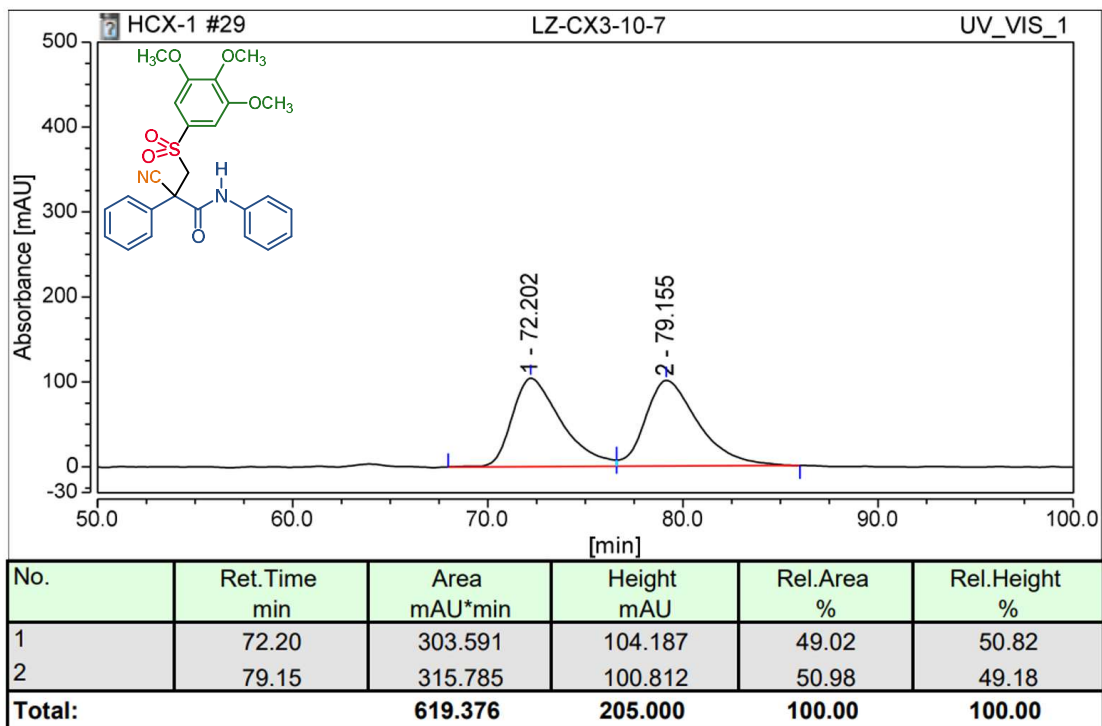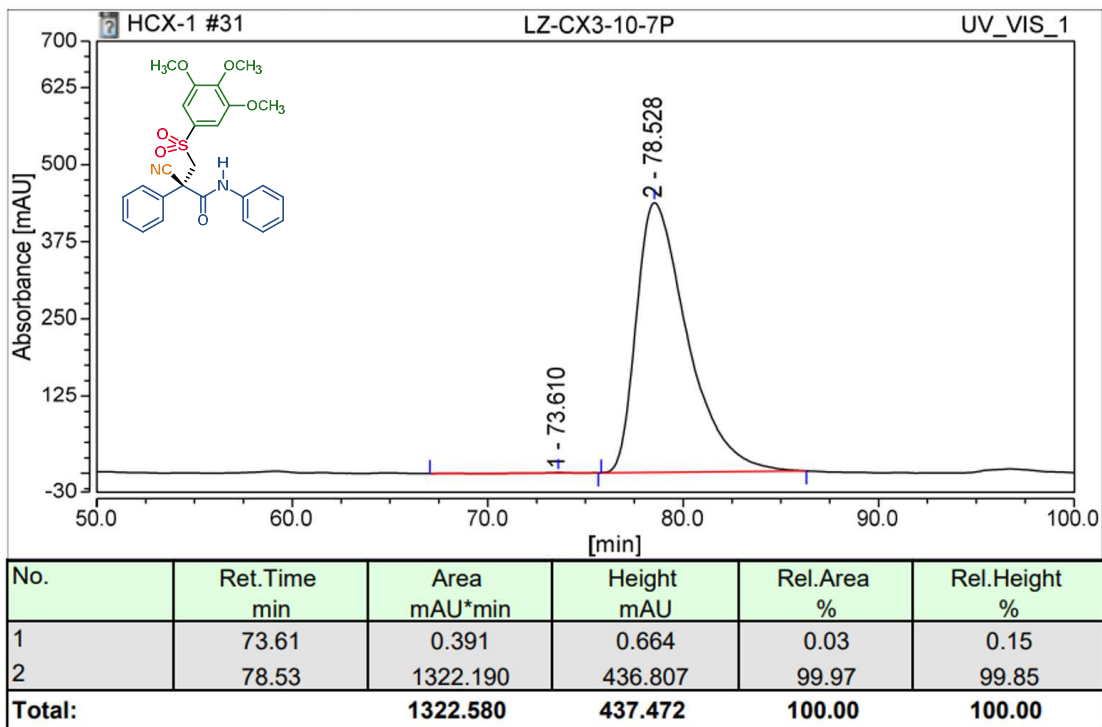



### HPLC chromatograms of Compound of 3c

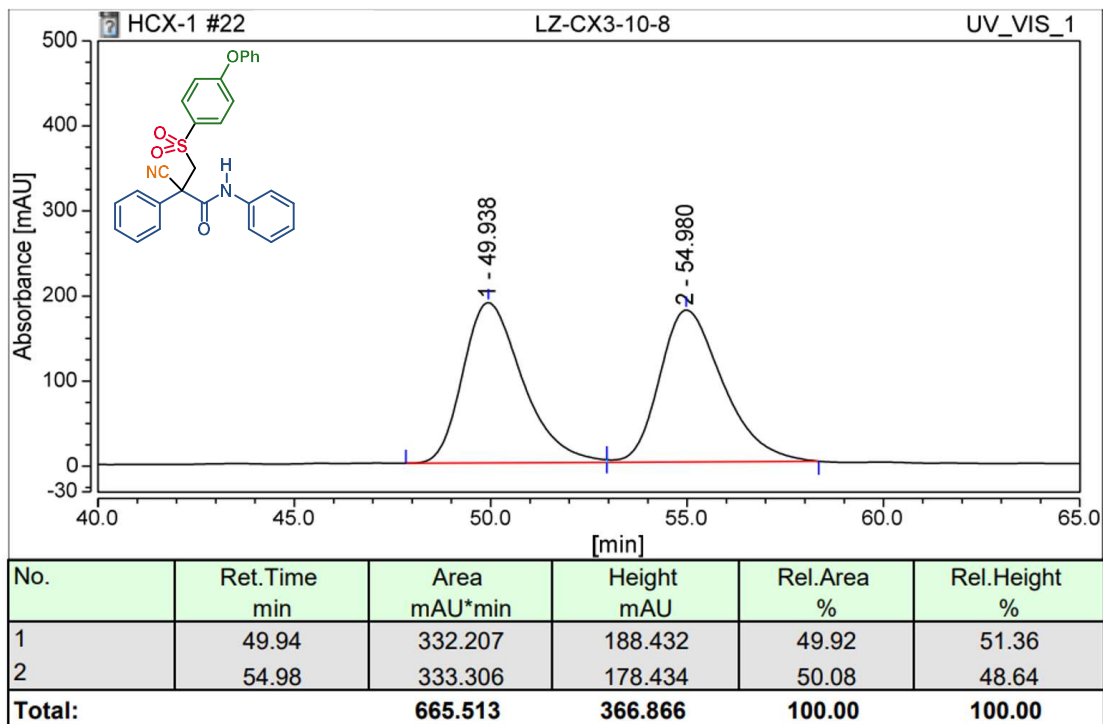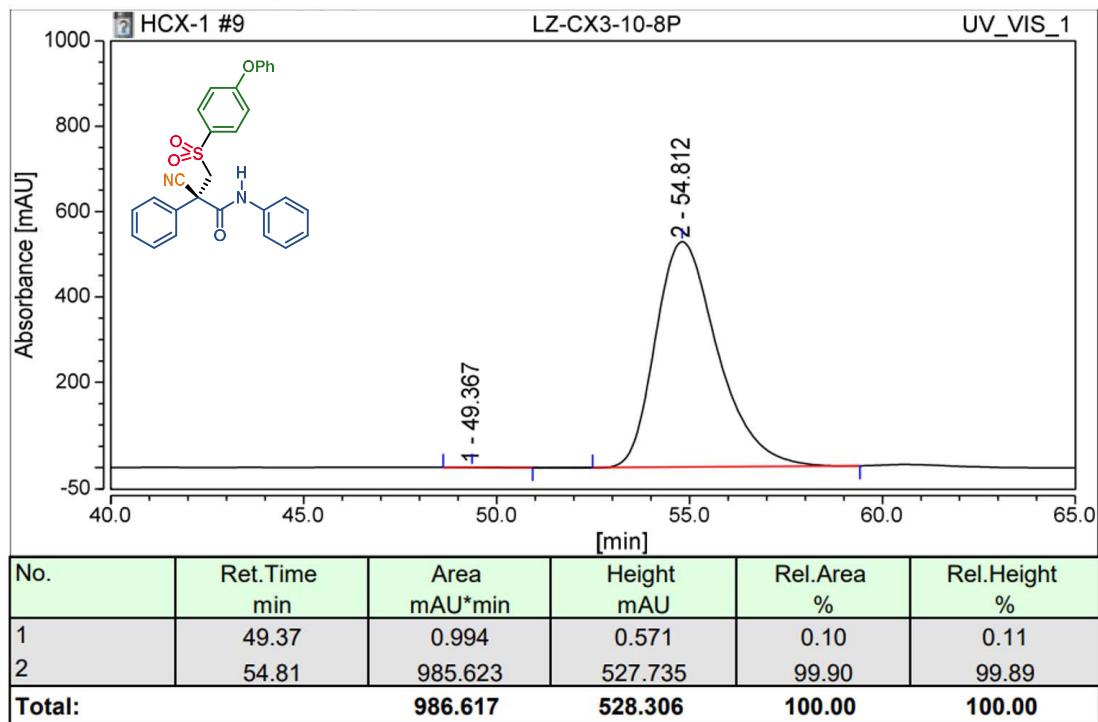

### HPLC chromatograms of Compound of 3d

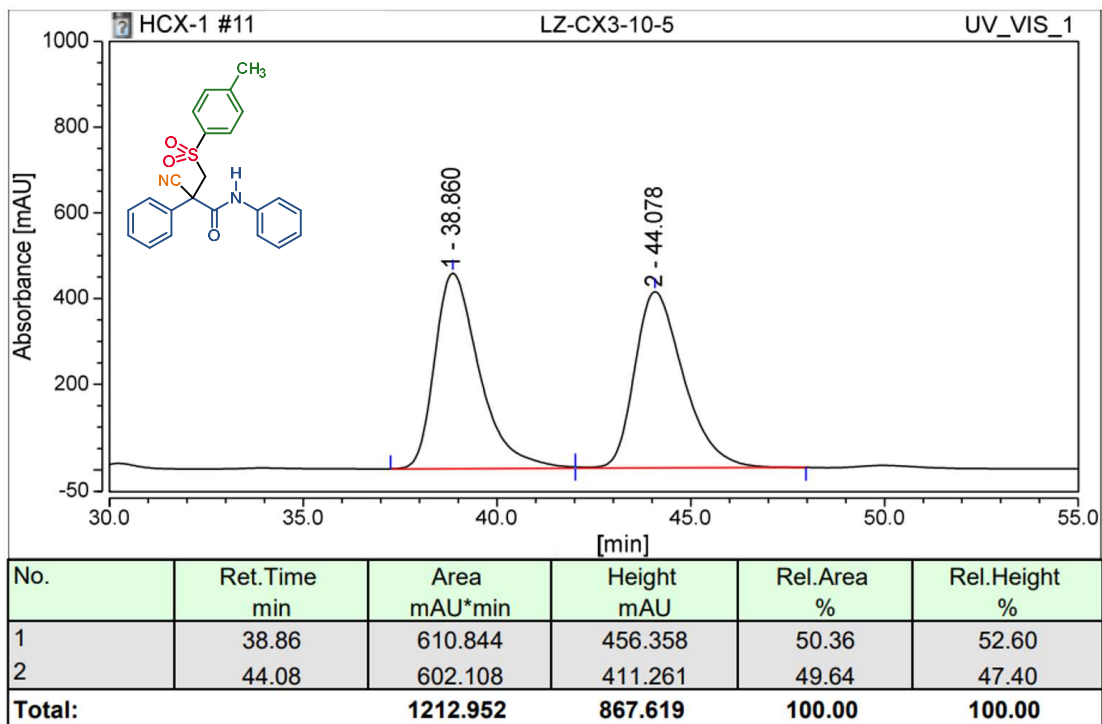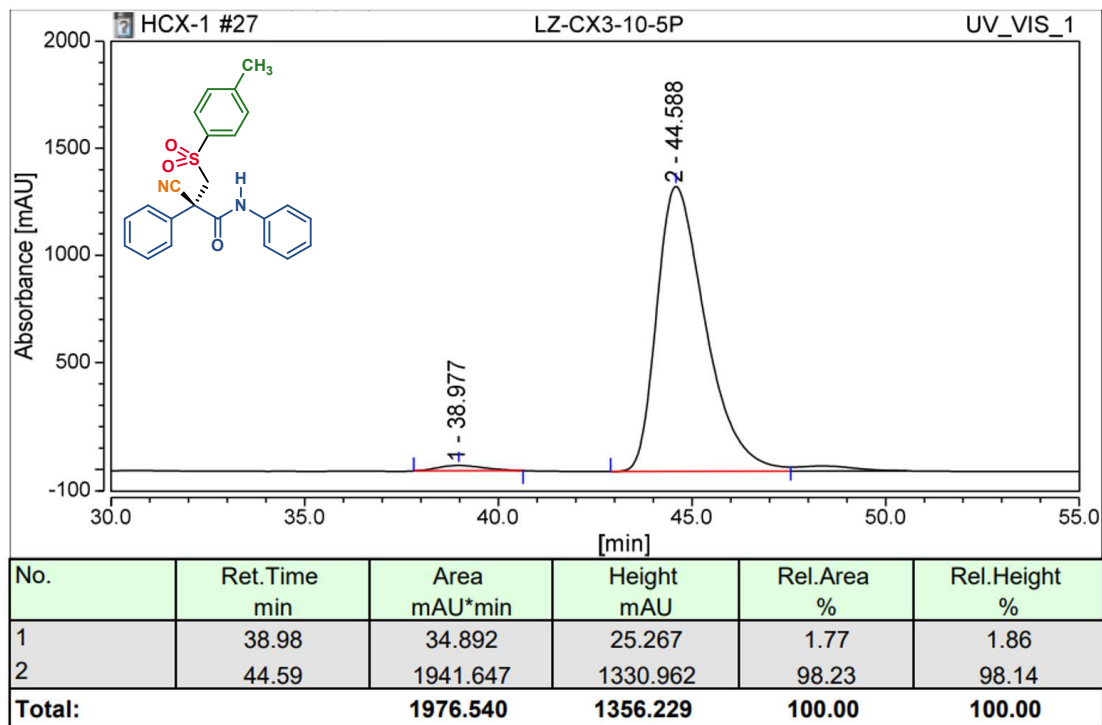

### HPLC chromatograms of Compound of 3e

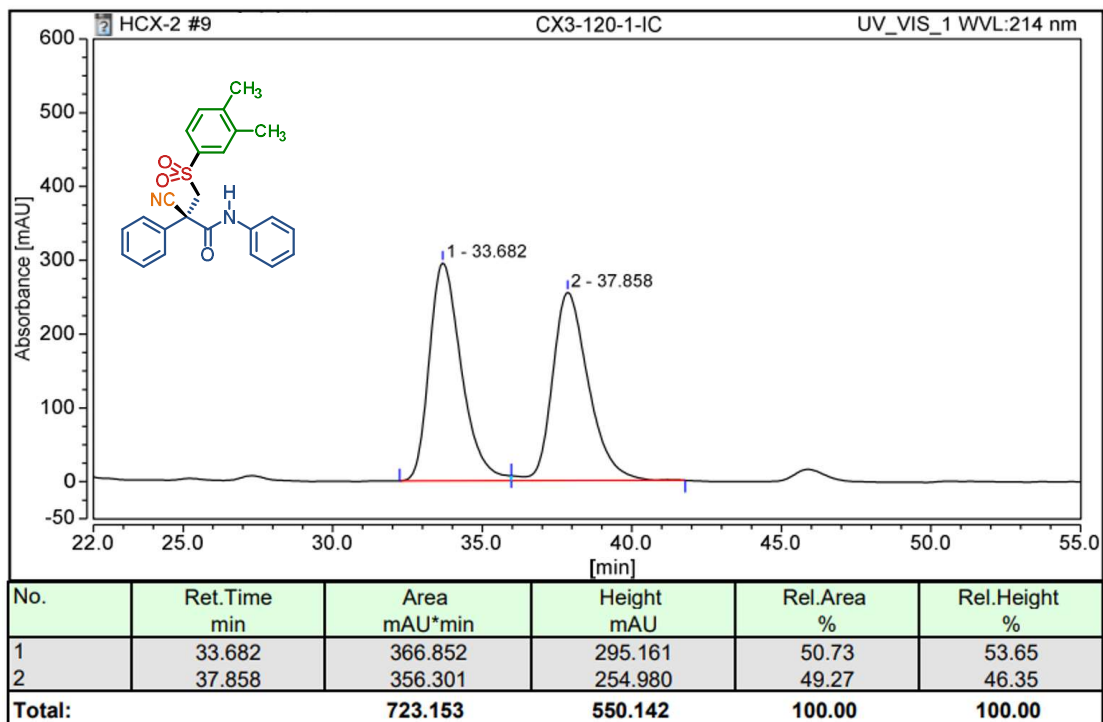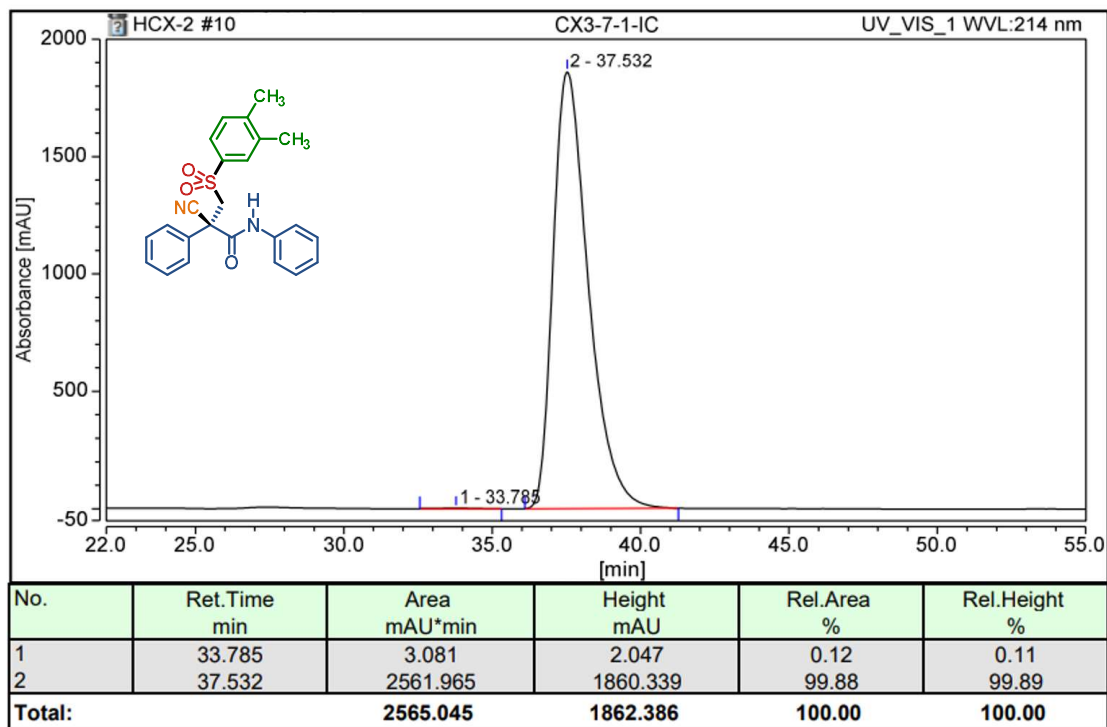

### HPLC chromatograms of Compound of 3f

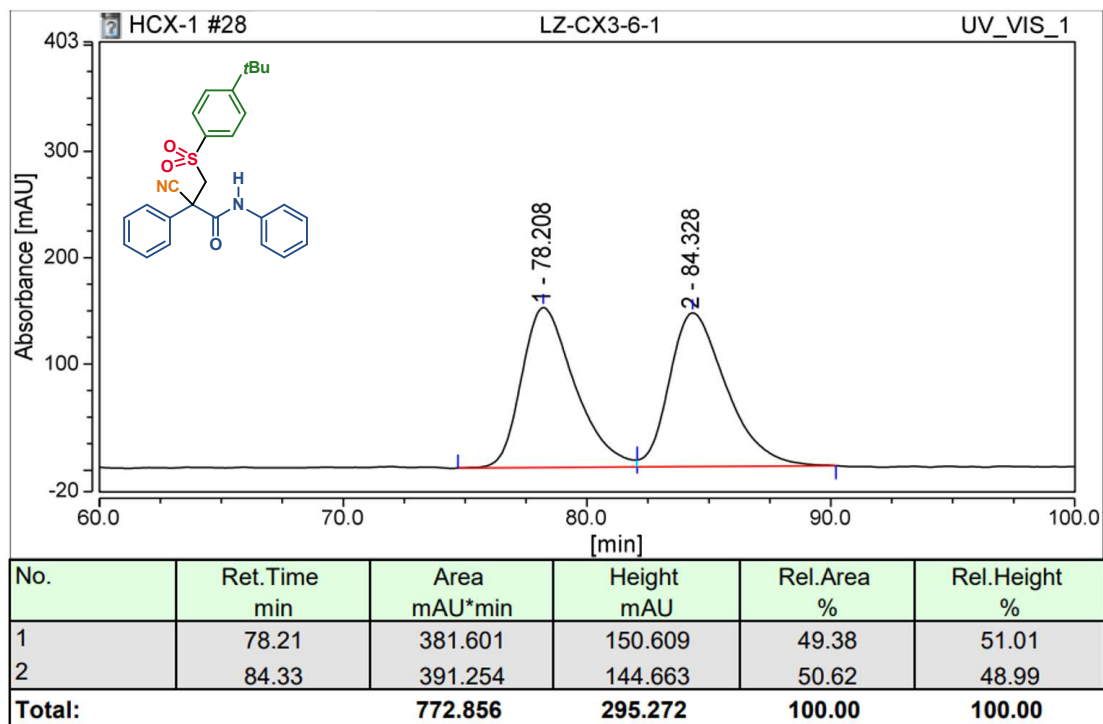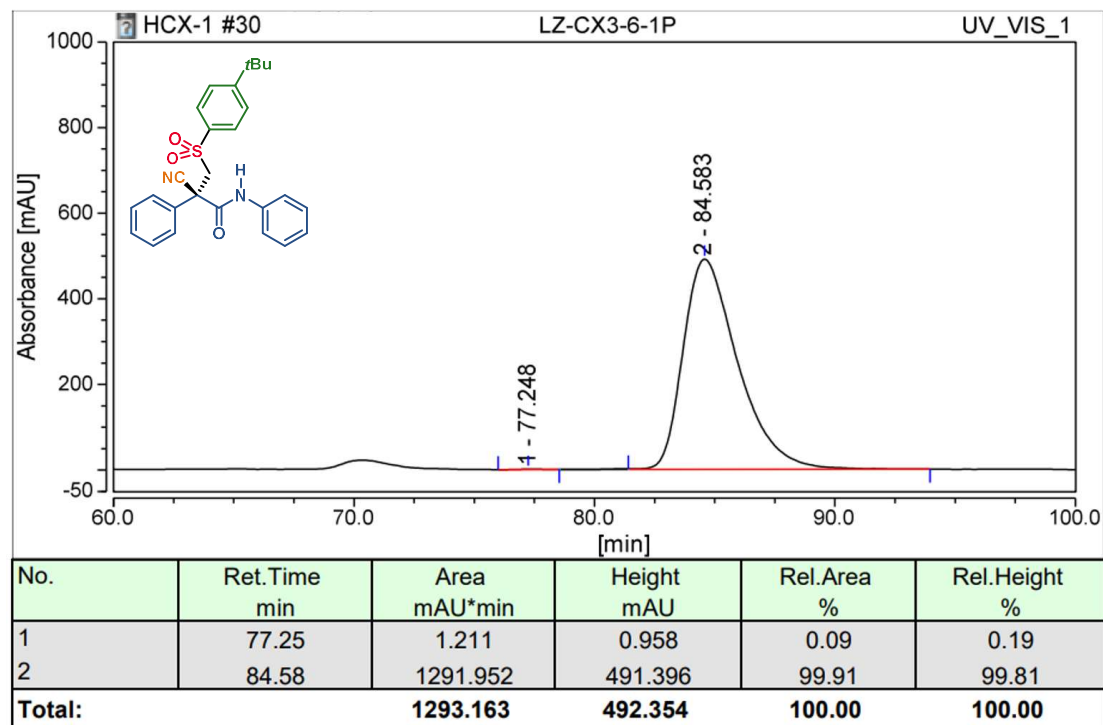

### HPLC chromatograms of Compound of 3g

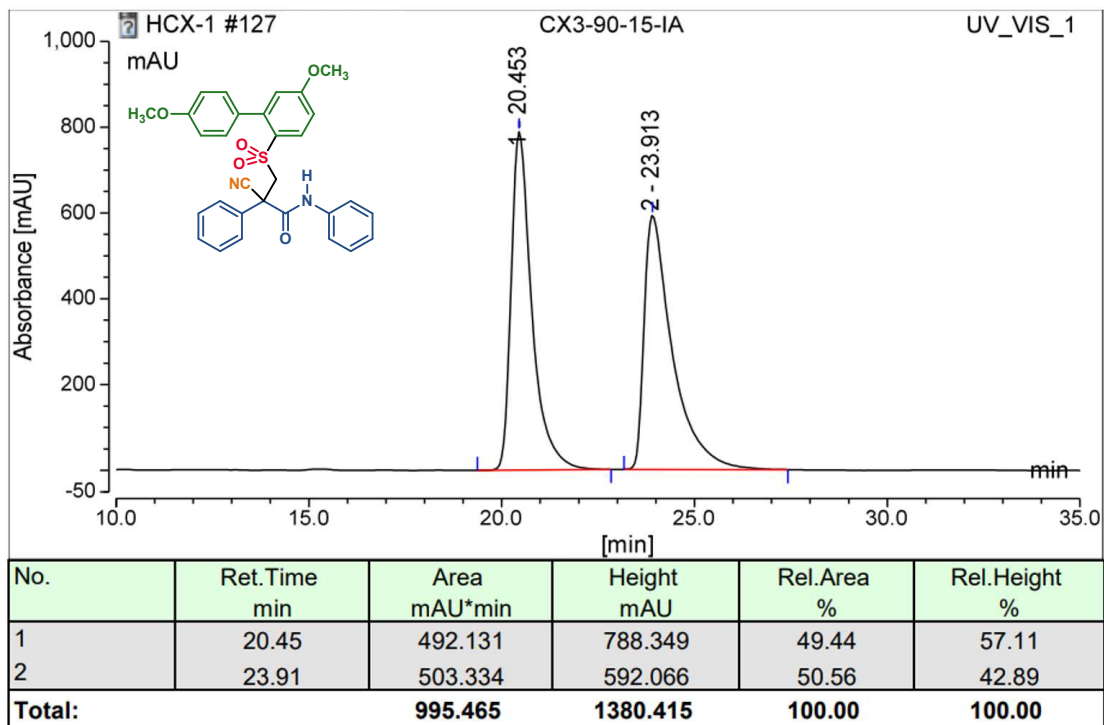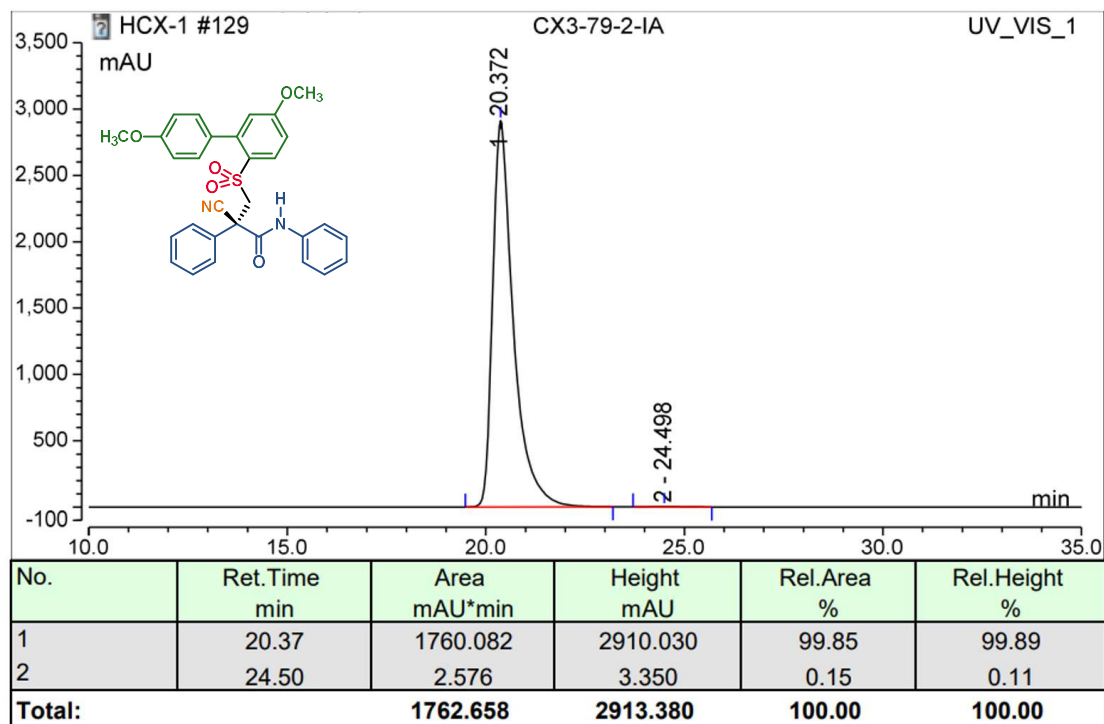

### HPLC chromatograms of Compound of 3h

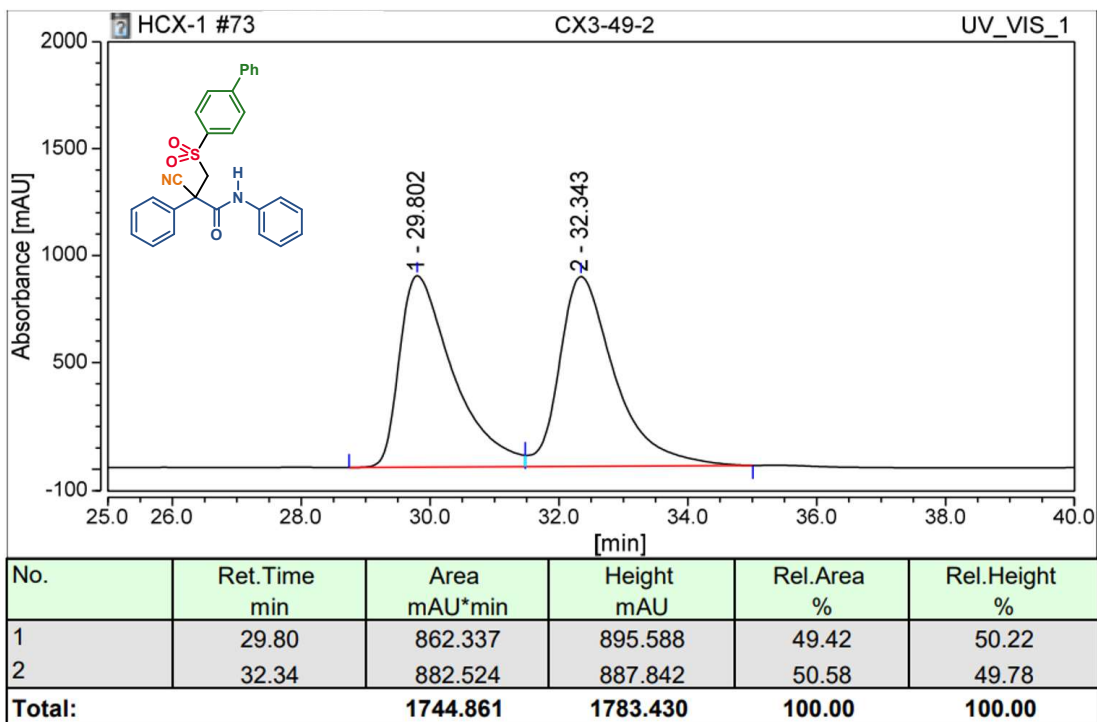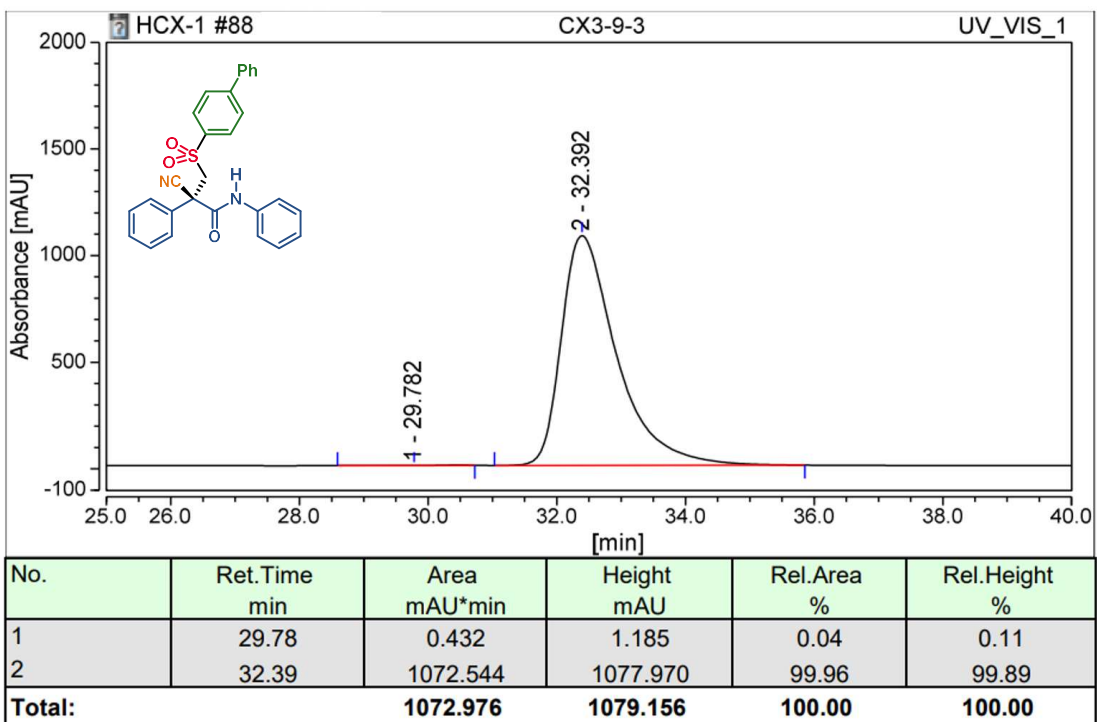

### HPLC chromatograms of Compound of 3i

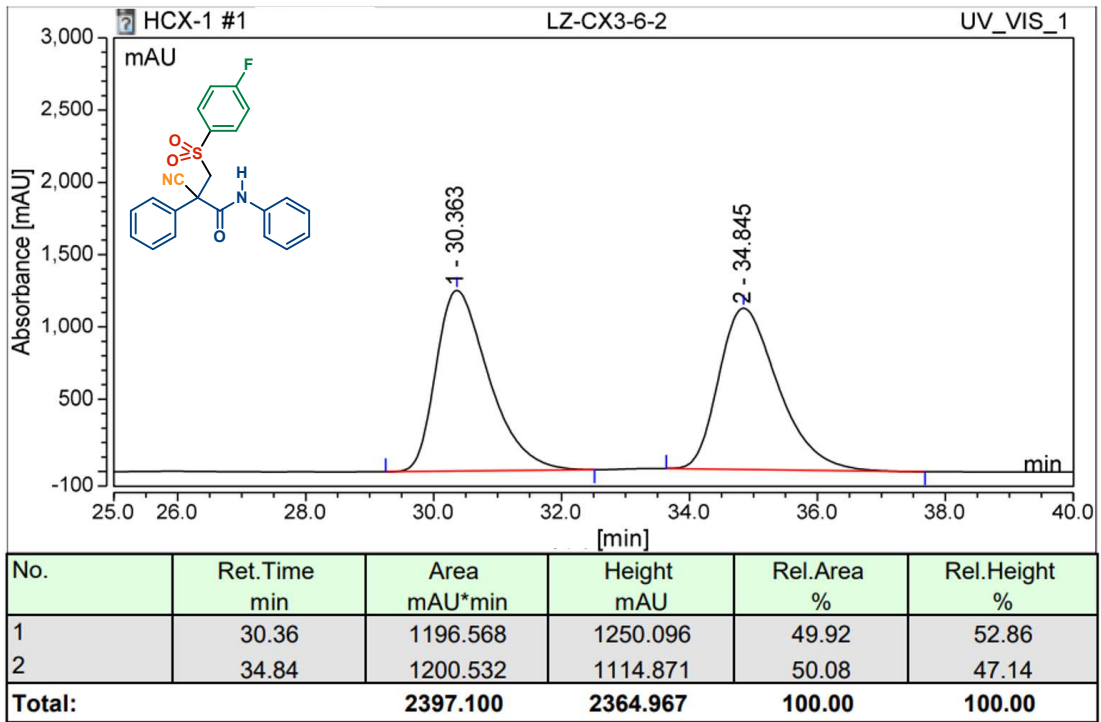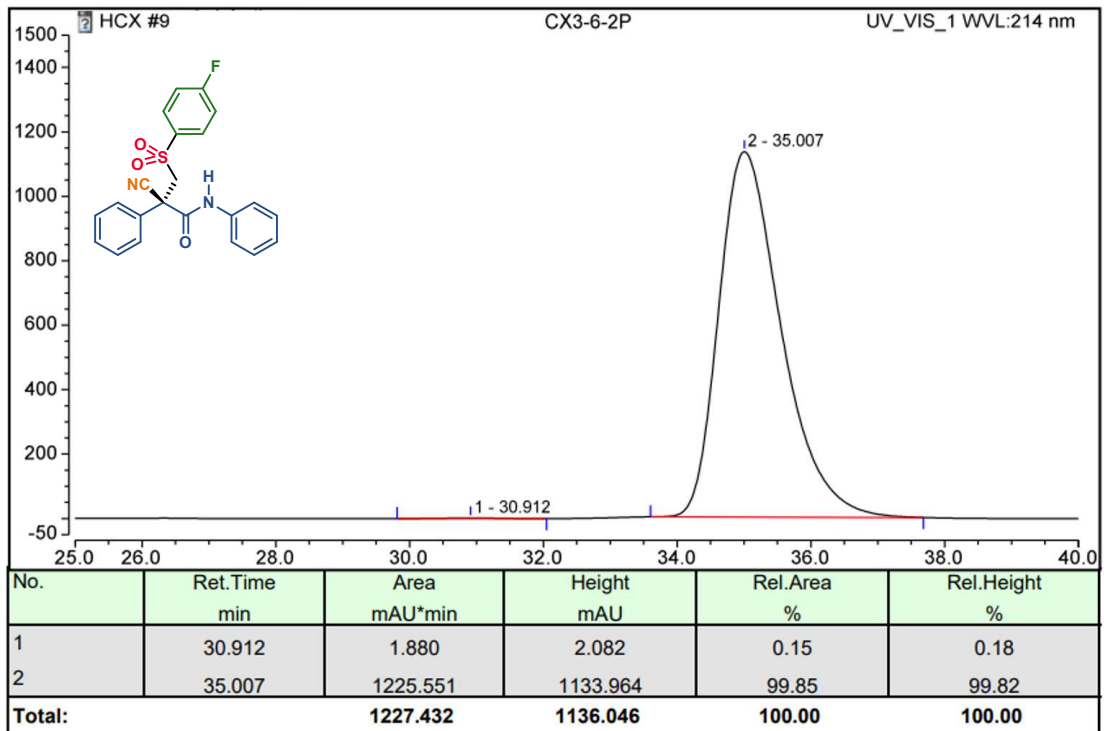

### HPLC chromatograms of Compound of 3j

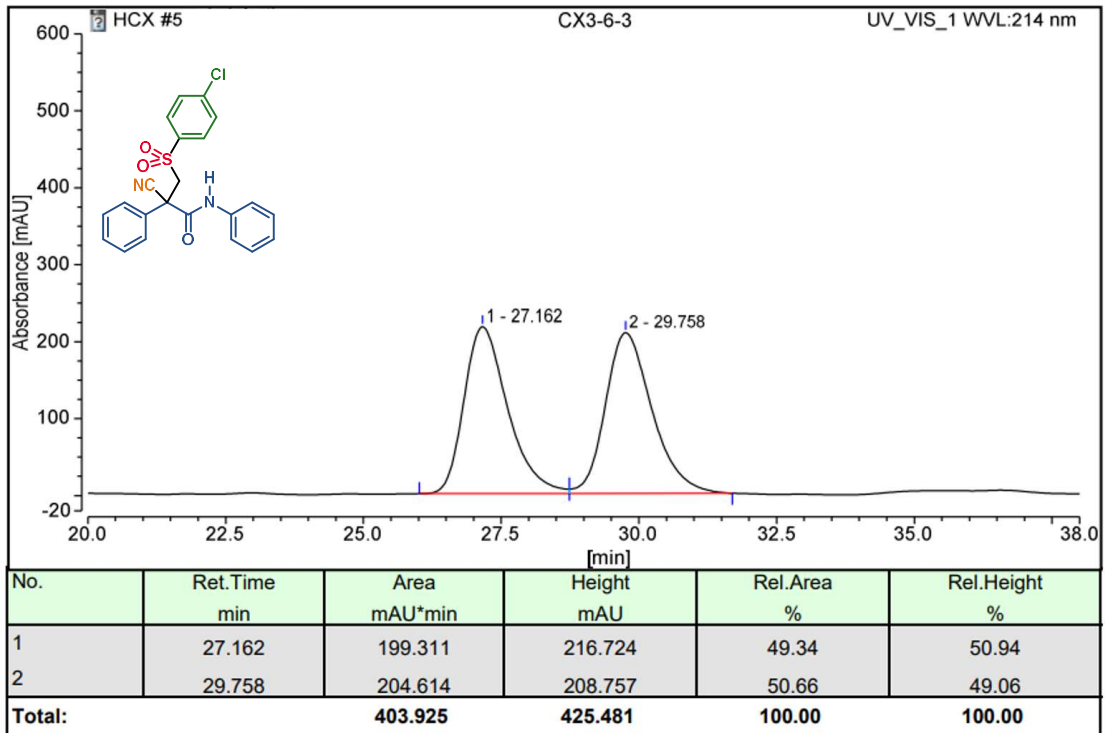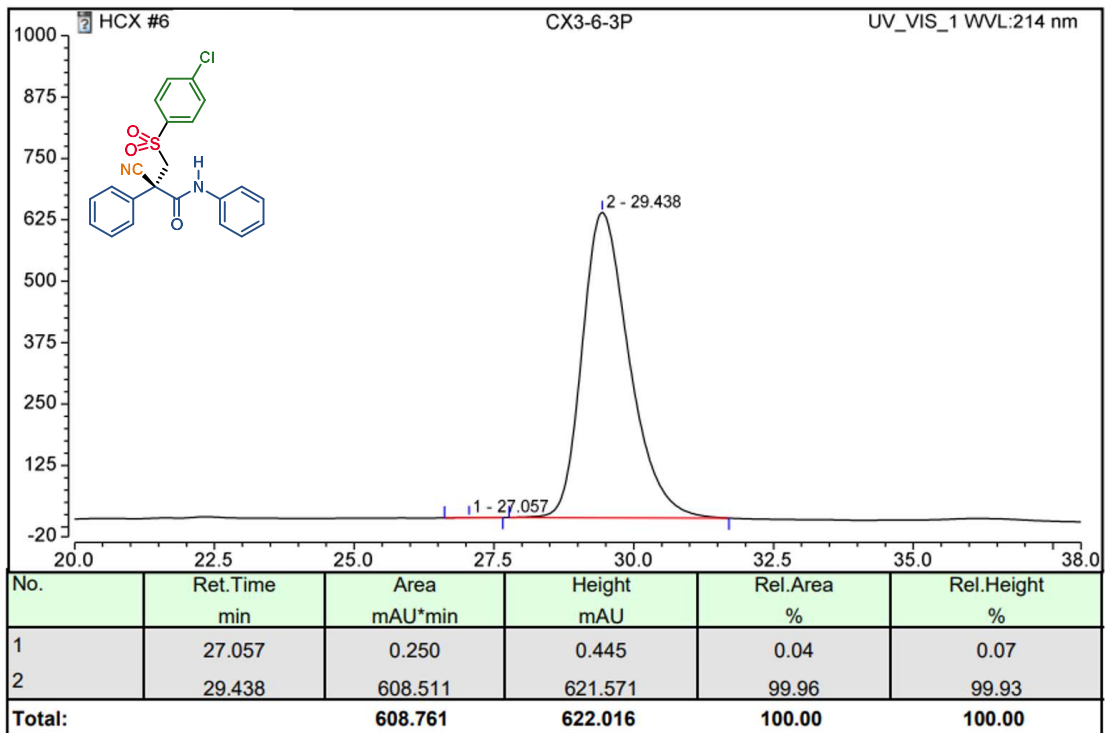



### HPLC chromatograms of Compound of 3k

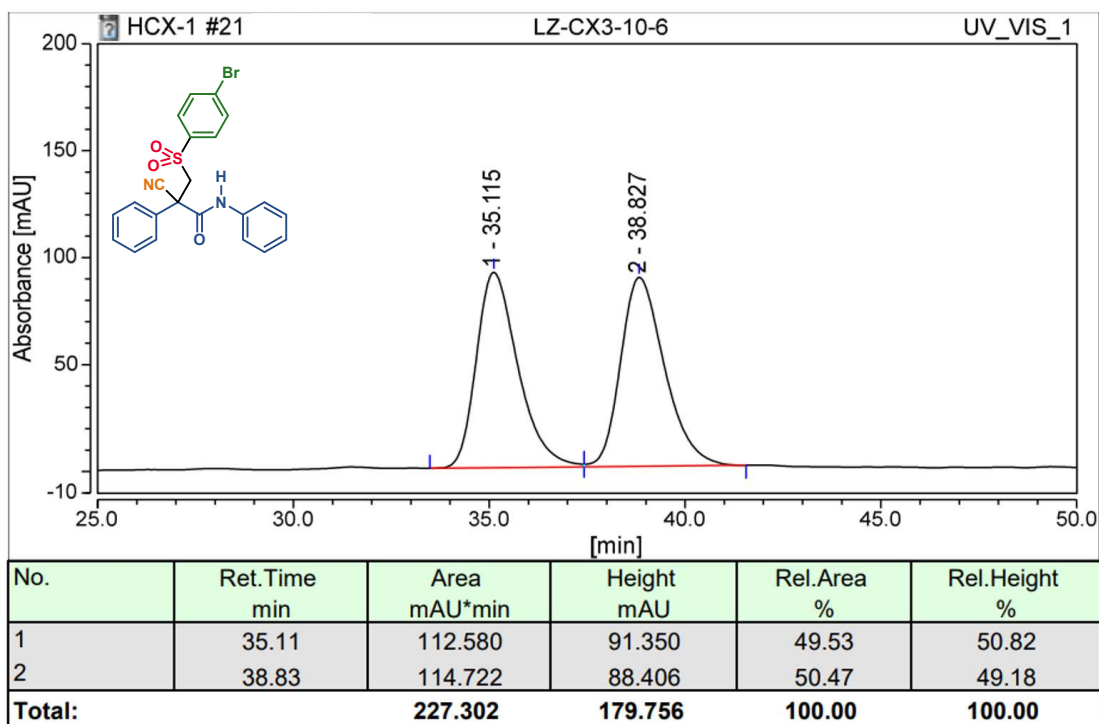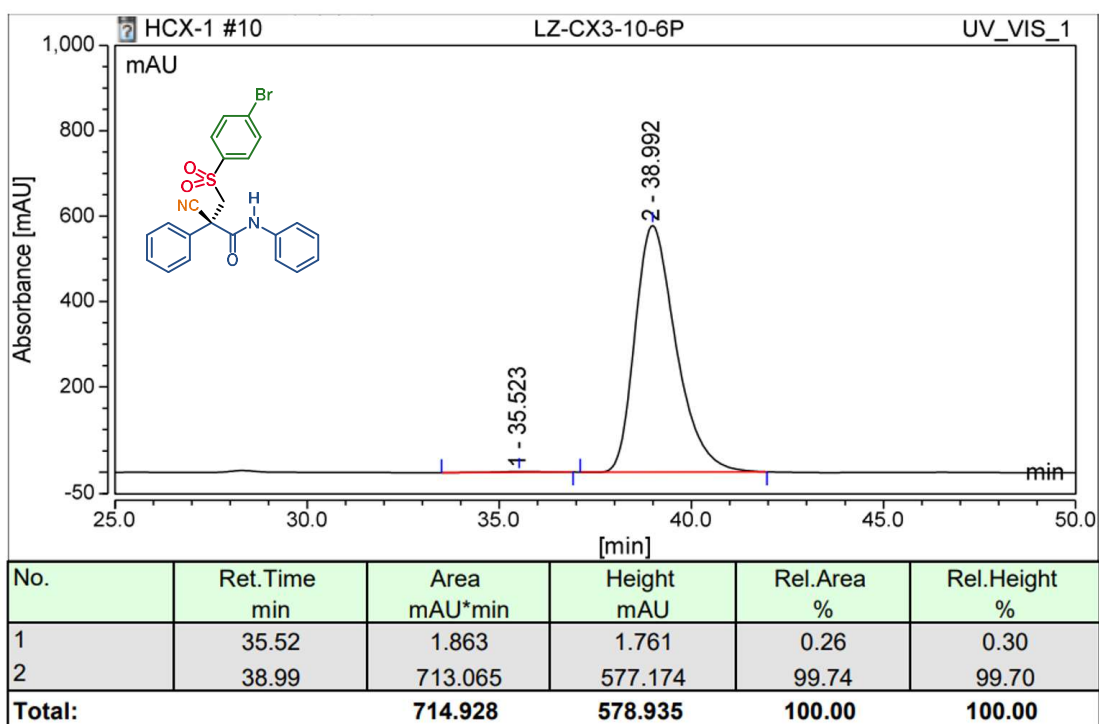

### HPLC chromatograms of Compound of 3I

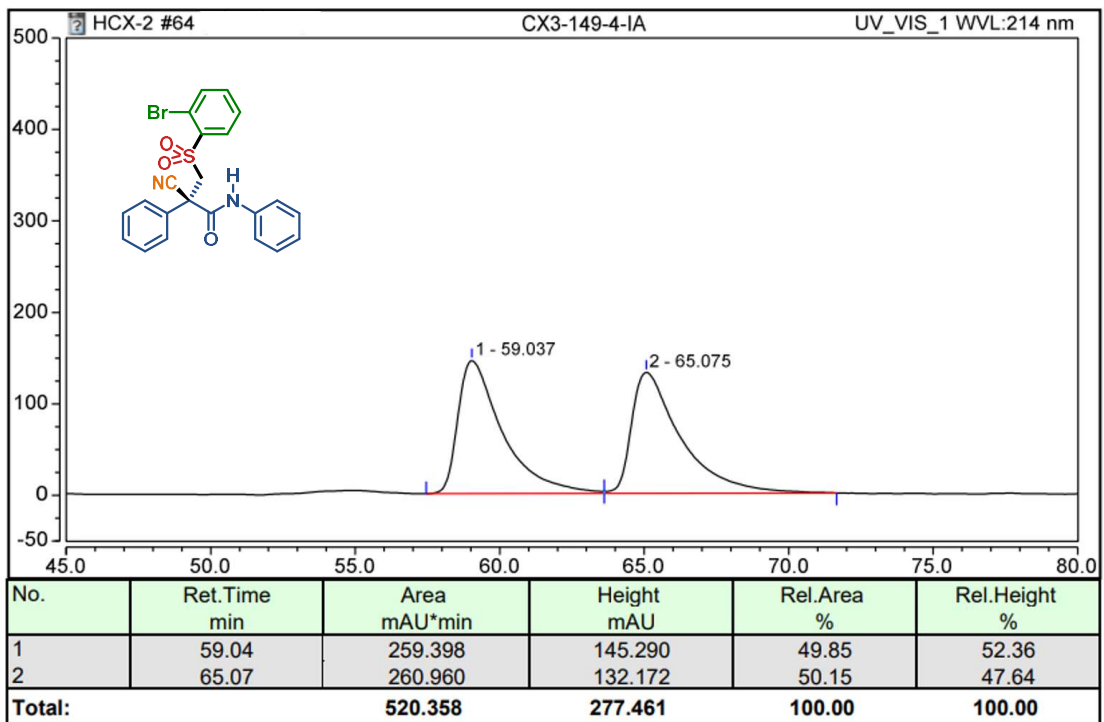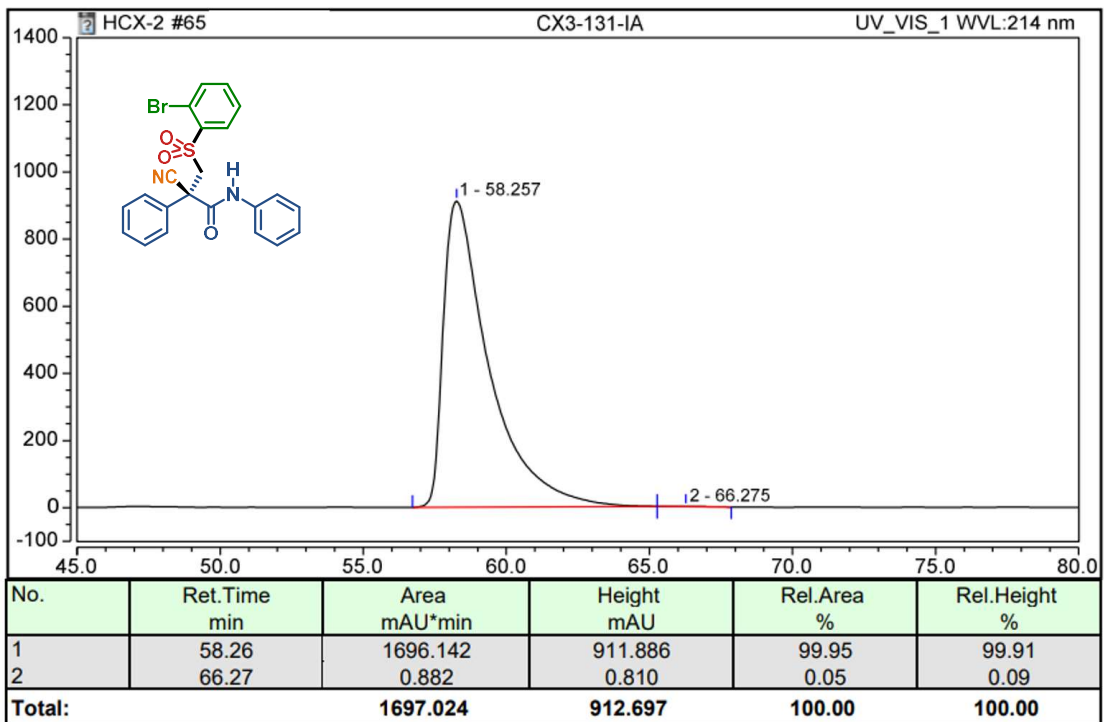

### HPLC chromatograms of Compound of 3m

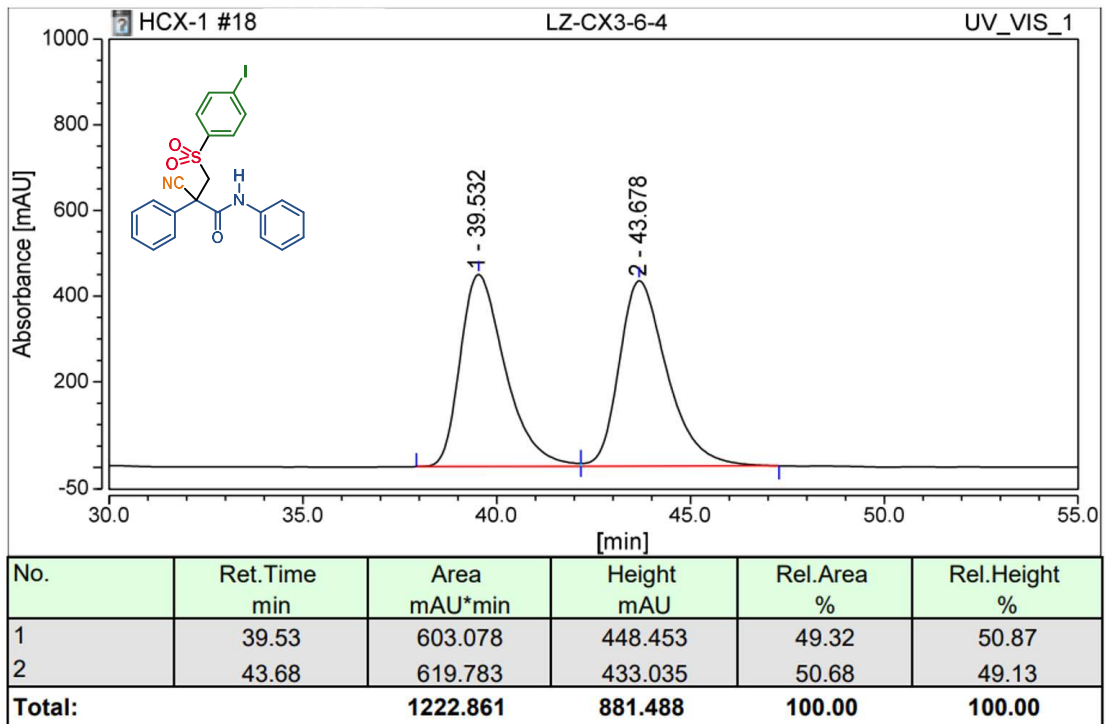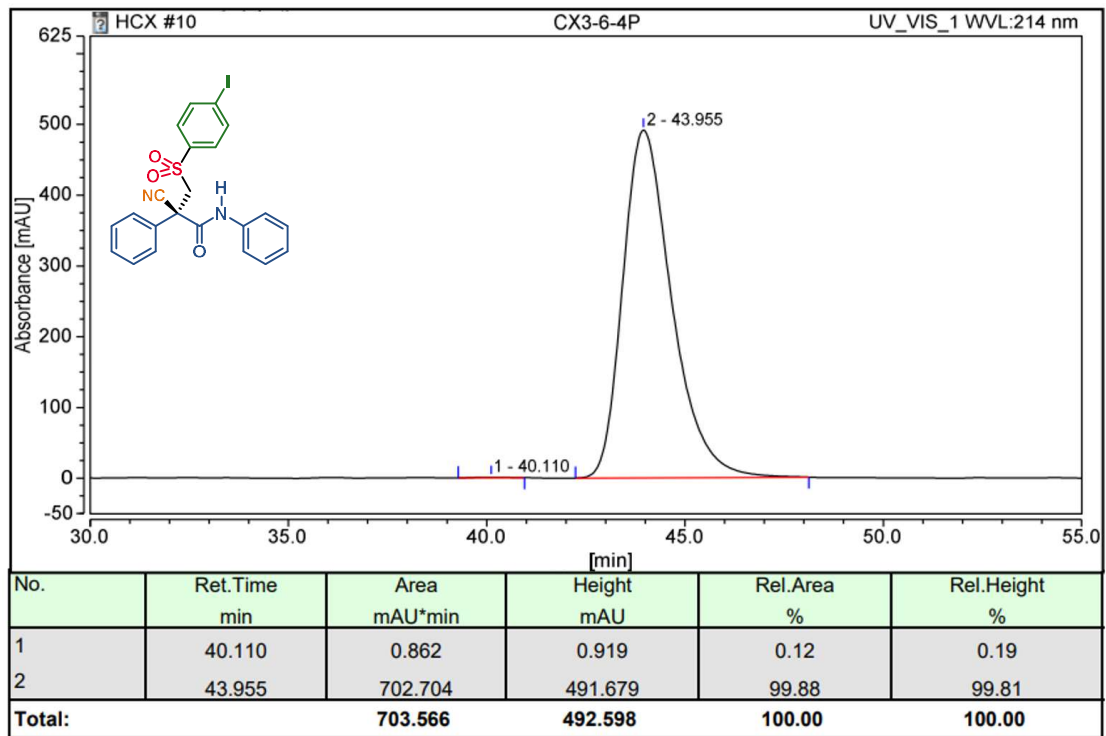

### HPLC chromatograms of Compound of 3n

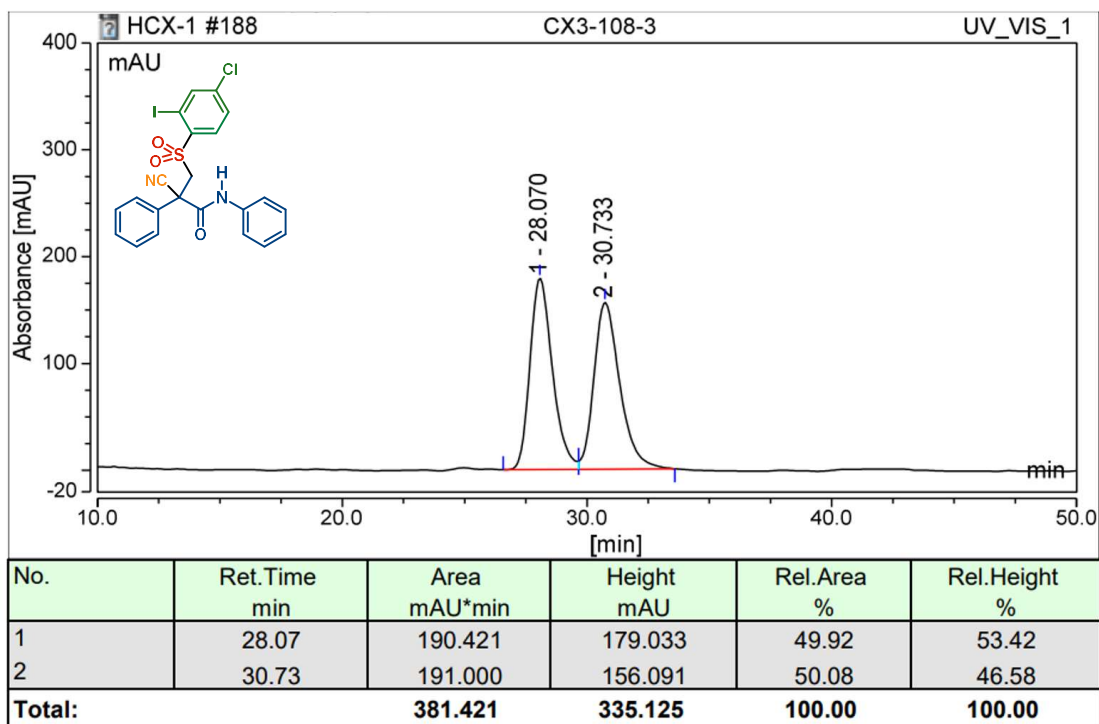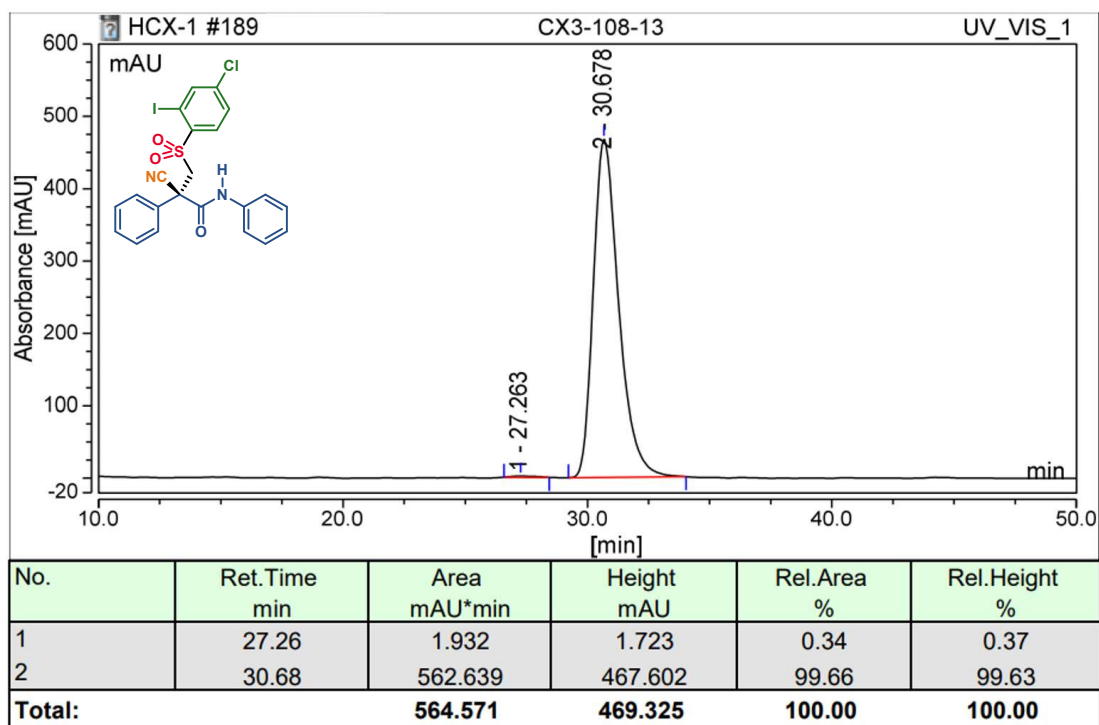

### HPLC chromatograms of Compound of 3o

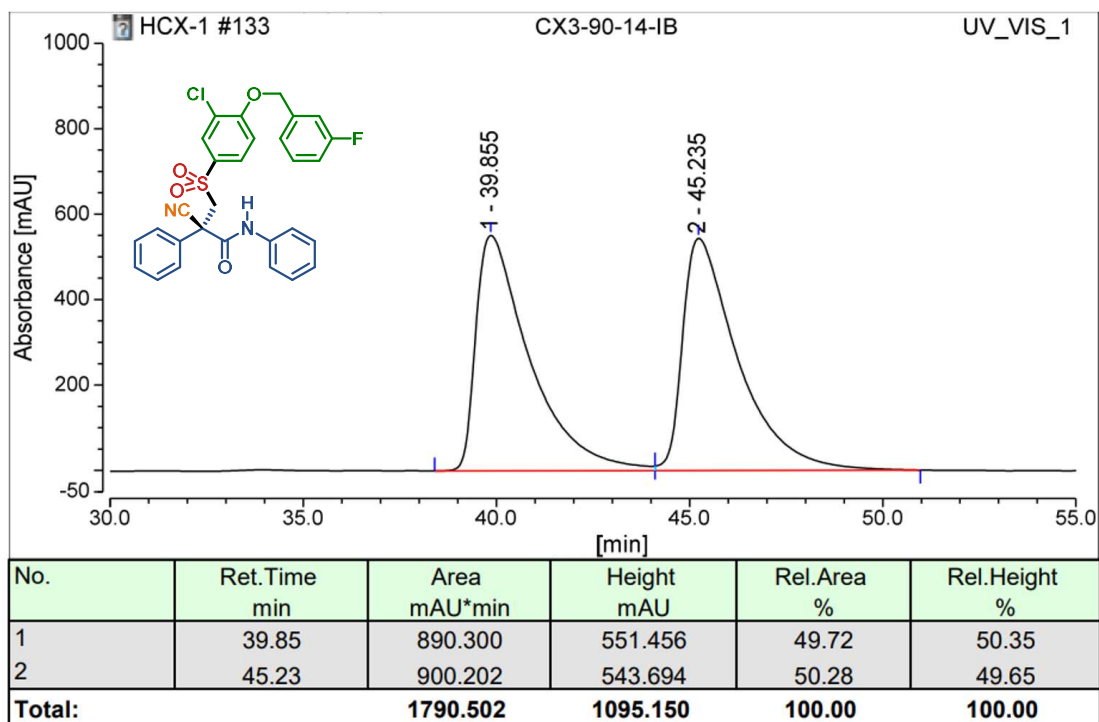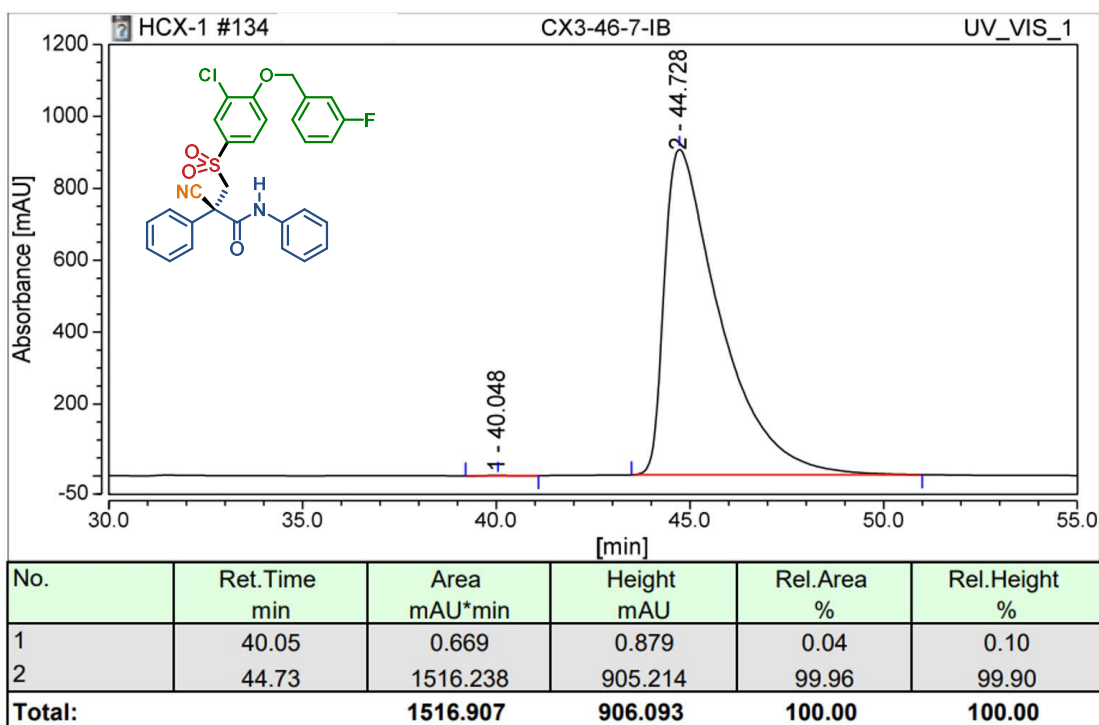

### HPLC chromatograms of Compound of 3p

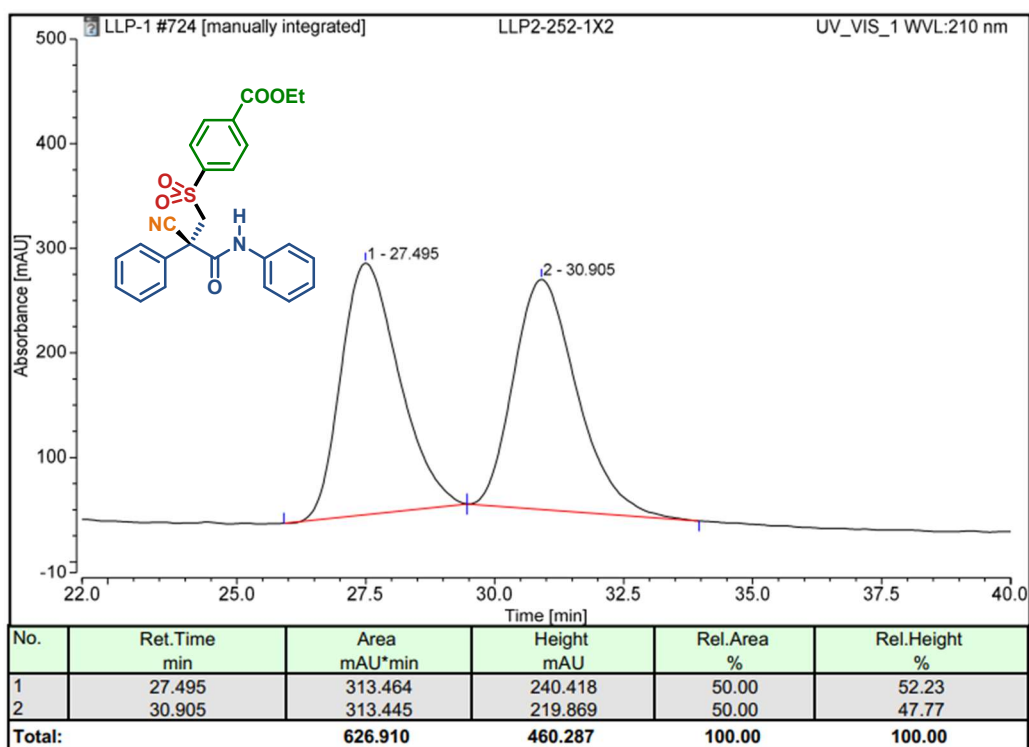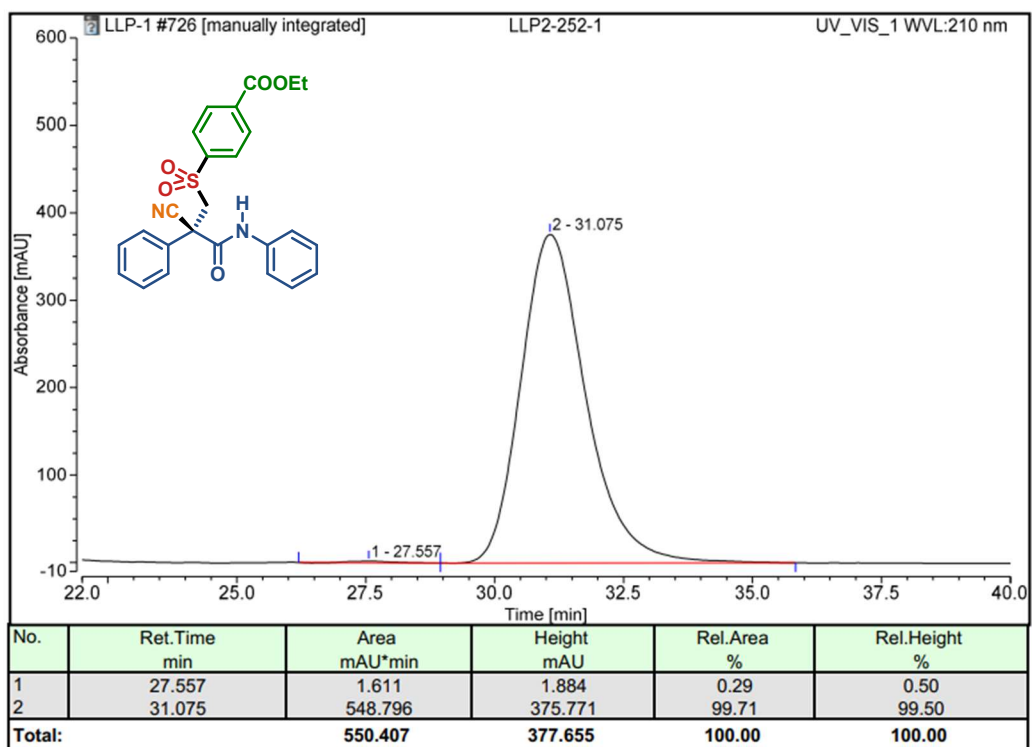

### HPLC chromatograms of Compound of 3q

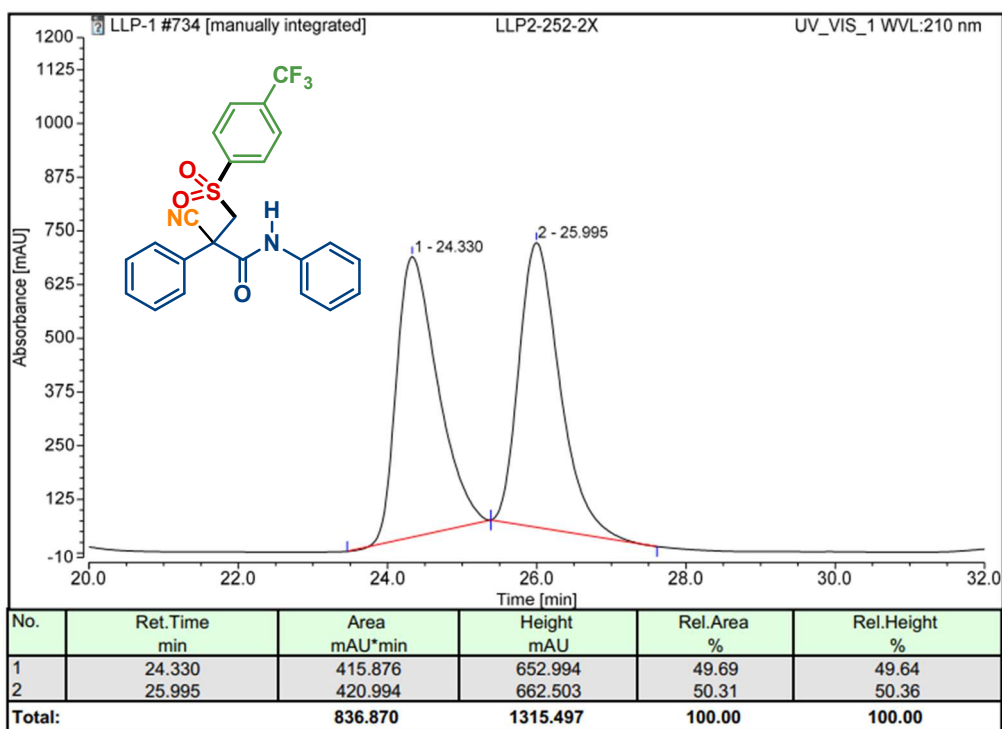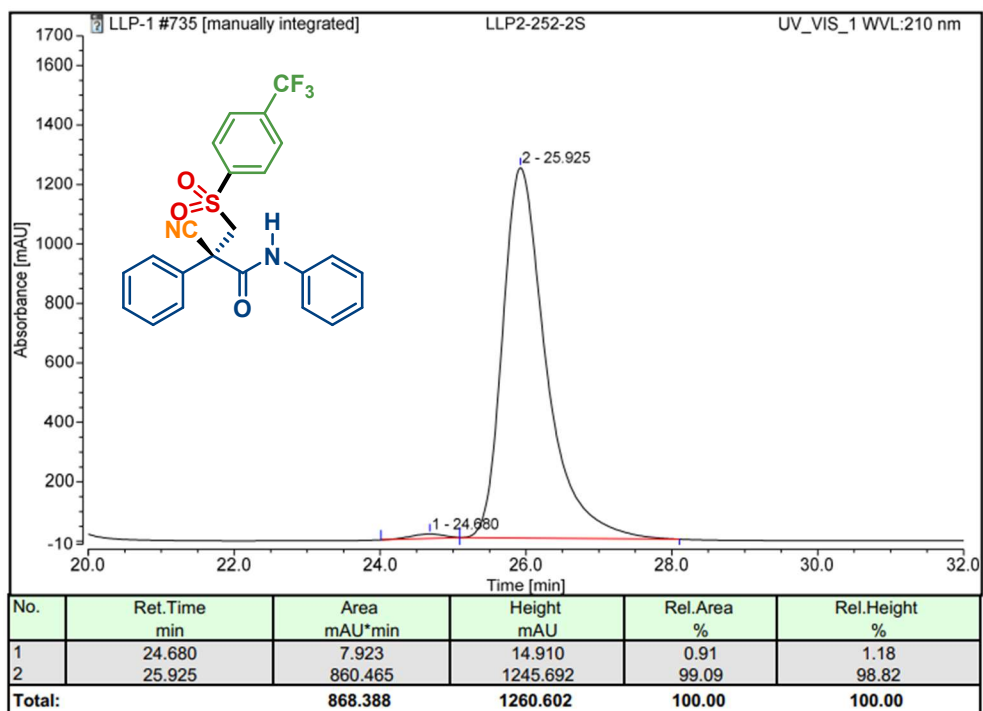

### HPLC chromatograms of Compound of 3r

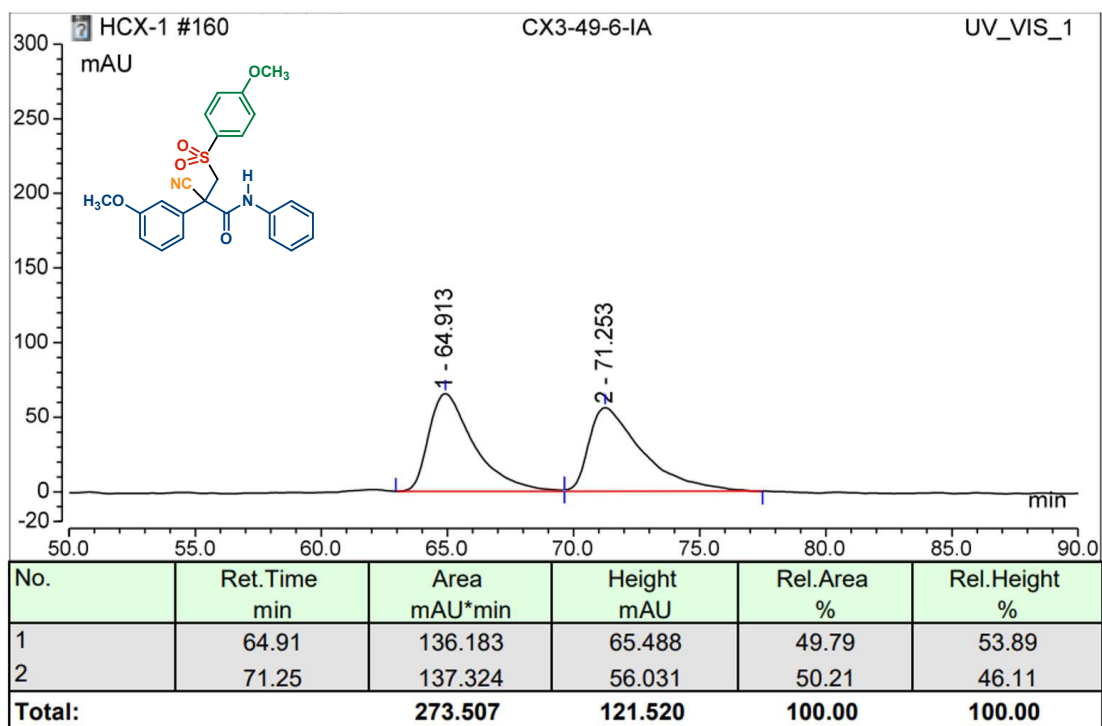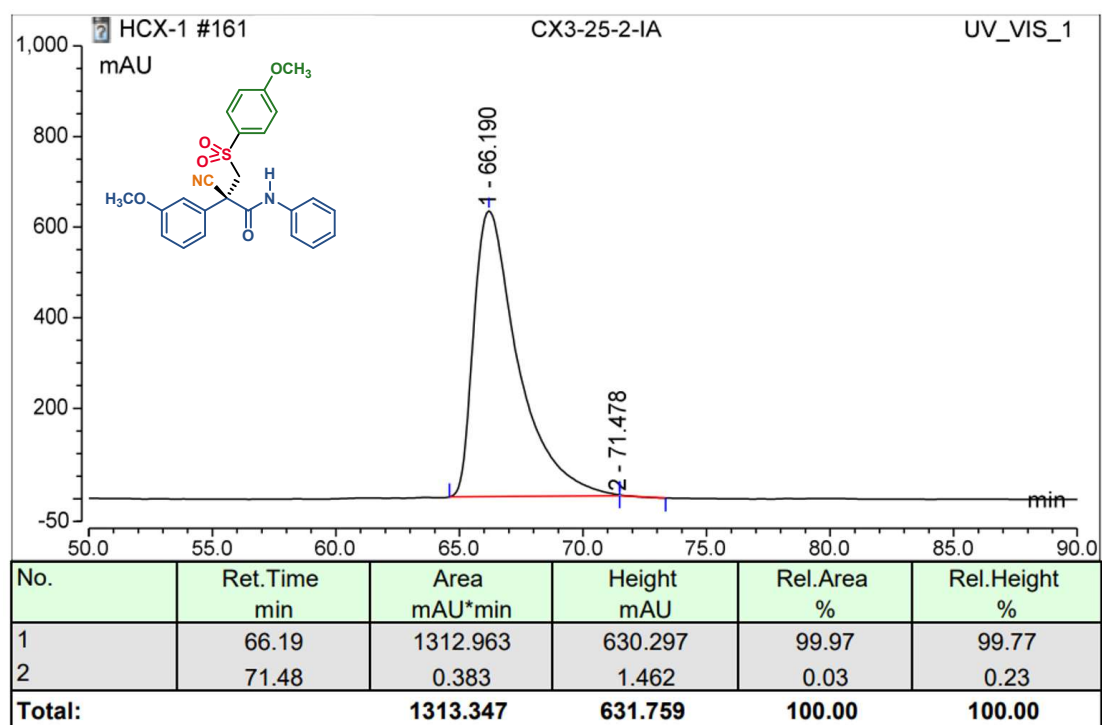



### HPLC chromatograms of Compound of 3s

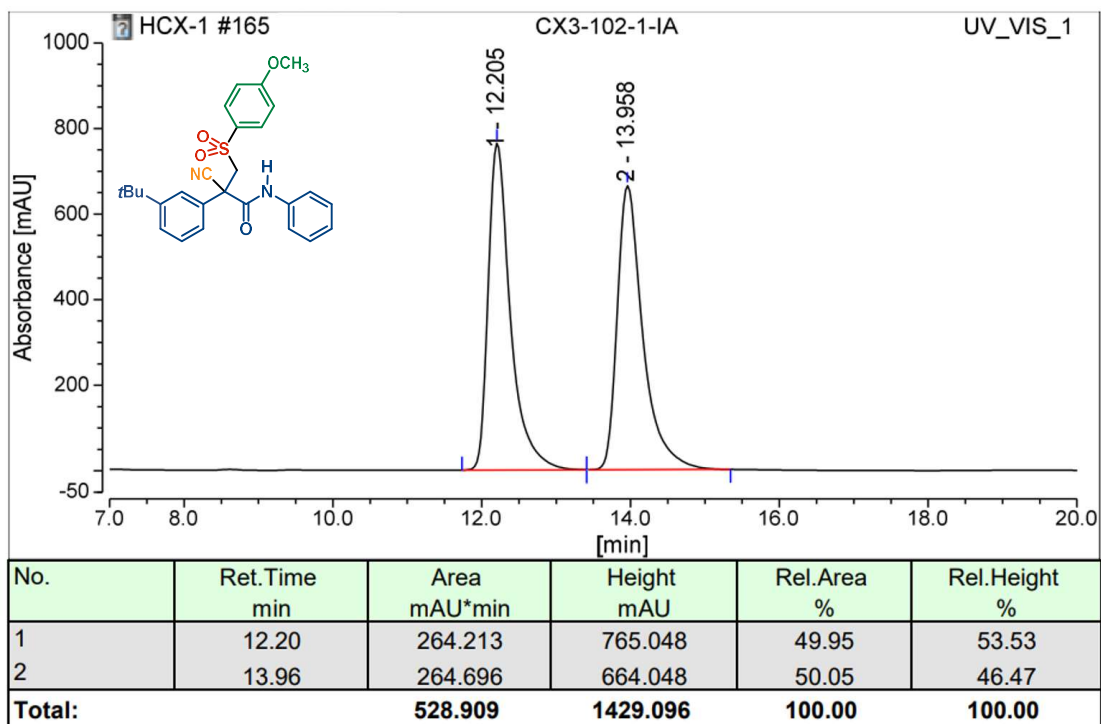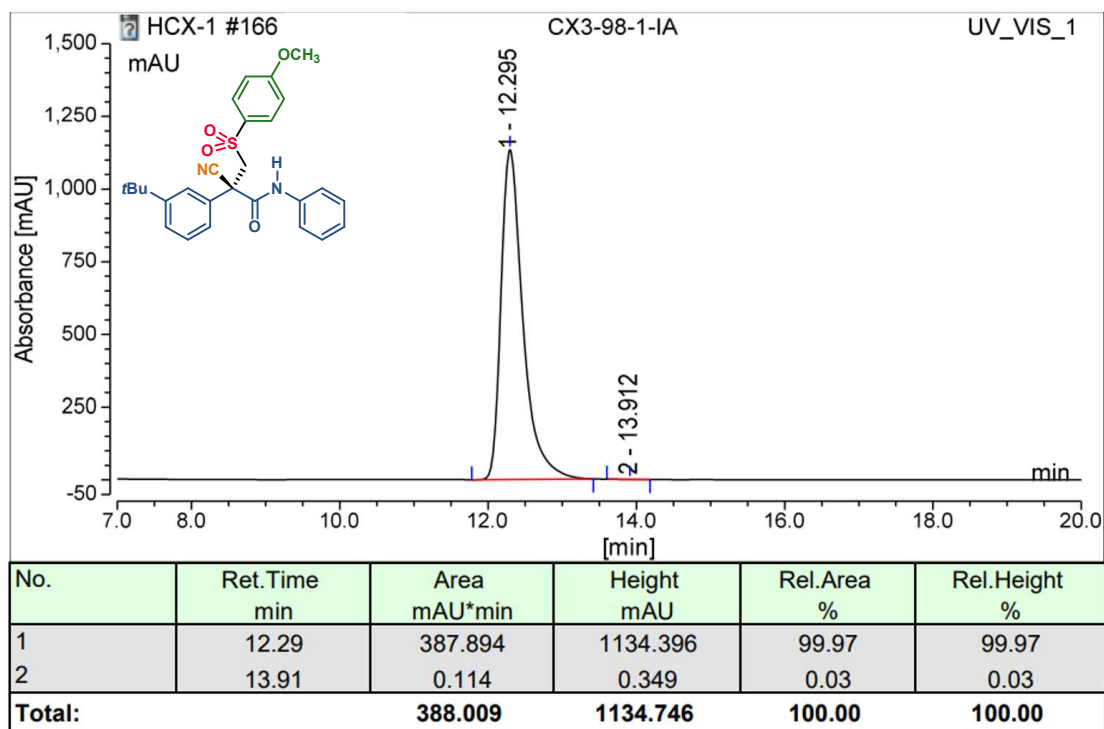

### HPLC chromatograms of Compound of 3t

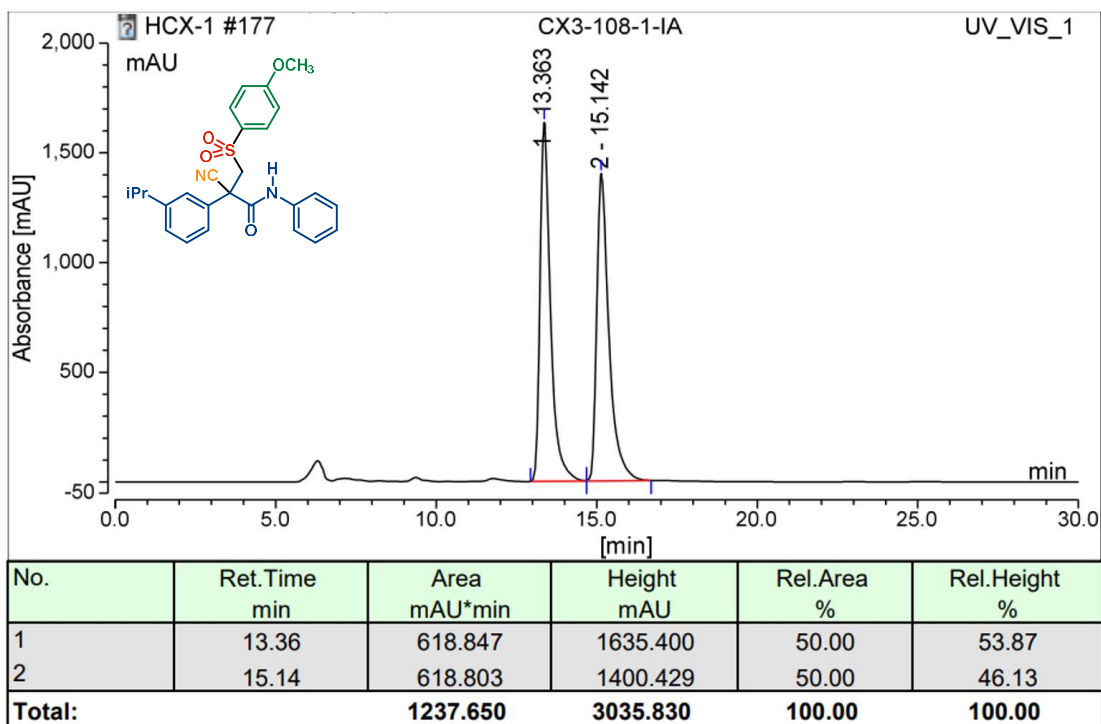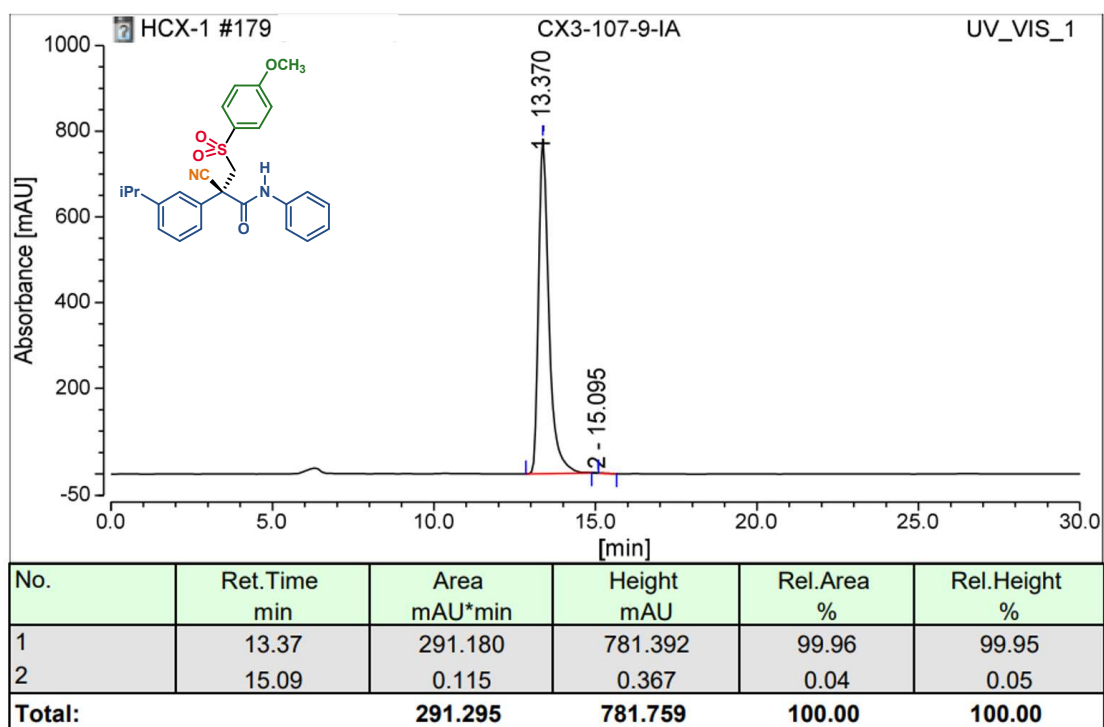

### HPLC chromatograms of Compound of 3u

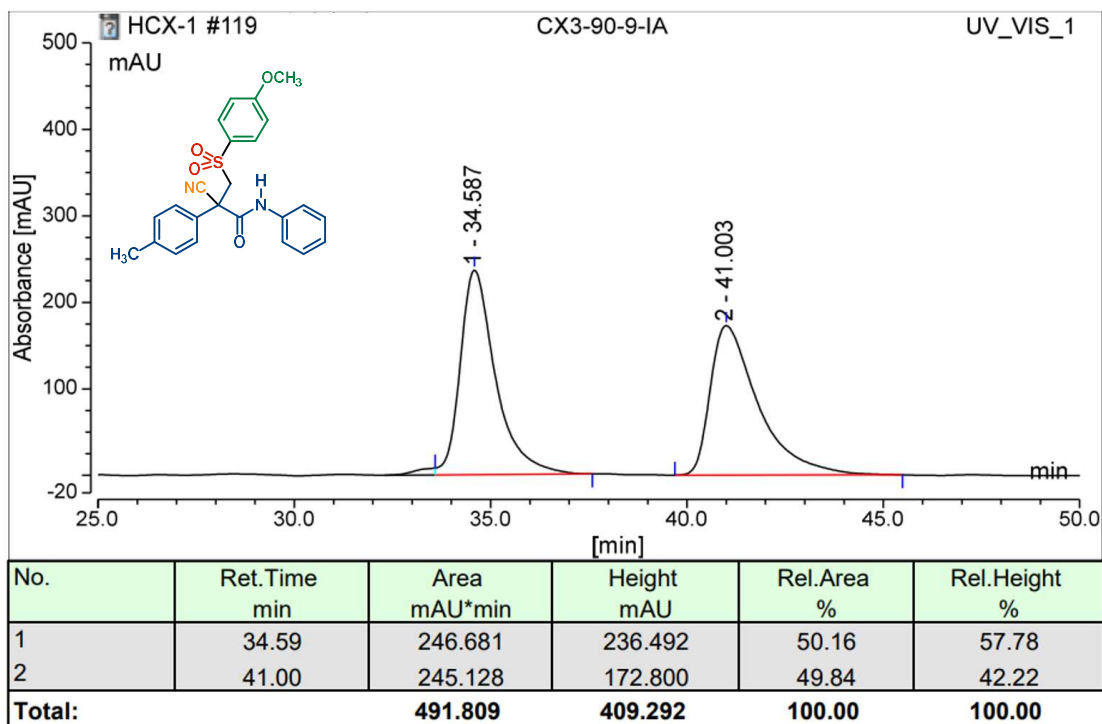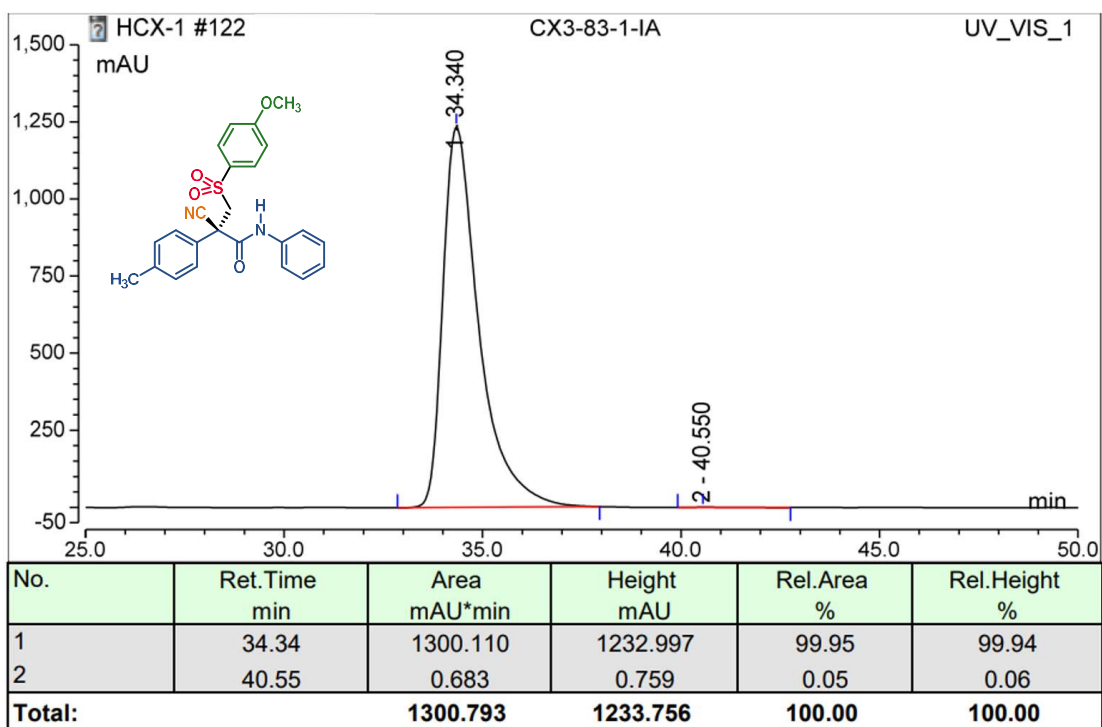

### HPLC chromatograms of Compound of 3v

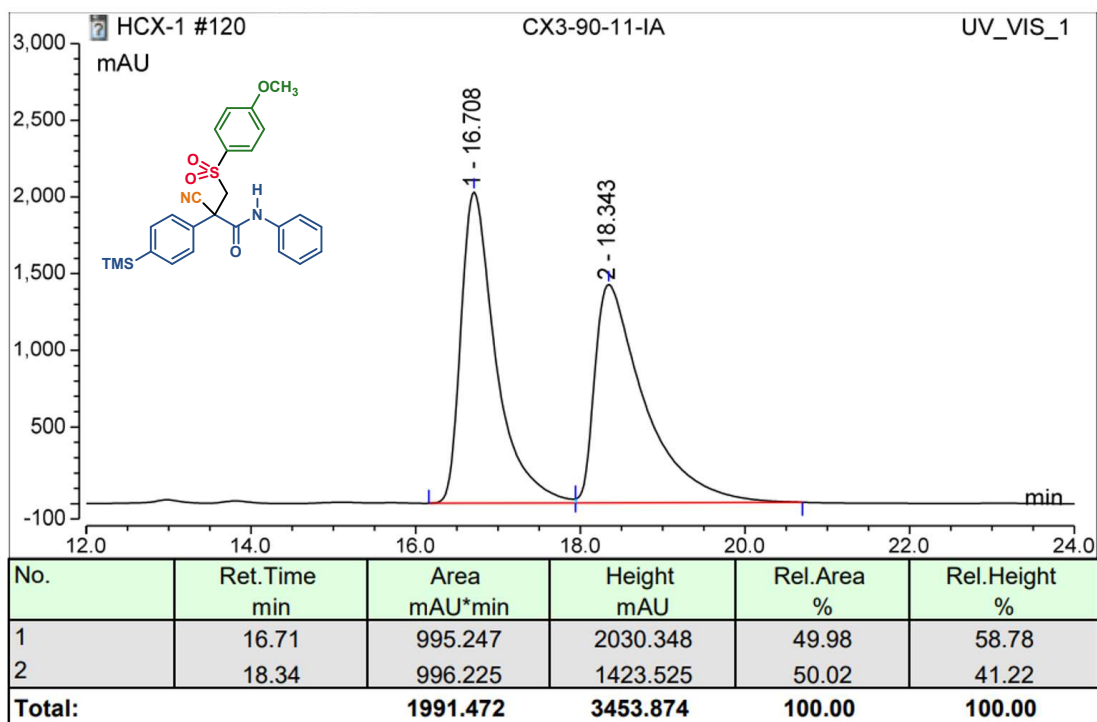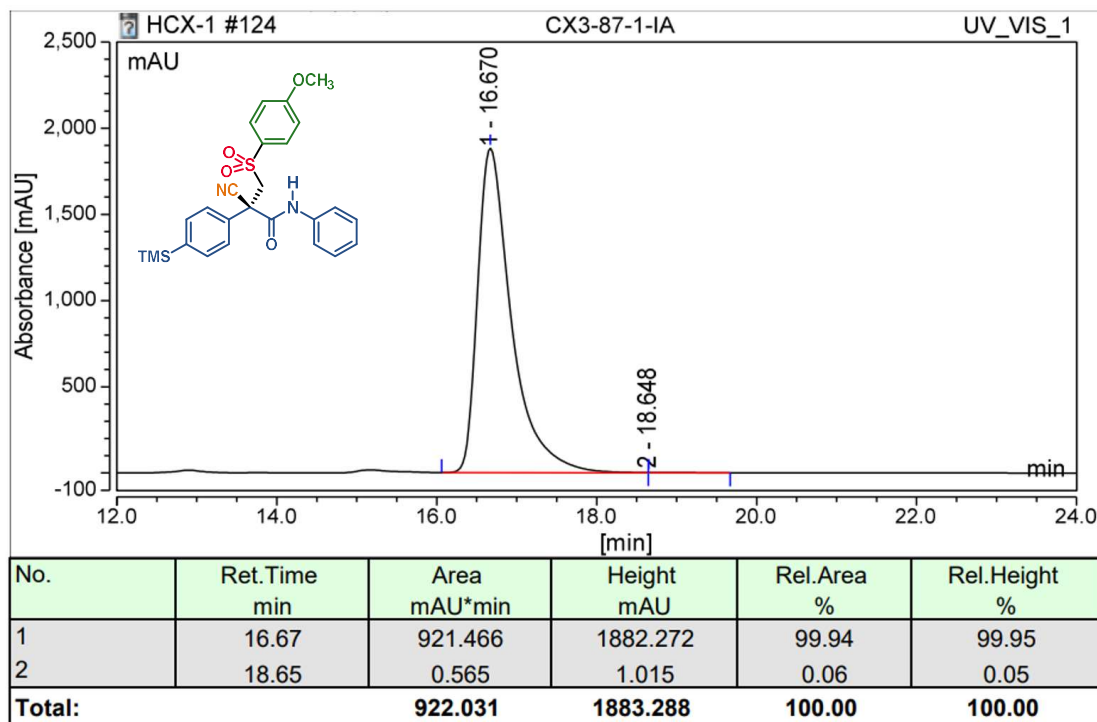

### HPLC chromatograms of Compound of 3w

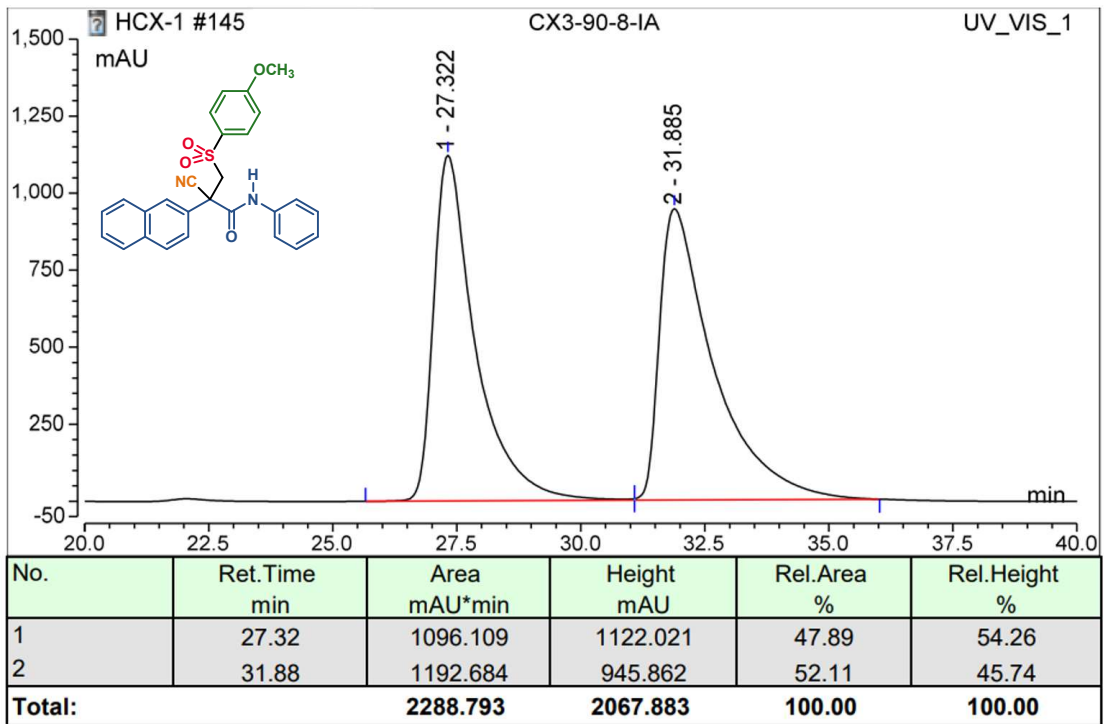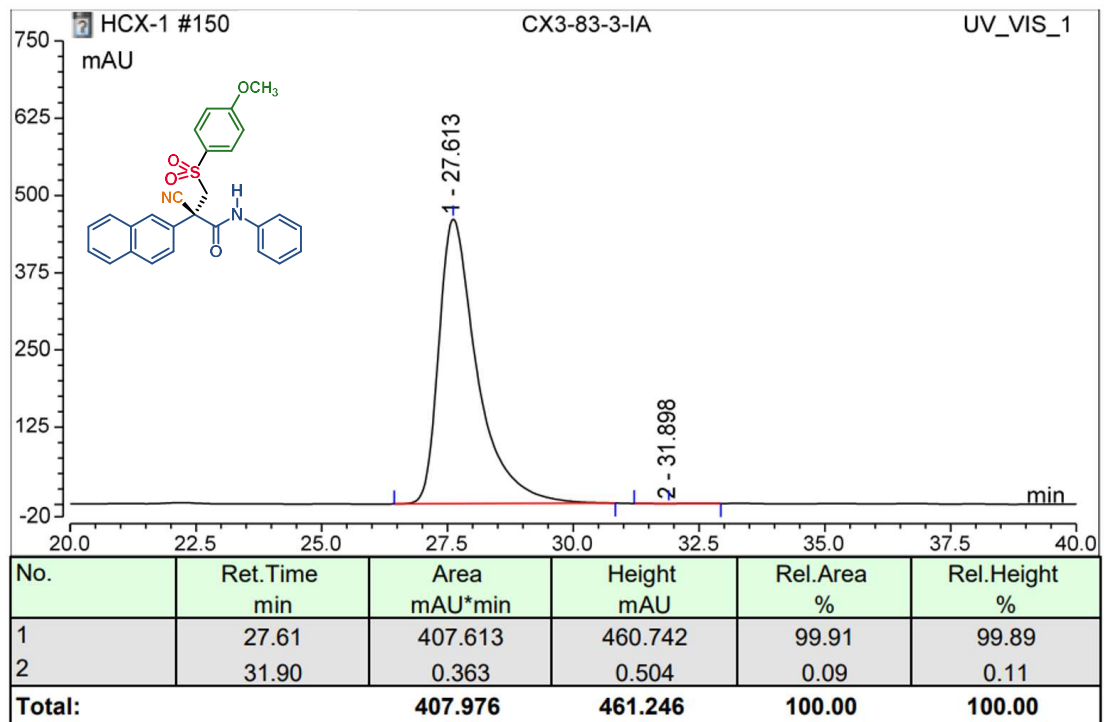

### HPLC chromatograms of Compound of 3x

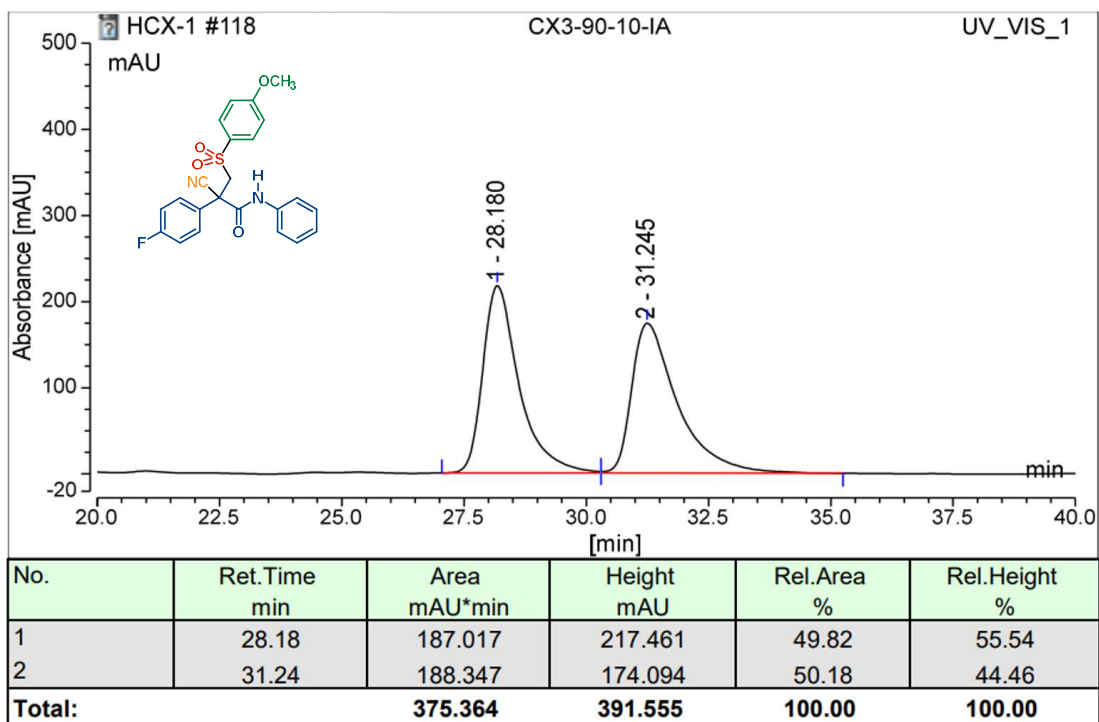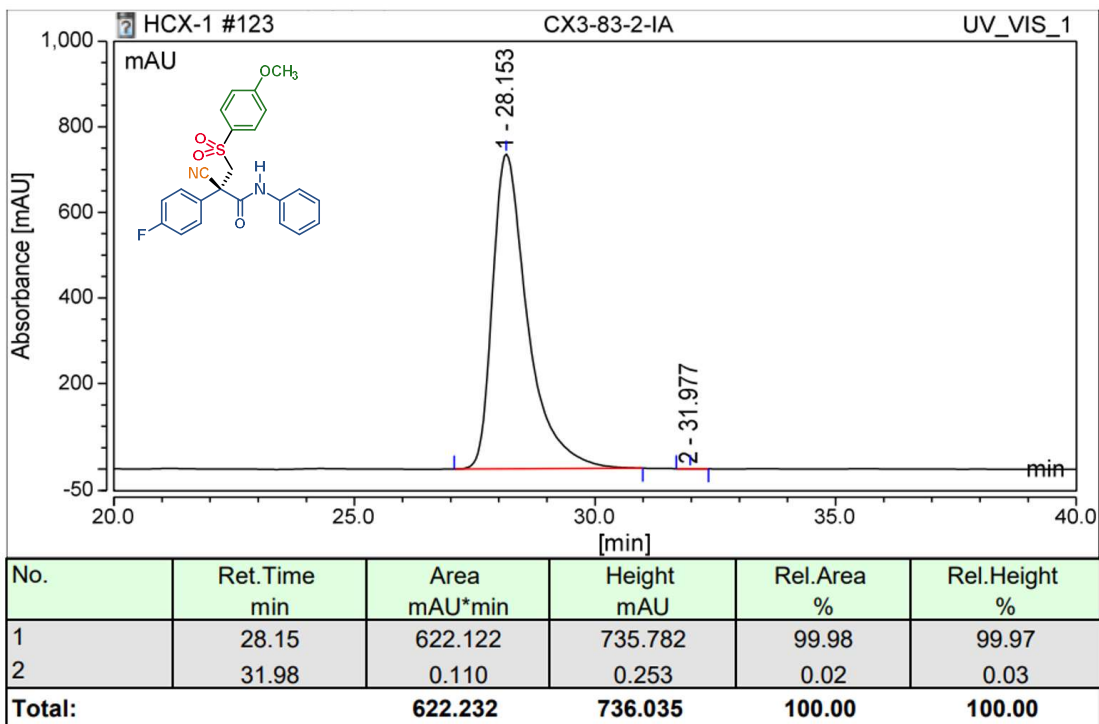

### HPLC chromatograms of Compound of 3y

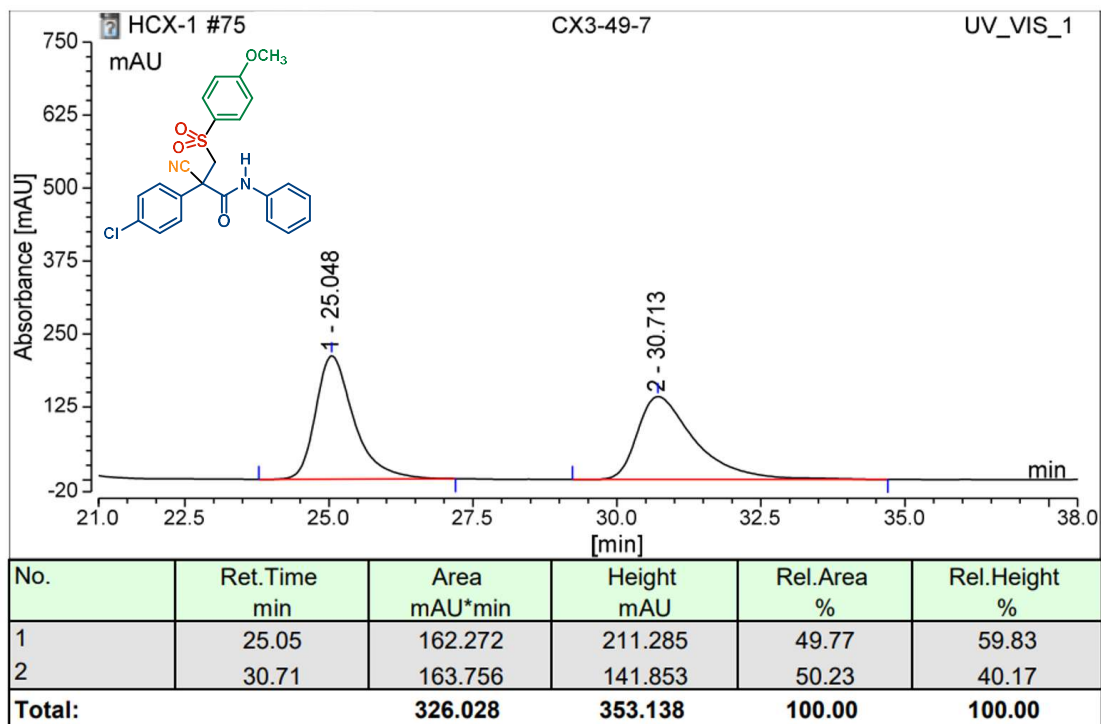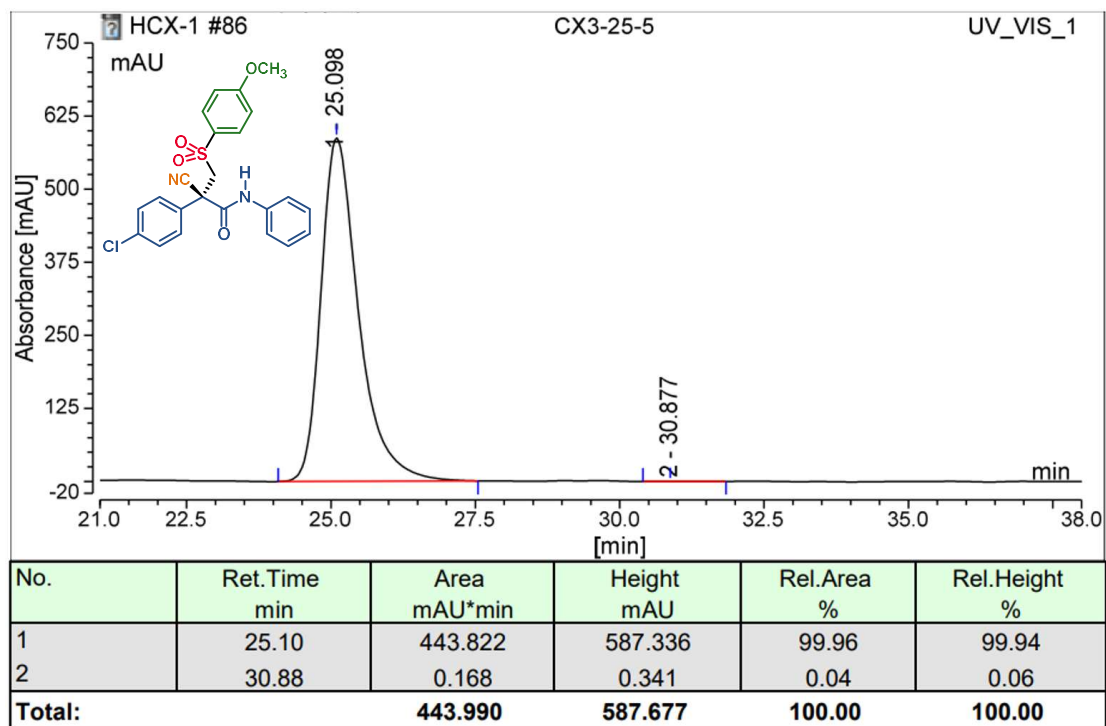

### HPLC chromatograms of Compound of 3z

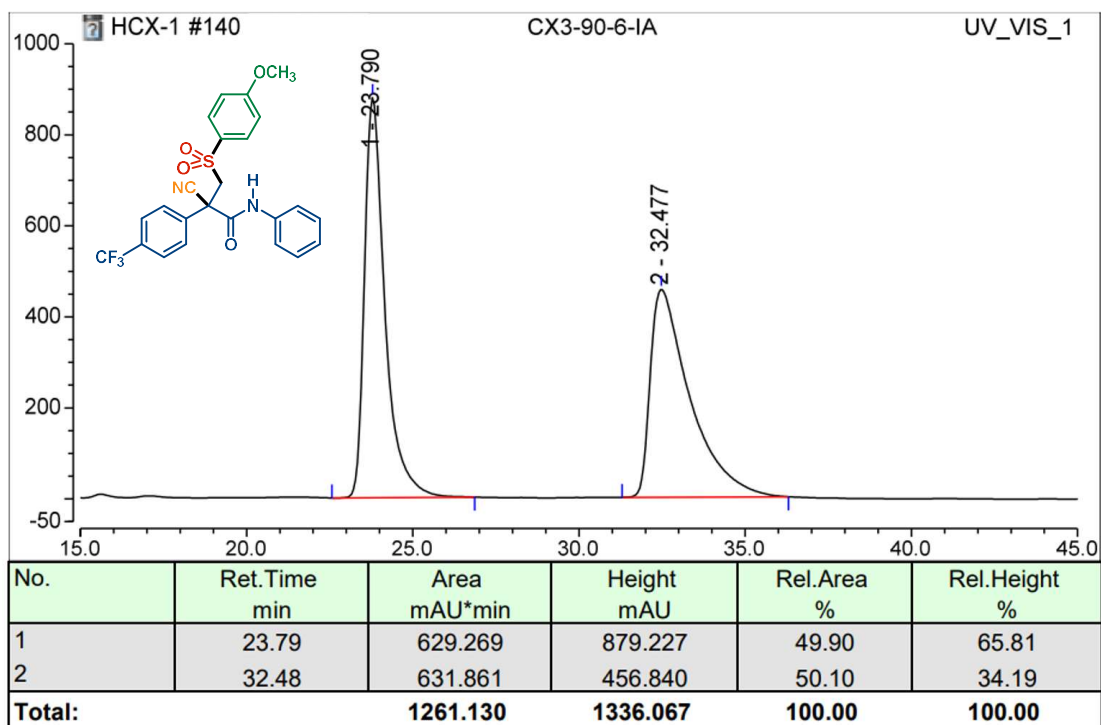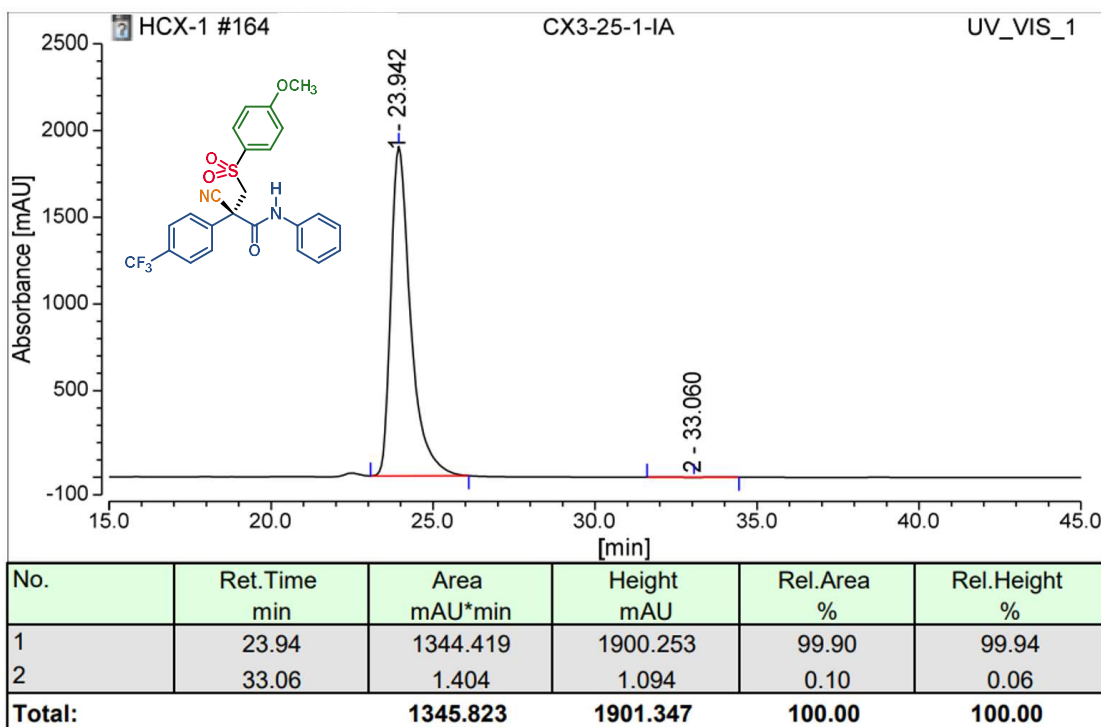



### HPLC chromatograms of Compound of 3aa

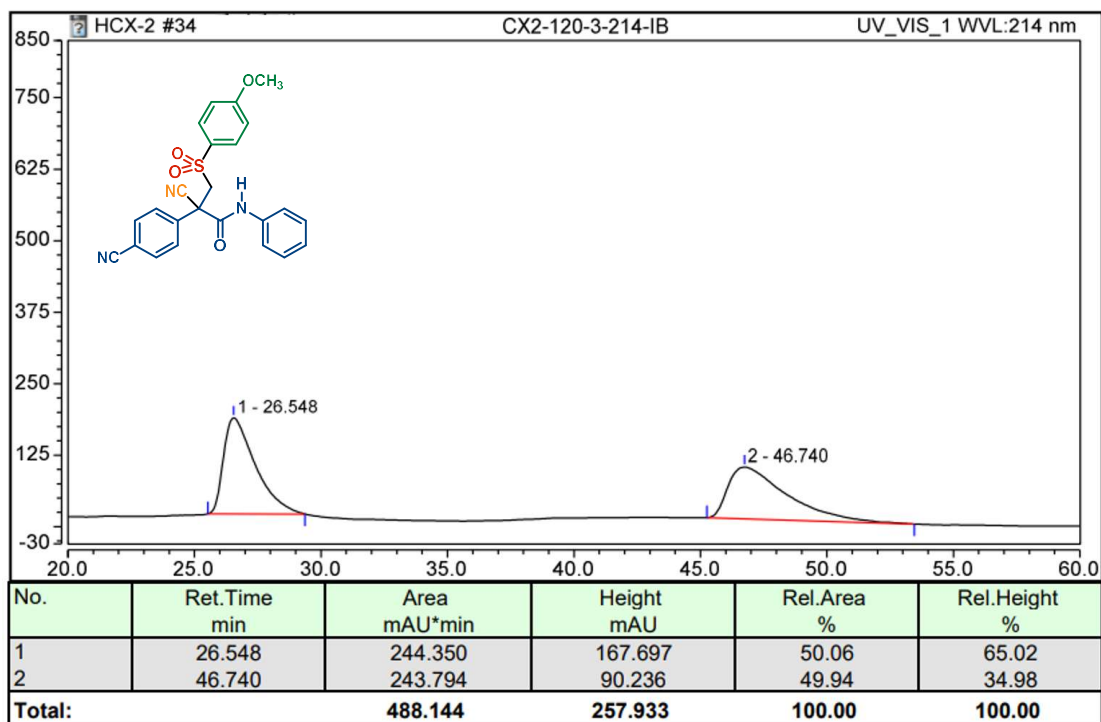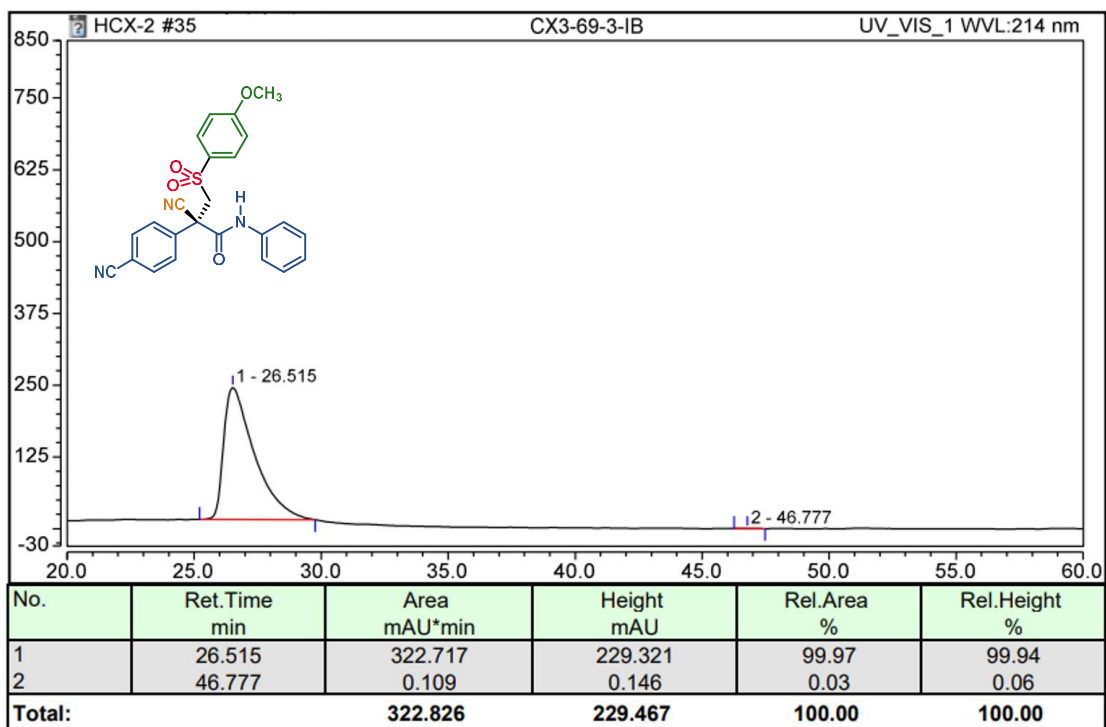

### HPLC chromatograms of Compound of 3ab

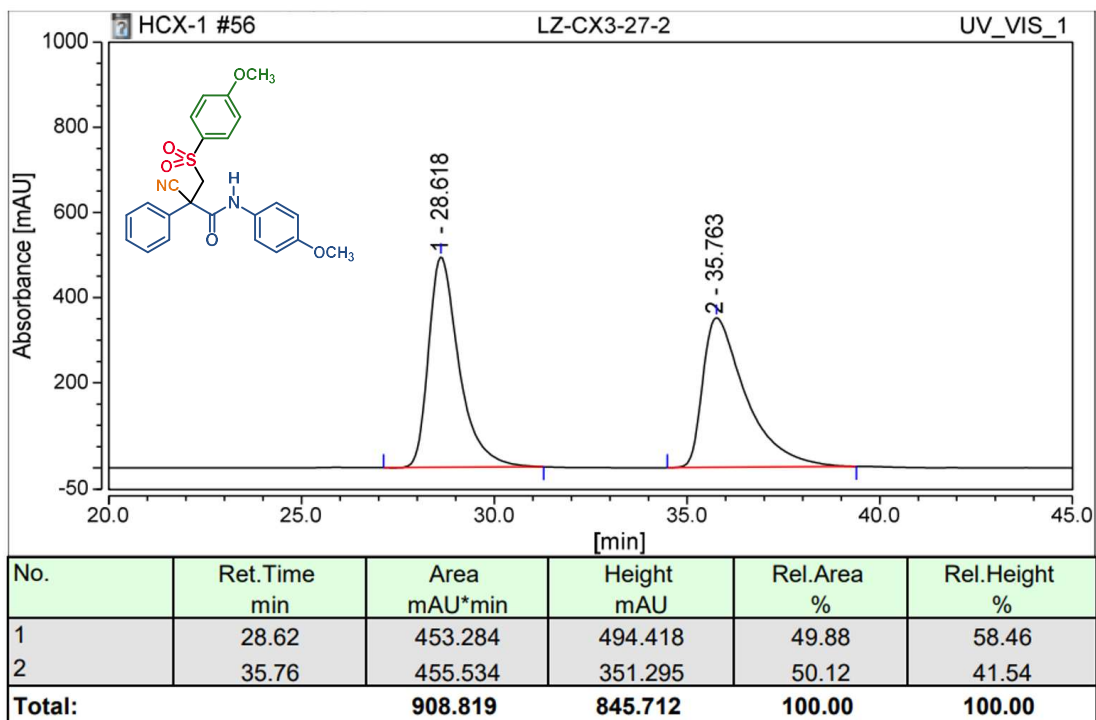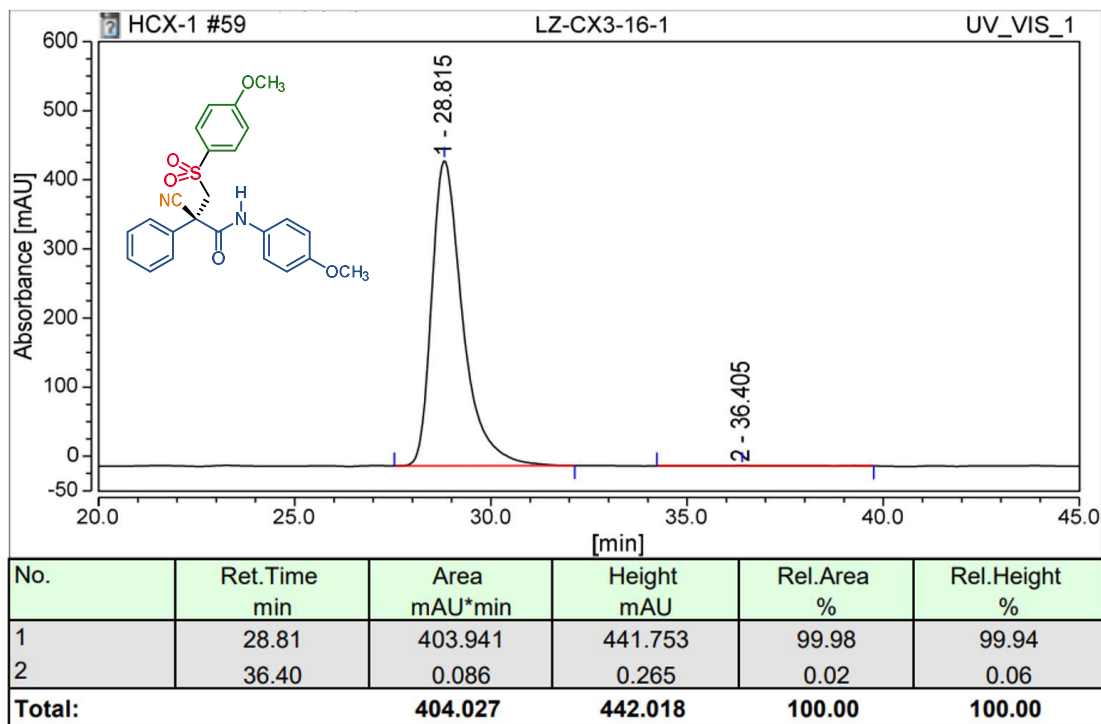

### HPLC chromatograms of Compound of 3ac

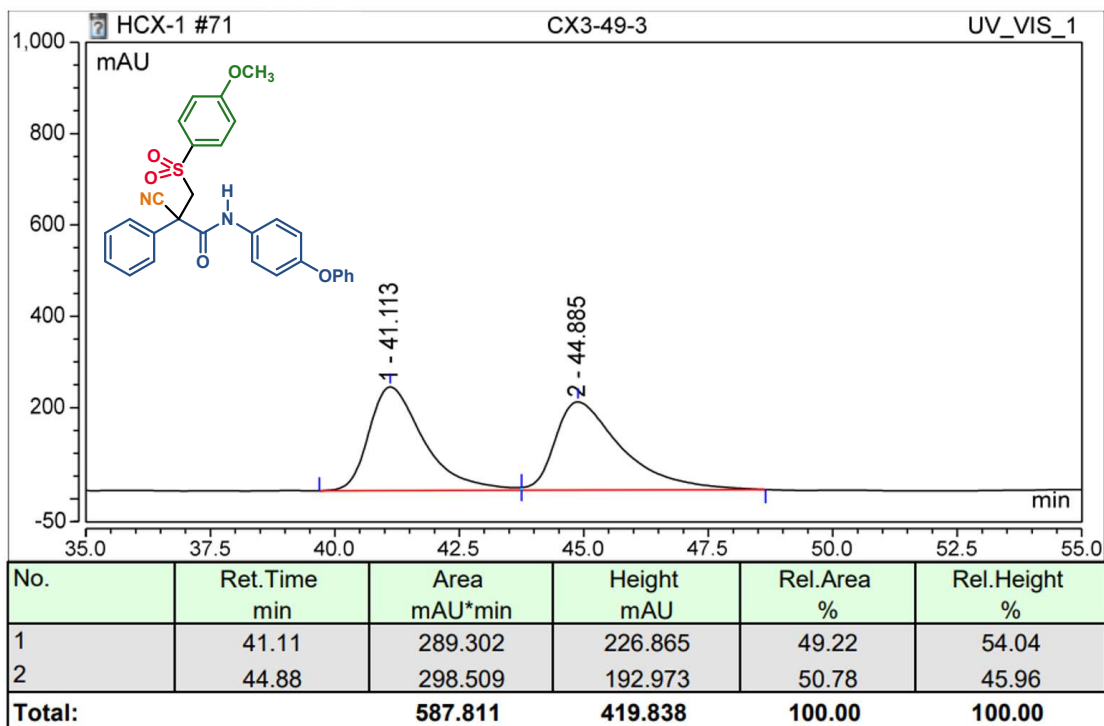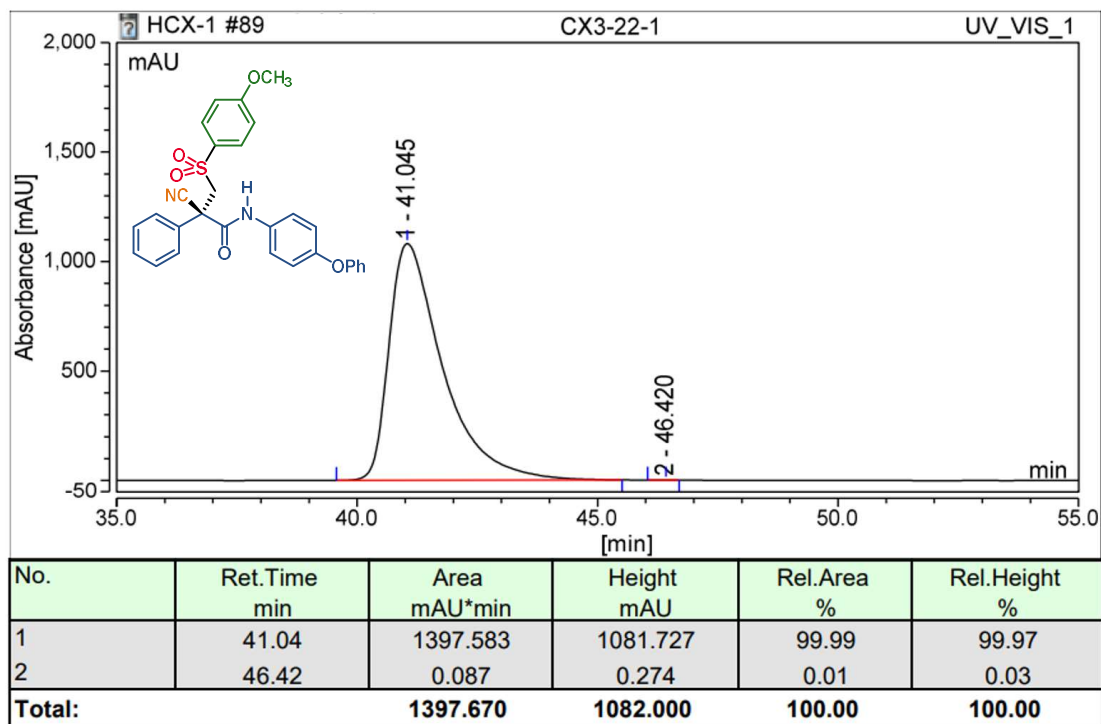

### HPLC chromatograms of Compound of 3ad

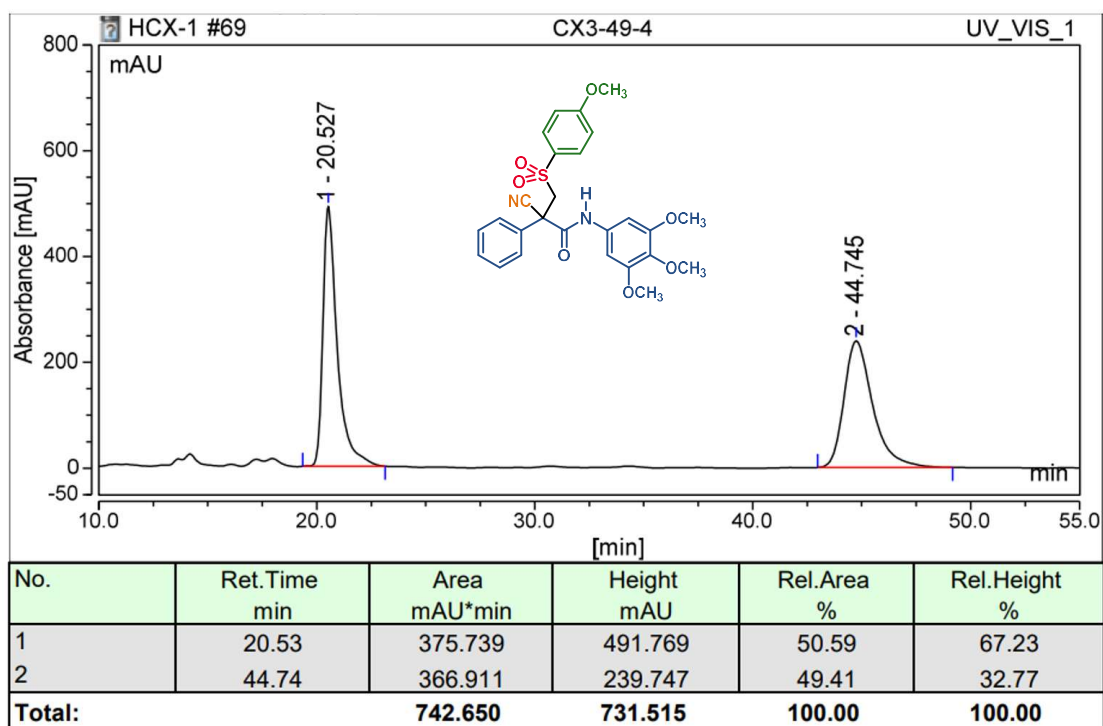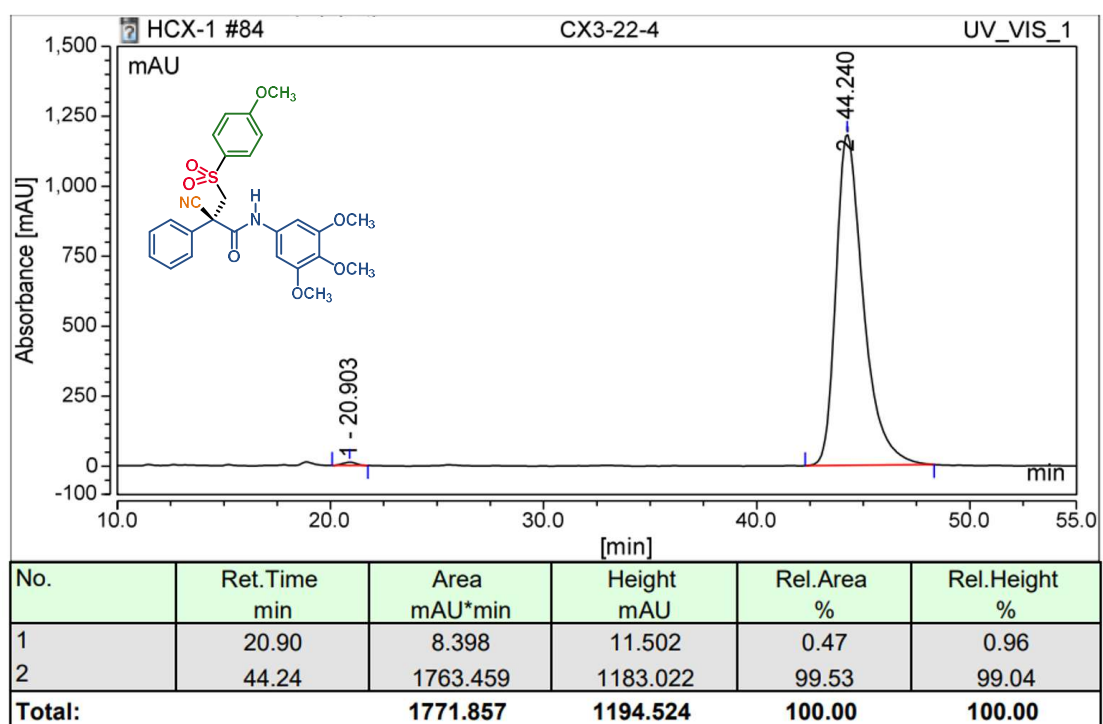

### HPLC chromatograms of Compound of 3ae

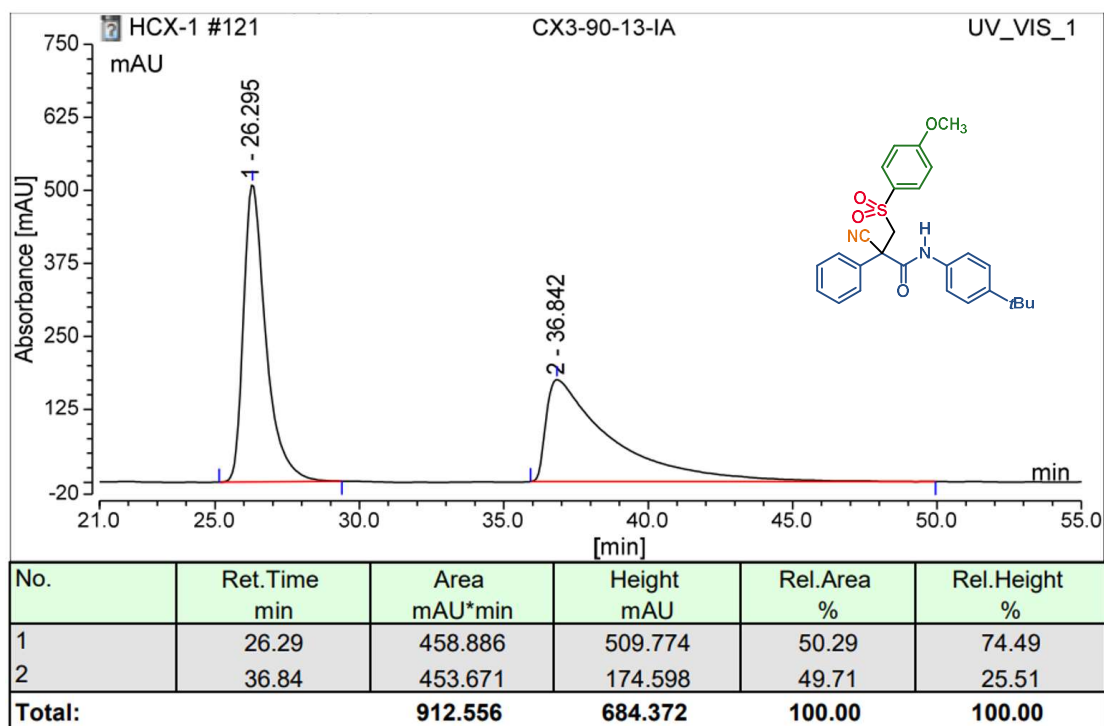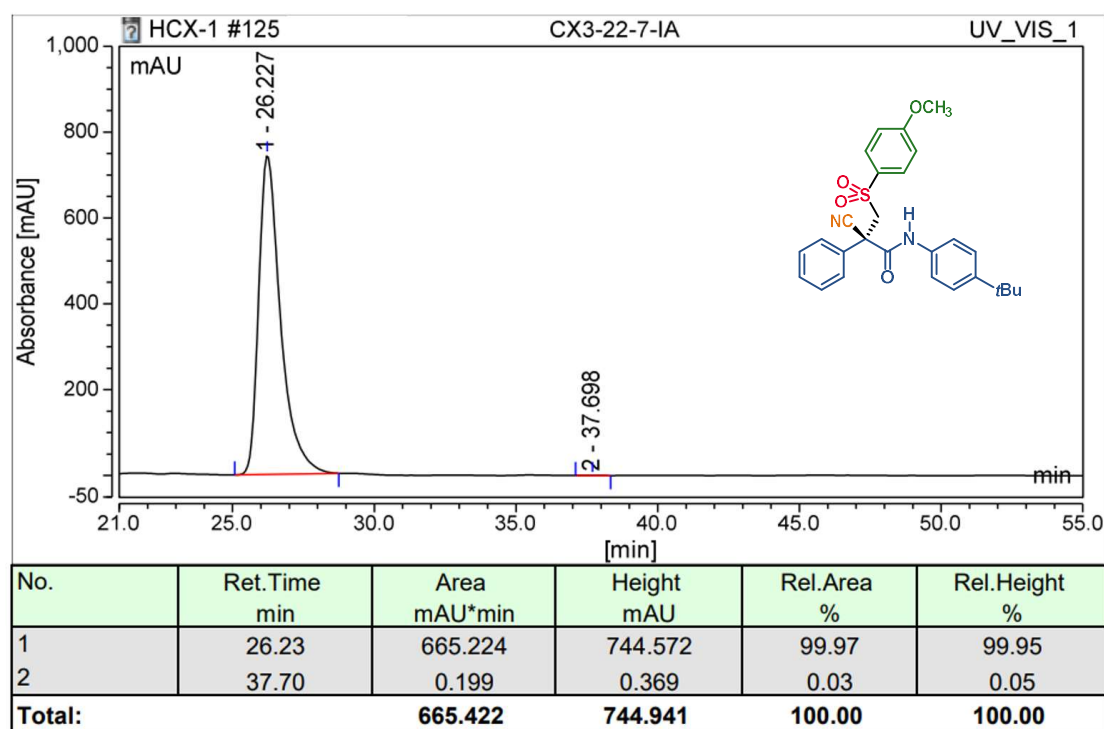

### HPLC chromatograms of Compound of 3af

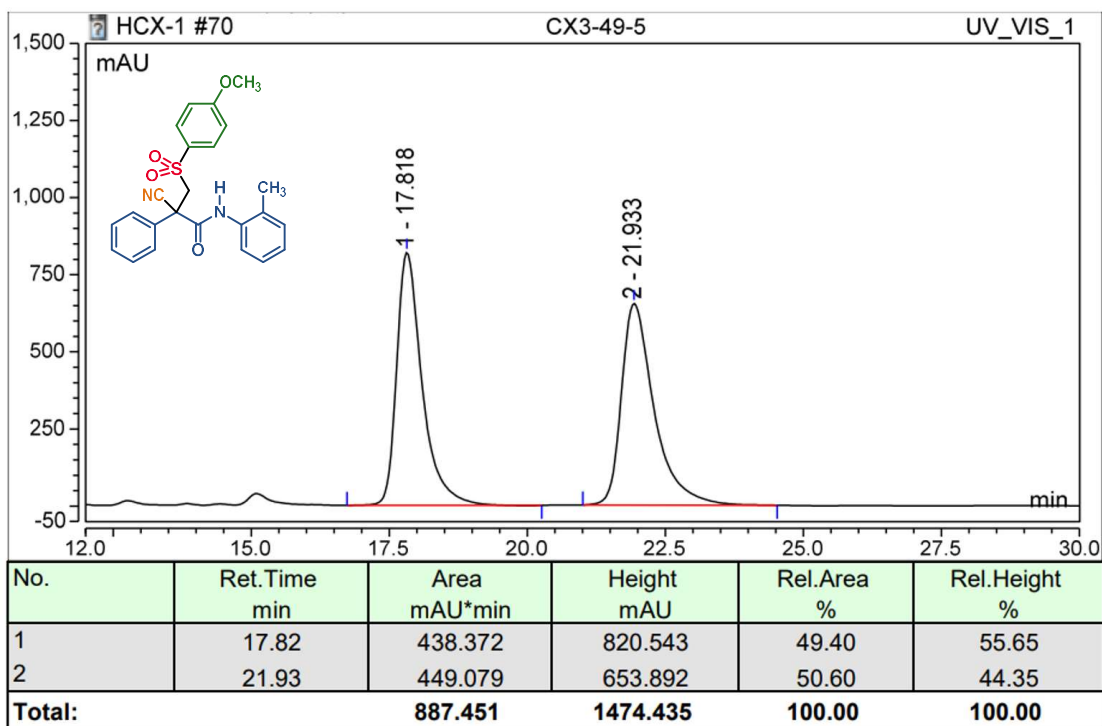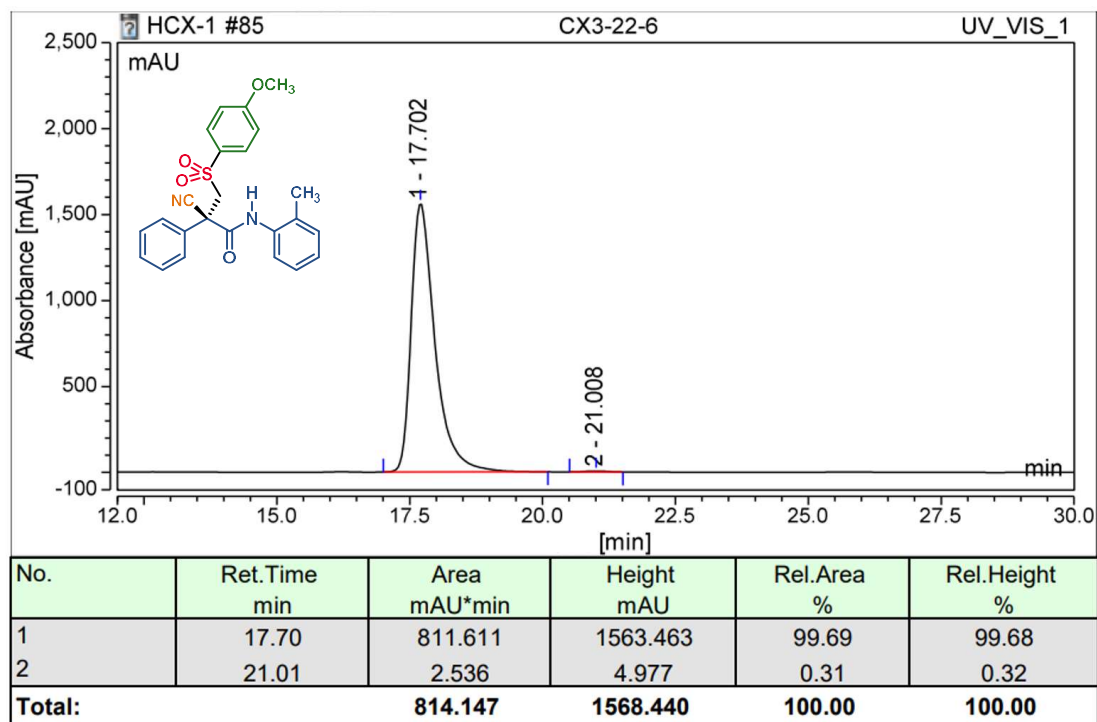

### HPLC chromatograms of Compound of 3ag

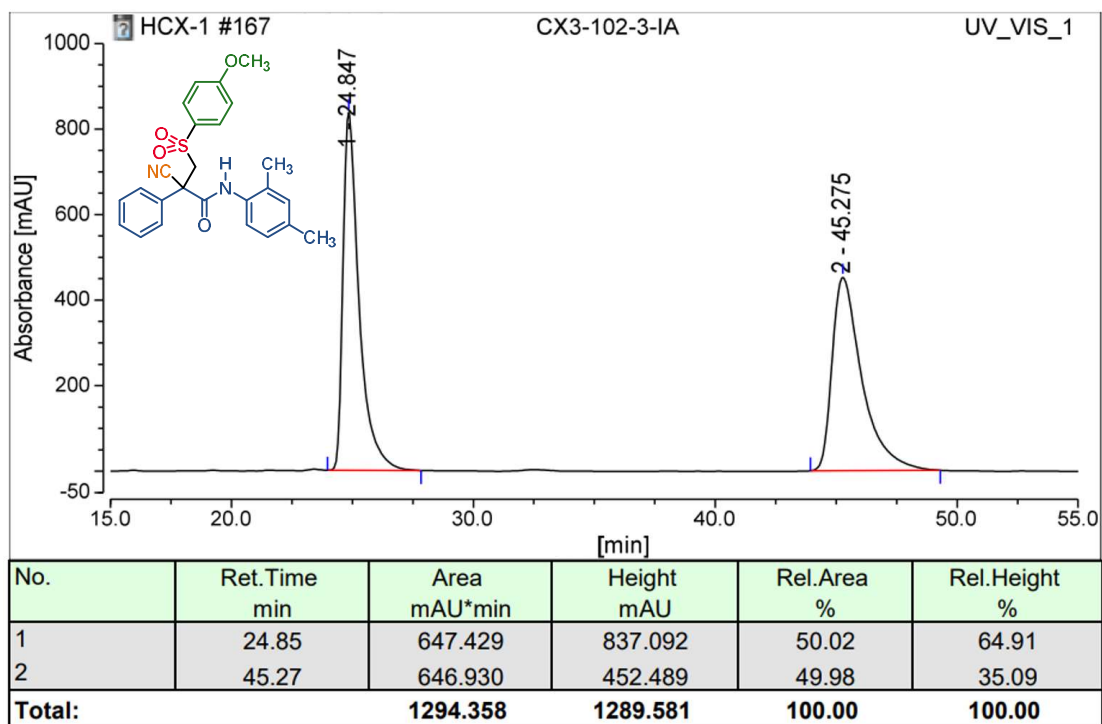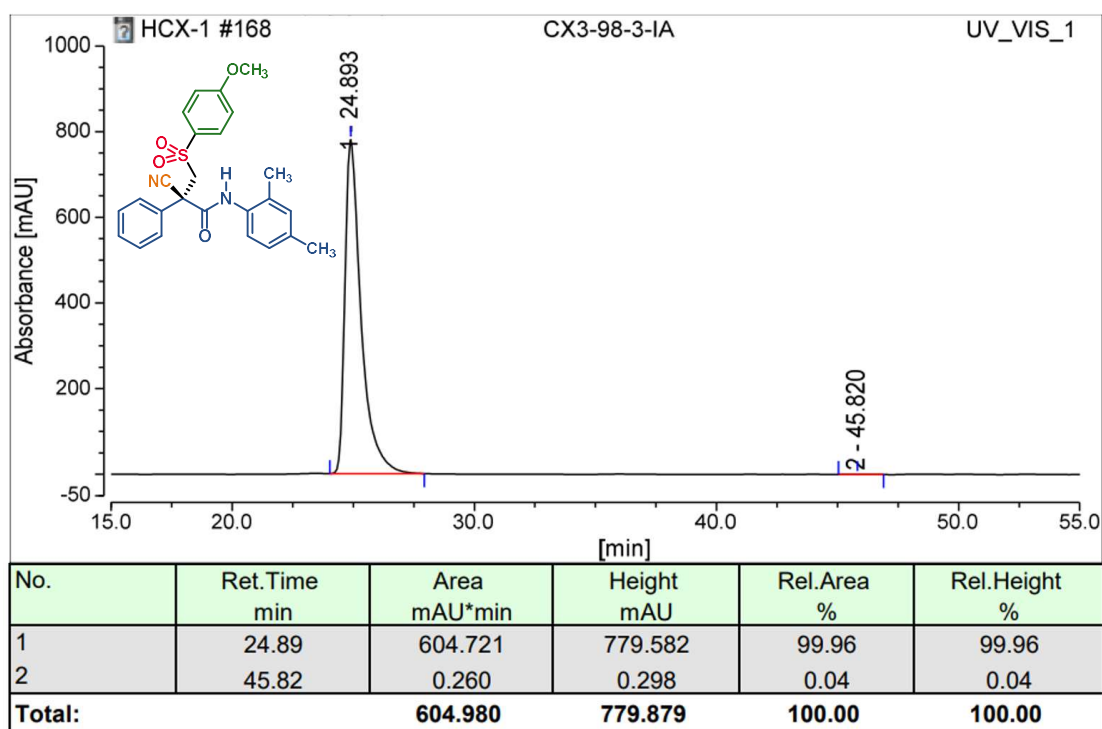

### HPLC chromatograms of Compound of 3ah

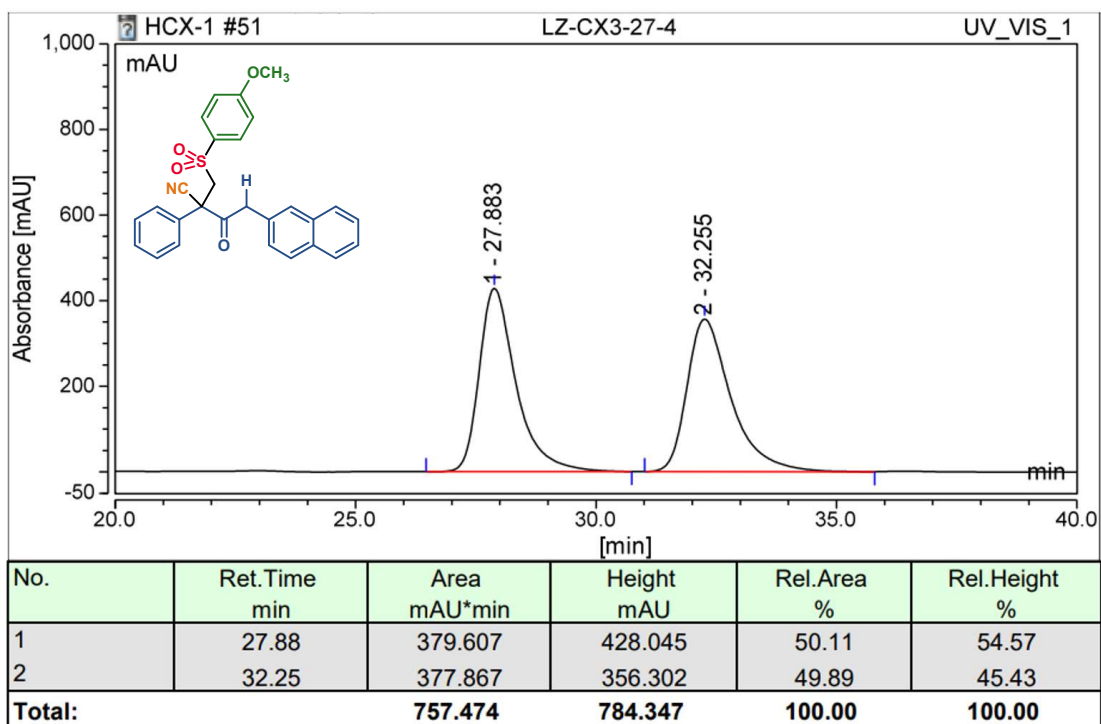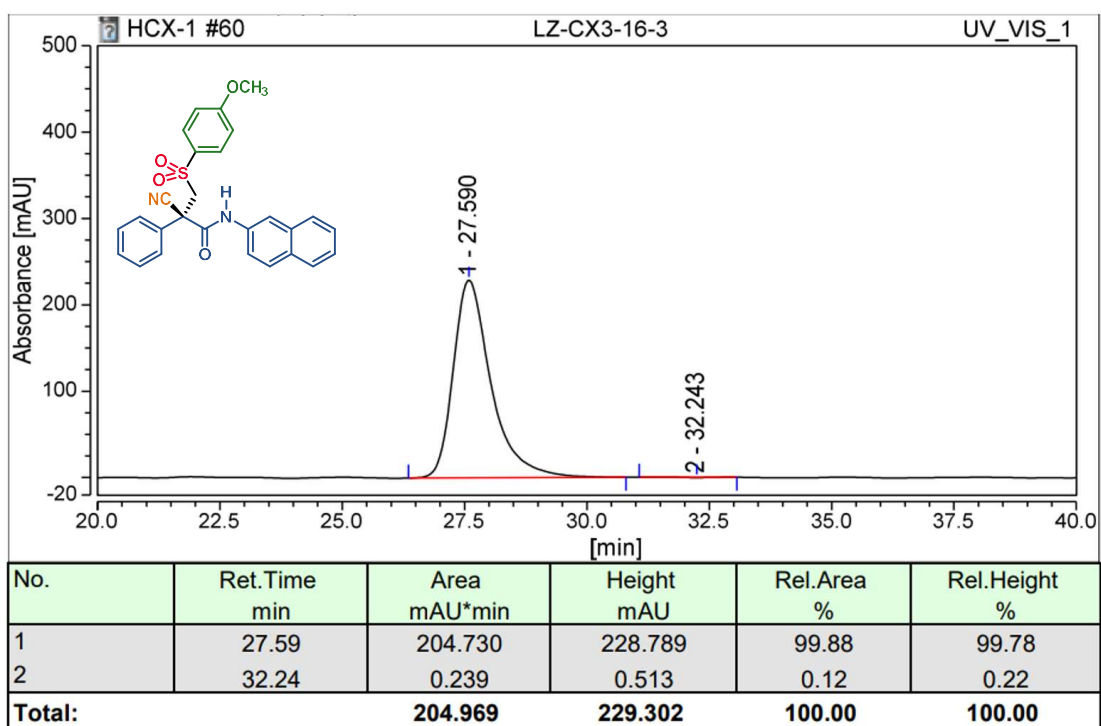



### HPLC chromatograms of Compound of 3ai

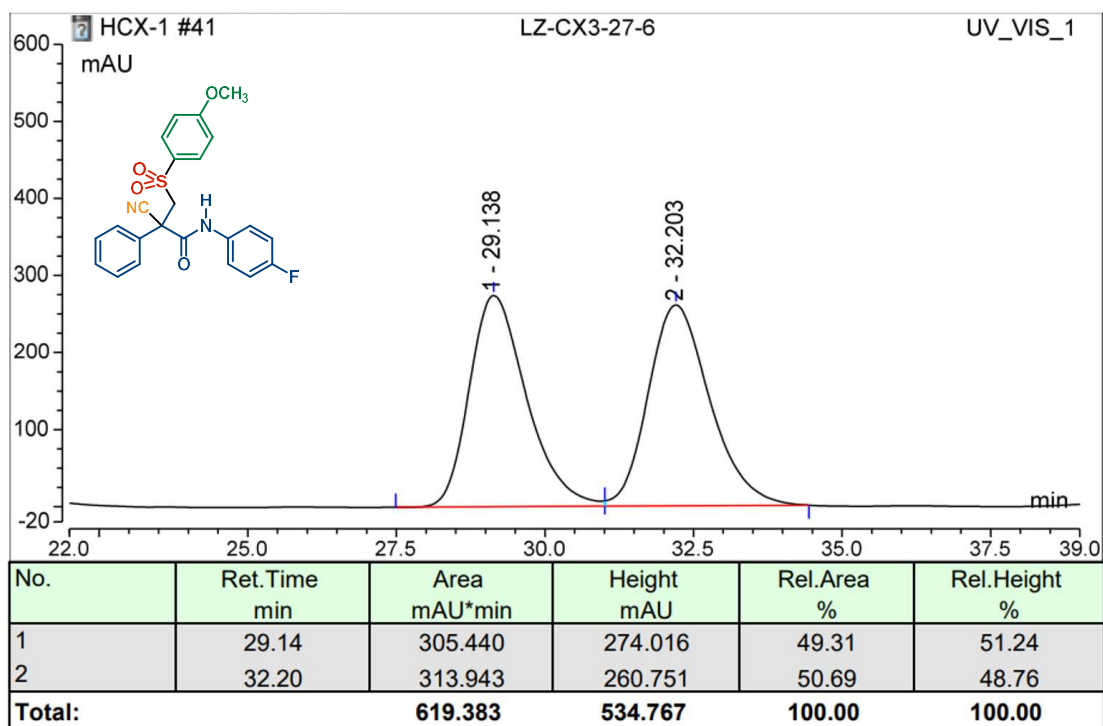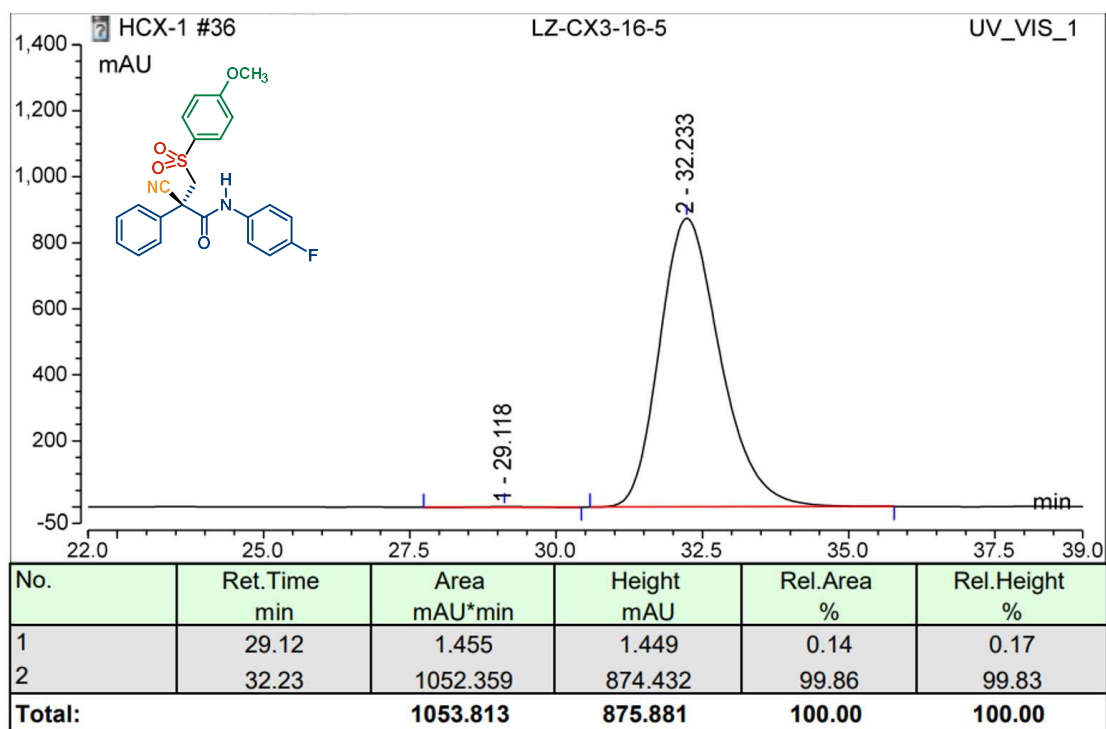

### HPLC chromatograms of Compound of 3aj

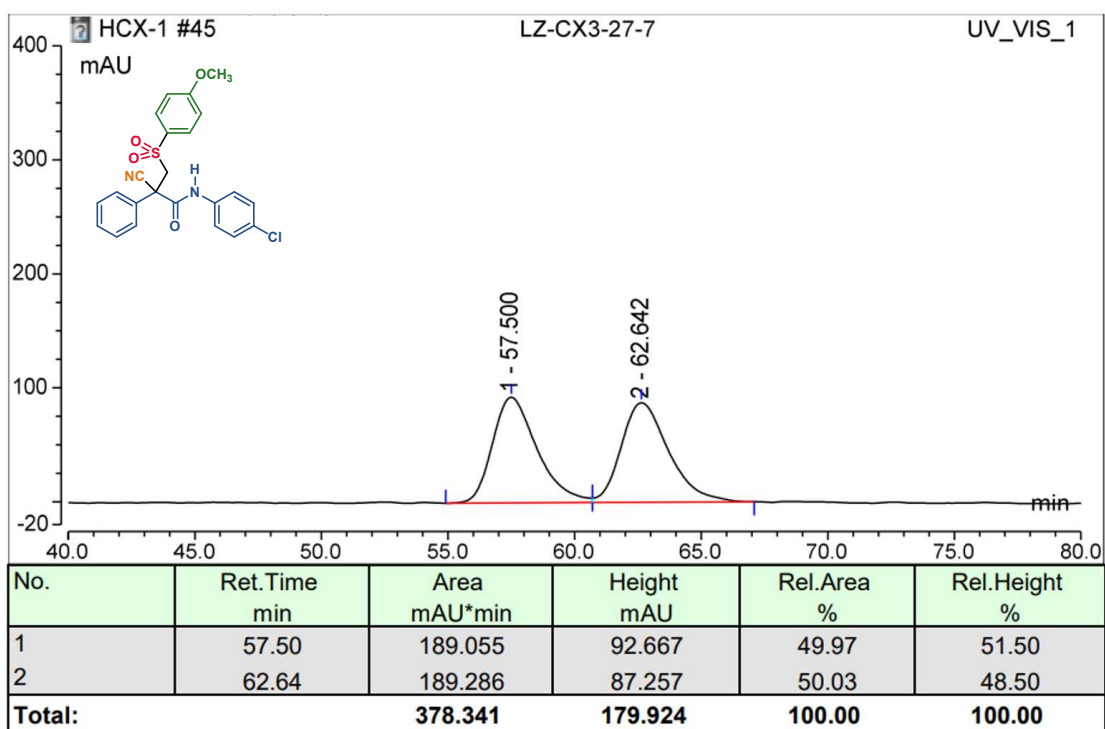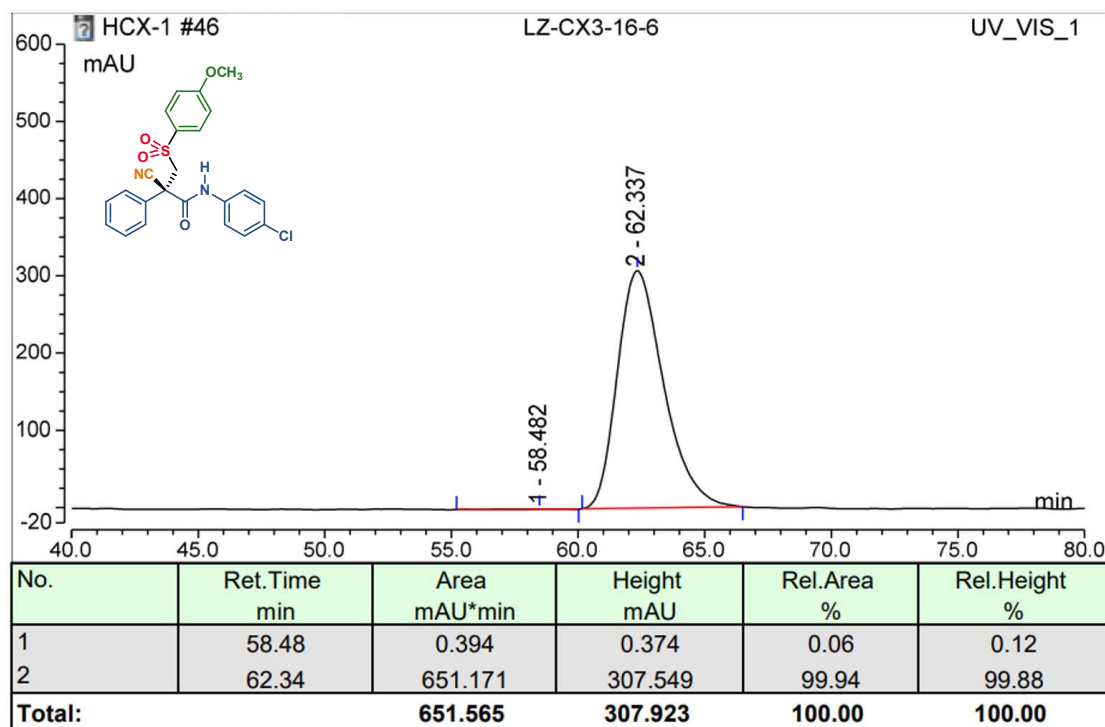

### HPLC chromatograms of Compound of 3ak

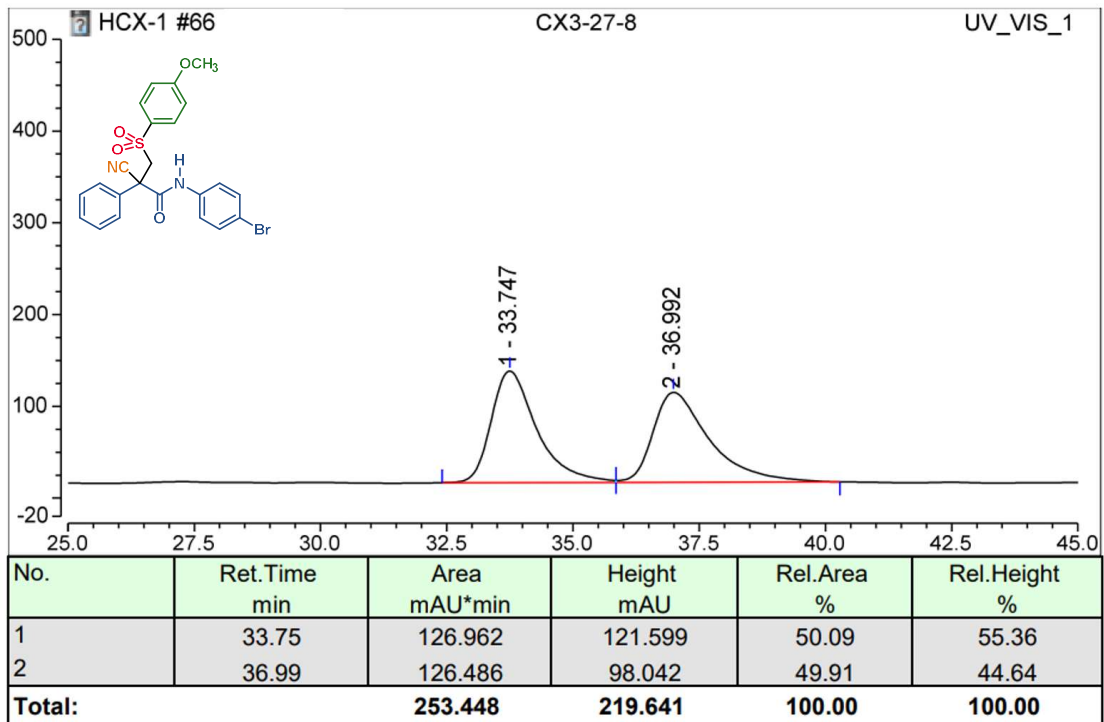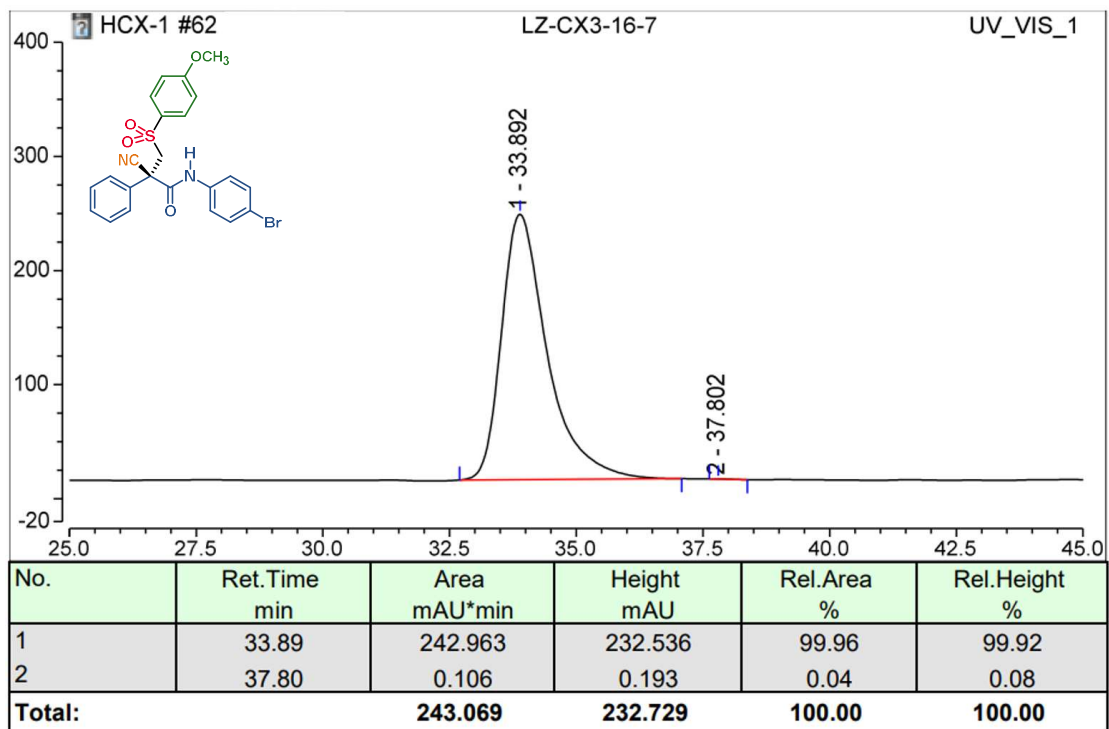

### HPLC chromatograms of Compound of 3aI

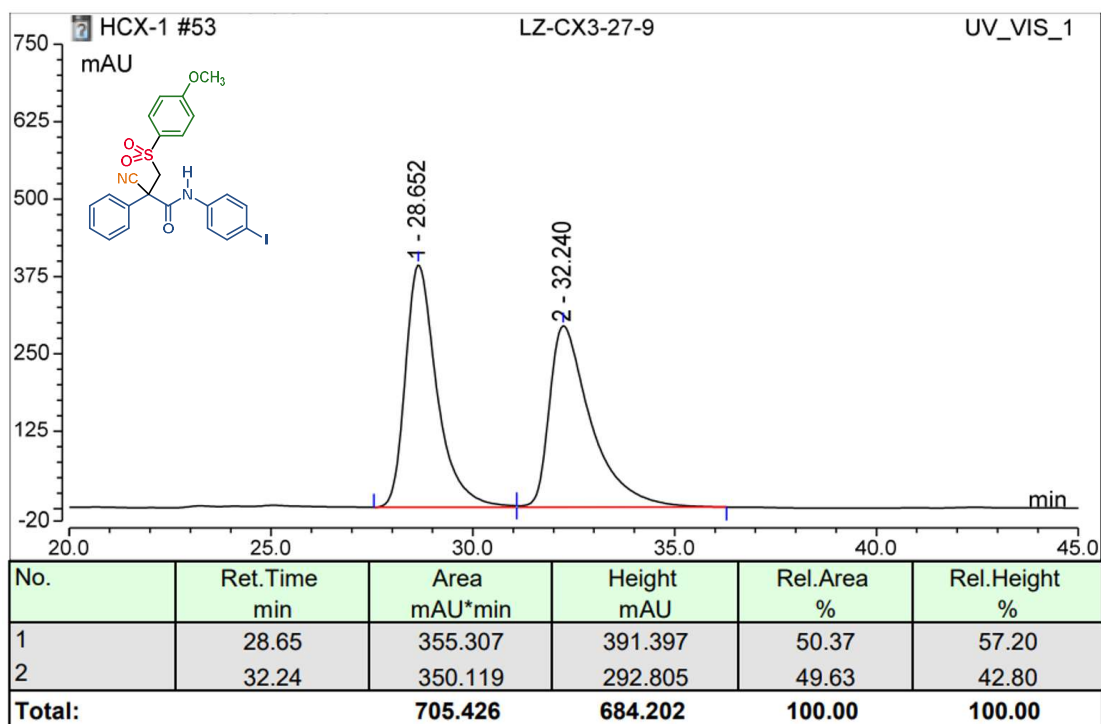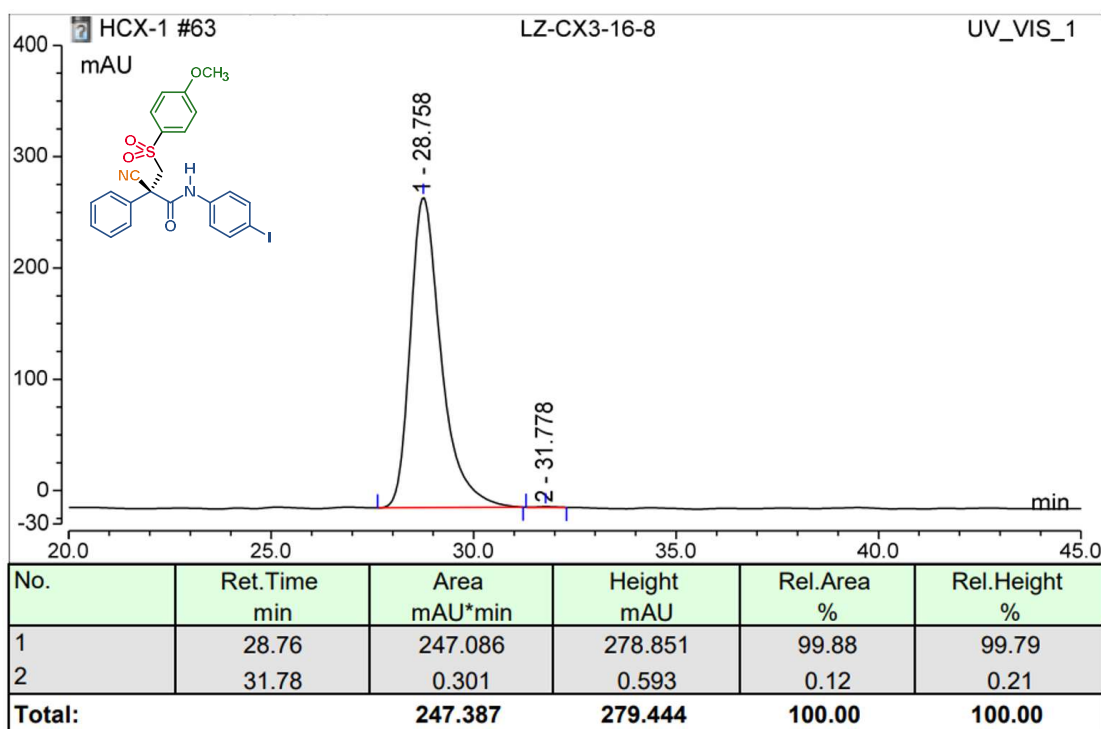

### HPLC chromatograms of Compound of 3am

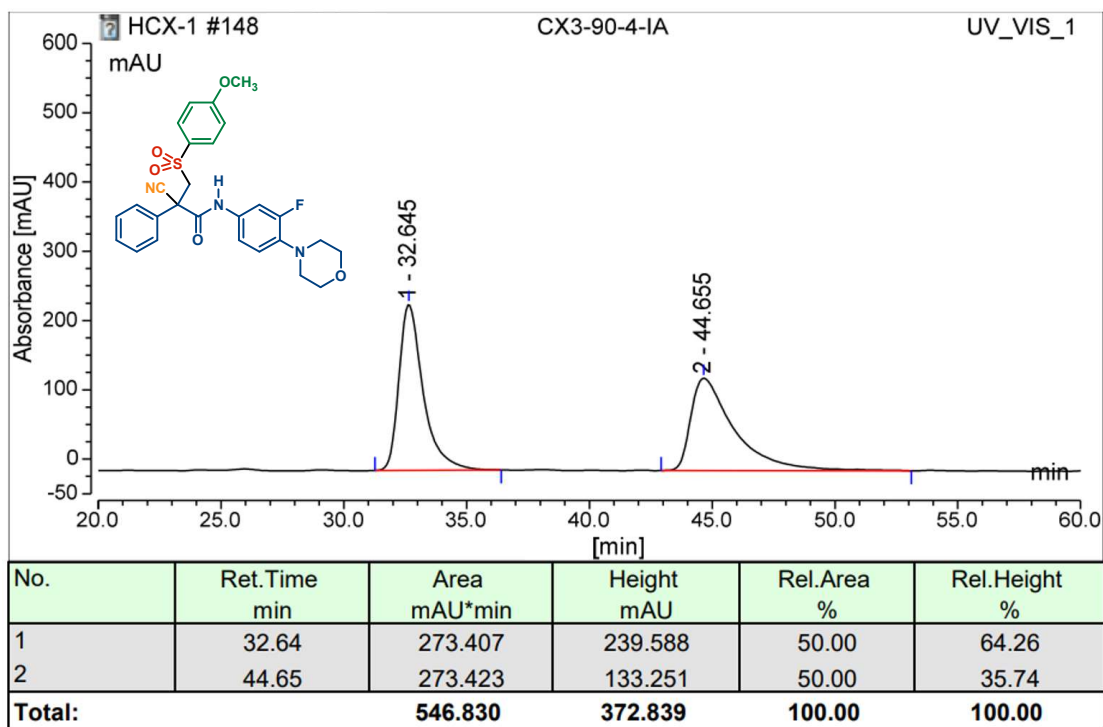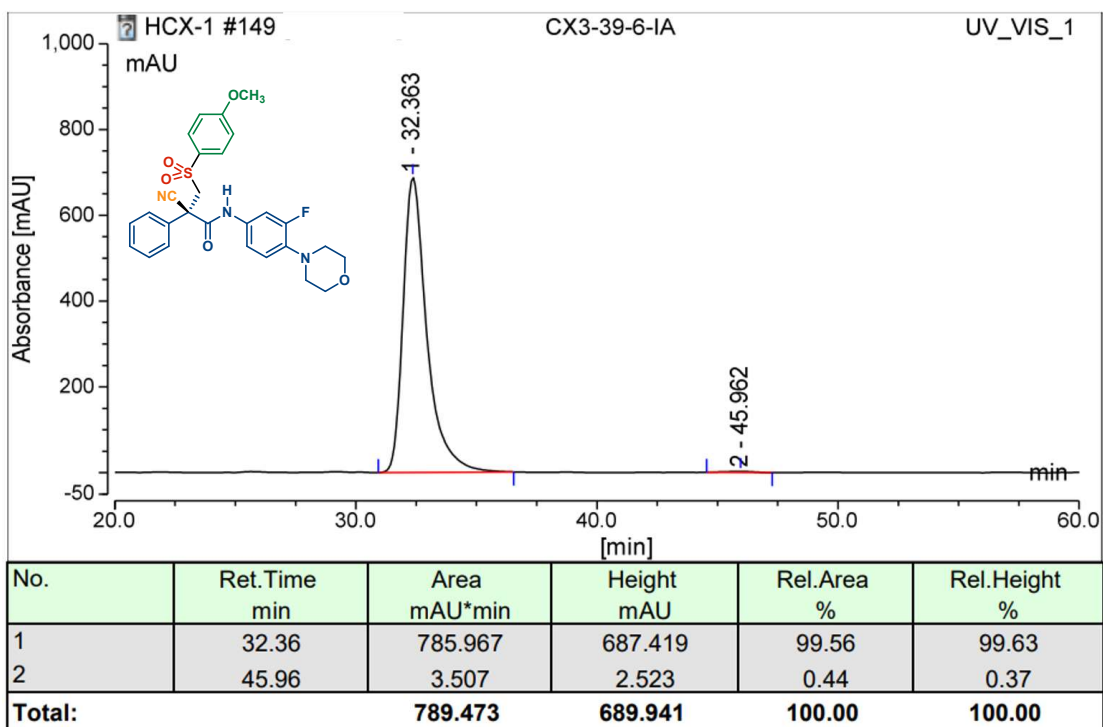

### HPLC chromatograms of Compound of 3an

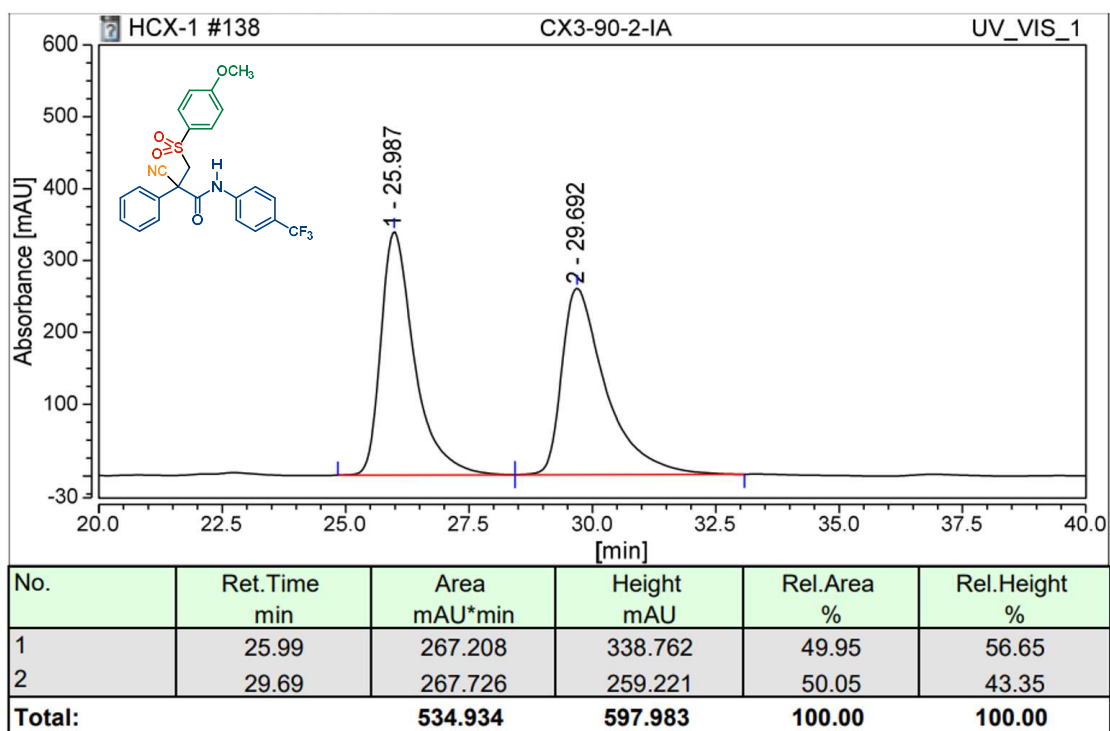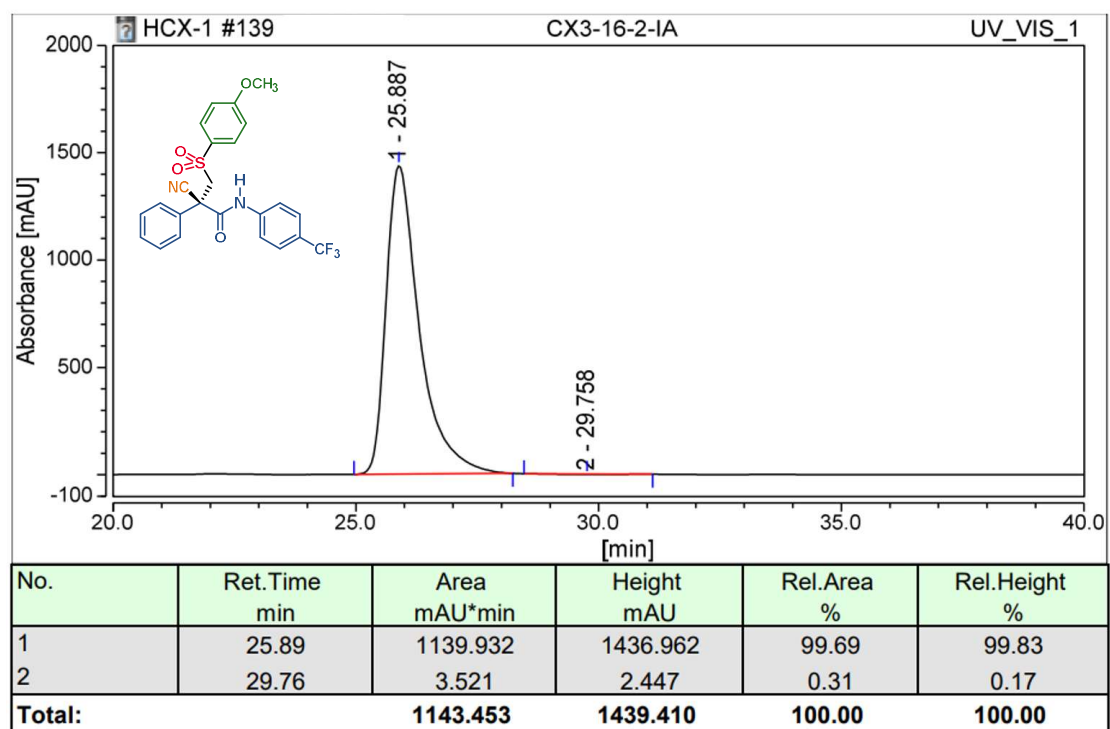

### HPLC chromatograms of Compound of 3ao

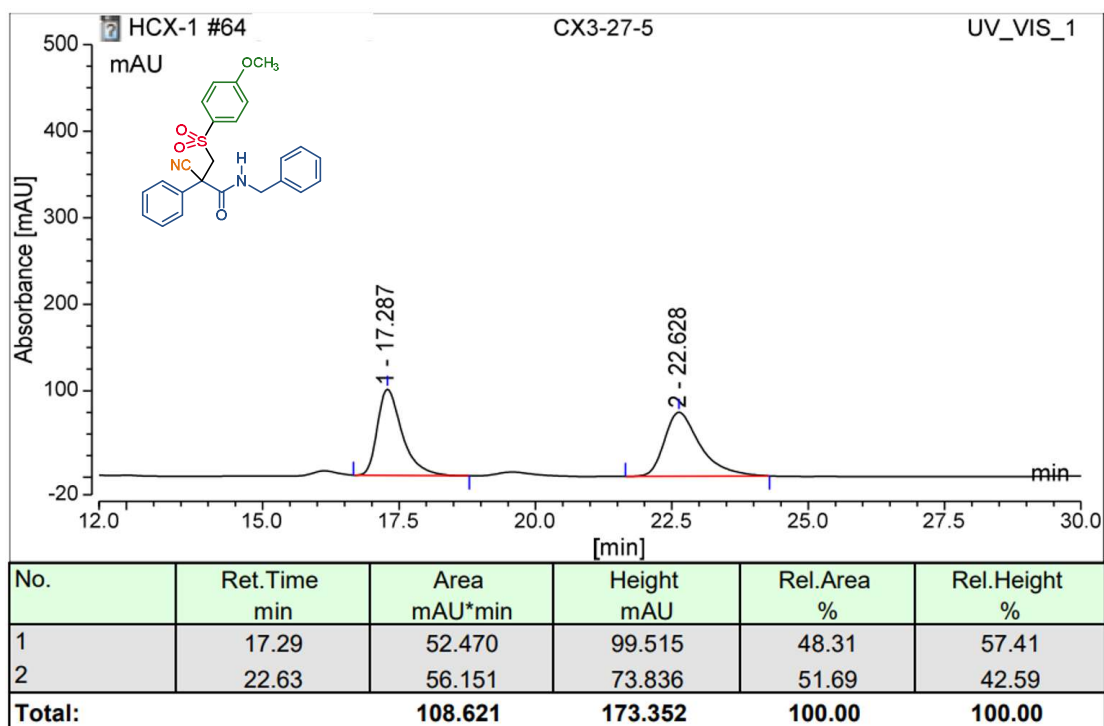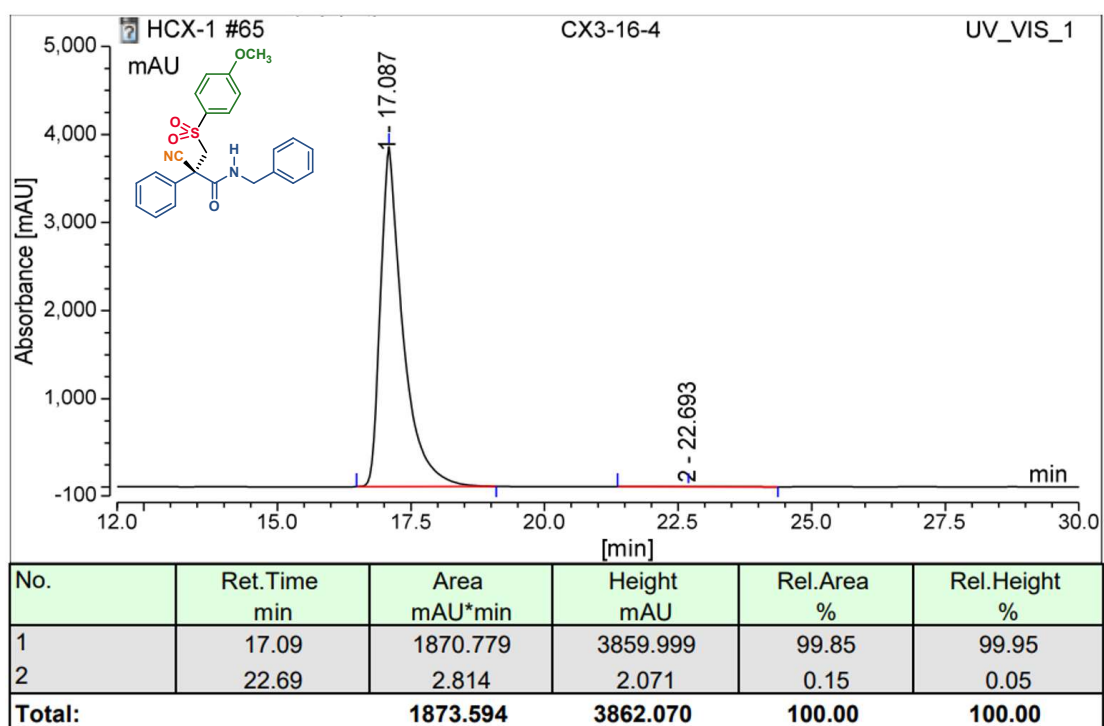

### HPLC chromatograms of Compound of 3ap

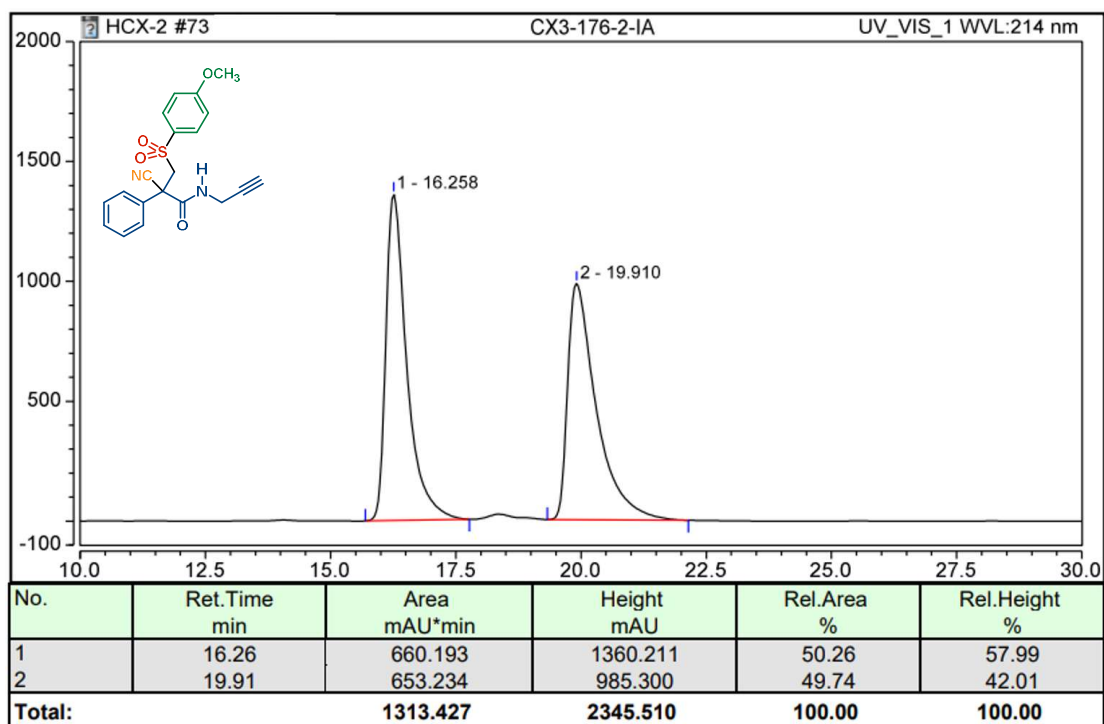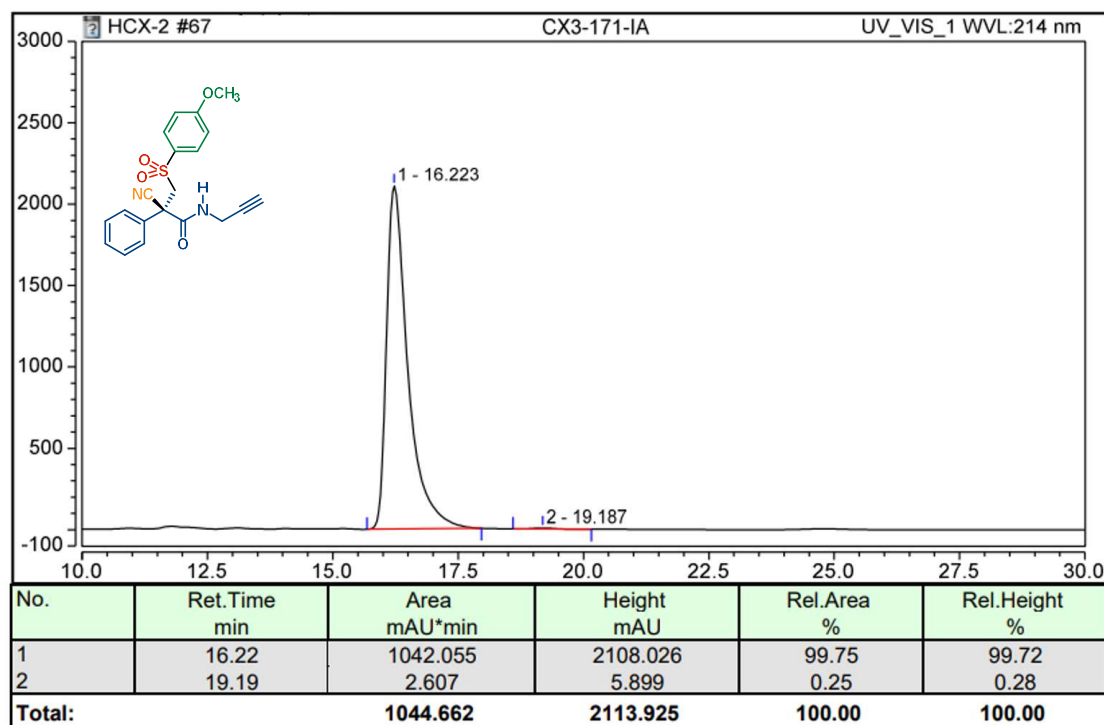



### HPLC chromatograms of Compound of 3aq

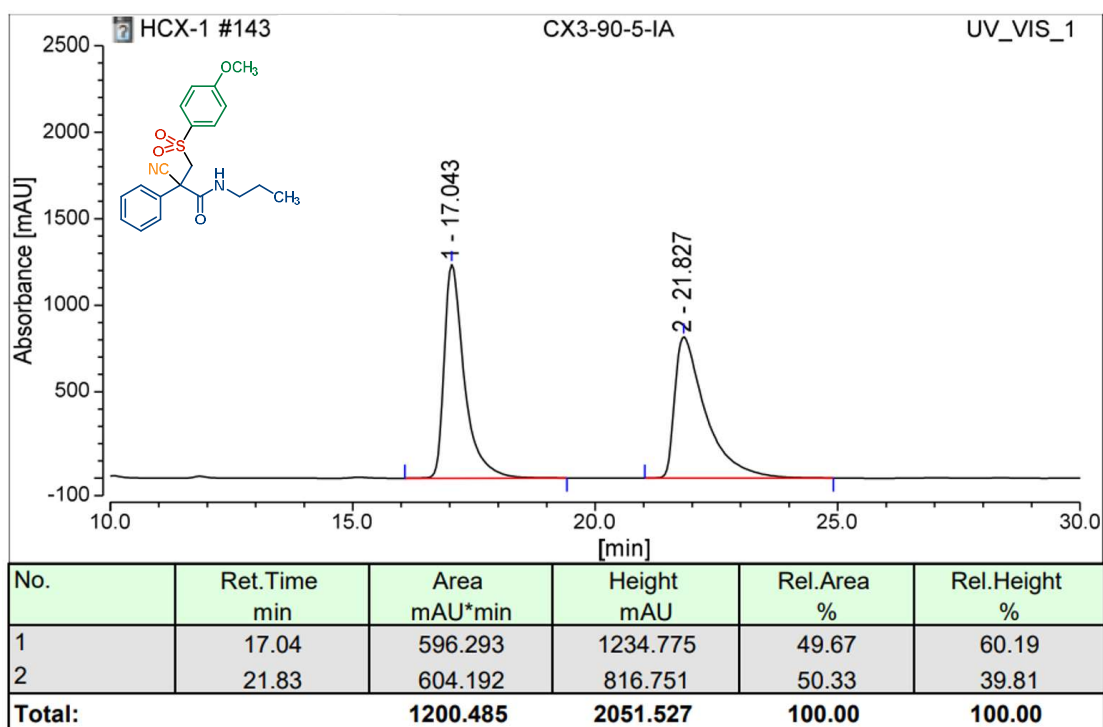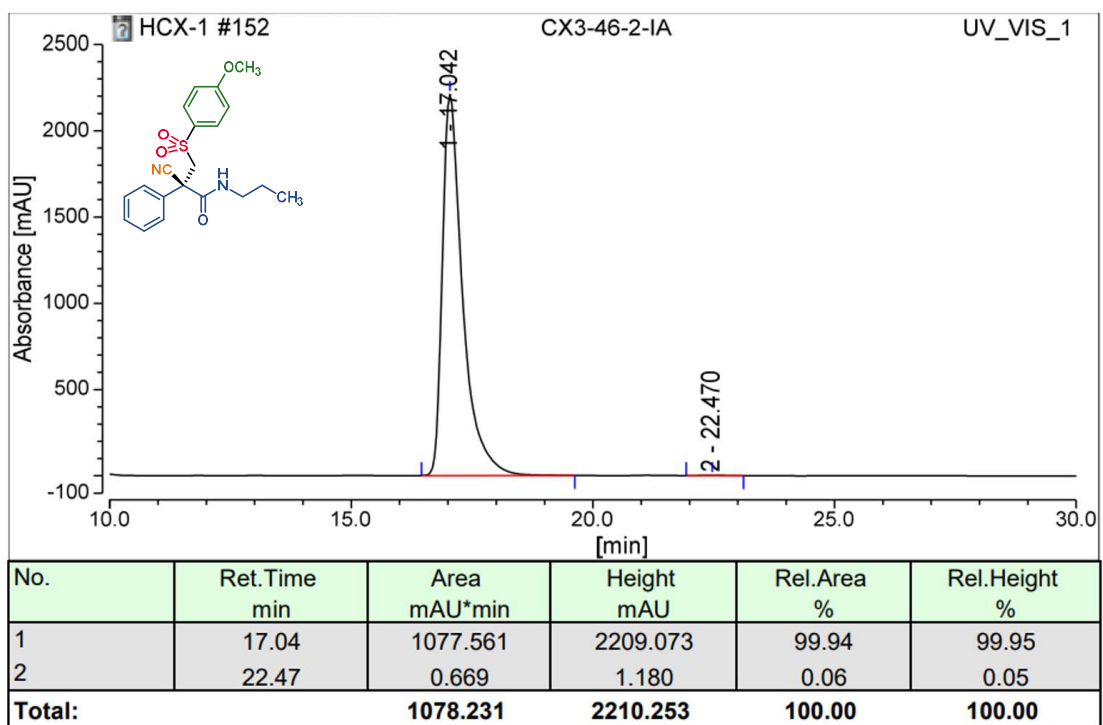

### HPLC chromatograms of Compound of 3ar

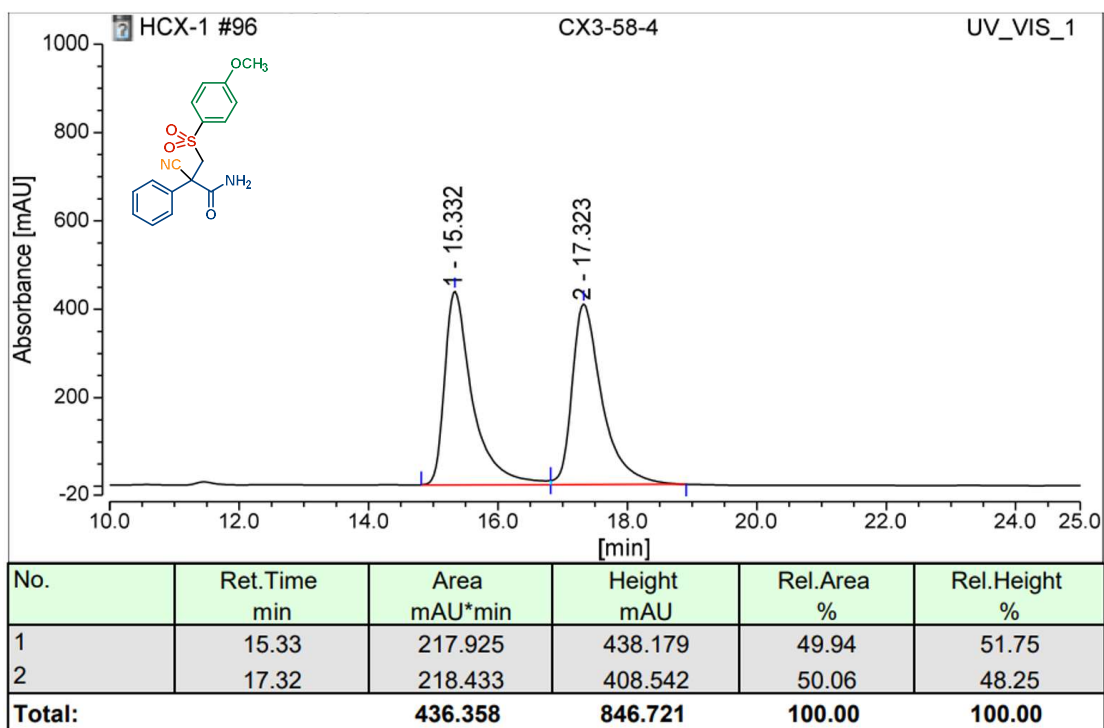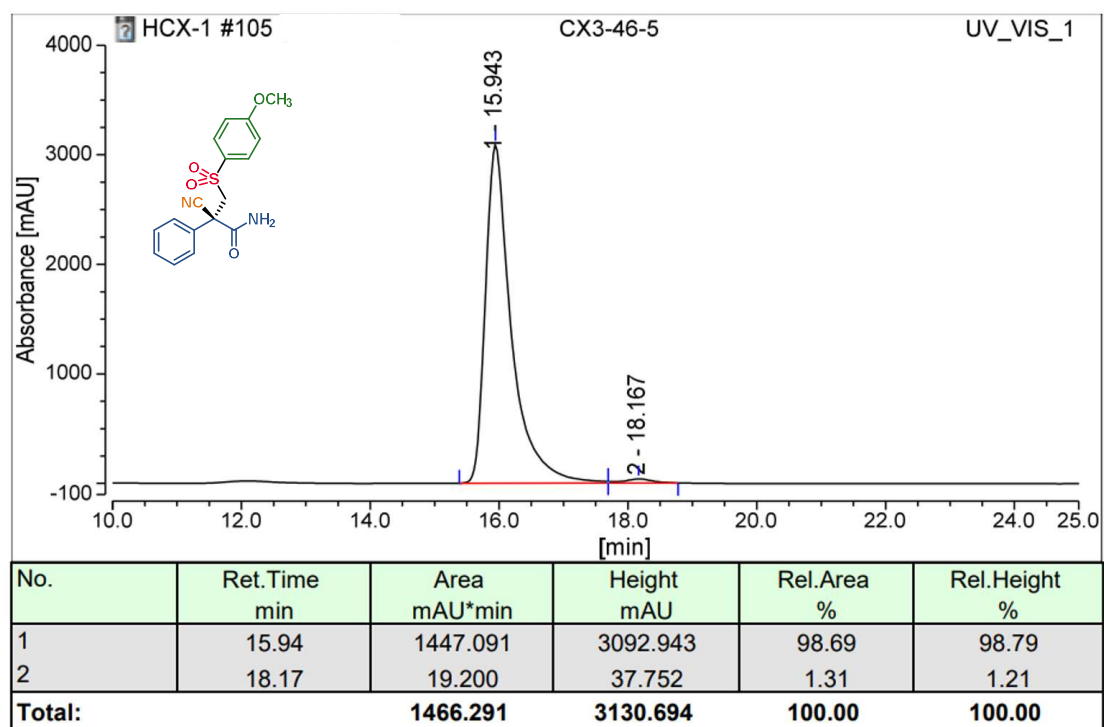

### HPLC chromatograms of Compound of 3as

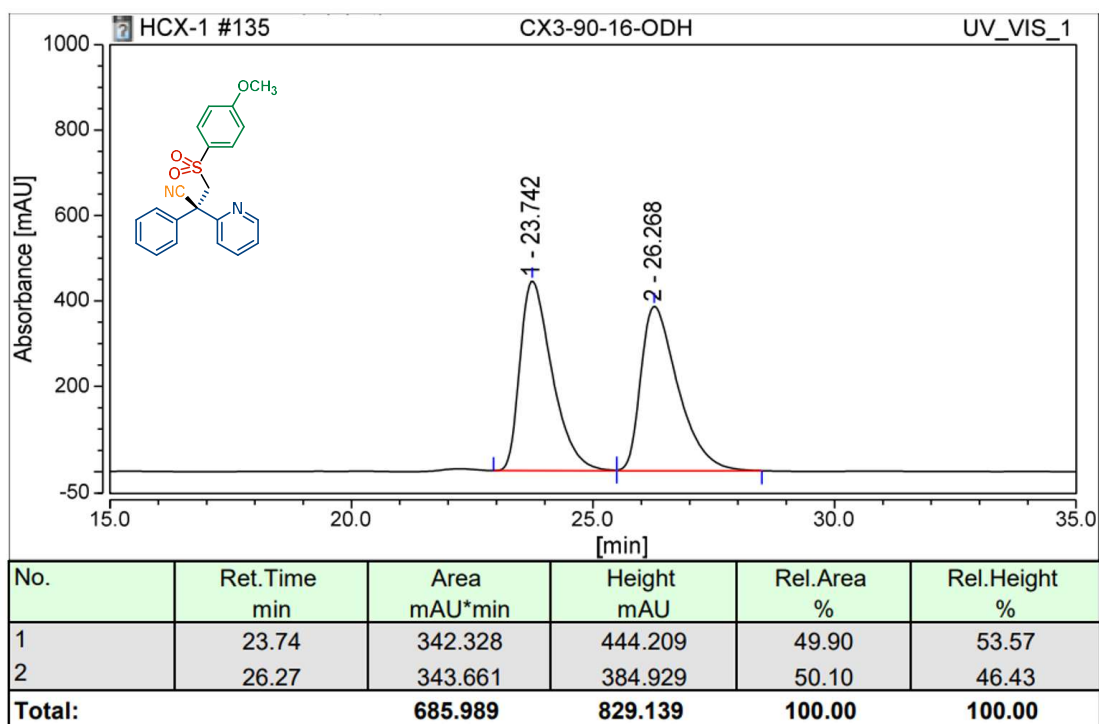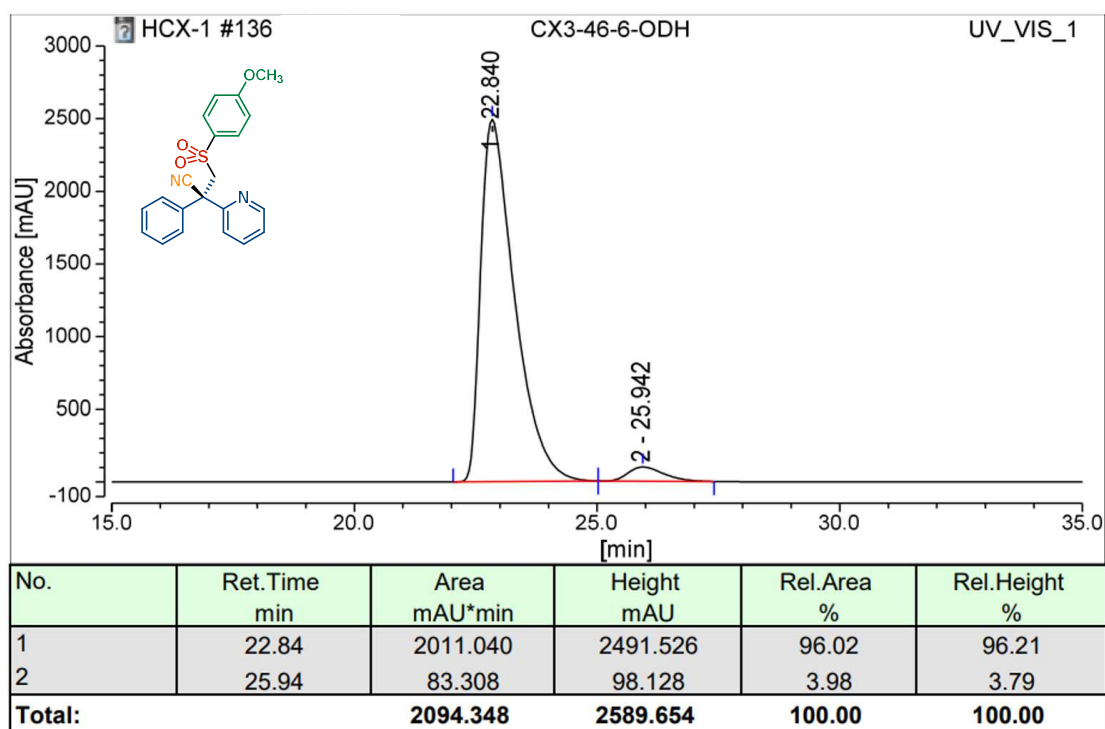

### HPLC chromatograms of Compound of 5a

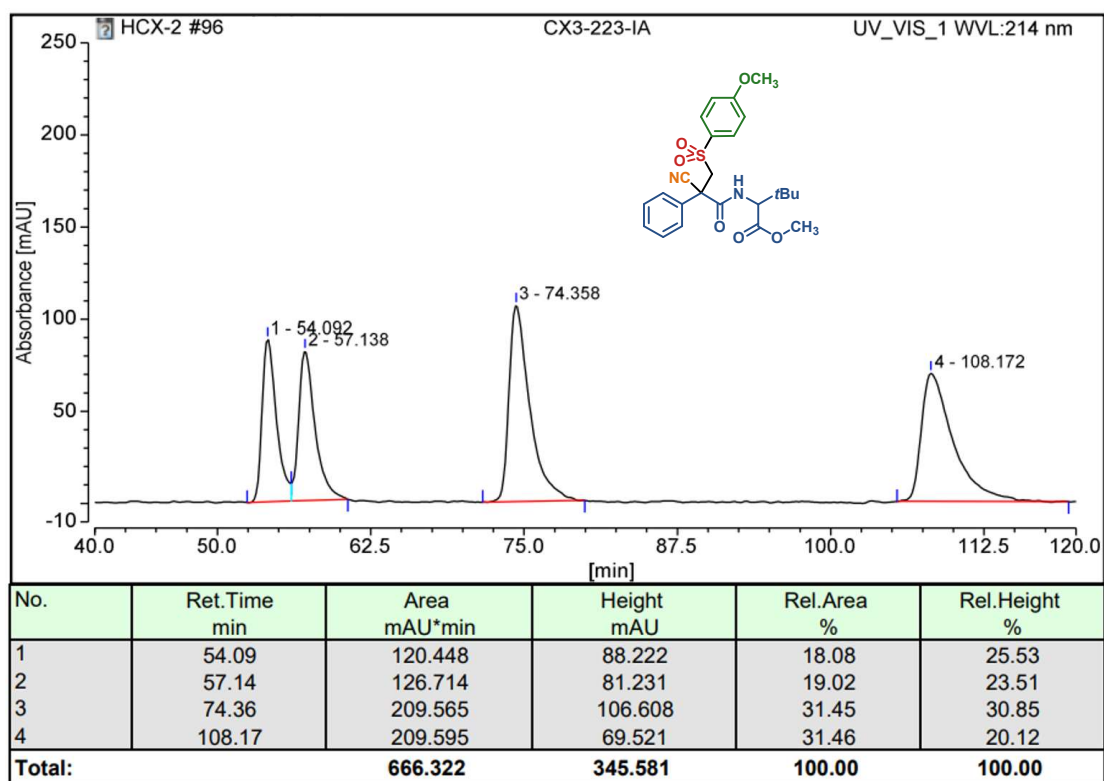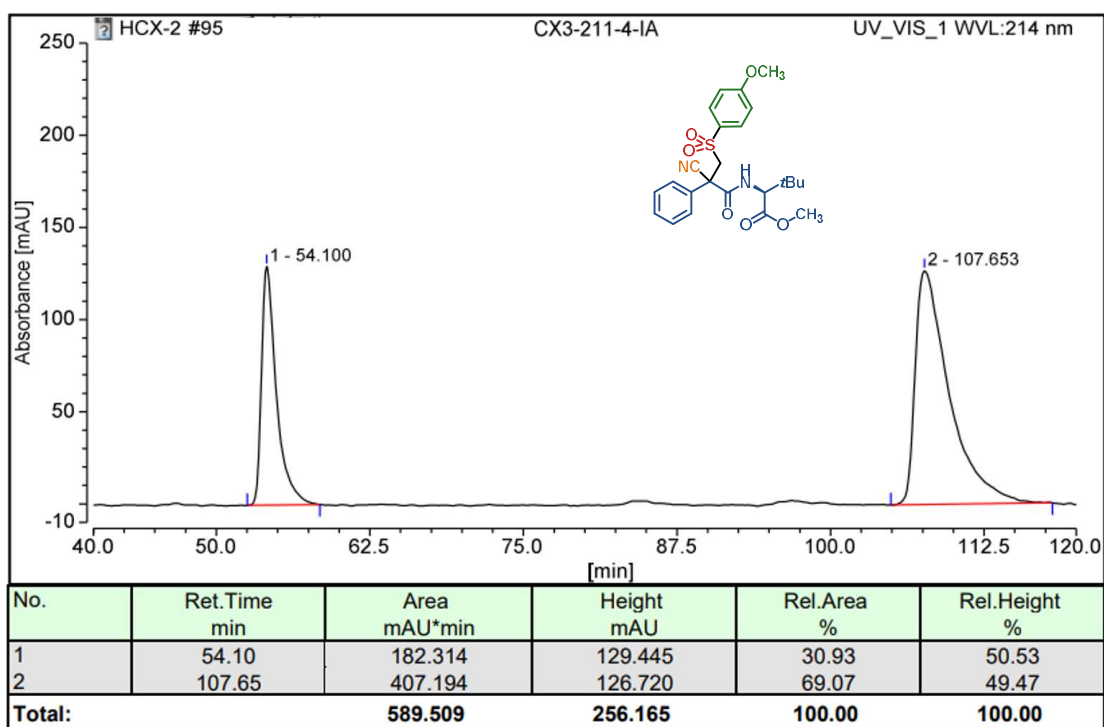

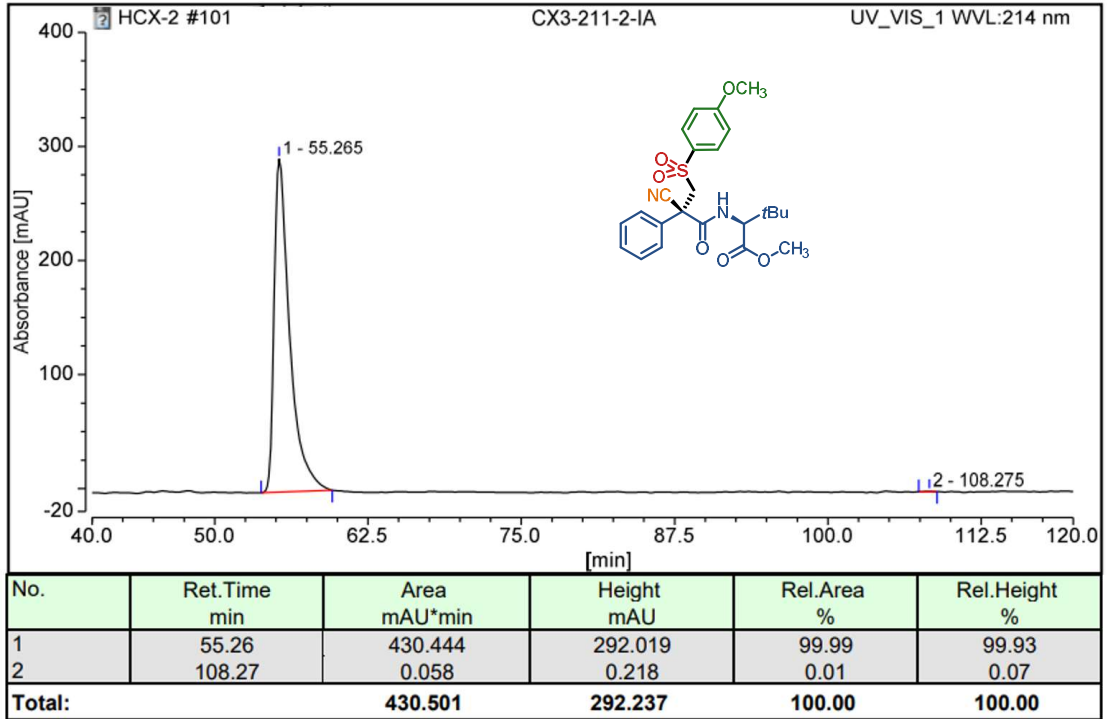

### HPLC chromatograms of Compound of 5b

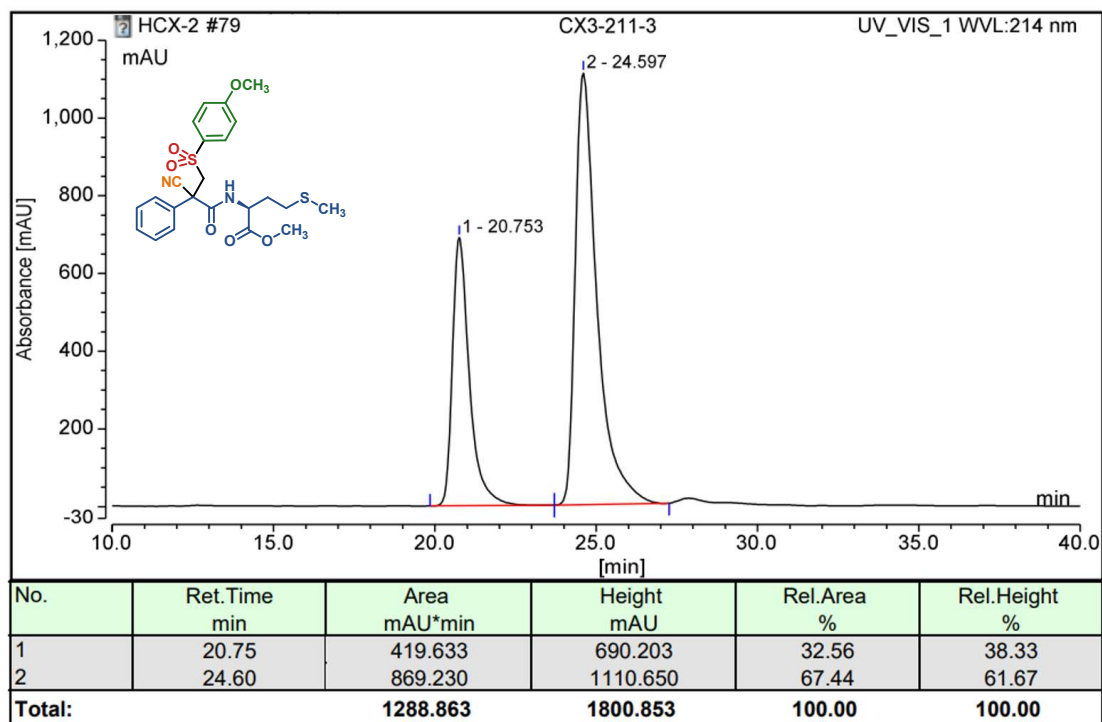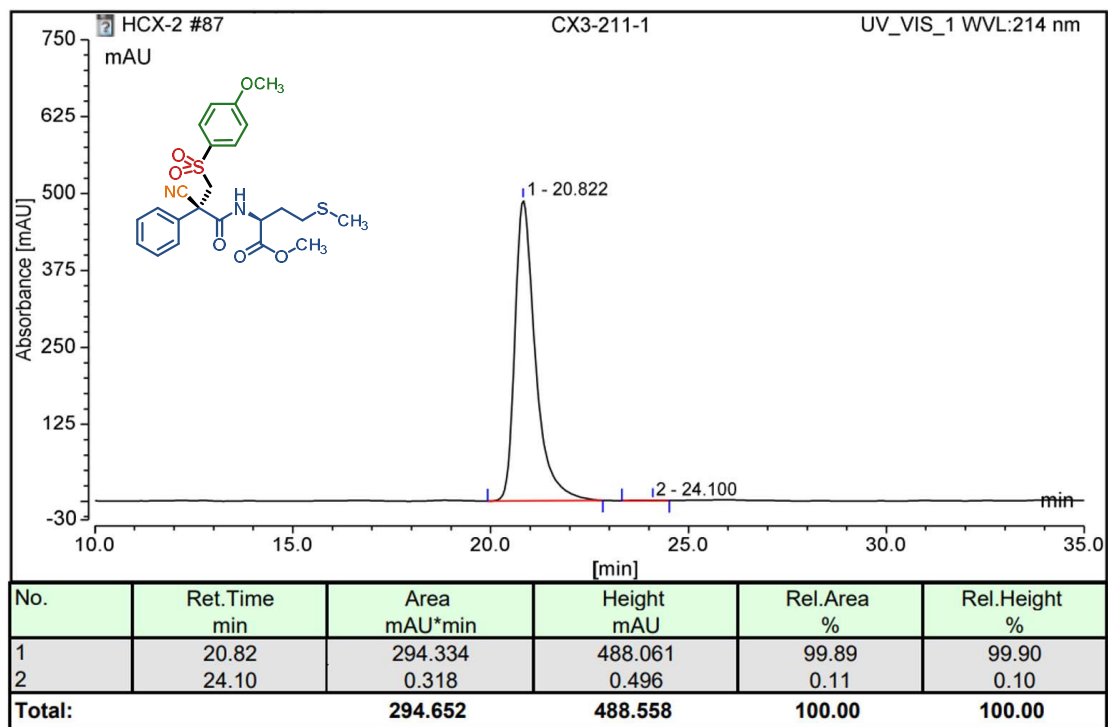

### HPLC chromatograms of Compound of 5c

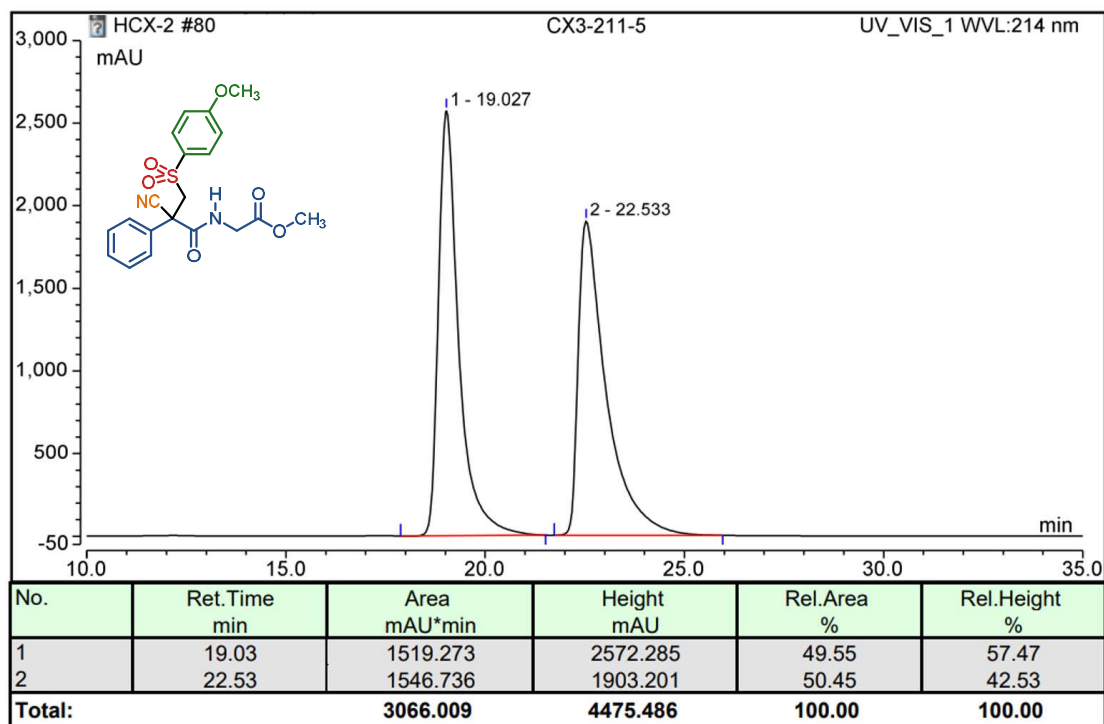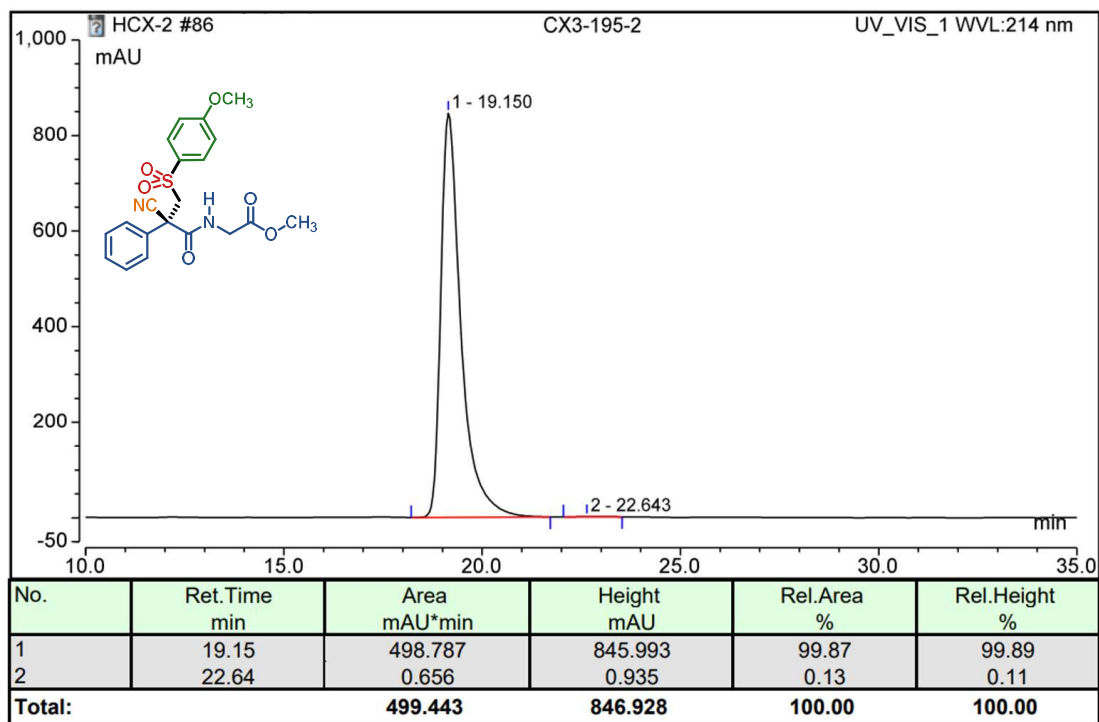

### HPLC chromatograms of Compound of 5d

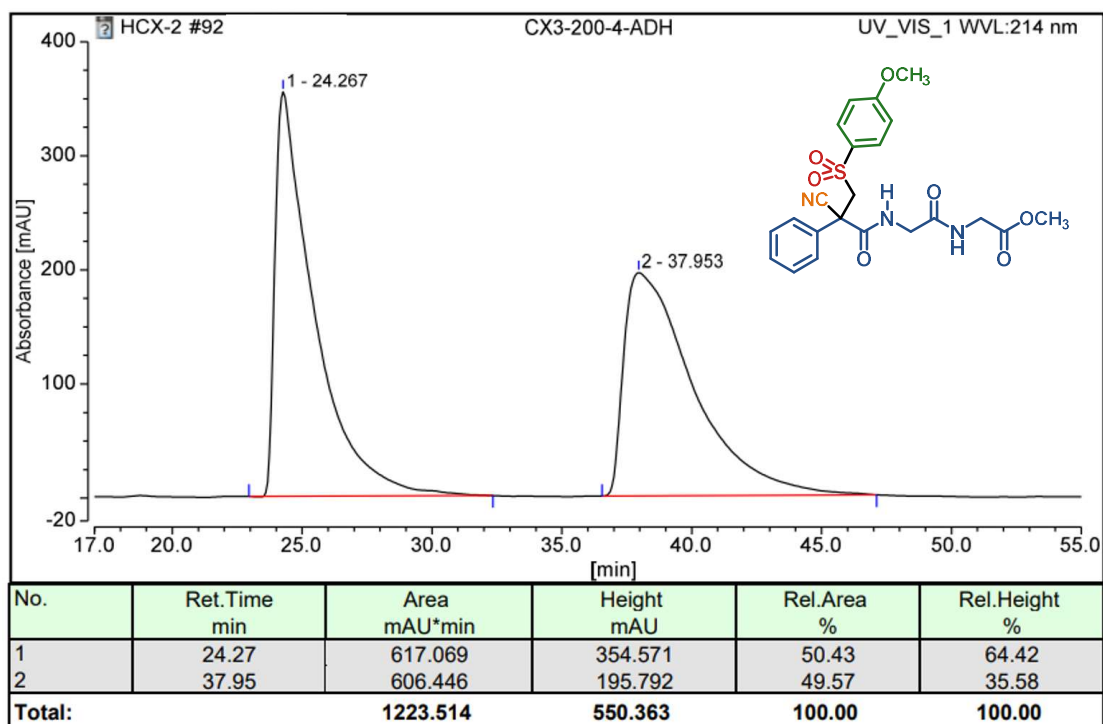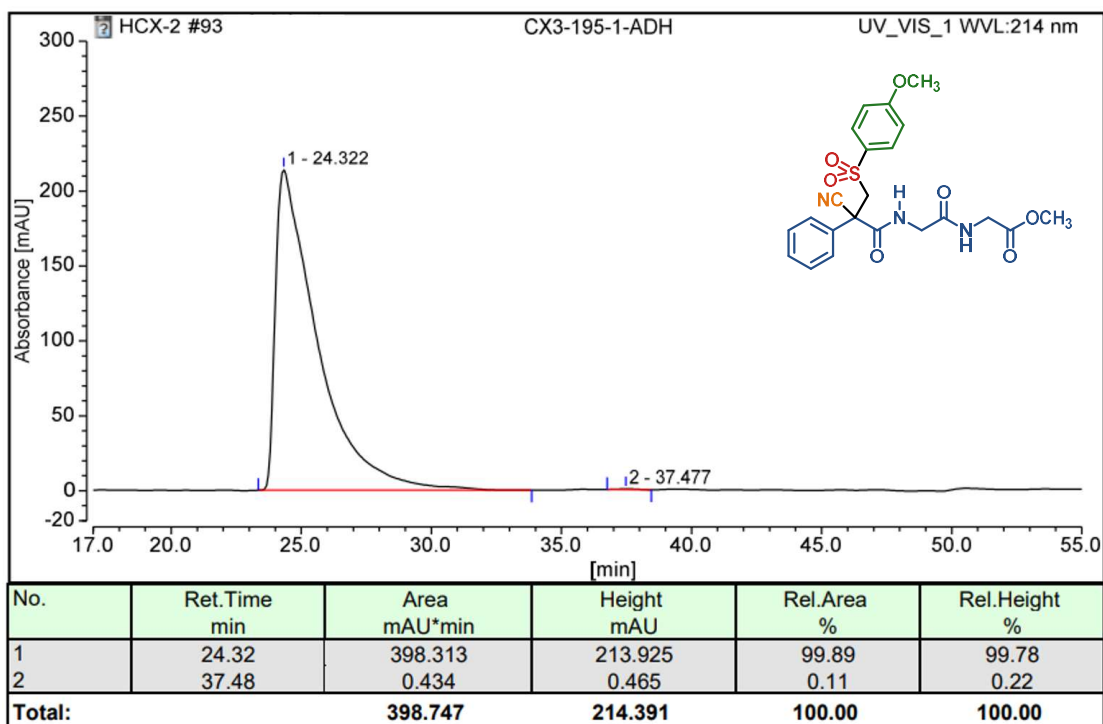



### HPLC chromatograms of Compound of 5e

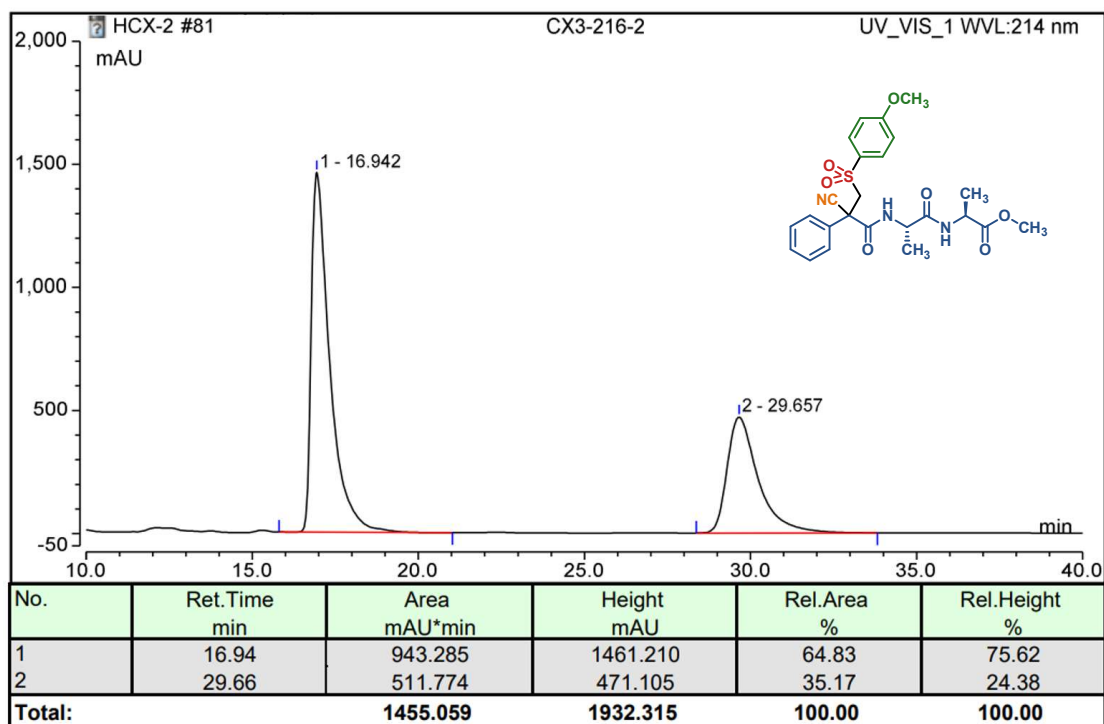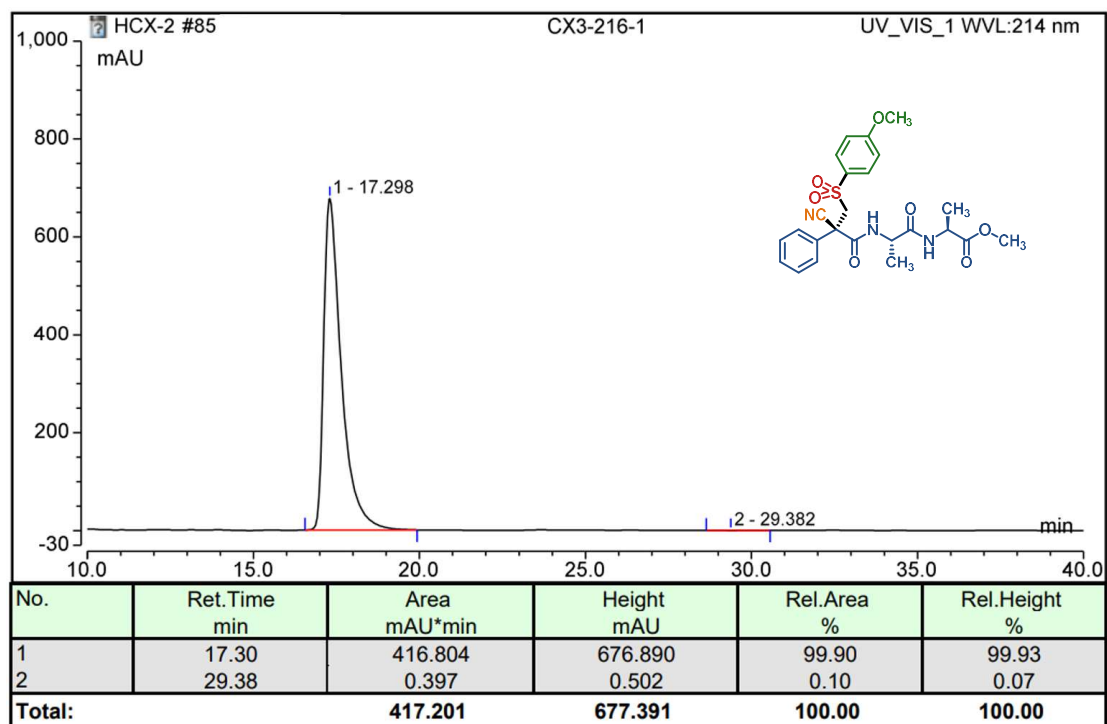

### HPLC chromatograms of Compound of 6

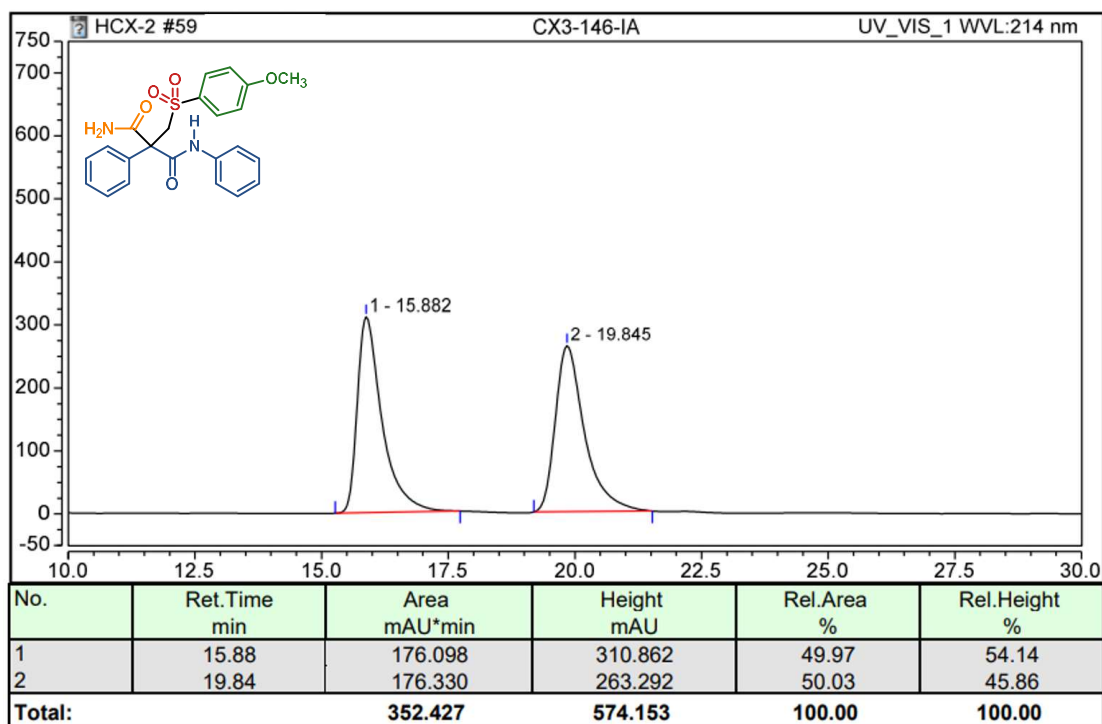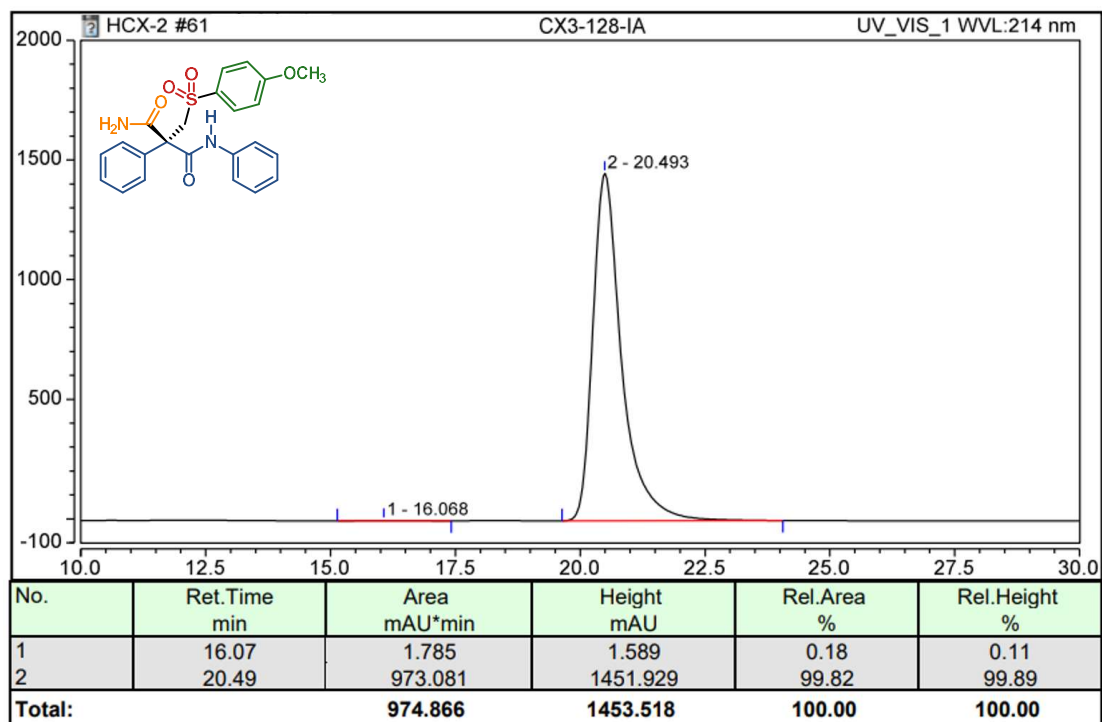

### HPLC chromatograms of Compound of 7

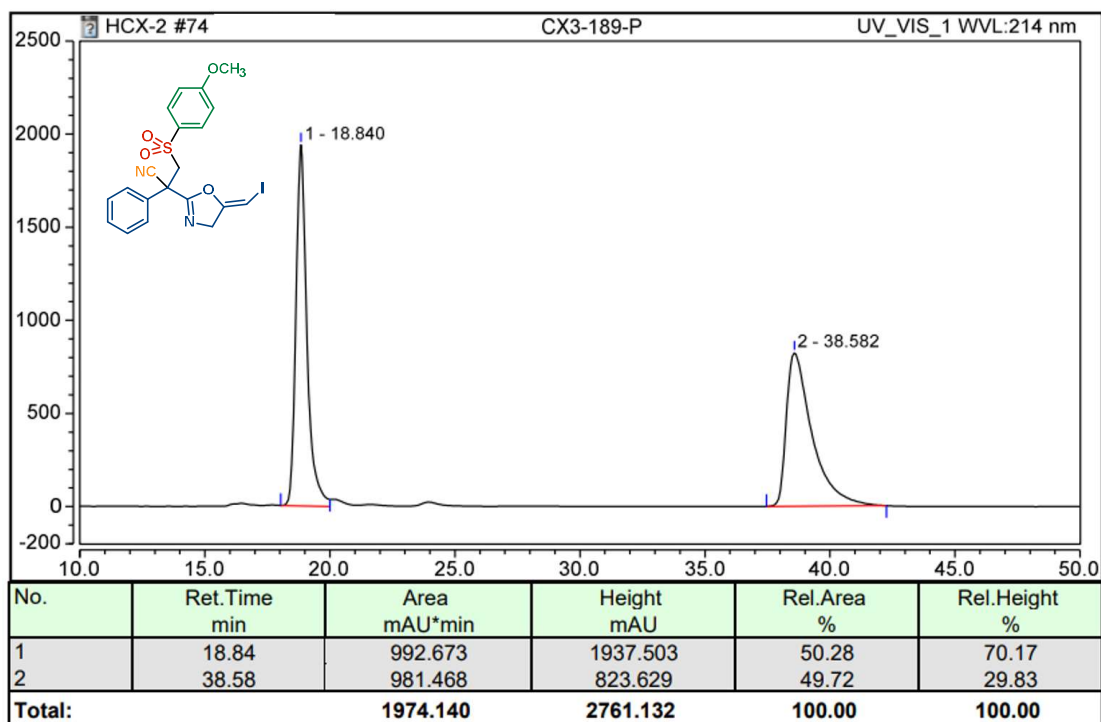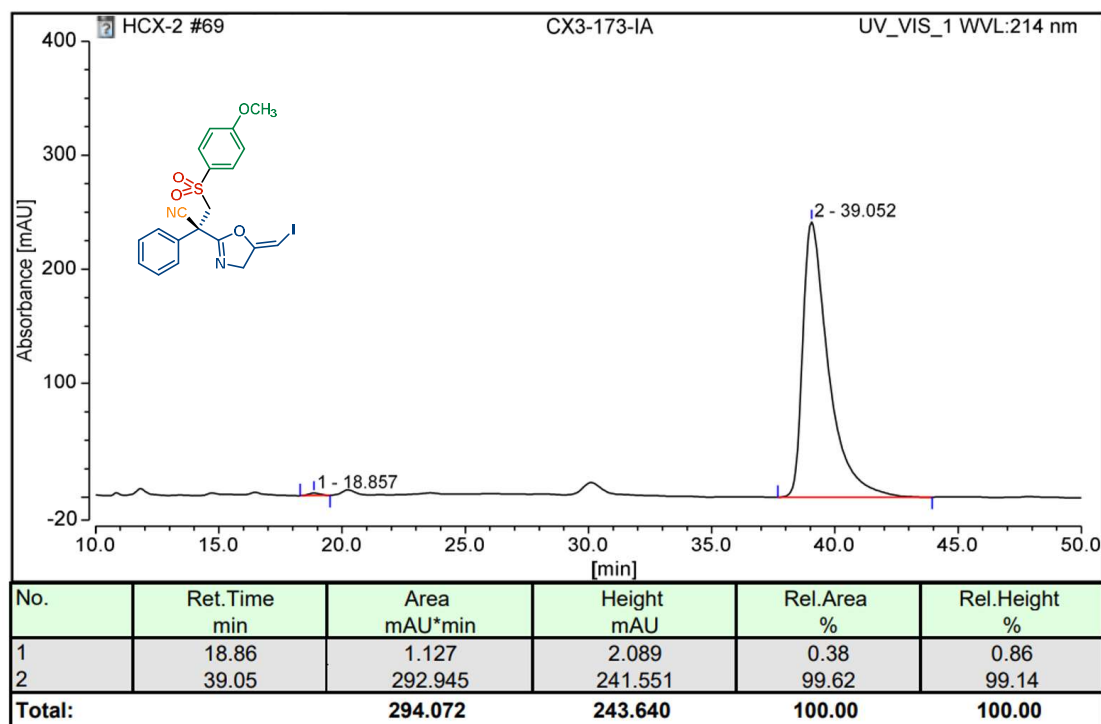

### HPLC chromatograms of Compound of 8

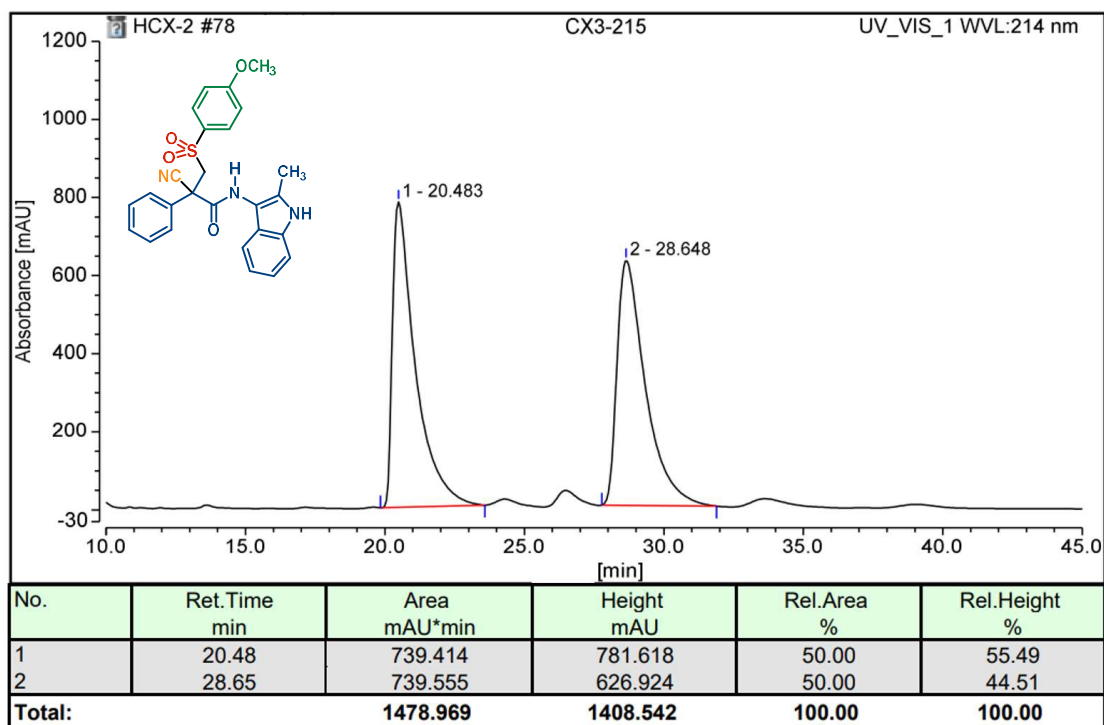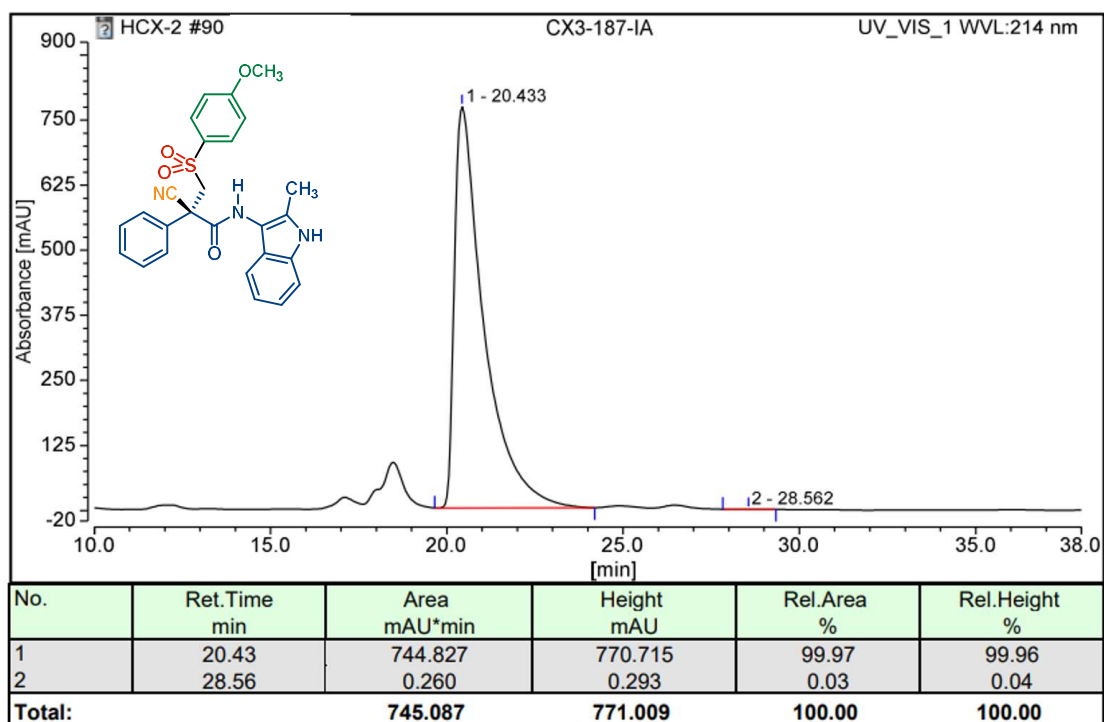

Supplement: d4qo00671b1.pdf [file d4qo00671b1.pdf]
